# Supplementary material
Source: MDPI journal article supplement (https://www.mdpi.com/2073-4352/13/7/999)
Supplement: s1 [file s1]

Archive with 3 entries (3 files):
- CIF S1.cif
- CIF S2.cif
- Supplementary Materials.pdf
