# Supplementary material
Source: MDPI journal article supplement (https://www.mdpi.com/2073-4352/13/7/999)
Supplement: s1 [file s1 › CIF S1.cif]

#=======================================================================
data_global
#=======================================================================

_audit_creation_method                   'Jana2006 Version : 25/10/2015'


# 1. PROCESSING SUMMARY (IUCr Office Use Only)

_journal_date_recd_electronic            ?
_journal_date_to_coeditor                ?
_journal_date_from_coeditor              ?
_journal_date_accepted                   ?
_journal_date_printers_first             ?
_journal_date_printers_final             ?
_journal_date_proofs_out                 ?
_journal_date_proofs_in                  ?
_journal_coeditor_name                   ?
_journal_coeditor_code                   ?
_journal_coeditor_notes
; ?
;
_journal_techeditor_code                 ?
_journal_paper_category                  ?
_journal_techeditor_notes
; ?
;
_journal_coden_ASTM                      ?
_journal_name_full                       'Acta Crystallographica Section C'
_journal_year                            ?
_journal_volume                          ?
_journal_issue                           ?
_journal_page_first                      ?
_journal_page_last                       ?
_journal_suppl_publ_number               ?
_journal_suppl_publ_pages                ?

#=======================================================================

# 2. SUBMISSION DETAILS

_publ_contact_author_name                ?
_publ_contact_author_address
; ?
;
_publ_contact_author_email               ?
_publ_contact_author_fax                 ?
_publ_contact_author_phone               ?

_publ_requested_journal                  'Acta Crystallographica Section C'
_publ_requested_category                 ?

_publ_contact_letter
; ?
;

#=======================================================================

# 3. TITLE AND AUTHOR LIST

_publ_section_title
; ?
;
_publ_section_title_footnote
; ?
;
loop_
 _publ_author_name
 _publ_author_footnote
 _publ_author_address
; ?      # name
;
; ?      # footnote
;
; ?      # address
;

#=======================================================================

# 4. TEXT

_publ_section_synopsis
; ?
;
_publ_section_abstract
; ?
;
_publ_section_comment
; ?
;
_publ_section_introduction
; ?
;
_publ_section_experimental
; ?
;
_publ_section_exptl_prep
; ?
;
_publ_section_exptl_refinement
; ?
;
_publ_section_exptl_solution
; ?
;
_publ_section_discussion
; ?
;
_publ_section_acknowledgements
; ?
;
_publ_section_references
;
Petricek, V., Dusek, M. & Palatinus L. (2014). Z. Kristallogr. 229(5), 345-352.

Palatinus L. & Chapuis G. (2007). J. Appl. Cryst. 40, 786-790.

# enable this reference if Diamond ver. 2 was used for visualization
#Brandenburg, K. (1999). DIAMOND. Version. 2.1c.
#Crystal Impact GbR, Bonn, Germany.

# enable this reference if Diamond ver. 3 was used for visualization
#Brandenburg, K. & Putz, H. (2005). DIAMOND Version 3.
#Crystal Impact GbR, Postfach 1251, D-53002 Bonn, Germany.

# enable this reference if SIR97 was used for solving of the structure
#Altomare, A., Burla, M. C., Camalli, M., Cascarano, G., Giacovazzo, C.,
#Guagliardi, A., Moliterni, A. G. G., Polidori, G., Spagna, R. (1997).
#SIR97. A Package for Crystal Structure Solution by Direct Methods
#and Refinement, Bari, Rome, Italy.

# use this reference if SIR2002 was used for solving of the structure
#Burla, M.C., Camalli, M., Carrozzini, B., Cascarano, G., Giacovazzo, C.,
#Polidori, G., Spagna, R.
#SIR2002: the program, J. Appl. Cryst, (2003). 36, 1103


# use this reference if SIR2011 was used for solving of the structure
#Burla, M.C., Caliandro, R., Camalli, M., Carrozzini, B., Cascarano,
#G.L., Giacovazzo, C., Mallamo. M., Mazzone, A., Polidori, G., Spagna, R.
#SIR2011: a new package for crystal structure determination and refinement,
#J.Appl.Cryst. (2012) 45, 357-361

# enable this reference if bond valences were calculated
#Brown, I. D. (1996). J. Appl. Cryst. 29, 479-480.

# enable this reference if Xshape wase used for crystal shape refinement
#Stoe & Cie (1998). X-SHAPE. Stoe & Cie, Darmstadt, Germany.


# enable this reference if Flack coefficient was refined
#Flack, H. D. (1983). Acta Cryst. A39, 876-881.
;
_publ_section_figure_captions
; ?
;
_publ_section_table_legends
; ?
;

#=======================================================================
data_I
#=======================================================================

# 5. CHEMICAL DATA

_chemical_name_systematic
; ?
;
_chemical_name_common                    ?
_chemical_formula_moiety                 ?
_chemical_formula_structural             ?
_chemical_formula_analytical             ?
_chemical_formula_iupac                  ?
_chemical_formula_sum                    'C22 H14'
_chemical_formula_weight                 278.4
_chemical_melting_point                  ?
_chemical_compound_source                ?
_chemical_absolute_configuration         .

#=======================================================================

# 6. CRYSTAL DATA

_symmetry_cell_setting                   triclinic
_symmetry_space_group_name_H-M           'P -1'
_symmetry_space_group_name_Hall          '-P 1'
_symmetry_Int_Tables_number              2

loop_
 _space_group_symop_id
 _space_group_symop_operation_xyz
 1   x,y,z
 2   -x,-y,-z

_cell_length_a                           6.28180(10)
_cell_length_b                           7.64780(10)
_cell_length_c                           14.3514(2)
_cell_angle_alpha                        76.9585(10)
_cell_angle_beta                         88.2777(10)
_cell_angle_gamma                        84.3391(10)
_cell_volume                             668.388(17)

loop_
 _twin_individual_id
 _twin_individual_mass_fraction_refined
 _twin_individual_twin_matrix_11
 _twin_individual_twin_matrix_12
 _twin_individual_twin_matrix_13
 _twin_individual_twin_matrix_21
 _twin_individual_twin_matrix_22
 _twin_individual_twin_matrix_23
 _twin_individual_twin_matrix_31
 _twin_individual_twin_matrix_32
 _twin_individual_twin_matrix_33
 ? ? ? ? ? ? ? ? ? ? ?

_cell_formula_units_Z                    2

_cell_measurement_reflns_used            27395
_cell_measurement_theta_min              2.72
_cell_measurement_theta_max              48.41
_cell_measurement_temperature            84.99(10)
_cell_special_details
; ?
;

_exptl_crystal_density_diffrn            1.3831
_exptl_crystal_density_meas              ?
_exptl_crystal_density_method            ?
_exptl_crystal_F_000                     292

_exptl_absorpt_coefficient_mu            0.078
_exptl_crystal_description               'plate'
_exptl_crystal_size_max                  0.392
_exptl_crystal_size_mid                  0.238
_exptl_crystal_size_min                  0.053
_exptl_crystal_size_rad                  ?
_exptl_crystal_colour                    'black'
_exptl_absorpt_correction_type           'gaussian'
_exptl_absorpt_process_details
;
CrysAlisPro 1.171.41.88a (Rigaku Oxford Diffraction, 2020)
Numerical absorption correction based on gaussian integration over
a multifaceted crystal model
Empirical absorption correction using spherical harmonics,
implemented in SCALE3 ABSPACK scaling algorithm.
;
_exptl_absorpt_correction_T_min          0.557
_exptl_absorpt_correction_T_max          1
loop_
 _exptl_crystal_face_index_h
 _exptl_crystal_face_index_k
 _exptl_crystal_face_index_l
 _exptl_crystal_face_perp_dist
 ? ? ? ?

#=======================================================================

# 7. EXPERIMENTAL DATA

_exptl_special_details                   ?

_diffrn_ambient_temperature              84.99
_diffrn_source                           'Rotating-anode X-ray tube'
_diffrn_source_power                     ?
_diffrn_source_voltage                   ?
_diffrn_source_current                   ?
_diffrn_radiation_type                   'Mo K\a'
_diffrn_radiation_source                 'X-ray tube'
_diffrn_radiation_wavelength             0.71073
_diffrn_radiation_monochromator          'mirror'
_diffrn_measurement_device               'four-circle diffractometer'
_diffrn_measurement_device_type          'XtaLAB Synergy R, DW system, HyPix-Arc 150'
_diffrn_detector                         'Hybrid Pixel Array Detector'
_diffrn_detector_area_resol_mean         10.0000
_diffrn_measurement_method               '\w scans'
_diffrn_measurement_specimen_support     ?

_diffrn_reflns_number                    57330
_diffrn_reflns_theta_min                 1.46
_diffrn_reflns_theta_max                 48.67
_diffrn_reflns_theta_full                37.98
_diffrn_measured_fraction_theta_max      0.89
_diffrn_measured_fraction_theta_full     0.98
_diffrn_reflns_av_R_equivalents          0.0146
_diffrn_reflns_av_unetI/netI             0.0128
_diffrn_reflns_limit_h_min               -11
_diffrn_reflns_limit_h_max               13
_diffrn_reflns_limit_k_min               -16
_diffrn_reflns_limit_k_max               12
_diffrn_reflns_limit_l_min               -30
_diffrn_reflns_limit_l_max               29
_diffrn_reflns_reduction_process         ?

_diffrn_standards_number                 ?
_diffrn_standards_interval_count         ?
_diffrn_standards_interval_time          ?
_diffrn_standards_decay_%                ?
loop_
_diffrn_standard_refln_index_h
_diffrn_standard_refln_index_k
_diffrn_standard_refln_index_l
  ? ? ?

_diffrn_radiation_probe                  X-ray

#=======================================================================

# 8. REFINEMENT DATA

_refine_special_details
; ?
;

_reflns_number_total                     6729
_reflns_number_gt                        5281
_reflns_threshold_expression             'I>3\s(I)'

_refine_ls_structure_factor_coef         F
_refine_ls_R_factor_gt                   0.0240
_refine_ls_wR_factor_gt                  0.0308
_refine_ls_R_factor_all                  0.0318
_refine_ls_wR_factor_ref                 0.0318
_refine_ls_goodness_of_fit_ref           1.83
_refine_ls_goodness_of_fit_gt            2.00
_refine_ls_restrained_S_gt               ?
_refine_ls_restrained_S_all              ?
_refine_ls_number_reflns                 6729
_refine_ls_number_parameters             200
_refine_ls_number_restraints             0
_refine_ls_number_constraints            56
_refine_ls_weighting_scheme              sigma
_refine_ls_weighting_details             'w=1/(\s^2^(F)+0.0001F^2^)'
_refine_ls_hydrogen_treatment            'constr'
_refine_ls_shift/su_max                  0.0495
_refine_ls_shift/su_mean                 0.0025
_refine_diff_density_max                 0.25
_refine_diff_density_min                 -0.19
_refine_ls_extinction_method
 'B-C type 2 (Becker & Coppens, 1974)'
_refine_ls_extinction_coef               700(1300)
_refine_ls_abs_structure_details         ?
_refine_ls_abs_structure_Flack           ?
_refine_ls_abs_structure_Rogers          ?

loop_
 _atom_type_symbol
 _atom_type_scat_dispersion_real
 _atom_type_scat_dispersion_imag
 _atom_type_scat_source
 C    0.0033  0.0016
 'International Tables Vol C tables 4.2.6.8 and 6.1.1.1'
 H    0.0000  0.0000
 'International Tables Vol C tables 4.2.6.8 and 6.1.1.1'

_computing_data_collection
 'CrysAlisPro 1.171.41.88a (Rigaku OD, 2020)'
_computing_cell_refinement
 'CrysAlisPro 1.171.41.88a (Rigaku OD, 2020)'
_computing_data_reduction
 'CrysAlisPro 1.171.41.88a (Rigaku OD, 2020)'
_computing_structure_solution            ?
_computing_structure_refinement          ?
_computing_molecular_graphics            ?
_computing_publication_material          ?

loop_
 _restr_distance_atom_site_label_1
 _restr_distance_site_symmetry_1
 _restr_distance_atom_site_label_2
 _restr_distance_site_symmetry_2
 _restr_distance_target
 _restr_distance_target_weight_param
 ? ? ? ? ? ?

loop_
 _restr_angle_atom_site_label_1
 _restr_angle_site_symmetry_1
 _restr_angle_atom_site_label_2
 _restr_angle_site_symmetry_2
 _restr_angle_atom_site_label_3
 _restr_angle_site_symmetry_3
 _restr_angle_target
 _restr_angle_target_weight_param
 ? ? ? ? ? ? ? ?

loop_
 _restr_torsion_atom_site_label_1
 _restr_torsion_site_symmetry_1
 _restr_torsion_atom_site_label_2
 _restr_torsion_site_symmetry_2
 _restr_torsion_atom_site_label_3
 _restr_torsion_site_symmetry_3
 _restr_torsion_atom_site_label_4
 _restr_torsion_site_symmetry_4
 _restr_torsion_angle_target
 _restr_torsion_weight_param
 ? ? ? ? ? ? ? ? ? ?

loop_
 _restr_equal_distance_atom_site_label_1
 _restr_equal_distance_site_symmetry_1
 _restr_equal_distance_atom_site_label_2
 _restr_equal_distance_site_symmetry_2
 _restr_equal_distance_class_class_id
 _restr_equal_distance_class_target_weight_param
 ? ? ? ? ? ?

loop_
 _restr_equal_angle_atom_site_label_1
 _restr_equal_angle_site_symmetry_1
 _restr_equal_angle_atom_site_label_2
 _restr_equal_angle_site_symmetry_2
 _restr_equal_angle_atom_site_label_3
 _restr_equal_angle_site_symmetry_3
 _restr_equal_angle_class_class_id
 _restr_equal_angle_class_target_weight_param
 ? ? ? ? ? ? ? ?

loop_
 _restr_equal_torsion_atom_site_label_1
 _restr_equal_torsion_site_symmetry_1
 _restr_equal_torsion_atom_site_label_2
 _restr_equal_torsion_site_symmetry_2
 _restr_equal_torsion_atom_site_label_3
 _restr_equal_torsion_site_symmetry_3
 _restr_equal_torsion_atom_site_label_4
 _restr_equal_torsion_site_symmetry_4
 _restr_equal_torsion_class_class_id
 _restr_equal_torsion_class_target_weight_param
 ? ? ? ? ? ? ? ? ? ?


#=======================================================================

# 9. ATOMIC COORDINATES AND DISPLACEMENT PARAMETERS

loop_
 _atom_site_label
 _atom_site_type_symbol
 _atom_site_fract_x
 _atom_site_fract_y
 _atom_site_fract_z
 _atom_site_adp_type
 _atom_site_U_iso_or_equiv
 _atom_site_site_symmetry_multiplicity
 _atom_site_occupancy
 _atom_site_calc_flag
 _atom_site_refinement_flags
 _atom_site_disorder_assembly
 _atom_site_disorder_group
  C1 C 0.15543(4) 0.59953(3) 0.442807(15) Uani 0.00858(5) 2 1 d . . .
  C2 C -0.03167(4) 0.55536(3) 0.399408(15) Uani 0.00862(5) 2 1 d . . .
  C3 C 0.27859(4) 0.75488(3) 0.285199(15) Uani 0.00926(5) 2 1 d . . .
  C4 C 0.66497(4) 0.02654(3) 0.429545(15) Uani 0.00874(5) 2 1 d . . .
  C5 C 0.18225(4) 0.54332(3) 0.542228(15) Uani 0.00915(5) 2 1 d . . .
  C6 C 0.45758(4) 0.12906(3) 0.412695(15) Uani 0.00880(5) 2 1 d . . .
  C7 C 0.06612(4) 0.77104(3) 0.140221(15) Uani 0.01163(6) 2 1 d . . .
  C8 C 0.30653(4) 0.69911(3) 0.383644(15) Uani 0.00948(5) 2 1 d . . .
  C9 C 0.57922(4) 0.28224(3) 0.254400(15) Uani 0.00948(5) 2 1 d . . .
  C10 C 0.78629(4) 0.18019(3) 0.271321(15) Uani 0.00943(5) 2 1 d . . .
  C11 C 0.90535(4) 0.32993(3) 0.112982(16) Uani 0.01324(6) 2 1 d . . .
  C12 C 0.09162(4) 0.71111(3) 0.241942(15) Uani 0.00937(5) 2 1 d . . .
  C13 C 0.70191(4) -0.10016(3) 0.516319(15) Uani 0.00934(5) 2 1 d . . .
  C14 C 0.43040(4) 0.85725(3) 0.224911(15) Uani 0.01127(6) 2 1 d . . .
  C15 C -0.05793(4) 0.61285(3) 0.299158(15) Uani 0.00961(5) 2 1 d . . .
  C16 C 0.70025(4) 0.43137(3) 0.096142(16) Uani 0.01350(6) 2 1 d . . .
  C17 C 0.21533(4) 0.86714(3) 0.085275(16) Uani 0.01316(6) 2 1 d . . .
  C18 C 0.54264(4) 0.40830(3) 0.164450(16) Uani 0.01180(6) 2 1 d . . .
  C19 C 0.82488(4) 0.05585(3) 0.357552(15) Uani 0.00973(5) 2 1 d . . .
  C20 C 0.39970(4) 0.91151(3) 0.128390(16) Uani 0.01321(6) 2 1 d . . .
  C21 C 0.42116(4) 0.25568(3) 0.324822(15) Uani 0.00973(5) 2 1 d . . .
  C22 C 0.94712(4) 0.20863(3) 0.197595(16) Uani 0.01148(6) 2 1 d . . .
  H1c5 H 0.306049 0.572942 0.570904 Uiso 0.011 2 1 d . . .
  H1c7 H -0.057234 0.74326 0.110444 Uiso 0.014 2 1 d . . .
  H1c8 H 0.430754 0.72875 0.411998 Uiso 0.0114 2 1 d . . .
  H1c11 H 1.014352 0.347426 0.064321 Uiso 0.0159 2 1 d . . .
  H1c13 H 0.839022 -0.168421 0.527326 Uiso 0.0112 2 1 d . . .
  H1c14 H 0.554795 0.887905 0.252696 Uiso 0.0135 2 1 d . . .
  H1c15 H -0.181337 0.583449 0.270096 Uiso 0.0115 2 1 d . . .
  H1c16 H 0.673359 0.51625 0.036367 Uiso 0.0162 2 1 d . . .
  H1c17 H 0.196447 0.905157 0.017331 Uiso 0.0158 2 1 d . . .
  H1c18 H 0.406134 0.47712 0.152124 Uiso 0.0142 2 1 d . . .
  H1c19 H 0.962622 -0.011386 0.368441 Uiso 0.0117 2 1 d . . .
  H1c20 H 0.502603 0.979992 0.089109 Uiso 0.0158 2 1 d . . .
  H1c21 H 0.284533 0.324675 0.313576 Uiso 0.0117 2 1 d . . .
  H1c22 H 1.085212 0.141811 0.20786 Uiso 0.0138 2 1 d . . .

loop_
 _atom_site_aniso_label
 _atom_site_aniso_type_symbol
 _atom_site_aniso_U_11
 _atom_site_aniso_U_22
 _atom_site_aniso_U_33
 _atom_site_aniso_U_12
 _atom_site_aniso_U_13
 _atom_site_aniso_U_23
 C1 C 0.00819(9) 0.00874(9) 0.00897(8) -0.00124(7) -0.00085(6) -0.00205(7)
 C2 C 0.00841(9) 0.00883(9) 0.00878(8) -0.00120(7) -0.00097(6) -0.00203(7)
 C3 C 0.00901(9) 0.00926(9) 0.00957(8) -0.00127(7) -0.00010(7) -0.00203(7)
 C4 C 0.00791(9) 0.00885(9) 0.00948(8) -0.00013(7) -0.00055(7) -0.00233(7)
 C5 C 0.00871(9) 0.00968(9) 0.00929(8) -0.00160(7) -0.00119(6) -0.00213(7)
 C6 C 0.00823(9) 0.00879(9) 0.00930(8) 0.00001(7) -0.00058(7) -0.00214(7)
 C7 C 0.01280(10) 0.01265(10) 0.00943(8) -0.00194(8) -0.00080(7) -0.00200(7)
 C8 C 0.00898(9) 0.00988(9) 0.00974(8) -0.00159(7) -0.00072(7) -0.00213(7)
 C9 C 0.00959(9) 0.00965(9) 0.00915(8) -0.00051(7) -0.00071(7) -0.00208(7)
 C10 C 0.00898(9) 0.00989(9) 0.00963(8) -0.00081(7) -0.00003(7) -0.00267(7)
 C11 C 0.01326(10) 0.01546(10) 0.01075(9) -0.00225(8) 0.00123(7) -0.00218(7)
 C12 C 0.00970(9) 0.00958(9) 0.00892(8) -0.00117(7) -0.00069(7) -0.00209(7)
 C13 C 0.00829(9) 0.00955(9) 0.00983(8) 0.00047(7) -0.00065(7) -0.00190(7)
 C14 C 0.01082(9) 0.01179(10) 0.01129(9) -0.00233(8) 0.00075(7) -0.00231(7)
 C15 C 0.00966(9) 0.01014(9) 0.00919(8) -0.00172(7) -0.00123(7) -0.00199(7)
 C16 C 0.01412(10) 0.01512(10) 0.01035(9) -0.00179(8) -0.00026(7) -0.00076(7)
 C17 C 0.01421(10) 0.01491(10) 0.01011(9) -0.00250(8) 0.00048(7) -0.00187(7)
 C18 C 0.01219(10) 0.01220(10) 0.01025(8) -0.00047(8) -0.00121(7) -0.00108(7)
 C19 C 0.00884(9) 0.01004(9) 0.01013(8) 0.00007(7) -0.00024(7) -0.00223(7)
 C20 C 0.01339(10) 0.01458(10) 0.01130(9) -0.00308(8) 0.00145(7) -0.00160(7)
 C21 C 0.00927(9) 0.00982(9) 0.00971(8) 0.00023(7) -0.00079(7) -0.00178(7)
 C22 C 0.01072(9) 0.01262(10) 0.01113(9) -0.00100(8) 0.00097(7) -0.00291(7)

loop_
 _jana_atom_site_ADP_C_label
 _jana_atom_site_ADP_C_type_symbol
 _jana_atom_site_ADP_C_111
 _jana_atom_site_ADP_C_112
 _jana_atom_site_ADP_C_113
 _jana_atom_site_ADP_C_122
 _jana_atom_site_ADP_C_123
 _jana_atom_site_ADP_C_133
 _jana_atom_site_ADP_C_222
 _jana_atom_site_ADP_C_223
 _jana_atom_site_ADP_C_233
 _jana_atom_site_ADP_C_333
 ? ? ? ? ? ? ? ? ? ? ? ?

loop_
 _jana_atom_site_ADP_D_label
 _jana_atom_site_ADP_D_type_symbol
 _jana_atom_site_ADP_D_1111
 _jana_atom_site_ADP_D_1112
 _jana_atom_site_ADP_D_1113
 _jana_atom_site_ADP_D_1122
 _jana_atom_site_ADP_D_1123
 _jana_atom_site_ADP_D_1133
 _jana_atom_site_ADP_D_1222
 _jana_atom_site_ADP_D_1223
 _jana_atom_site_ADP_D_1233
 _jana_atom_site_ADP_D_1333
 _jana_atom_site_ADP_D_2222
 _jana_atom_site_ADP_D_2223
 _jana_atom_site_ADP_D_2233
 _jana_atom_site_ADP_D_2333
 _jana_atom_site_ADP_D_3333
 ? ? ? ? ? ? ? ? ? ? ? ? ? ? ? ? ?

loop_
 _jana_atom_site_ADP_E_label
 _jana_atom_site_ADP_E_type_symbol
 _jana_atom_site_ADP_E_11111
 _jana_atom_site_ADP_E_11112
 _jana_atom_site_ADP_E_11113
 _jana_atom_site_ADP_E_11122
 _jana_atom_site_ADP_E_11123
 _jana_atom_site_ADP_E_11133
 _jana_atom_site_ADP_E_11222
 _jana_atom_site_ADP_E_11223
 _jana_atom_site_ADP_E_11233
 _jana_atom_site_ADP_E_11333
 _jana_atom_site_ADP_E_12222
 _jana_atom_site_ADP_E_12223
 _jana_atom_site_ADP_E_12233
 _jana_atom_site_ADP_E_12333
 _jana_atom_site_ADP_E_13333
 _jana_atom_site_ADP_E_22222
 _jana_atom_site_ADP_E_22223
 _jana_atom_site_ADP_E_22233
 _jana_atom_site_ADP_E_22333
 _jana_atom_site_ADP_E_23333
 _jana_atom_site_ADP_E_33333
 ? ? ? ? ? ? ? ? ? ? ? ? ? ? ? ? ? ? ? ? ? ? ?

loop_
 _jana_atom_site_ADP_F_label
 _jana_atom_site_ADP_F_type_symbol
 _jana_atom_site_ADP_F_111111
 _jana_atom_site_ADP_F_111112
 _jana_atom_site_ADP_F_111113
 _jana_atom_site_ADP_F_111122
 _jana_atom_site_ADP_F_111123
 _jana_atom_site_ADP_F_111133
 _jana_atom_site_ADP_F_111222
 _jana_atom_site_ADP_F_111223
 _jana_atom_site_ADP_F_111233
 _jana_atom_site_ADP_F_111333
 _jana_atom_site_ADP_F_112222
 _jana_atom_site_ADP_F_112223
 _jana_atom_site_ADP_F_112233
 _jana_atom_site_ADP_F_112333
 _jana_atom_site_ADP_F_113333
 _jana_atom_site_ADP_F_122222
 _jana_atom_site_ADP_F_122223
 _jana_atom_site_ADP_F_122233
 _jana_atom_site_ADP_F_122333
 _jana_atom_site_ADP_F_123333
 _jana_atom_site_ADP_F_133333
 _jana_atom_site_ADP_F_222222
 _jana_atom_site_ADP_F_222223
 _jana_atom_site_ADP_F_222233
 _jana_atom_site_ADP_F_222333
 _jana_atom_site_ADP_F_223333
 _jana_atom_site_ADP_F_233333
 _jana_atom_site_ADP_F_333333
 ? ? ? ? ? ? ? ? ? ? ? ? ? ? ? ? ? ? ? ? ? ? ? ? ? ? ? ? ? ?


#=======================================================================

# 10. MOLECULAR GEOMETRY


loop_
 _geom_bond_atom_site_label_1
 _geom_bond_atom_site_label_2
 _geom_bond_site_symmetry_1
 _geom_bond_site_symmetry_2
 _geom_bond_distance
 _geom_bond_publ_flag
  C1 C2 . . 1.4494(3) ?
  C1 C5 . . 1.4044(3) ?
  C1 C8 . . 1.4157(3) ?
  C2 C5 . 2_566 1.4049(3) ?
  C2 C15 . . 1.4160(3) ?
  C3 C8 . . 1.3918(3) ?
  C3 C12 . . 1.4464(3) ?
  C3 C14 . . 1.4363(3) ?
  C4 C6 . . 1.4500(3) ?
  C4 C13 . . 1.4043(3) ?
  C4 C19 . . 1.4157(3) ?
  C5 H1c5 . . 0.96 ?
  C6 C13 . 2_656 1.4040(3) ?
  C6 C21 . . 1.4152(3) ?
  C7 C12 . . 1.4368(3) ?
  C7 C17 . . 1.3676(3) ?
  C7 H1c7 . . 0.96 ?
  C8 H1c8 . . 0.96 ?
  C9 C10 . . 1.4468(3) ?
  C9 C18 . . 1.4357(3) ?
  C9 C21 . . 1.3912(3) ?
  C10 C19 . . 1.3914(3) ?
  C10 C22 . . 1.4362(3) ?
  C11 C16 . . 1.4343(3) ?
  C11 C22 . . 1.3663(3) ?
  C11 H1c11 . . 0.96 ?
  C12 C15 . . 1.3914(3) ?
  C13 H1c13 . . 0.96 ?
  C14 C20 . . 1.3671(3) ?
  C14 H1c14 . . 0.96 ?
  C15 H1c15 . . 0.96 ?
  C16 C18 . . 1.3677(3) ?
  C16 H1c16 . . 0.96 ?
  C17 C20 . . 1.4335(4) ?
  C17 H1c17 . . 0.96 ?
  C18 H1c18 . . 0.96 ?
  C19 H1c19 . . 0.96 ?
  C20 H1c20 . . 0.96 ?
  C21 H1c21 . . 0.96 ?
  C22 H1c22 . . 0.96 ?

loop_
 _geom_angle_atom_site_label_1
 _geom_angle_atom_site_label_2
 _geom_angle_atom_site_label_3
 _geom_angle_site_symmetry_1
 _geom_angle_site_symmetry_2
 _geom_angle_site_symmetry_3
 _geom_angle
 _geom_angle_publ_flag
  C2 C1 C5 . . . 119.40(2) ?
  C2 C1 C8 . . . 118.976(19) ?
  C5 C1 C8 . . . 121.63(2) ?
  C1 C2 C5 . . 2_566 119.229(19) ?
  C1 C2 C15 . . . 119.09(2) ?
  C5 C2 C15 2_566 . . 121.68(2) ?
  C8 C3 C12 . . . 119.68(2) ?
  C8 C3 C14 . . . 121.58(2) ?
  C12 C3 C14 . . . 118.735(19) ?
  C6 C4 C13 . . . 119.35(2) ?
  C6 C4 C19 . . . 119.029(18) ?
  C13 C4 C19 . . . 121.62(2) ?
  C1 C5 C2 . . 2_566 121.37(2) ?
  C1 C5 H1c5 . . . 119.31 ?
  C2 C5 H1c5 2_566 . . 119.31 ?
  C4 C6 C13 . . 2_656 119.299(18) ?
  C4 C6 C21 . . . 119.011(19) ?
  C13 C6 C21 2_656 . . 121.69(2) ?
  C12 C7 C17 . . . 120.85(2) ?
  C12 C7 H1c7 . . . 119.57 ?
  C17 C7 H1c7 . . . 119.58 ?
  C1 C8 C3 . . . 121.32(2) ?
  C1 C8 H1c8 . . . 119.34 ?
  C3 C8 H1c8 . . . 119.34 ?
  C10 C9 C18 . . . 118.63(2) ?
  C10 C9 C21 . . . 119.598(18) ?
  C18 C9 C21 . . . 121.77(2) ?
  C9 C10 C19 . . . 119.70(2) ?
  C9 C10 C22 . . . 118.826(18) ?
  C19 C10 C22 . . . 121.47(2) ?
  C16 C11 C22 . . . 120.65(2) ?
  C16 C11 H1c11 . . . 119.67 ?
  C22 C11 H1c11 . . . 119.68 ?
  C3 C12 C7 . . . 118.57(2) ?
  C3 C12 C15 . . . 119.633(19) ?
  C7 C12 C15 . . . 121.80(2) ?
  C4 C13 C6 . . 2_656 121.35(2) ?
  C4 C13 H1c13 . . . 119.32 ?
  C6 C13 H1c13 2_656 . . 119.32 ?
  C3 C14 C20 . . . 120.72(2) ?
  C3 C14 H1c14 . . . 119.64 ?
  C20 C14 H1c14 . . . 119.64 ?
  C2 C15 C12 . . . 121.29(2) ?
  C2 C15 H1c15 . . . 119.35 ?
  C12 C15 H1c15 . . . 119.35 ?
  C11 C16 C18 . . . 120.62(2) ?
  C11 C16 H1c16 . . . 119.69 ?
  C18 C16 H1c16 . . . 119.69 ?
  C7 C17 C20 . . . 120.49(2) ?
  C7 C17 H1c17 . . . 119.76 ?
  C20 C17 H1c17 . . . 119.76 ?
  C9 C18 C16 . . . 120.68(2) ?
  C9 C18 H1c18 . . . 119.66 ?
  C16 C18 H1c18 . . . 119.66 ?
  C4 C19 C10 . . . 121.29(2) ?
  C4 C19 H1c19 . . . 119.36 ?
  C10 C19 H1c19 . . . 119.36 ?
  C14 C20 C17 . . . 120.64(2) ?
  C14 C20 H1c20 . . . 119.68 ?
  C17 C20 H1c20 . . . 119.68 ?
  C6 C21 C9 . . . 121.37(2) ?
  C6 C21 H1c21 . . . 119.31 ?
  C9 C21 H1c21 . . . 119.31 ?
  C10 C22 C11 . . . 120.59(2) ?
  C10 C22 H1c22 . . . 119.7 ?
  C11 C22 H1c22 . . . 119.7 ?

loop_
 _geom_torsion_atom_site_label_1
 _geom_torsion_atom_site_label_2
 _geom_torsion_atom_site_label_3
 _geom_torsion_atom_site_label_4
 _geom_torsion_site_symmetry_1
 _geom_torsion_site_symmetry_2
 _geom_torsion_site_symmetry_3
 _geom_torsion_site_symmetry_4
 _geom_torsion
 _geom_torsion_publ_flag
 ? ? ? ? ? ? ? ? ? ?

loop_
 _geom_hbond_atom_site_label_D
 _geom_hbond_atom_site_label_H
 _geom_hbond_atom_site_label_A
 _geom_hbond_site_symmetry_D
 _geom_hbond_site_symmetry_H
 _geom_hbond_site_symmetry_A
 _geom_hbond_distance_DH
 _geom_hbond_distance_HA
 _geom_hbond_distance_DA
 _geom_hbond_angle_DHA
 _geom_hbond_publ_flag
 ? ? ? ? ? ? ? ? ? ? ?


#=======================================================================

# 11. STRUCTURE-FACTOR LIST

loop_
 _refln_index_h
 _refln_index_k
 _refln_index_l
 _refln_F_squared_calc
 _refln_F_squared_meas
 _refln_F_squared_sigma
 _refln_observed_status
   1   0   0    12.22    12.38     0.07 o
   2   0   0    34.36    32.55     0.18 o
   3   0   0     0.68     0.51     0.04 o
   4   0   0     0.02     0.22     0.05 o
   5   0   0     0.32     0.30     0.07 o
   6   0   0    65.35    64.80     0.37 o
   7   0   0    26.59    25.11     0.31 o
   8   0   0   574.59   584.70     3.47 o
   9   0   0     7.32     6.64     0.29 o
  10   0   0     4.07     4.82     0.34 o
 -10   1   0     6.68     7.74     0.38 o
  -9   1   0   156.75   159.73     1.43 o
  -8   1   0     3.71     3.59     0.27 o
  -7   1   0     2.30     2.03     0.12 o
  -6   1   0     4.20     4.13     0.10 o
  -5   1   0     0.47     0.47     0.06 o
  -4   1   0     9.35     9.71     0.11 o
  -3   1   0    69.32    73.75     0.34 o
  -2   1   0   551.19   613.33     2.17 o
  -1   1   0  8371.87  8157.51    26.18 o
   0   1   0     1.93     2.05     0.02 o
   1   1   0   971.69   977.44     5.13 o
   2   1   0    13.47    13.71     0.11 o
   4   1   0     1.79     1.56     0.07 o
   5   1   0   132.60   125.97     0.63 o
   6   1   0     1.64     1.55     0.08 o
   8   1   0     1.93     1.89     0.15 o
   9   1   0    18.60    19.45     0.29 o
  10   1   0     0.00     0.02     0.28 <
 -10   2   0    61.96    62.91     1.09 o
  -9   2   0     3.89     4.13     0.37 o
  -8   2   0     0.37     0.44     0.25 <
  -7   2   0    10.49    11.71     0.28 o
  -6   2   0     7.03     5.99     0.14 o
  -5   2   0     0.13     0.03     0.05 <
  -4   2   0    11.17    10.09     0.09 o
  -2   2   0   369.19   413.33     1.28 o
  -1   2   0     4.58     4.12     0.04 o
   0   2   0   340.89   357.50     1.39 o
   1   2   0    97.69    97.45     0.63 o
   2   2   0    53.27    53.75     0.31 o
   4   2   0    16.50    15.63     0.16 o
   5   2   0   171.08   154.71     0.88 o
   6   2   0  2191.99  2095.76    11.15 o
   7   2   0     8.36     7.79     0.17 o
   8   2   0    21.95    22.65     0.33 o
   9   2   0     0.33     0.37     0.14 <
  10   2   0     5.65     5.40     0.25 o
 -10   3   0     0.06    -0.10     0.37 <
  -9   3   0     0.05    -0.12     0.28 <
  -8   3   0     3.27     2.63     0.42 o
  -7   3   0     0.24     0.18     0.18 <
  -6   3   0     5.33     4.52     0.15 o
  -2   3   0   110.24   120.42     0.42 o
   0   3   0    46.22    47.33     0.20 o
   1   3   0    88.44    92.30     0.47 o
   2   3   0    39.35    44.75     0.31 o
   3   3   0     6.10     7.01     0.12 o
   4   3   0  1903.97  1852.40     9.80 o
   5   3   0   914.74   857.43     4.64 o
   6   3   0     1.02     0.79     0.11 o
   7   3   0     3.92     3.23     0.14 o
   8   3   0     6.36     6.37     0.18 o
   9   3   0     0.17     0.11     0.16 <
  10   3   0     7.95     8.61     0.29 o
 -10   4   0     0.01    -0.01     0.45 <
  -9   4   0     3.07     3.31     0.33 o
  -8   4   0     0.29     0.06     0.25 <
  -6   4   0     6.93     6.18     0.25 o
  -4   4   0    83.98    77.67     0.37 o
  -3   4   0     0.35     0.25     0.05 o
  -2   4   0     0.03    -0.01     0.04 <
   0   4   0    20.20    22.80     0.12 o
   1   4   0     7.77     8.68     0.07 o
   3   4   0   713.55   709.58     4.07 o
   5   4   0    47.83    44.94     0.40 o
   6   4   0     0.00    -0.04     0.11 <
   7   4   0    31.41    31.66     0.39 o
   8   4   0     0.00    -0.06     0.13 <
   9   4   0    15.73    16.14     0.33 o
  10   4   0    16.15    17.71     0.41 o
  -9   5   0     3.17     2.83     0.47 o
  -8   5   0     3.06     2.74     0.34 o
  -7   5   0   191.30   188.14     2.03 o
  -6   5   0   117.67   114.39     1.16 o
  -5   5   0    22.87    22.51     0.33 o
  -3   5   0     1.40     1.14     0.06 o
  -1   5   0     6.43     6.52     0.07 o
   0   5   0     5.57     5.43     0.06 o
   1   5   0   703.62   755.21     3.04 o
   2   5   0    13.73    12.67     0.12 o
   3   5   0     9.29     8.98     0.11 o
   4   5   0   126.68   125.24     0.82 o
   5   5   0    12.35    11.98     0.19 o
   6   5   0     1.50     1.54     0.12 o
   7   5   0     0.09     0.21     0.12 <
   8   5   0     2.47     2.65     0.20 o
   9   5   0    27.56    26.34     0.37 o
  10   5   0   456.80   472.17     4.56 o
  -7   6   0   287.74   290.20     3.51 o
  -6   6   0     0.44     0.03     0.24 <
  -5   6   0     0.02    -0.31     0.21 <
  -4   6   0     8.11     7.60     0.34 o
  -3   6   0    11.53    11.79     0.24 o
  -2   6   0    16.16    16.93     0.14 o
  -1   6   0    25.67    25.99     0.16 o
   0   6   0   296.55   330.52     1.29 o
   1   6   0     4.53     5.15     0.07 o
   2   6   0     0.47     0.53     0.06 o
   4   6   0     6.77     6.47     0.12 o
   5   6   0     0.16     0.19     0.09 <
   6   6   0     7.24     7.49     0.19 o
   7   6   0     5.18     4.83     0.20 o
   8   6   0    25.45    25.96     0.39 o
   9   6   0   398.57   412.65     3.08 o
  10   6   0     0.40     0.28     0.25 <
  -7   7   0     1.49     2.12     0.27 o
  -6   7   0     1.57     1.30     0.24 o
  -5   7   0     0.83     1.21     0.22 o
  -4   7   0     0.13    -0.10     0.22 <
  -3   7   0     5.29     5.61     0.24 o
  -2   7   0     0.49     0.42     0.10 o
  -1   7   0   380.79   373.39     1.60 o
   0   7   0   209.21   217.33     1.01 o
   1   7   0     4.43     4.62     0.07 o
   2   7   0     2.30     2.44     0.07 o
   3   7   0     3.85     3.42     0.08 o
   4   7   0    22.74    22.54     0.23 o
   5   7   0     2.97     3.14     0.12 o
   6   7   0     0.89     0.73     0.16 o
   7   7   0   143.48   141.85     1.05 o
   8   7   0    97.74    97.29     0.97 o
   9   7   0     0.52     0.60     0.28 <
  -7   8   0     1.02     1.52     0.35 o
  -6   8   0     3.62     3.71     0.29 o
  -5   8   0     4.65     4.82     0.28 o
  -4   8   0    16.19    17.43     0.52 o
  -3   8   0     3.78     3.37     0.27 o
  -2   8   0   155.22   143.84     1.04 o
  -1   8   0   269.00   270.42     1.80 o
   0   8   0     0.39     0.41     0.09 o
   1   8   0     0.62     0.69     0.07 o
   2   8   0     7.02     6.80     0.12 o
   3   8   0    16.91    17.46     0.17 o
   4   8   0     5.28     5.50     0.12 o
   5   8   0    11.45    12.55     0.21 o
   6   8   0   258.85   259.85     1.59 o
   7   8   0    46.48    45.50     0.50 o
   8   8   0     0.87     0.80     0.27 <
   9   8   0     0.00     0.07     0.28 <
  -6   9   0     1.30     1.45     0.38 o
  -5   9   0     0.86     1.46     0.23 o
  -4   9   0     1.63     1.50     0.27 o
  -3   9   0   263.66   273.51     3.28 o
  -2   9   0     0.20     0.62     0.24 <
  -1   9   0    19.50    19.22     0.28 o
   0   9   0     1.79     1.77     0.15 o
   1   9   0     3.42     3.46     0.14 o
   2   9   0     1.42     1.60     0.10 o
   3   9   0     1.78     1.49     0.11 o
   4   9   0    57.30    59.71     0.50 o
   5   9   0    75.82    71.78     0.63 o
   6   9   0    11.57    12.01     0.24 o
   7   9   0     2.37     2.19     0.24 o
   8   9   0     0.14     0.21     0.28 <
  -4  10   0   131.42   133.46     2.53 o
  -3  10   0     4.64     4.32     0.36 o
  -2  10   0     0.62     0.61     0.22 <
  -1  10   0     4.54     4.04     0.34 o
   0  10   0     0.53     0.64     0.16 o
   1  10   0     9.74     9.55     0.22 o
   2  10   0     2.61     2.42     0.21 o
   3  10   0    12.51    12.97     0.23 o
   4  10   0    60.89    58.28     0.51 o
   5  10   0    27.55    26.41     0.34 o
   6  10   0     1.22     1.13     0.20 o
   7  10   0     0.00    -0.12     0.26 <
  -2  11   0     2.18     2.37     0.52 o
  -1  11   0     0.02    -0.01     0.31 <
   0  11   0     9.56     8.46     0.44 o
   1  11   0     0.30     0.02     0.22 <
   2  11   0     7.96     8.44     0.27 o
   3  11   0    65.38    62.63     0.75 o
   4  11   0     0.54     0.26     0.15 <
   5  11   0     8.52     8.31     0.27 o
   6  11   0     4.21     3.81     0.27 o
  -2  12   0     0.00     0.33     0.50 <
  -1  12   0     1.65     2.08     0.51 o
   0  12   0    17.89    18.54     0.62 o
   1  12   0    51.93    51.18     0.79 o
   2  12   0    26.67    25.81     0.54 o
   3  12   0     0.37     0.27     0.20 <
   4  12   0     0.24     0.24     0.23 <
   5  12   0     4.73     5.00     0.32 o
  -4 -12   1     0.07     0.21     0.24 <
  -3 -12   1     1.34     1.40     0.25 o
  -2 -12   1     3.79     3.80     0.29 o
  -1 -12   1     1.94     1.74     0.27 o
   0 -12   1   123.82   125.31     1.88 o
   1 -12   1    35.01    37.94     0.90 o
   2 -12   1     1.53     2.03     0.56 o
  -6 -11   1     1.51     1.94     0.25 o
  -5 -11   1     1.25     1.26     0.19 o
  -4 -11   1     0.21     0.24     0.16 <
  -3 -11   1     2.36     2.48     0.21 o
  -2 -11   1     8.62     9.30     0.34 o
  -1 -11   1   154.29   149.95     1.64 o
   0 -11   1    24.08    23.57     0.65 o
   1 -11   1     0.20     0.10     0.31 <
   2 -11   1     0.68     0.60     0.46 <
  -7 -10   1     0.22     0.11     0.27 <
  -6 -10   1     0.01    -0.19     0.19 <
  -5 -10   1    23.34    23.51     0.31 o
  -4 -10   1     0.33     0.41     0.13 o
  -3 -10   1     4.20     4.46     0.16 o
  -2 -10   1   302.73   292.22     2.82 o
  -1 -10   1    15.15    15.73     0.47 o
   0 -10   1     0.18     0.29     0.16 <
   1 -10   1     2.66     2.46     0.31 o
   2 -10   1     0.03     0.13     0.21 <
   3 -10   1     6.07     5.91     0.40 o
   4 -10   1     3.70     3.29     0.37 o
  -8  -9   1     0.03     0.16     0.28 <
  -7  -9   1     0.00     0.12     0.22 <
  -6  -9   1     6.66     7.45     0.22 o
  -5  -9   1    14.34    13.23     0.25 o
  -4  -9   1   422.92   426.99     2.44 o
  -3  -9   1     2.36     1.72     0.13 o
  -2  -9   1     0.67     0.83     0.10 o
  -1  -9   1     7.44     7.47     0.18 o
   0  -9   1     0.19     0.45     0.13 o
   1  -9   1     2.61     2.52     0.19 o
   2  -9   1     0.73     1.05     0.23 o
   3  -9   1     0.74     0.54     0.23 <
   4  -9   1     0.00     0.49     0.25 <
   5  -9   1    29.01    31.34     0.60 o
   6  -9   1     0.61     0.59     0.36 <
  -9  -8   1     0.18     0.28     0.28 <
  -8  -8   1     0.24     0.19     0.27 <
  -7  -8   1     1.71     1.61     0.17 o
  -6  -8   1    22.59    22.16     0.33 o
  -5  -8   1   392.53   410.38     2.22 o
  -4  -8   1   136.37   136.34     0.75 o
  -3  -8   1    17.39    17.41     0.18 o
  -2  -8   1     6.30     6.17     0.11 o
  -1  -8   1     0.06     0.00     0.07 <
   0  -8   1     0.21     0.25     0.09 <
   1  -8   1    47.40    47.48     0.47 o
   2  -8   1    14.51    14.22     0.28 o
   3  -8   1     0.27    -0.03     0.18 <
   4  -8   1   273.71   277.59     3.36 o
   5  -8   1     1.85     2.11     0.24 o
   6  -8   1     5.75     6.17     0.42 o
  -9  -7   1     0.12    -0.01     0.27 <
  -8  -7   1     3.56     3.58     0.21 o
  -7  -7   1   103.72    99.39     0.81 o
  -5  -7   1     0.00     0.04     0.09 <
  -4  -7   1    18.06    17.96     0.18 o
  -3  -7   1     0.00    -0.02     0.06 <
  -2  -7   1     0.23     0.30     0.06 o
  -1  -7   1     4.03     4.05     0.07 o
   0  -7   1    20.60    21.34     0.18 o
   1  -7   1   190.08   187.81     0.88 o
   2  -7   1   792.87   796.54     4.97 o
   3  -7   1    35.27    36.34     0.56 o
   4  -7   1     0.00    -0.10     0.23 <
   5  -7   1     0.04     0.58     0.22 <
   6  -7   1     0.63     1.13     0.24 o
   7  -7   1     0.62     0.74     0.25 <
 -10  -6   1     0.07    -0.15     0.25 <
  -9  -6   1     1.34     0.71     0.28 <
  -8  -6   1     0.01     0.15     0.16 <
  -7  -6   1    22.08    24.85     0.37 o
  -6  -6   1     5.31     5.23     0.16 o
  -5  -6   1     5.39     4.88     0.14 o
  -4  -6   1     0.60     0.56     0.08 o
  -2  -6   1     6.19     6.00     0.08 o
  -1  -6   1     0.67     0.71     0.05 o
   0  -6   1   104.20   113.30     0.52 o
   1  -6   1   464.77   477.97     1.68 o
   2  -6   1    34.47    33.81     0.23 o
   3  -6   1    25.84    27.21     0.34 o
   4  -6   1     0.24     0.17     0.18 <
   5  -6   1     0.06    -0.02     0.22 <
   6  -6   1     4.30     3.53     0.29 o
   7  -6   1    13.19    14.12     0.47 o
 -10  -5   1     9.15     8.39     0.42 o
  -9  -5   1    16.41    15.31     0.29 o
  -8  -5   1     4.81     5.08     0.18 o
  -7  -5   1     0.97     0.90     0.13 o
  -6  -5   1     0.08     0.19     0.12 <
  -5  -5   1     8.70     8.25     0.20 o
  -4  -5   1    36.94    36.98     0.36 o
  -3  -5   1     1.07     1.14     0.06 o
  -2  -5   1     5.52     4.84     0.08 o
  -1  -5   1  1596.01  1724.87     7.44 o
   1  -5   1     6.26     6.34     0.07 o
   2  -5   1    15.51    14.63     0.11 o
   3  -5   1     1.41     1.15     0.07 o
   4  -5   1     0.00     0.00     0.11 <
   5  -5   1    10.29     9.95     0.22 o
   6  -5   1     5.05     5.57     0.26 o
   7  -5   1   216.94   214.74     1.97 o
   8  -5   1   381.72   395.76     3.96 o
   9  -5   1     3.96     4.46     0.52 o
 -10  -4   1   200.26   205.00     1.99 o
  -9  -4   1    82.88    81.69     0.71 o
  -8  -4   1     0.97     1.05     0.13 o
  -7  -4   1    17.12    17.36     0.25 o
  -6  -4   1     0.65     0.68     0.12 o
  -5  -4   1     6.52     6.29     0.14 o
  -4  -4   1     0.21     0.02     0.08 <
  -2  -4   1   474.18   525.24     3.25 o
  -1  -4   1    78.93    84.35     0.39 o
   0  -4   1    65.32    70.31     0.29 o
   1  -4   1    52.42    56.71     0.24 o
   3  -4   1     6.75     6.73     0.08 o
   4  -4   1    24.04    21.78     0.18 o
   7  -4   1   212.68   198.31     3.64 o
   8  -4   1     0.00    -0.06     0.25 <
   9  -4   1     3.07     2.05     0.45 o
 -10  -3   1    30.95    31.02     0.46 o
  -9  -3   1     0.22     0.22     0.17 <
  -8  -3   1     5.42     5.06     0.17 o
  -7  -3   1     3.87     3.14     0.16 o
  -6  -3   1     6.04     5.82     0.16 o
  -5  -3   1    80.29    76.05     0.53 o
  -4  -3   1   432.07   429.20     2.52 o
  -3  -3   1   630.18   710.34     5.37 o
  -2  -3   1   282.02   294.74     1.71 o
  -1  -3   1   114.00   117.71     0.59 o
   0  -3   1    33.97    33.56     0.14 o
   1  -3   1     0.07     0.05     0.03 <
   2  -3   1    35.72    34.46     0.16 o
   3  -3   1    32.81    35.00     0.16 o
   6  -3   1    45.74    40.73     0.37 o
   7  -3   1     0.01     0.14     0.16 <
   8  -3   1     2.04     1.40     0.26 o
   9  -3   1     0.01     0.30     0.27 <
  10  -3   1     0.01     0.04     0.37 <
 -10  -2   1     7.62     7.84     0.28 o
  -9  -2   1     1.13     1.09     0.17 o
  -8  -2   1     5.18     5.54     0.16 o
  -7  -2   1     8.81     8.61     0.21 o
  -6  -2   1    39.29    37.75     0.29 o
  -3  -2   1     0.68     0.34     0.08 o
  -2  -2   1   117.29   120.26     0.64 o
   0  -2   1   281.14   291.26     1.01 o
   1  -2   1    27.99    29.90     0.12 o
   2  -2   1    17.98    19.65     0.09 o
   4  -2   1   522.69   537.52     1.89 o
   7  -2   1     4.21     5.05     0.19 o
   8  -2   1     0.21     0.41     0.25 <
   9  -2   1     6.54     6.66     0.34 o
  10  -2   1     3.44     3.59     0.41 o
 -10  -1   1     0.05    -0.13     0.28 <
  -9  -1   1     5.21     5.37     0.19 o
  -8  -1   1     0.31     0.28     0.13 <
  -7  -1   1     1.91     2.27     0.12 o
  -6  -1   1     1.84     1.91     0.09 o
  -5  -1   1  2313.65  2188.62     9.45 o
  -4  -1   1     0.08     0.08     0.06 <
  -3  -1   1    67.21    73.32     0.48 o
  -2  -1   1     0.35     0.33     0.04 o
  -1  -1   1   619.30   624.98     3.30 o
   0  -1   1     9.29     9.92     0.06 o
   1  -1   1   134.26   131.92     0.44 o
   4  -1   1     2.41     2.68     0.06 o
   6  -1   1     0.05     0.12     0.07 <
   7  -1   1     1.57     1.36     0.11 o
   8  -1   1     4.40     3.62     0.33 o
   9  -1   1     1.95     2.12     0.24 o
  10  -1   1     5.67     7.25     0.32 o
 -10   0   1     3.63     4.35     0.36 o
  -9   0   1     1.09     0.81     0.26 o
  -8   0   1    70.12    70.26     0.63 o
  -7   0   1   343.92   334.77     1.83 o
  -6   0   1   687.67   666.78     3.10 o
  -5   0   1     1.32     1.32     0.06 o
  -3   0   1     3.12     2.93     0.06 o
  -2   0   1    25.13    26.61     0.14 o
  -1   0   1    22.63    22.44     0.13 o
   0   0   1  1176.20  1134.04    11.88 o
   1   0   1     6.28     6.52     0.04 o
   2   0   1  1509.84  1505.09     6.47 o
   3   0   1     0.00     0.02     0.04 <
   5   0   1     0.21     0.18     0.07 <
   6   0   1    17.84    17.49     0.17 o
   7   0   1     4.27     4.21     0.11 o
   8   0   1    15.30    14.80     0.25 o
   9   0   1    35.86    34.53     0.54 o
  10   0   1    14.33    14.44     0.39 o
 -10   1   1     0.34     0.57     0.35 <
  -9   1   1    58.99    59.68     0.73 o
  -8   1   1    61.93    65.78     0.89 o
  -7   1   1     0.37     0.27     0.11 <
  -6   1   1    24.46    24.52     0.23 o
  -5   1   1    12.06    11.16     0.13 o
  -4   1   1    12.73    12.89     0.11 o
  -2   1   1   132.74   141.77     0.51 o
  -1   1   1  1455.65  1497.32     4.88 o
   1   1   1  2263.44  2304.12    13.94 o
   2   1   1    61.29    66.00     0.46 o
   4   1   1     4.57     4.34     0.09 o
   5   1   1    21.49    20.84     0.20 o
   6   1   1     0.10     0.10     0.07 <
   7   1   1    16.58    15.84     0.18 o
   8   1   1     0.34     0.35     0.12 <
   9   1   1   118.54   122.04     0.83 o
  10   1   1     0.00    -0.06     0.27 <
 -10   2   1    86.50    84.69     1.29 o
  -9   2   1    82.41    80.83     1.20 o
  -8   2   1     0.27     0.38     0.25 <
  -7   2   1    33.53    33.67     0.41 o
  -6   2   1     7.98     7.64     0.18 o
  -3   2   1    15.35    17.32     0.10 o
  -1   2   1 11892.30 11649.30    35.29 o
   0   2   1   430.39   456.71     1.83 o
   1   2   1   572.13   582.28     3.54 o
   2   2   1    14.32    15.05     0.14 o
   3   2   1    23.87    22.16     0.17 o
   5   2   1     1.51     1.30     0.08 o
   6   2   1   440.05   431.42     2.04 o
   7   2   1   381.38   372.42     2.13 o
   8   2   1    80.03    80.85     0.62 o
   9   2   1     0.66     0.82     0.16 o
  10   2   1     3.23     3.29     0.32 o
 -10   3   1     6.60     5.43     0.57 o
  -9   3   1     0.43     0.72     0.34 <
  -8   3   1     2.50     2.65     0.42 o
  -7   3   1     1.40     1.37     0.21 o
  -6   3   1     0.00     0.03     0.12 <
  -3   3   1   217.22   241.70     0.86 o
  -1   3   1    19.98    19.17     0.09 o
   0   3   1    26.46    27.39     0.13 o
   1   3   1    90.79    98.34     0.53 o
   2   3   1     0.58     0.25     0.05 o
   4   3   1     4.92     4.64     0.09 o
   5   3   1   985.29   925.39     4.42 o
   6   3   1   330.40   347.58     2.13 o
   7   3   1     2.33     2.01     0.11 o
   8   3   1     5.99     5.94     0.17 o
   9   3   1     1.41     1.28     0.16 o
  10   3   1     2.65     2.70     0.23 o
 -10   4   1     2.21     1.21     0.46 <
  -9   4   1     3.30     3.93     0.33 o
  -8   4   1     1.85     1.99     0.33 o
  -7   4   1     7.26     7.98     0.58 o
  -6   4   1     4.37     3.97     0.17 o
  -4   4   1   516.02   462.18     1.76 o
  -3   4   1     0.09     0.11     0.05 <
  -2   4   1     2.78     3.06     0.05 o
   1   4   1     6.15     5.41     0.06 o
   2   4   1     0.28     0.24     0.04 o
   3   4   1     0.05     0.30     0.06 o
   5   4   1   441.58   416.75     2.06 o
   6   4   1     5.49     5.61     0.17 o
   7   4   1    51.08    49.67     0.46 o
   8   4   1     0.01    -0.01     0.12 <
   9   4   1     7.57     7.28     0.24 o
  10   4   1     2.70     2.40     0.26 o
  -9   5   1     1.83     1.58     0.44 o
  -8   5   1     0.37     0.45     0.30 <
  -7   5   1     4.69     5.10     0.46 o
  -6   5   1    13.28    12.55     0.34 o
  -5   5   1   707.45   672.97     4.29 o
  -3   5   1     0.02    -0.01     0.06 <
  -2   5   1    22.91    21.13     0.12 o
  -1   5   1     2.21     2.13     0.04 o
   0   5   1     5.07     5.40     0.06 o
   1   5   1    65.98    73.21     0.36 o
   2   5   1    32.09    36.44     0.26 o
   3   5   1   292.60   260.68     1.24 o
   4   5   1   694.59   686.02     3.31 o
   5   5   1    10.05     8.84     0.17 o
   6   5   1     2.91     2.83     0.13 o
   7   5   1     0.91     0.89     0.13 o
   8   5   1     6.42     6.40     0.22 o
   9   5   1     3.95     3.82     0.19 o
  10   5   1    44.52    45.46     0.70 o
  -8   6   1     0.01    -0.37     0.48 <
  -7   6   1   208.05   209.86     2.66 o
  -6   6   1    39.71    37.13     0.75 o
  -5   6   1     0.53     1.06     0.23 o
  -4   6   1    29.13    26.65     0.48 o
  -3   6   1    12.16    12.31     0.28 o
  -2   6   1    10.91    11.86     0.11 o
  -1   6   1    13.62    15.04     0.10 o
   1   6   1     0.47     0.73     0.06 o
   3   6   1    20.22    21.35     0.19 o
   4   6   1    11.86    10.68     0.13 o
   5   6   1     1.61     1.25     0.09 o
   6   6   1     7.92     7.94     0.18 o
   7   6   1    12.28    12.31     0.26 o
   8   6   1     3.32     3.39     0.18 o
   9   6   1   104.20   106.37     0.93 o
  10   6   1    27.78    31.49     0.83 o
  -7   7   1   141.92   150.72     1.73 o
  -6   7   1     0.03    -0.04     0.28 <
  -5   7   1     2.59     2.96     0.24 o
  -4   7   1     0.16     0.16     0.16 <
  -3   7   1     1.41     1.27     0.21 o
  -2   7   1     0.01    -0.03     0.08 <
  -1   7   1     0.35     0.37     0.05 o
   0   7   1   264.44   268.96     1.10 o
   1   7   1   577.67   606.53     2.58 o
   2   7   1     1.42     1.59     0.07 o
   3   7   1    13.20    12.12     0.15 o
   4   7   1    27.51    27.50     0.25 o
   5   7   1     4.87     4.59     0.13 o
   6   7   1     1.30     1.65     0.15 o
   7   7   1     0.14     0.13     0.14 <
   8   7   1    65.20    63.19     0.65 o
   9   7   1   155.84   157.68     1.79 o
  -7   8   1     3.57     3.70     0.39 o
  -6   8   1     3.64     3.70     0.28 o
  -5   8   1     8.34     7.63     0.31 o
  -4   8   1     2.19     2.60     0.27 o
  -3   8   1     0.52     0.44     0.21 <
  -2   8   1    12.99    13.13     0.28 o
  -1   8   1   995.22  1019.57     5.47 o
   0   8   1     1.62     1.80     0.08 o
   1   8   1     0.47     0.34     0.06 o
   2   8   1     9.25     9.47     0.14 o
   3   8   1    20.67    21.20     0.19 o
   4   8   1     0.12     0.14     0.10 <
   5   8   1     2.98     3.24     0.16 o
   6   8   1    14.71    14.34     0.26 o
   7   8   1    78.51    78.09     0.68 o
   8   8   1    36.51    38.64     0.71 o
   9   8   1     0.85     0.40     0.30 <
  -6   9   1     3.69     4.06     0.44 o
  -5   9   1     0.09     0.24     0.20 <
  -4   9   1     0.38     0.19     0.18 <
  -3   9   1    23.19    24.52     0.59 o
  -2   9   1    46.48    47.10     1.06 o
  -1   9   1    80.98    78.48     0.69 o
   0   9   1    38.50    37.17     0.38 o
   1   9   1     1.47     1.38     0.12 o
   2   9   1     7.40     7.65     0.14 o
   3   9   1     2.93     2.72     0.11 o
   4   9   1    12.36    12.20     0.19 o
   5   9   1     0.80     0.71     0.13 o
   6   9   1    60.17    62.27     0.54 o
   7   9   1    14.71    14.19     0.32 o
   8   9   1     7.63     8.33     0.39 o
  -4  10   1    46.65    52.10     1.00 o
  -3  10   1    91.32    90.93     1.82 o
  -2  10   1     4.13     4.32     0.31 o
  -1  10   1    26.58    23.80     0.62 o
   0  10   1     0.63     0.68     0.17 o
   1  10   1     3.70     3.84     0.18 o
   2  10   1     1.17     1.30     0.17 o
   3  10   1     1.91     1.86     0.13 o
   4  10   1     5.54     4.78     0.17 o
   5  10   1   761.01   764.28     4.25 o
   6  10   1     7.87     7.82     0.23 o
   7  10   1     4.00     3.88     0.33 o
  -2  11   1     5.20     5.27     0.57 o
  -1  11   1     0.14    -0.04     0.42 <
   0  11   1     2.86     2.80     0.33 o
   1  11   1     0.11    -0.12     0.22 <
   2  11   1     1.40     1.47     0.19 o
   3  11   1    34.60    35.06     0.48 o
   4  11   1   106.47   112.16     0.81 o
   5  11   1    13.95    13.39     0.25 o
   6  11   1    15.21    14.81     0.39 o
  -1  12   1     1.32     1.37     0.49 <
   0  12   1     1.79     2.23     0.50 o
   1  12   1     3.88     3.90     0.29 o
   2  12   1    31.37    30.46     0.59 o
   3  12   1    33.79    33.47     0.52 o
   4  12   1     0.02     0.06     0.23 <
   5  12   1    12.00    11.98     0.41 o
   0  13   1     6.57     6.76     0.69 o
   1  13   1    35.85    35.69     0.80 o
   2  13   1     2.50     2.31     0.28 o
  -4 -12   2     0.75     0.32     0.21 <
  -3 -12   2     3.95     3.84     0.30 o
  -2 -12   2     1.38     1.71     0.27 o
  -1 -12   2     0.87     1.08     0.25 o
   0 -12   2     1.25     0.98     0.35 <
   1 -12   2   134.01   133.72     1.99 o
   2 -12   2   116.82   115.99     2.55 o
  -6 -11   2     0.11     0.21     0.23 <
  -5 -11   2     0.52     0.34     0.23 <
  -4 -11   2     1.90     1.79     0.18 o
  -3 -11   2     0.00    -0.16     0.18 <
  -2 -11   2     0.76     0.86     0.23 o
  -1 -11   2    10.05     9.83     0.35 o
   0 -11   2     0.00     0.22     0.31 <
   1 -11   2     3.10     3.13     0.36 o
   2 -11   2     3.26     3.45     0.39 o
  -7 -10   2     0.35     0.06     0.27 <
  -6 -10   2     0.06     0.01     0.22 <
  -5 -10   2     7.88     7.81     0.21 o
  -4 -10   2     3.95     3.86     0.15 o
  -3 -10   2     0.05     0.07     0.12 <
  -2 -10   2   119.84   108.39     1.24 o
  -1 -10   2    31.89    33.50     0.58 o
   0 -10   2     0.42     0.67     0.17 o
   1 -10   2    11.63    12.34     0.48 o
   2 -10   2     0.35     0.12     0.29 <
   3 -10   2     3.24     3.08     0.33 o
   4 -10   2     0.71     0.58     0.28 <
  -8  -9   2     0.00    -0.32     0.30 <
  -7  -9   2     1.07     1.49     0.28 o
  -6  -9   2     4.87     5.22     0.20 o
  -5  -9   2    17.88    16.61     0.26 o
  -4  -9   2     2.58     2.62     0.13 o
  -2  -9   2     0.80     0.64     0.10 o
  -1  -9   2    15.40    14.50     0.23 o
   0  -9   2     0.95     0.92     0.17 o
   1  -9   2     0.00     0.16     0.16 <
   2  -9   2     0.89     0.54     0.22 <
   3  -9   2     3.66     3.60     0.29 o
   4  -9   2     0.02     0.24     0.25 <
   5  -9   2     7.69     8.70     0.34 o
  -8  -8   2     0.19    -0.06     0.27 <
  -7  -8   2     0.33     0.14     0.17 <
  -6  -8   2     6.25     6.49     0.19 o
  -5  -8   2     3.53     3.31     0.14 o
  -4  -8   2   411.50   414.96     2.11 o
  -3  -8   2   152.38   143.28     0.86 o
  -2  -8   2     1.85     1.78     0.08 o
  -1  -8   2     2.09     1.98     0.09 o
   0  -8   2     1.09     1.07     0.10 o
   1  -8   2     9.84    10.08     0.20 o
   2  -8   2     7.92     6.80     0.21 o
   3  -8   2     2.92     3.20     0.27 o
   4  -8   2   373.75   379.11     4.41 o
   5  -8   2    10.49    11.85     0.37 o
   6  -8   2     5.22     6.23     0.33 o
  -9  -7   2     0.86     0.90     0.28 o
  -8  -7   2     1.13     1.30     0.22 o
  -7  -7   2    19.45    19.42     0.29 o
  -5  -7   2     3.65     3.13     0.12 o
  -4  -7   2   110.04   103.42     0.59 o
  -3  -7   2     0.73     0.93     0.07 o
  -2  -7   2     0.20     0.02     0.06 <
  -1  -7   2    12.75    12.40     0.12 o
   0  -7   2     7.30     7.64     0.13 o
   1  -7   2    55.44    53.89     0.34 o
   2  -7   2    20.31    19.08     0.24 o
   3  -7   2   164.69   174.80     1.54 o
   4  -7   2     6.84     5.36     0.32 o
   5  -7   2     0.00     0.13     0.21 <
   6  -7   2     0.01     0.18     0.22 <
   7  -7   2     2.90     3.40     0.39 o
  -9  -6   2     0.03    -0.06     0.26 <
  -8  -6   2     1.20     1.16     0.17 o
  -7  -6   2     0.06    -0.06     0.14 <
  -6  -6   2   471.76   482.89     2.75 o
  -5  -6   2    27.73    25.45     0.28 o
  -4  -6   2     1.25     1.50     0.09 o
  -3  -6   2     7.71     8.49     0.12 o
  -2  -6   2    12.92    12.77     0.13 o
  -1  -6   2     4.01     3.94     0.07 o
   1  -6   2    86.97    88.57     0.37 o
   2  -6   2   494.25   450.43     1.77 o
   3  -6   2   130.85   134.61     1.22 o
   4  -6   2     6.27     7.10     0.27 o
   5  -6   2     0.20     0.03     0.19 <
   6  -6   2     8.49     7.82     0.32 o
   7  -6   2     2.52     2.34     0.37 o
 -10  -5   2     9.53     9.48     0.43 o
  -9  -5   2     0.35     0.29     0.17 <
  -8  -5   2     0.01     0.01     0.13 <
  -7  -5   2   193.02   187.92     1.29 o
  -6  -5   2     1.94     1.53     0.11 o
  -5  -5   2     3.75     3.58     0.13 o
  -4  -5   2    14.42    13.60     0.21 o
  -3  -5   2     0.21     0.11     0.06 <
  -1  -5   2    42.89    45.73     0.29 o
   0  -5   2    54.31    51.67     0.26 o
   2  -5   2    49.06    48.30     0.22 o
   3  -5   2     0.15     0.11     0.07 <
   4  -5   2     0.00     0.08     0.12 <
   5  -5   2     4.00     3.33     0.17 o
   6  -5   2     3.26     3.70     0.23 o
   7  -5   2     4.57     5.51     0.35 o
   8  -5   2   132.51   129.53     1.64 o
   9  -5   2    61.97    62.21     1.35 o
 -10  -4   2     0.66     0.28     0.29 <
  -9  -4   2   223.47   228.78     1.56 o
  -8  -4   2    68.00    69.32     0.68 o
  -7  -4   2     3.84     3.78     0.16 o
  -6  -4   2     4.02     3.54     0.16 o
  -5  -4   2     0.46     0.39     0.10 o
  -4  -4   2     0.69     0.60     0.08 o
  -3  -4   2     0.08     0.01     0.08 <
  -1  -4   2     5.13     5.28     0.06 o
   0  -4   2   601.15   662.89     2.50 o
   1  -4   2    44.78    46.07     0.22 o
   2  -4   2     0.05     0.05     0.04 <
   3  -4   2    28.48    29.65     0.18 o
   4  -4   2    13.16    11.92     0.15 o
   5  -4   2    11.07     9.95     0.19 o
   6  -4   2     0.88     0.69     0.17 o
   7  -4   2   280.93   272.11     3.29 o
   8  -4   2    85.23    91.46     1.27 o
   9  -4   2     2.13     2.06     0.45 o
 -10  -3   2   120.60   123.01     1.19 o
  -9  -3   2    18.35    19.51     0.39 o
  -8  -3   2     1.06     0.90     0.16 o
  -7  -3   2     7.30     6.68     0.17 o
  -6  -3   2     1.76     2.20     0.11 o
  -5  -3   2    18.40    17.51     0.20 o
  -4  -3   2    74.65    75.34     0.54 o
  -3  -3   2    55.01    53.79     0.43 o
  -2  -3   2   728.99   752.42     4.00 o
  -1  -3   2   305.57   324.83     1.32 o
   1  -3   2     0.01     0.03     0.03 <
   2  -3   2    33.86    31.59     0.16 o
   3  -3   2    18.60    17.58     0.11 o
   5  -3   2     0.40     0.14     0.06 <
   7  -3   2     7.90     7.32     0.24 o
   8  -3   2     0.69     0.52     0.26 <
   9  -3   2     0.29     0.43     0.27 <
  10  -3   2     0.57     0.91     0.45 <
 -10  -2   2    25.72    24.84     0.47 o
  -9  -2   2     1.08     0.89     0.18 o
  -8  -2   2     0.00     0.03     0.13 <
  -7  -2   2     4.31     4.13     0.12 o
  -6  -2   2     0.22     0.21     0.09 <
  -5  -2   2     9.28     8.54     0.14 o
  -4  -2   2     0.25     0.25     0.07 o
  -3  -2   2   216.60   227.29     1.47 o
  -2  -2   2   332.97   348.96     1.85 o
  -1  -2   2    16.20    18.03     0.13 o
   0  -2   2   228.33   234.46     0.92 o
   1  -2   2    40.97    42.65     0.18 o
   3  -2   2     2.75     2.42     0.05 o
   7  -2   2     5.75     5.93     0.21 o
   8  -2   2     0.06     0.16     0.18 <
   9  -2   2     7.20     7.30     0.30 o
  10  -2   2     2.28     2.42     0.38 o
 -10  -1   2     0.17     0.04     0.34 <
  -9  -1   2     0.99     0.95     0.17 o
  -8  -1   2     0.11     0.21     0.12 <
  -7  -1   2     0.14     0.08     0.10 <
  -6  -1   2     1.49     1.34     0.08 o
  -5  -1   2  1610.26  1540.45     7.32 o
  -4  -1   2     4.34     4.26     0.10 o
  -3  -1   2   133.03   142.71     0.74 o
  -2  -1   2     3.12     3.24     0.06 o
  -1  -1   2   356.92   358.97     1.81 o
   0  -1   2    12.83    12.55     0.07 o
   1  -1   2    64.63    61.64     0.23 o
   7  -1   2     0.03     0.05     0.10 <
   8  -1   2     4.13     4.45     0.34 o
   9  -1   2     2.19     2.42     0.22 o
  10  -1   2     0.02    -0.12     0.24 <
 -10   0   2     4.72     5.13     0.34 o
  -9   0   2     0.01    -0.05     0.26 <
  -8   0   2    17.81    18.35     0.29 o
  -7   0   2     1.71     1.81     0.11 o
  -6   0   2  2012.88  1921.41     8.01 o
  -5   0   2    62.34    55.42     0.34 o
  -4   0   2    21.00    21.41     0.19 o
  -3   0   2     4.89     4.67     0.07 o
  -2   0   2   125.18   129.23     0.57 o
  -1   0   2    13.81    13.39     0.08 o
   0   0   2   843.74   843.77     5.12 o
   1   0   2     0.91     0.92     0.03 o
   2   0   2  2486.10  2547.66    11.40 o
   3   0   2     0.92     1.11     0.04 o
   5   0   2     0.30     0.24     0.06 o
   6   0   2     9.42     8.42     0.11 o
   7   0   2     1.75     1.67     0.10 o
   8   0   2     9.21     8.89     0.21 o
   9   0   2     0.29     0.38     0.19 <
  10   0   2     0.35     0.46     0.24 <
 -10   1   2     0.14     0.38     0.34 <
  -9   1   2     9.08     9.31     0.32 o
  -8   1   2     8.76     8.87     0.33 o
  -7   1   2    40.49    36.37     0.33 o
  -6   1   2   207.26   211.89     1.07 o
  -5   1   2    75.66    72.62     0.37 o
  -4   1   2     8.65     9.10     0.08 o
  -2   1   2    55.17    57.39     0.23 o
  -1   1   2   606.08   625.23     2.09 o
   0   1   2     0.77     0.88     0.02 o
   1   1   2  7235.88  7398.97    36.51 o
   2   1   2   437.13   489.61     2.79 o
   3   1   2    61.57    65.46     0.36 o
   4   1   2     8.09     8.13     0.10 o
   5   1   2     0.76     0.73     0.06 o
   6   1   2     0.59     0.66     0.07 o
   7   1   2    12.27    11.34     0.17 o
   8   1   2     1.13     1.19     0.13 o
   9   1   2   178.39   192.70     1.18 o
  10   1   2     0.19     0.34     0.28 <
 -10   2   2     5.68     6.30     0.43 o
  -9   2   2    20.62    22.40     0.51 o
  -7   2   2   197.17   197.79     1.44 o
  -6   2   2    15.45    15.50     0.23 o
  -5   2   2     0.15     0.33     0.06 o
  -4   2   2     0.16    -0.01     0.05 <
  -3   2   2    37.29    36.77     0.17 o
  -2   2   2     5.83     6.28     0.05 o
  -1   2   2  1801.04  1879.51     5.62 o
   0   2   2 18094.50 17119.60    63.66 o
   1   2   2  3005.07  3072.45    16.13 o
   2   2   2     0.06     0.11     0.05 <
   3   2   2    33.73    32.42     0.28 o
   5   2   2     1.47     1.77     0.06 o
   6   2   2    43.79    44.55     0.30 o
   7   2   2    39.46    37.86     0.35 o
   8   2   2   541.19   551.89     2.93 o
   9   2   2    26.11    25.23     0.34 o
  10   2   2     2.99     3.09     0.31 o
 -10   3   2     5.00     5.75     0.45 o
  -9   3   2    51.07    48.52     0.91 o
  -8   3   2     0.41     0.20     0.37 <
  -7   3   2     2.91     2.51     0.19 o
  -6   3   2     6.19     6.70     0.18 o
  -5   3   2     9.26     8.31     0.08 o
  -3   3   2     4.31     4.09     0.05 o
  -1   3   2  1875.22  2022.97     6.18 o
   0   3   2     7.32     7.57     0.06 o
   1   3   2   191.46   207.31     1.06 o
   2   3   2    51.38    52.07     0.33 o
   4   3   2     7.76     7.66     0.11 o
   5   3   2    60.54    57.07     0.39 o
   6   3   2   116.34   117.43     0.71 o
   7   3   2    40.64    36.11     0.32 o
   8   3   2     6.80     6.20     0.17 o
   9   3   2     9.49    10.14     0.21 o
  10   3   2     0.83     1.16     0.21 o
 -10   4   2   152.79   154.24     1.96 o
  -9   4   2     3.30     3.56     0.39 o
  -8   4   2     4.94     4.72     0.37 o
  -7   4   2     9.93    11.25     0.33 o
  -6   4   2     3.42     3.06     0.16 o
  -5   4   2     0.02     0.10     0.08 <
  -4   4   2     0.13     0.10     0.05 <
  -2   4   2   371.12   390.50     1.56 o
  -1   4   2     0.06     0.05     0.03 <
   1   4   2    58.70    60.54     0.37 o
   2   4   2     2.14     2.15     0.06 o
   5   4   2   335.08   327.53     1.75 o
   6   4   2   337.29   330.38     2.04 o
   7   4   2    52.35    50.84     0.43 o
   8   4   2     0.10    -0.04     0.12 <
   9   4   2     1.75     1.88     0.16 o
  10   4   2     0.50     0.71     0.24 <
  -9   5   2     0.53     0.46     0.65 <
  -8   5   2     0.26     0.27     0.32 <
  -7   5   2     0.00     0.10     0.36 <
  -6   5   2     2.97     3.22     0.20 o
  -5   5   2    45.42    45.91     0.53 o
  -4   5   2     1.09     0.38     0.12 o
  -2   5   2    79.34    80.79     0.39 o
   3   5   2    27.89    27.71     0.22 o
   4   5   2  2143.95  2103.11    10.52 o
   6   5   2     0.01    -0.04     0.11 <
   7   5   2     8.79     8.89     0.20 o
   8   5   2     8.94     9.11     0.24 o
   9   5   2     0.29     0.53     0.14 o
  10   5   2     9.65     9.74     0.50 o
  -8   6   2     0.37    -0.66     0.50 <
  -7   6   2    15.85    15.65     0.51 o
  -6   6   2     2.54     1.43     0.28 o
  -4   6   2    99.55    91.13     1.21 o
  -3   6   2    26.90    26.16     0.31 o
  -2   6   2     1.80     2.16     0.06 o
   0   6   2     0.97     0.77     0.05 o
   1   6   2     1.05     0.93     0.06 o
   2   6   2     5.82     5.21     0.08 o
   3   6   2   910.33   918.68     4.40 o
   5   6   2    19.98    19.65     0.22 o
   6   6   2     3.79     3.92     0.15 o
   7   6   2    16.20    16.61     0.30 o
   8   6   2     0.08    -0.05     0.15 <
   9   6   2    12.55    12.68     0.31 o
  10   6   2     2.08     2.39     0.40 o
  -7   7   2    86.30    90.63     1.20 o
  -6   7   2   718.07   720.45     6.63 o
  -5   7   2     8.43     8.87     0.33 o
  -4   7   2     5.82     5.48     0.25 o
  -3   7   2     1.55     1.10     0.21 o
  -2   7   2     2.17     1.99     0.10 o
  -1   7   2     0.01     0.00     0.05 <
   0   7   2     9.79     9.93     0.10 o
   1   7   2   194.73   216.71     0.98 o
   2   7   2   670.25   683.58     2.90 o
   3   7   2    48.25    46.47     0.34 o
   4   7   2    47.81    47.90     0.36 o
   5   7   2     3.08     3.07     0.13 o
   6   7   2     0.07     0.11     0.14 <
   7   7   2     0.25     0.17     0.14 <
   8   7   2     5.10     4.93     0.19 o
   9   7   2    93.24    96.11     1.24 o
  -7   8   2   139.25   143.81     2.73 o
  -6   8   2     0.67     0.54     0.23 <
  -5   8   2    13.33    12.94     0.38 o
  -4   8   2     0.15     0.42     0.18 <
  -3   8   2     0.01     0.14     0.20 <
  -2   8   2     3.98     4.16     0.16 o
  -1   8   2     6.82     6.81     0.13 o
   0   8   2    15.93    17.81     0.18 o
   1   8   2    17.21    18.01     0.18 o
   2   8   2     5.31     5.29     0.11 o
   3   8   2    30.31    31.33     0.23 o
   4   8   2     1.20     0.90     0.10 o
   5   8   2     1.77     1.81     0.14 o
   6   8   2    13.51    12.92     0.26 o
   7   8   2     3.96     3.78     0.18 o
   8   8   2   120.09   122.94     1.14 o
   9   8   2   229.70   236.08     2.50 o
  -6   9   2     7.24     8.10     0.54 o
  -5   9   2     0.52     0.68     0.21 o
  -4   9   2     0.00     0.10     0.19 <
  -3   9   2     3.67     3.88     0.29 o
  -2   9   2     2.87     2.92     0.31 o
  -1   9   2    83.87    84.55     0.63 o
   0   9   2   596.03   604.99     3.85 o
   1   9   2     0.88     0.91     0.11 o
   2   9   2    16.78    16.68     0.17 o
   3   9   2     3.39     3.30     0.12 o
   4   9   2    12.42    12.10     0.20 o
   5   9   2     2.98     2.80     0.14 o
   6   9   2     2.28     2.18     0.16 o
   7   9   2     0.15     0.37     0.16 <
   8   9   2   331.61   331.98     3.32 o
  -5  10   2     2.25     3.02     0.40 o
  -4  10   2     3.40     3.76     0.26 o
  -3  10   2    28.36    26.63     0.81 o
  -2  10   2    60.31    63.45     1.03 o
  -1  10   2   196.13   190.60     3.50 o
   0  10   2     4.76     5.42     0.24 o
   1  10   2     2.15     2.30     0.17 o
   2  10   2     0.24     0.22     0.15 <
   3  10   2     6.22     5.98     0.13 o
   4  10   2     0.04    -0.02     0.11 <
   5  10   2    50.31    49.34     0.44 o
   6  10   2    11.42    12.23     0.25 o
   7  10   2    96.12    95.15     1.24 o
  -2  11   2     7.95     7.39     0.62 o
  -1  11   2     0.04     0.13     0.43 <
   0  11   2     0.36     0.40     0.30 <
   1  11   2     1.56     1.63     0.23 o
   2  11   2     1.90     1.62     0.19 o
   3  11   2     5.34     4.93     0.22 o
   4  11   2    25.31    26.26     0.32 o
   5  11   2    62.51    61.62     0.54 o
   6  11   2    40.15    37.37     0.60 o
  -1  12   2     1.55     1.18     0.49 <
   0  12   2     0.00     0.23     0.45 <
   1  12   2     2.95     2.76     0.32 o
   2  12   2     5.25     5.38     0.31 o
   3  12   2    15.63    15.60     0.36 o
   4  12   2    55.22    55.18     0.83 o
   5  12   2    18.57    17.87     0.48 o
   0  13   2     2.45     1.74     0.52 o
   1  13   2     1.91     2.03     0.33 o
   2  13   2     0.51     0.02     0.31 <
  -3 -12   3    13.12    13.26     0.42 o
  -2 -12   3     2.65     2.70     0.28 o
  -1 -12   3     0.98     0.89     0.34 <
   0 -12   3     1.71     1.87     0.36 o
   1 -12   3     1.67     1.45     0.39 o
   2 -12   3    92.58    90.29     2.13 o
  -5 -11   3     0.05     0.05     0.22 <
  -4 -11   3     6.79     6.76     0.27 o
  -3 -11   3     0.04     0.15     0.19 <
  -2 -11   3     0.13     0.08     0.22 <
  -1 -11   3     3.49     3.66     0.28 o
   0 -11   3     0.07     0.35     0.33 <
   1 -11   3     5.69     5.27     0.42 o
   2 -11   3   362.14   367.48     4.44 o
  -7 -10   3     8.95     9.50     0.41 o
  -6 -10   3     0.02     0.39     0.26 <
  -5 -10   3     2.19     2.28     0.17 o
  -4 -10   3     5.26     5.13     0.18 o
  -3 -10   3     2.53     2.23     0.13 o
  -2 -10   3    22.85    20.88     0.37 o
  -1 -10   3     0.37     0.19     0.27 <
   0 -10   3     0.66     0.78     0.18 o
   1 -10   3   191.77   191.84     2.51 o
   2 -10   3     1.32     1.11     0.32 o
   3 -10   3     1.47     1.45     0.47 o
   4 -10   3     0.14     0.26     0.28 <
  -8  -9   3     1.64     1.64     0.31 o
  -7  -9   3     8.33     7.40     0.37 o
  -6  -9   3     3.50     3.65     0.17 o
  -5  -9   3    11.62    11.10     0.23 o
  -4  -9   3     0.25     0.23     0.12 <
  -3  -9   3     1.32     1.25     0.12 o
  -2  -9   3     2.34     2.79     0.12 o
  -1  -9   3   290.47   273.77     2.24 o
   0  -9   3     0.01    -0.14     0.15 <
   1  -9   3    12.33    12.90     0.53 o
   2  -9   3     0.00     0.18     0.22 <
   3  -9   3     4.08     3.74     0.30 o
   4  -9   3     0.03     0.29     0.30 <
   5  -9   3     0.47     0.53     0.26 <
  -8  -8   3     2.37     2.57     0.30 o
  -7  -8   3     0.62     0.65     0.16 o
  -6  -8   3     1.23     1.12     0.15 o
  -5  -8   3     4.73     4.71     0.15 o
  -4  -8   3     0.11     0.28     0.11 <
  -3  -8   3   197.12   185.89     1.14 o
  -2  -8   3   478.84   454.39     2.27 o
  -1  -8   3     1.93     2.03     0.09 o
   0  -8   3     8.95     9.28     0.18 o
   1  -8   3     6.61     7.06     0.21 o
   2  -8   3     2.73     2.34     0.17 o
   3  -8   3     2.81     2.59     0.21 o
   4  -8   3     6.72     7.06     0.36 o
   5  -8   3    17.35    18.47     0.45 o
   6  -8   3   170.54   174.27     1.90 o
  -9  -7   3     0.33     0.60     0.28 <
  -8  -7   3     2.55     2.59     0.24 o
  -7  -7   3     4.18     4.17     0.18 o
  -6  -7   3     1.84     1.20     0.15 o
  -5  -7   3     2.71     2.32     0.13 o
  -4  -7   3   756.10   717.01     3.92 o
  -2  -7   3     0.00     0.04     0.07 <
  -1  -7   3    16.56    15.85     0.18 o
   0  -7   3     8.18     8.04     0.12 o
   1  -7   3    13.67    12.48     0.14 o
   2  -7   3    14.94    13.92     0.20 o
   3  -7   3     0.50     0.45     0.13 o
   4  -7   3    39.54    39.78     0.63 o
   5  -7   3     0.46     1.07     0.22 o
   6  -7   3     0.00    -0.01     0.24 <
   7  -7   3     8.18     9.11     0.48 o
  -9  -6   3     0.01    -0.02     0.27 <
  -8  -6   3     1.08     1.13     0.17 o
  -7  -6   3     0.02     0.10     0.14 <
  -6  -6   3    37.34    36.35     0.39 o
  -5  -6   3     0.42     0.85     0.12 o
  -3  -6   3    36.63    34.28     0.31 o
  -2  -6   3    19.90    19.99     0.16 o
  -1  -6   3     5.12     5.00     0.08 o
   1  -6   3    25.18    26.48     0.17 o
   2  -6   3    23.45    21.75     0.14 o
   3  -6   3   574.80   574.36     4.01 o
   4  -6   3   166.63   173.34     1.55 o
   5  -6   3     5.21     5.16     0.26 o
   6  -6   3    13.66    13.47     0.39 o
   7  -6   3     1.39     1.25     0.35 o
   8  -6   3     0.02    -0.17     0.57 <
 -10  -5   3     6.51     7.10     0.33 o
  -9  -5   3     0.53     0.67     0.25 <
  -8  -5   3     0.02     0.12     0.13 <
  -7  -5   3    68.62    68.15     0.60 o
  -5  -5   3     4.90     4.12     0.14 o
  -3  -5   3     4.92     5.39     0.11 o
  -1  -5   3     0.89     0.87     0.05 o
   0  -5   3     5.06     4.44     0.06 o
   1  -5   3    39.47    38.93     0.20 o
   2  -5   3  2508.31  2468.43     8.43 o
   4  -5   3     0.46     0.23     0.11 <
   5  -5   3     1.13     0.97     0.15 o
   6  -5   3     3.49     4.18     0.24 o
   7  -5   3     0.03    -0.04     0.22 <
   8  -5   3    14.38    14.14     0.51 o
   9  -5   3    12.94    12.87     0.90 o
 -10  -4   3     0.16     0.30     0.31 <
  -9  -4   3     0.31     0.14     0.18 <
  -8  -4   3    94.79    98.29     0.74 o
  -6  -4   3     9.08     8.86     0.17 o
  -5  -4   3    11.92    12.18     0.19 o
  -4  -4   3     1.70     1.28     0.09 o
  -3  -4   3     1.71     1.21     0.08 o
  -2  -4   3     0.66     0.53     0.05 o
  -1  -4   3     0.04     0.02     0.04 <
   0  -4   3   257.98   282.29     1.17 o
   1  -4   3    93.22    91.08     0.40 o
   2  -4   3     0.25     0.00     0.04 <
   3  -4   3    89.68    92.94     0.37 o
   4  -4   3     9.05     8.24     0.10 o
   5  -4   3    10.37     9.99     0.19 o
   6  -4   3     0.91     0.88     0.16 o
   7  -4   3    20.18    20.74     0.57 o
   8  -4   3    14.90    15.69     0.51 o
   9  -4   3    49.24    47.28     1.14 o
 -10  -3   3     0.22     0.48     0.28 <
  -9  -3   3    56.22    59.91     0.69 o
  -8  -3   3    18.77    17.82     0.29 o
  -7  -3   3    13.33    12.79     0.19 o
  -6  -3   3     0.02     0.09     0.10 <
  -4  -3   3    15.34    15.55     0.18 o
  -3  -3   3    47.51    45.96     0.32 o
   0  -3   3   859.76   901.32     3.89 o
   1  -3   3     0.87     0.78     0.04 o
   2  -3   3    52.30    49.87     0.22 o
   5  -3   3     0.54     0.19     0.05 o
   6  -3   3     4.20     4.71     0.15 o
   7  -3   3     3.39     3.32     0.21 o
   8  -3   3   814.09   800.92     6.39 o
   9  -3   3     2.31     2.65     0.35 o
  10  -3   3     5.83     5.42     0.56 o
 -10  -2   3   335.11   336.35     2.98 o
  -9  -2   3     0.48     0.37     0.16 <
  -8  -2   3     8.24     8.42     0.19 o
  -7  -2   3     1.42     1.50     0.10 o
  -6  -2   3    10.76    10.64     0.15 o
  -5  -2   3     2.03     2.07     0.10 o
  -4  -2   3     7.27     6.85     0.12 o
  -2  -2   3  2184.04  2401.66    12.63 o
  -1  -2   3    88.97    94.74     0.48 o
   0  -2   3   195.31   202.59     0.89 o
   1  -2   3    27.50    29.15     0.14 o
   3  -2   3     0.73     0.81     0.04 o
   4  -2   3     0.75     0.71     0.04 o
   5  -2   3     4.62     3.97     0.07 o
   7  -2   3    83.63    78.50     0.65 o
   8  -2   3     0.06    -0.16     0.18 <
   9  -2   3     7.55     7.69     0.30 o
  10  -2   3     2.97     2.85     0.40 o
 -10  -1   3     3.67     4.09     0.50 o
  -9  -1   3     0.81     1.00     0.18 o
  -8  -1   3     0.11     0.14     0.12 <
  -7  -1   3     3.60     3.04     0.12 o
  -6  -1   3     1.13     0.94     0.08 o
  -5  -1   3   123.40   118.62     0.70 o
  -4  -1   3     1.14     0.98     0.07 o
  -3  -1   3  3077.06  3280.33    15.41 o
  -2  -1   3     9.25     9.78     0.11 o
  -1  -1   3   106.22   105.39     0.53 o
   0  -1   3     4.94     4.69     0.05 o
   1  -1   3    69.43    67.63     0.29 o
   2  -1   3     7.36     8.01     0.06 o
   8  -1   3     2.61     1.83     0.23 o
   9  -1   3     5.60     5.61     0.25 o
  10  -1   3     0.02     0.00     0.24 <
 -10   0   3     5.03     4.86     0.42 o
  -9   0   3     1.84     1.69     0.28 o
  -8   0   3     3.52     4.00     0.16 o
  -7   0   3     7.75     7.52     0.14 o
  -6   0   3    56.15    54.46     0.31 o
  -5   0   3   148.26   134.02     0.64 o
  -3   0   3     5.75     5.41     0.07 o
  -2   0   3   232.31   240.15     1.07 o
  -1   0   3     1.52     1.34     0.04 o
   0   0   3   534.27   540.08     3.05 o
   1   0   3     0.51     0.42     0.03 o
   2   0   3    91.35    94.52     0.44 o
   5   0   3     0.29     0.16     0.06 <
   7   0   3     1.08     1.18     0.10 o
   8   0   3     5.20     5.48     0.16 o
   9   0   3     0.75     0.95     0.20 o
  10   0   3     1.23     1.07     0.25 o
 -10   1   3     2.03     2.52     0.49 o
  -9   1   3     2.42     2.66     0.28 o
  -8   1   3     6.76     6.20     0.24 o
  -7   1   3     3.84     3.63     0.13 o
  -6   1   3   221.13   235.63     1.18 o
  -5   1   3  1350.39  1270.91     5.13 o
  -4   1   3     0.00     0.03     0.05 <
  -2   1   3     6.53     6.37     0.06 o
  -1   1   3   356.12   362.14     1.40 o
   0   1   3    14.76    15.25     0.08 o
   1   1   3   159.92   158.14     0.77 o
   4   1   3     7.66     7.97     0.10 o
   6   1   3     0.04     0.14     0.07 <
   7   1   3     6.45     5.95     0.13 o
   8   1   3     0.11     0.28     0.12 <
   9   1   3     4.81     5.00     0.18 o
  10   1   3     0.25     0.14     0.29 <
 -10   2   3     0.82     0.84     0.36 <
  -9   2   3     1.17     1.21     0.27 o
  -8   2   3     0.68     1.04     0.18 o
  -7   2   3  1475.83  1486.02     9.23 o
  -6   2   3   113.99   117.17     0.84 o
  -5   2   3     3.47     3.31     0.07 o
  -3   2   3    40.47    37.68     0.19 o
  -2   2   3    12.42    13.26     0.07 o
  -1   2   3   464.98   480.78     1.62 o
   1   2   3 10674.30 10761.10    50.38 o
   2   2   3    93.03   102.31     0.52 o
   3   2   3    20.95    22.65     0.22 o
   4   2   3     0.02     0.19     0.06 o
   6   2   3    18.11    17.78     0.16 o
   7   2   3     8.77     8.46     0.17 o
   8   2   3     6.30     6.02     0.17 o
   9   2   3    24.98    24.20     0.33 o
  10   2   3    17.83    15.90     0.46 o
 -10   3   3     0.21     0.01     0.36 <
  -9   3   3     7.36     6.82     0.42 o
  -8   3   3   257.46   258.43     2.67 o
  -7   3   3    16.74    16.26     0.32 o
  -6   3   3    34.96    34.95     0.35 o
  -5   3   3     7.32     7.08     0.09 o
  -4   3   3    31.26    33.94     0.17 o
  -2   3   3   295.97   328.72     1.06 o
   0   3   3     2.87     3.02     0.04 o
   1   3   3   637.72   709.84     3.07 o
   2   3   3   285.37   310.07     1.68 o
   3   3   3     0.15     0.06     0.07 <
   4   3   3    26.76    27.78     0.25 o
   5   3   3    16.14    14.92     0.16 o
   6   3   3    24.82    25.15     0.22 o
   7   3   3    10.63    10.21     0.17 o
   8   3   3    62.49    66.98     0.55 o
   9   3   3    98.94    98.49     0.75 o
  10   3   3     0.00    -0.17     0.20 <
 -10   4   3   117.35   121.30     2.11 o
  -9   4   3     5.38     3.74     0.38 o
  -8   4   3    16.74    17.33     0.54 o
  -7   4   3    23.63    24.44     0.47 o
  -6   4   3     1.67     1.59     0.13 o
  -5   4   3     0.02     0.07     0.08 <
  -4   4   3     0.57     0.65     0.06 o
  -3   4   3    33.07    35.22     0.18 o
  -2   4   3   360.01   383.48     1.36 o
  -1   4   3  5192.72  5639.43    18.30 o
   0   4   3    27.32    26.43     0.13 o
   1   4   3   261.10   285.00     1.22 o
   2   4   3     0.27     0.32     0.05 o
   4   4   3     0.08     0.07     0.06 <
   5   4   3     6.62     6.70     0.11 o
   6   4   3     6.20     7.15     0.15 o
   7   4   3  1537.51  1542.12     8.23 o
   8   4   3     0.15     0.14     0.12 <
   9   4   3     0.82     1.01     0.15 o
  10   4   3     0.07     0.15     0.26 <
  -9   5   3     0.01    -0.04     0.46 <
  -8   5   3     0.33    -0.31     0.41 <
  -7   5   3     2.28     1.78     0.39 o
  -6   5   3     1.98     2.23     0.21 o
  -5   5   3    29.02    28.62     0.38 o
  -4   5   3     4.72     5.25     0.20 o
  -2   5   3  1878.81  2075.00     7.54 o
   1   5   3     0.09     0.18     0.05 o
   3   5   3    35.55    35.98     0.23 o
   4   5   3    16.92    16.65     0.17 o
   6   5   3   461.51   466.48     2.63 o
   7   5   3    16.83    16.86     0.27 o
   8   5   3    20.45    20.16     0.29 o
   9   5   3     0.00     0.07     0.16 <
  10   5   3     4.59     5.42     0.39 o
  -7   6   3     7.39     7.80     0.45 o
  -6   6   3     0.39     0.40     0.24 <
  -5   6   3     1.32     1.81     0.20 o
  -3   6   3   283.37   282.28     2.24 o
  -2   6   3     3.25     3.43     0.08 o
   0   6   3    15.95    16.61     0.11 o
   1   6   3     9.25     9.16     0.11 o
   2   6   3    13.98    13.56     0.13 o
   3   6   3     0.02    -0.02     0.06 <
   4   6   3   221.76   203.17     1.12 o
   5   6   3   219.54   217.51     1.31 o
   6   6   3     0.22     0.33     0.11 o
   7   6   3    29.36    28.80     0.39 o
   8   6   3     2.15     2.11     0.16 o
   9   6   3     4.09     4.09     0.23 o
  10   6   3     0.01     0.19     0.37 <
  -7   7   3     1.94     2.32     0.31 o
  -6   7   3   130.50   129.80     1.53 o
  -5   7   3    71.59    71.43     1.20 o
  -4   7   3    60.15    55.77     0.98 o
  -3   7   3     4.00     4.44     0.28 o
  -2   7   3     9.04     8.82     0.15 o
  -1   7   3     0.01     0.03     0.05 <
   0   7   3     0.18     0.14     0.05 <
   2   7   3    42.62    42.78     0.26 o
   3   7   3   797.72   778.80     3.96 o
   4   7   3   200.30   196.85     1.11 o
   5   7   3     2.00     2.28     0.12 o
   6   7   3     0.48     0.59     0.13 o
   7   7   3     0.11     0.19     0.13 <
   8   7   3     1.81     1.75     0.16 o
   9   7   3    11.14    11.11     0.41 o
  -7   8   3    96.95   103.42     2.11 o
  -6   8   3    81.23    83.11     1.13 o
  -5   8   3    23.11    23.07     0.51 o
  -4   8   3     0.42     0.50     0.19 <
  -3   8   3     4.40     4.27     0.29 o
  -2   8   3     1.76     2.00     0.14 o
  -1   8   3     0.03     0.06     0.08 <
   0   8   3     0.12     0.07     0.07 <
   1   8   3    20.84    22.19     0.19 o
   2   8   3    26.02    25.38     0.21 o
   3   8   3    80.18    81.48     0.45 o
   4   8   3     3.24     2.63     0.11 o
   5   8   3     0.17     0.19     0.12 <
   6   8   3    10.47    10.08     0.22 o
   7   8   3     1.34     1.55     0.15 o
   8   8   3     7.72     7.69     0.27 o
   9   8   3    30.75    33.15     0.67 o
  -6   9   3     5.12     4.95     0.35 o
  -5   9   3     4.05     4.10     0.27 o
  -4   9   3     0.40     0.53     0.21 <
  -3   9   3     4.35     4.56     0.30 o
  -2   9   3     0.63     0.53     0.22 <
  -1   9   3     1.28     1.28     0.13 o
   0   9   3   411.68   426.78     2.77 o
   1   9   3    19.52    19.55     0.23 o
   2   9   3    18.62    18.66     0.19 o
   3   9   3     1.57     1.29     0.10 o
   4   9   3     7.42     7.41     0.17 o
   5   9   3     0.30     0.45     0.11 o
   6   9   3     0.33     0.46     0.13 o
   7   9   3     0.25     0.33     0.15 <
   8   9   3   208.94   214.22     2.30 o
  -5  10   3     4.96     4.87     0.47 o
  -4  10   3     2.31     2.40     0.25 o
  -3  10   3     3.36     3.35     0.37 o
  -2  10   3     1.18     1.67     0.43 o
  -1  10   3   569.06   544.64     8.80 o
   0  10   3   174.01   176.60     1.53 o
   1  10   3     0.41     0.42     0.12 o
   2  10   3     0.39     0.19     0.15 <
   3  10   3    11.99    11.81     0.18 o
   4  10   3     0.06     0.22     0.12 <
   5  10   3     9.40     9.47     0.21 o
   6  10   3     2.64     2.68     0.17 o
   7  10   3   259.90   259.16     2.67 o
  -2  11   3     1.21     1.17     0.46 <
  -1  11   3     0.45     0.66     0.30 <
   0  11   3    10.59     9.96     0.46 o
   1  11   3     2.75     2.37     0.24 o
   2  11   3     3.74     3.61     0.21 o
   3  11   3     3.57     3.30     0.23 o
   4  11   3     4.09     4.20     0.17 o
   5  11   3     1.65     1.39     0.15 o
   6  11   3    36.01    35.29     0.65 o
  -1  12   3     2.38     2.22     0.52 o
   0  12   3     0.19     0.19     0.30 <
   1  12   3     3.12     3.40     0.27 o
   2  12   3     5.54     4.90     0.37 o
   3  12   3     0.08     0.33     0.23 <
   4  12   3    34.88    33.82     0.63 o
   5  12   3   233.14   229.07     2.39 o
   0  13   3     0.43     0.87     0.52 <
   1  13   3     2.87     3.59     0.58 o
   2  13   3     1.05     0.64     0.31 <
   3  13   3    55.01    57.55     1.09 o
  -3 -12   4    41.07    40.67     0.72 o
  -2 -12   4     3.46     3.49     0.30 o
  -1 -12   4     0.31     0.03     0.34 <
   0 -12   4     1.56     1.67     0.36 o
   1 -12   4     0.19     0.10     0.35 <
  -5 -11   4    30.61    29.22     0.47 o
  -4 -11   4    17.80    17.37     0.39 o
  -3 -11   4     0.94     1.01     0.21 o
  -2 -11   4     0.11    -0.01     0.23 <
  -1 -11   4     3.11     3.15     0.27 o
   0 -11   4     0.00     0.10     0.31 <
   1 -11   4     1.06     1.30     0.34 o
   2 -11   4   147.55   144.25     2.08 o
  -6 -10   4     4.88     5.32     0.33 o
  -5 -10   4     1.86     2.01     0.15 o
  -4 -10   4    10.74    10.48     0.21 o
  -3 -10   4     6.19     5.86     0.17 o
  -2 -10   4     6.25     5.68     0.21 o
  -1 -10   4     0.23     0.30     0.21 <
   0 -10   4     0.00    -0.14     0.28 <
   1 -10   4   442.25   444.19     5.17 o
   2 -10   4    44.06    41.54     0.88 o
   3 -10   4     0.04     0.08     0.45 <
  -7  -9   4   107.68   107.57     1.37 o
  -6  -9   4     2.82     3.02     0.18 o
  -5  -9   4    10.61     9.71     0.21 o
  -4  -9   4     0.10     0.18     0.12 <
  -3  -9   4     0.42     0.52     0.12 o
  -2  -9   4     0.27     0.24     0.11 <
  -1  -9   4    15.06    14.31     0.33 o
   0  -9   4   174.61   172.12     1.71 o
   1  -9   4   198.57   188.47     3.24 o
   2  -9   4     6.76     6.77     0.55 o
   3  -9   4     6.28     6.13     0.34 o
   4  -9   4     1.64     1.78     0.34 o
   5  -9   4     0.38     0.23     0.25 <
  -8  -8   4    14.14    14.27     0.47 o
  -7  -8   4     0.02    -0.28     0.21 <
  -6  -8   4     0.01     0.11     0.15 <
  -5  -8   4     1.19     1.34     0.13 o
  -4  -8   4    10.76    10.28     0.19 o
  -3  -8   4    19.83    19.03     0.24 o
  -2  -8   4   117.45   106.01     0.67 o
  -1  -8   4   114.85   108.20     0.71 o
   0  -8   4    57.49    60.87     0.58 o
   1  -8   4    24.13    24.52     0.32 o
   2  -8   4     0.75     0.66     0.16 o
   3  -8   4     0.68     0.86     0.21 o
   4  -8   4     0.00    -0.10     0.20 <
   5  -8   4     4.44     4.43     0.32 o
   6  -8   4    29.50    30.50     1.01 o
  -9  -7   4     0.38     0.27     0.29 <
  -8  -7   4     7.71     7.63     0.36 o
  -7  -7   4     0.31     0.54     0.15 o
  -6  -7   4     0.17     0.15     0.14 <
  -5  -7   4     6.52     5.93     0.17 o
  -4  -7   4    15.10    15.05     0.21 o
  -2  -7   4    92.12    85.47     0.54 o
  -1  -7   4    22.71    21.29     0.23 o
   0  -7   4    27.80    26.43     0.23 o
   1  -7   4     0.45     0.25     0.09 <
   2  -7   4     9.99     9.51     0.17 o
   3  -7   4     4.54     4.78     0.18 o
   4  -7   4     2.03     2.43     0.26 o
   5  -7   4     1.59     1.49     0.20 o
   6  -7   4   385.61   393.64     4.66 o
   7  -7   4    14.40    15.19     0.85 o
  -9  -6   4     0.36     0.28     0.37 <
  -8  -6   4     0.43     0.60     0.16 o
  -7  -6   4     0.07     0.16     0.14 <
  -6  -6   4    11.41    11.37     0.26 o
  -5  -6   4     3.51     3.20     0.14 o
  -4  -6   4   153.57   170.87     1.05 o
  -3  -6   4  1153.39  1058.26     5.35 o
  -2  -6   4    16.78    17.13     0.16 o
  -1  -6   4    10.30     9.54     0.11 o
   1  -6   4    13.01    14.07     0.11 o
   2  -6   4    15.08    14.12     0.12 o
   3  -6   4     2.32     2.30     0.13 o
   4  -6   4   122.14   124.16     1.18 o
   5  -6   4   616.61   639.32     5.81 o
   6  -6   4    10.63    11.21     0.32 o
   7  -6   4     1.46     1.32     0.34 o
   8  -6   4     0.14     0.17     0.56 <
 -10  -5   4     3.50     4.37     0.31 o
  -9  -5   4     0.82     1.06     0.21 o
  -8  -5   4     0.47     0.62     0.15 o
  -7  -5   4    13.88    14.31     0.24 o
  -2  -5   4    10.30     9.22     0.10 o
  -1  -5   4     0.22     0.24     0.05 o
   0  -5   4     1.50     1.57     0.07 o
   1  -5   4    10.96    10.12     0.10 o
   2  -5   4    47.32    46.28     0.21 o
   4  -5   4    45.55    42.75     0.42 o
   5  -5   4     2.86     2.68     0.17 o
   6  -5   4     4.92     5.52     0.30 o
   7  -5   4     1.19     0.75     0.25 <
   8  -5   4     4.12     4.52     0.43 o
   9  -5   4     2.71     2.40     0.66 o
 -10  -4   4     0.01     0.20     0.32 <
  -9  -4   4     0.26     0.46     0.16 <
  -8  -4   4    10.50    11.06     0.23 o
  -6  -4   4   192.51   177.46     1.11 o
  -5  -4   4    58.08    60.14     0.54 o
  -3  -4   4     0.02     0.02     0.06 <
  -1  -4   4     1.75     1.91     0.06 o
   3  -4   4   472.20   473.01     1.77 o
   4  -4   4    16.45    15.35     0.14 o
   5  -4   4     5.33     5.21     0.16 o
   6  -4   4     1.30     1.27     0.17 o
   7  -4   4     4.23     4.29     0.37 o
   8  -4   4     2.36     2.58     0.27 o
   9  -4   4     0.68     0.43     0.42 <
 -10  -3   4     0.64     0.38     0.28 <
  -9  -3   4     0.28     0.34     0.18 <
  -8  -3   4     1.40     1.10     0.14 o
  -7  -3   4    64.72    71.26     0.54 o
  -6  -3   4     2.83     2.19     0.12 o
  -4  -3   4     2.67     2.27     0.08 o
  -3  -3   4    35.67    36.44     0.27 o
  -2  -3   4    23.47    21.73     0.19 o
  -1  -3   4    40.39    43.15     0.24 o
   0  -3   4   465.55   475.90     1.79 o
   1  -3   4   948.40  1056.85     3.96 o
   2  -3   4   111.31   107.90     0.42 o
   4  -3   4     0.04     0.13     0.05 <
   5  -3   4     0.83     0.39     0.07 o
   6  -3   4     8.39     9.10     0.19 o
   7  -3   4     0.51     0.39     0.19 <
   8  -3   4   215.57   208.01     1.93 o
   9  -3   4   175.61   183.96     2.13 o
  10  -3   4    47.08    51.27     1.23 o
 -10  -2   4     3.63     4.31     0.39 o
  -9  -2   4     0.31     0.52     0.17 o
  -8  -2   4   280.14   289.78     1.75 o
  -7  -2   4     0.08    -0.04     0.10 <
  -6  -2   4    26.68    27.10     0.25 o
  -5  -2   4     0.07     0.09     0.08 <
  -4  -2   4     4.54     5.23     0.10 o
  -3  -2   4     0.05     0.27     0.07 o
  -1  -2   4     7.47     8.28     0.08 o
   0  -2   4   918.50   978.65     3.91 o
   1  -2   4    16.25    17.71     0.10 o
   3  -2   4    10.00     9.50     0.08 o
   4  -2   4     2.36     2.26     0.06 o
   5  -2   4     7.43     6.54     0.10 o
   6  -2   4     4.30     3.97     0.13 o
   7  -2   4   113.36   106.55     0.76 o
   8  -2   4   134.05   137.73     1.11 o
   9  -2   4     9.68    10.43     0.34 o
  10  -2   4     8.89     9.19     0.61 o
 -10  -1   4    94.74    98.72     1.42 o
  -9  -1   4    47.29    46.70     0.50 o
  -8  -1   4     0.07     0.16     0.12 <
  -7  -1   4    12.28    11.09     0.18 o
  -6  -1   4     0.56     0.48     0.07 o
  -5  -1   4    19.42    18.23     0.17 o
  -4  -1   4     2.14     2.11     0.07 o
  -3  -1   4   118.92   114.70     0.68 o
  -2  -1   4     0.06     0.07     0.06 <
   0  -1   4     0.04     0.03     0.04 <
   1  -1   4    71.27    69.17     0.35 o
   2  -1   4     4.95     5.04     0.05 o
   3  -1   4    48.27    50.31     0.23 o
   5  -1   4    14.44    15.74     0.16 o
   8  -1   4     0.03    -0.05     0.16 <
   9  -1   4    17.02    16.03     0.35 o
  10  -1   4     0.36     0.73     0.29 <
 -10   0   4    13.81    14.40     0.54 o
  -9   0   4     8.28     8.50     0.34 o
  -8   0   4     0.00     0.01     0.11 <
  -7   0   4    10.49    10.09     0.17 o
  -6   0   4     1.28     1.22     0.08 o
  -5   0   4    21.62    19.88     0.16 o
  -4   0   4     0.20     0.27     0.06 o
  -3   0   4   193.47   205.94     0.98 o
  -2   0   4   536.27   555.85     2.53 o
  -1   0   4     4.35     4.93     0.06 o
   0   0   4   313.25   323.11     1.73 o
   1   0   4     3.21     3.18     0.05 o
   2   0   4     1.27     1.06     0.04 o
   3   0   4     0.04     0.08     0.04 <
   4   0   4     0.50     0.06     0.07 <
   5   0   4     0.07     0.05     0.05 <
   7   0   4     0.56     0.56     0.10 o
   8   0   4     1.91     2.14     0.13 o
   9   0   4     0.94     1.37     0.21 o
  10   0   4     3.81     4.19     0.34 o
 -10   1   4     8.68     9.19     0.63 o
  -9   1   4     1.11     1.23     0.22 o
  -8   1   4     7.98     7.94     0.26 o
  -7   1   4     0.05     0.11     0.11 <
  -6   1   4     1.74     1.98     0.09 o
  -5   1   4   702.82   656.19     2.45 o
  -4   1   4  1873.56  1824.21     6.84 o
  -3   1   4    56.42    62.94     0.29 o
  -2   1   4    20.70    22.81     0.12 o
  -1   1   4   218.16   221.74     0.88 o
   0   1   4    49.04    47.96     0.21 o
   1   1   4    65.49    63.20     0.35 o
   6   1   4     0.79     0.55     0.07 o
   7   1   4     0.82     0.69     0.09 o
   8   1   4     0.27     0.26     0.12 <
   9   1   4     5.29     5.82     0.18 o
  10   1   4     0.45     0.37     0.28 <
 -10   2   4     0.22     0.37     0.47 <
  -9   2   4     0.47     0.83     0.26 o
  -8   2   4     0.44     0.35     0.19 <
  -7   2   4     1.99     2.06     0.17 o
  -6   2   4   239.62   235.64     1.18 o
  -5   2   4   417.52   406.42     1.71 o
  -4   2   4     4.04     4.35     0.07 o
  -3   2   4    28.80    25.53     0.14 o
  -2   2   4    13.60    14.17     0.08 o
  -1   2   4   129.46   130.42     0.47 o
   1   2   4    86.31    87.62     0.45 o
   2   2   4   290.97   329.43     1.59 o
   6   2   4    13.34    12.43     0.12 o
   7   2   4     2.47     2.63     0.11 o
   8   2   4     4.23     4.40     0.14 o
   9   2   4     0.20     0.18     0.16 <
  10   2   4     0.40     0.13     0.28 <
 -10   3   4     0.24     0.21     0.47 <
  -9   3   4     0.07     0.39     0.32 <
  -8   3   4    10.49    10.28     0.41 o
  -7   3   4    83.30    83.09     0.89 o
  -6   3   4   305.36   304.36     1.89 o
  -5   3   4     9.14     8.46     0.10 o
  -4   3   4    24.90    25.77     0.14 o
  -2   3   4    93.98    97.65     0.34 o
   0   3   4     0.75     0.89     0.03 o
   1   3   4  1269.71  1377.91     6.49 o
   3   3   4     6.77     5.87     0.11 o
   4   3   4    42.20    47.09     0.31 o
   6   3   4    10.60    11.39     0.15 o
   7   3   4     4.60     4.49     0.13 o
   8   3   4     0.92     0.87     0.13 o
   9   3   4   113.43   115.63     0.89 o
  10   3   4    14.96    17.47     0.40 o
  -9   4   4     2.77     1.53     0.46 o
  -8   4   4   210.94   200.71     2.82 o
  -7   4   4   133.62   140.79     1.82 o
  -6   4   4     0.31     0.56     0.14 o
  -5   4   4     0.11    -0.04     0.08 <
  -4   4   4     0.00     0.02     0.04 <
  -3   4   4    26.89    26.43     0.14 o
  -2   4   4    56.80    59.67     0.24 o
   1   4   4  1402.82  1583.61     6.31 o
   2   4   4    27.34    29.10     0.25 o
   3   4   4    20.42    18.47     0.16 o
   4   4   4     0.23     0.29     0.06 o
   5   4   4     0.01    -0.02     0.08 <
   6   4   4     0.87     0.97     0.09 o
   7   4   4    67.08    67.67     0.47 o
   9   4   4    47.18    49.02     0.54 o
  10   4   4     1.72     2.08     0.36 o
  -8   5   4     3.11     3.37     0.49 o
  -7   5   4     6.21     6.09     0.48 o
  -6   5   4     2.44     2.38     0.20 o
  -5   5   4    17.51    17.21     0.29 o
  -4   5   4     5.20     6.09     0.16 o
  -3   5   4    10.31    11.11     0.10 o
  -2   5   4   760.12   860.31     3.07 o
   0   5   4     6.13     6.92     0.07 o
   1   5   4     0.23     0.40     0.04 o
   2   5   4    15.35    14.03     0.15 o
   3   5   4    28.51    30.02     0.24 o
   4   5   4     0.09     0.22     0.07 <
   5   5   4     0.40     0.19     0.08 <
   6   5   4   149.47   146.85     0.89 o
   7   5   4    92.36    90.04     0.59 o
   8   5   4    61.57    60.36     0.57 o
   9   5   4     0.39     0.52     0.16 o
  10   5   4     2.98     3.24     0.35 o
  -8   6   4     4.74     4.18     0.71 o
  -7   6   4     4.38     4.80     0.48 o
  -6   6   4     0.06     0.24     0.25 <
  -5   6   4     0.44     0.70     0.19 o
  -4   6   4     1.00     1.53     0.19 o
  -3   6   4   542.29   553.17     2.84 o
  -2   6   4   569.23   623.50     2.40 o
  -1   6   4     0.27     0.10     0.04 <
   0   6   4    52.53    58.93     0.28 o
   1   6   4    13.65    14.34     0.13 o
   2   6   4    12.65    13.01     0.13 o
   3   6   4     0.56     0.32     0.06 o
   4   6   4     0.01     0.03     0.07 <
   5   6   4    47.19    50.51     0.39 o
   6   6   4   103.40   106.98     0.70 o
   7   6   4    41.94    40.83     0.38 o
   8   6   4    21.98    21.50     0.31 o
   9   6   4     1.58     1.65     0.19 o
  10   6   4     0.77     0.66     0.35 <
  -7   7   4     0.38     0.62     0.31 <
  -6   7   4    21.30    21.64     0.63 o
  -5   7   4    10.39    10.77     0.45 o
  -4   7   4   374.16   365.37     4.31 o
  -3   7   4   119.50   135.40     1.84 o
  -2   7   4    26.80    27.19     0.28 o
  -1   7   4     0.61     0.86     0.06 o
   0   7   4     0.01    -0.02     0.05 <
   1   7   4     0.07     0.25     0.05 o
   2   7   4    16.38    16.41     0.14 o
   3   7   4    31.32    32.36     0.25 o
   4   7   4   368.66   361.29     1.82 o
   5   7   4   259.68   270.54     1.51 o
   6   7   4     1.46     1.44     0.12 o
   7   7   4     4.71     4.33     0.18 o
   8   7   4     2.59     2.78     0.17 o
   9   7   4     1.56     1.36     0.27 o
  -6   8   4     5.25     5.71     0.32 o
  -5   8   4   165.04   162.53     1.81 o
  -4   8   4     0.02    -0.07     0.21 <
  -3   8   4    39.02    36.78     0.75 o
  -2   8   4     0.33     0.58     0.13 o
  -1   8   4     2.08     2.07     0.10 o
   0   8   4     7.75     7.43     0.14 o
   1   8   4    11.25    11.13     0.13 o
   2   8   4    21.26    21.96     0.17 o
   3   8   4   885.42   886.23     3.91 o
   5   8   4     0.55     0.40     0.11 o
   6   8   4     7.45     7.81     0.19 o
   7   8   4     0.15     0.27     0.13 <
   8   8   4     0.19     0.14     0.18 <
   9   8   4     1.15     1.21     0.28 o
  -6   9   4   606.58   629.46     7.14 o
  -5   9   4    14.83    14.93     0.43 o
  -4   9   4     4.90     4.53     0.28 o
  -3   9   4     5.67     5.89     0.34 o
  -2   9   4     0.00     0.00     0.22 <
  -1   9   4     4.81     4.88     0.20 o
   0   9   4     6.84     7.26     0.17 o
   1   9   4     7.76     7.10     0.16 o
   2   9   4  1270.49  1288.94     5.90 o
   3   9   4     4.18     3.49     0.11 o
   4   9   4     4.11     4.24     0.14 o
   5   9   4     0.12     0.30     0.11 <
   6   9   4     0.64     0.60     0.13 o
   7   9   4     0.05     0.08     0.15 <
   8   9   4     7.04     7.18     0.37 o
  -5  10   4    14.05    13.60     0.69 o
  -4  10   4     5.11     5.05     0.30 o
  -3  10   4     0.87     0.79     0.32 <
  -2  10   4     2.38     2.19     0.32 o
  -1  10   4     0.70     0.75     0.39 <
   0  10   4    87.15    88.62     0.88 o
   1  10   4    11.34    11.96     0.24 o
   2  10   4     0.48     0.40     0.18 <
   3  10   4    27.86    26.97     0.27 o
   4  10   4     0.52     0.66     0.13 o
   5  10   4     3.25     3.10     0.16 o
   6  10   4     1.75     1.75     0.14 o
   7  10   4     2.19     1.95     0.29 o
  -3  11   4     0.96     1.87     0.47 o
  -1  11   4     7.80     7.92     0.43 o
   0  11   4   285.52   279.04     3.45 o
   1  11   4     0.17    -0.12     0.18 <
   2  11   4     5.43     5.57     0.27 o
   3  11   4     0.49     0.51     0.17 <
   4  11   4     0.85     0.74     0.13 o
   5  11   4     1.11     1.12     0.15 o
   6  11   4     0.00    -0.02     0.23 <
   7  11   4   115.36   117.60     1.25 o
  -1  12   4    12.75    12.96     0.77 o
   0  12   4     4.46     3.96     0.39 o
   1  12   4     7.98     7.90     0.34 o
   2  12   4     4.43     4.72     0.24 o
   3  12   4     0.02    -0.04     0.22 <
   4  12   4     4.38     3.73     0.28 o
   5  12   4    11.61    11.74     0.40 o
  -1  13   4     3.00     3.61     0.60 o
   0  13   4     0.65     0.75     0.36 <
   1  13   4     4.88     4.83     0.41 o
   2  13   4     0.32     0.18     0.30 <
   3  13   4     3.11     2.98     0.37 o
  -2 -12   5    29.76    30.94     0.62 o
  -1 -12   5     0.76     1.01     0.37 <
   0 -12   5     1.19     1.17     0.37 o
  -5 -11   5     1.71     1.24     0.22 o
  -4 -11   5   564.30   562.47     4.52 o
  -3 -11   5     1.90     1.54     0.26 o
  -2 -11   5     0.37     0.54     0.24 <
  -1 -11   5     4.05     3.49     0.28 o
   0 -11   5     0.00    -0.26     0.33 <
   1 -11   5     1.71     1.44     0.34 o
   2 -11   5     8.93     8.35     0.48 o
   3 -11   5    32.31    31.18     1.17 o
  -6 -10   5     4.99     4.61     0.28 o
  -5 -10   5   177.19   179.74     1.36 o
  -4 -10   5    12.10    12.30     0.23 o
  -3 -10   5     9.37     9.56     0.20 o
  -2 -10   5     1.91     2.04     0.20 o
  -1 -10   5     0.38     0.35     0.22 <
   0 -10   5     0.27     0.15     0.29 <
   1 -10   5    12.62    12.10     0.50 o
   2 -10   5     8.36     7.97     0.45 o
   3 -10   5     2.99     2.69     0.53 o
  -7  -9   5   167.20   171.88     1.93 o
  -6  -9   5    40.93    40.58     0.59 o
  -5  -9   5     3.51     3.25     0.18 o
  -4  -9   5     1.27     1.52     0.15 o
  -3  -9   5     0.02     0.15     0.13 <
  -2  -9   5     0.47     0.41     0.10 o
  -1  -9   5     5.66     5.18     0.23 o
   0  -9   5     1.61     1.34     0.16 o
   1  -9   5   154.97   142.58     1.52 o
   2  -9   5   378.88   375.33     6.28 o
   3  -9   5     8.90     7.39     0.60 o
   4  -9   5     7.32     6.94     0.38 o
   5  -9   5     0.65     0.83     0.38 <
  -8  -8   5    15.59    16.22     0.42 o
  -7  -8   5     0.00     0.36     0.22 <
  -6  -8   5     0.10     0.02     0.15 <
  -5  -8   5     0.26     0.17     0.14 <
  -4  -8   5    14.58    14.00     0.23 o
  -3  -8   5     4.99     4.99     0.15 o
  -2  -8   5    26.91    24.75     0.27 o
  -1  -8   5     9.36     8.03     0.15 o
   0  -8   5   184.97   192.89     1.47 o
   1  -8   5   236.40   236.77     1.61 o
   2  -8   5     0.07     0.32     0.21 <
   3  -8   5     0.07     0.07     0.25 <
   4  -8   5     1.19     0.89     0.22 o
   5  -8   5     3.42     3.36     0.29 o
  -9  -7   5    41.04    42.18     0.78 o
  -8  -7   5    49.11    50.51     0.73 o
  -7  -7   5     0.68     0.94     0.18 o
  -6  -7   5     0.34     0.28     0.16 <
  -5  -7   5     8.79     8.49     0.20 o
  -4  -7   5     0.08     0.07     0.11 <
  -3  -7   5     1.27     1.63     0.10 o
  -2  -7   5     5.02     4.76     0.11 o
   0  -7   5   177.30   162.54     0.92 o
   1  -7   5    15.09    15.42     0.22 o
   2  -7   5    11.17    10.57     0.19 o
   3  -7   5    10.67    10.65     0.24 o
   4  -7   5     0.04     0.00     0.22 <
   5  -7   5     0.65     0.53     0.18 <
   6  -7   5    31.73    32.23     0.76 o
  -9  -6   5     4.36     3.04     0.42 o
  -8  -6   5     0.27     0.37     0.19 <
  -7  -6   5     0.00     0.18     0.16 <
  -6  -6   5     2.23     2.37     0.16 o
  -5  -6   5     3.66     3.39     0.16 o
  -4  -6   5     0.44     0.72     0.09 o
  -3  -6   5   883.92   807.68     3.90 o
  -1  -6   5    33.53    31.73     0.23 o
   0  -6   5    18.28    19.67     0.16 o
   1  -6   5    14.04    14.50     0.17 o
   2  -6   5     4.50     4.05     0.10 o
   3  -6   5     0.15     0.24     0.11 <
   4  -6   5     0.83     0.94     0.17 o
   5  -6   5   273.82   280.45     2.72 o
   6  -6   5   273.52   262.77     2.69 o
   7  -6   5     1.21     0.74     0.26 <
   8  -6   5     3.66     4.18     0.71 o
  -9  -5   5     2.66     2.67     0.37 o
  -8  -5   5     4.44     4.51     0.22 o
  -7  -5   5     6.16     6.43     0.19 o
  -6  -5   5    14.09    12.84     0.22 o
  -5  -5   5     0.00     0.06     0.11 <
  -2  -5   5     2.17     2.02     0.06 o
  -1  -5   5     0.01    -0.01     0.05 <
   0  -5   5    23.21    21.44     0.19 o
   2  -5   5    53.64    52.48     0.24 o
   3  -5   5     3.47     3.31     0.08 o
   4  -5   5   128.40   132.66     0.91 o
   5  -5   5    34.67    35.54     0.50 o
   6  -5   5     2.87     3.10     0.43 o
   7  -5   5     1.76     1.45     0.27 o
   8  -5   5     0.92     0.69     0.27 <
   9  -5   5     1.13     0.49     0.62 <
 -10  -4   5     0.00    -0.30     0.45 <
  -9  -4   5     0.01    -0.07     0.19 <
  -8  -4   5     3.01     3.40     0.17 o
  -7  -4   5     0.18     0.37     0.12 o
  -5  -4   5    54.70    57.10     0.48 o
  -1  -4   5    12.21    11.63     0.13 o
   2  -4   5     0.64     0.50     0.05 o
   3  -4   5  1253.93  1203.11     4.54 o
   4  -4   5   171.50   168.48     0.95 o
   5  -4   5     2.40     2.66     0.14 o
   6  -4   5     1.06     0.98     0.18 o
   7  -4   5     0.15     0.45     0.26 <
   8  -4   5     1.15     1.53     0.25 o
   9  -4   5     0.05    -0.32     0.44 <
 -10  -3   5     0.34    -0.25     0.37 <
  -9  -3   5     1.75     1.88     0.19 o
  -8  -3   5     0.27     0.39     0.13 <
  -7  -3   5    11.04    12.55     0.19 o
  -3  -3   5    26.24    27.61     0.22 o
  -2  -3   5    24.57    22.99     0.18 o
  -1  -3   5    31.51    28.09     0.22 o
   0  -3   5    45.79    46.03     0.25 o
   1  -3   5   116.04   116.80     0.50 o
   2  -3   5  2011.83  1977.32     6.84 o
   4  -3   5     0.34     0.48     0.05 o
   5  -3   5     1.51     1.22     0.09 o
   6  -3   5     9.62     9.89     0.21 o
   7  -3   5     0.54     0.56     0.19 <
   8  -3   5    24.21    23.74     0.48 o
   9  -3   5     8.24     7.68     0.35 o
 -10  -2   5     1.04     1.15     0.37 o
  -9  -2   5     0.28     0.42     0.17 <
  -8  -2   5   196.85   208.93     1.26 o
  -7  -2   5     1.50     1.95     0.12 o
  -6  -2   5    40.52    42.82     0.36 o
  -5  -2   5     0.03     0.10     0.08 <
  -4  -2   5     0.04     0.16     0.06 <
  -3  -2   5     0.47     0.32     0.06 o
  -1  -2   5     0.31     0.27     0.05 o
   1  -2   5    20.83    22.97     0.12 o
   3  -2   5    35.37    33.36     0.19 o
   4  -2   5    14.52    14.09     0.12 o
   5  -2   5     7.95     7.01     0.12 o
   6  -2   5     0.02     0.02     0.09 <
   7  -2   5     8.53     8.20     0.20 o
   8  -2   5    28.52    28.03     0.45 o
   9  -2   5    48.19    53.99     0.77 o
  10  -2   5    36.97    36.96     1.04 o
 -10  -1   5     2.96     2.63     0.39 o
  -9  -1   5    50.56    51.00     0.53 o
  -8  -1   5     3.49     3.02     0.15 o
  -7  -1   5    22.16    20.69     0.24 o
  -6  -1   5     0.79     0.66     0.08 o
  -4  -1   5     2.21     2.10     0.06 o
  -3  -1   5    99.74   100.25     0.65 o
  -2  -1   5     0.08     0.12     0.05 <
   0  -1   5     5.54     5.78     0.06 o
   1  -1   5    26.30    25.21     0.15 o
   2  -1   5     3.06     2.86     0.05 o
   3  -1   5    47.83    43.48     0.22 o
   4  -1   5     1.11     1.24     0.07 o
   6  -1   5     0.00     0.10     0.08 <
   7  -1   5   160.82   142.82     0.75 o
   8  -1   5   214.70   205.31     1.49 o
   9  -1   5    42.84    40.70     0.53 o
  10  -1   5     1.46     1.58     0.34 o
 -10   0   5   211.24   222.20     2.52 o
  -9   0   5    85.58    84.61     1.02 o
  -8   0   5     4.51     4.73     0.16 o
  -7   0   5     9.43     9.68     0.17 o
  -6   0   5     1.83     1.96     0.09 o
  -5   0   5     4.77     4.76     0.08 o
  -4   0   5     5.13     4.74     0.08 o
  -2   0   5  2045.41  2272.33    11.26 o
  -1   0   5    59.15    62.68     0.36 o
   0   0   5   225.80   237.04     1.29 o
   1   0   5     3.33     3.50     0.05 o
   3   0   5     0.04     0.02     0.04 <
   4   0   5     2.15     1.83     0.10 o
   5   0   5     0.22     0.23     0.06 o
   7   0   5     0.23     0.34     0.09 o
   8   0   5     1.17     1.37     0.12 o
   9   0   5     1.98     2.06     0.19 o
  10   0   5     9.09     9.83     0.40 o
 -10   1   5    65.22    65.87     1.43 o
  -9   1   5     0.69     0.59     0.25 <
  -8   1   5     8.89     8.41     0.24 o
  -7   1   5     0.25     0.19     0.10 <
  -6   1   5     0.30     0.39     0.08 o
  -5   1   5    56.93    54.22     0.29 o
  -4   1   5   313.09   310.84     1.42 o
  -3   1   5   767.41   868.10     3.63 o
  -2   1   5   306.65   324.44     1.25 o
  -1   1   5   155.89   159.28     0.72 o
   0   1   5    48.93    46.87     0.23 o
   1   1   5    40.43    39.15     0.21 o
   2   1   5    16.16    16.95     0.11 o
   8   1   5     0.98     0.86     0.12 o
   9   1   5    10.10    10.03     0.25 o
  10   1   5     0.34     0.58     0.29 <
 -10   2   5     0.24     0.17     0.46 <
  -9   2   5     5.27     4.88     0.30 o
  -8   2   5     0.95     0.56     0.19 <
  -7   2   5    15.21    16.17     0.28 o
  -6   2   5    13.01    12.63     0.18 o
  -5   2   5   379.69   357.01     1.64 o
  -2   2   5    19.16    21.00     0.11 o
  -1   2   5    18.91    17.74     0.10 o
   2   2   5    16.17    17.70     0.13 o
   4   2   5   549.79   557.37     2.35 o
   7   2   5     0.46     0.59     0.10 o
   8   2   5     3.34     3.26     0.14 o
   9   2   5     1.13     1.04     0.16 o
  10   2   5     0.80     0.55     0.34 <
 -10   3   5     1.34     1.39     0.52 <
  -9   3   5     0.07    -0.02     0.29 <
  -8   3   5     8.55     8.39     0.28 o
  -7   3   5     0.37     0.24     0.18 <
  -6   3   5   312.36   321.92     1.86 o
  -4   3   5     2.45     2.50     0.05 o
  -3   3   5    14.46    12.81     0.09 o
  -2   3   5    20.22    18.52     0.11 o
   0   3   5     7.59     8.22     0.06 o
   1   3   5    43.88    45.87     0.24 o
   3   3   5   349.61   388.21     2.27 o
   7   3   5     0.60     0.62     0.09 o
   8   3   5     3.21     2.84     0.14 o
   9   3   5     6.59     6.71     0.23 o
  10   3   5     0.28     0.97     0.23 o
  -9   4   5     2.21     0.96     0.45 <
  -8   4   5    17.17    17.77     0.51 o
  -7   4   5   815.01   851.85     9.28 o
  -6   4   5    56.91    58.15     0.56 o
  -5   4   5     2.05     1.85     0.09 o
  -4   4   5     1.95     1.90     0.05 o
  -3   4   5    22.73    20.95     0.12 o
  -2   4   5     4.63     4.78     0.06 o
   0   4   5    34.44    37.53     0.19 o
   1   4   5  4054.97  4523.74    20.24 o
   2   4   5   567.52   604.32     3.74 o
   3   4   5    25.50    26.14     0.22 o
   4   4   5     4.37     4.68     0.10 o
   5   4   5     0.06     0.30     0.07 o
   6   4   5     4.49     4.13     0.11 o
   7   4   5    13.04    14.32     0.19 o
   8   4   5     0.26     0.23     0.14 <
   9   4   5    51.42    53.42     0.54 o
  10   4   5   122.22   123.54     1.98 o
  -9   5   5     1.45     2.13     0.50 o
  -8   5   5   376.12   358.50     4.53 o
  -7   5   5    25.32    23.75     0.75 o
  -6   5   5     8.94     9.21     0.25 o
  -5   5   5     6.48     6.27     0.18 o
  -4   5   5     2.67     3.04     0.11 o
  -3   5   5     1.06     1.30     0.05 o
  -2   5   5   105.93   117.54     0.45 o
  -1   5   5     1.99     2.30     0.05 o
   0   5   5     2.10     2.22     0.05 o
   2   5   5   136.70   145.74     0.85 o
   3   5   5    18.81    20.48     0.20 o
   4   5   5     4.03     4.91     0.12 o
   5   5   5     2.46     2.05     0.10 o
   6   5   5    23.12    23.27     0.25 o
   7   5   5     0.03    -0.19     0.11 <
   8   5   5   194.60   198.57     1.38 o
   9   5   5    18.61    17.15     0.32 o
  10   5   5     0.60     0.40     0.32 <
  -8   6   5    19.48    19.38     0.76 o
  -7   6   5     3.65     4.21     0.46 o
  -6   6   5     0.12     0.04     0.20 <
  -5   6   5     0.40     0.32     0.19 <
  -4   6   5     0.43     0.30     0.12 <
  -3   6   5    39.73    39.50     0.33 o
  -2   6   5   272.47   299.91     1.14 o
   2   6   5     5.57     5.96     0.09 o
   3   6   5     0.02    -0.03     0.06 <
   4   6   5     1.34     1.52     0.07 o
   5   6   5     2.42     2.85     0.11 o
   6   6   5    72.74    73.30     0.53 o
   7   6   5   845.35   875.10     4.53 o
   8   6   5    97.92    97.25     0.78 o
   9   6   5     1.69     1.75     0.20 o
  10   6   5     1.15     0.94     0.36 <
  -7   7   5     0.00     0.29     0.32 <
  -6   7   5     6.29     6.81     0.41 o
  -5   7   5     6.92     7.39     0.40 o
  -4   7   5     1.47     1.24     0.21 o
  -3   7   5   286.36   316.77     2.65 o
  -2   7   5   438.84   459.14     2.54 o
   0   7   5     1.60     1.75     0.06 o
   1   7   5     2.35     2.24     0.06 o
   2   7   5     9.83     9.41     0.12 o
   3   7   5    41.03    42.26     0.28 o
   4   7   5    11.25    10.95     0.16 o
   5   7   5   234.56   238.60     1.35 o
   6   7   5    87.02    85.16     0.64 o
   7   7   5    12.91    13.99     0.27 o
   8   7   5    20.24    18.74     0.31 o
   9   7   5     0.17     0.38     0.26 <
  -6   8   5     0.03     0.29     0.24 <
  -5   8   5     3.56     2.88     0.35 o
  -4   8   5    41.98    47.90     0.94 o
  -3   8   5   641.02   636.44     5.03 o
  -2   8   5     0.06     0.05     0.12 <
  -1   8   5     3.41     3.82     0.13 o
   0   8   5    13.86    14.41     0.19 o
   1   8   5     8.80     9.32     0.13 o
   2   8   5    15.97    16.14     0.14 o
   3   8   5     0.08    -0.14     0.08 <
   4   8   5    13.01    11.78     0.16 o
   5   8   5     0.78     0.81     0.11 o
   6   8   5     0.64     0.31     0.13 <
   7   8   5     0.37     0.41     0.13 o
   8   8   5     1.15     0.93     0.19 o
   9   8   5     0.00     0.08     0.27 <
  -6   9   5    92.18    93.17     2.12 o
  -5   9   5   241.19   250.91     2.61 o
  -4   9   5    77.32    79.85     1.07 o
  -3   9   5     3.40     3.13     0.26 o
  -2   9   5     0.42     0.41     0.24 <
  -1   9   5     2.20     2.33     0.21 o
   0   9   5     0.12     0.14     0.12 <
   1   9   5     3.45     2.85     0.10 o
   2   9   5   110.72   113.24     0.71 o
   3   9   5   139.26   135.08     0.74 o
   4   9   5     0.97     1.15     0.12 o
   5   9   5     6.87     6.52     0.17 o
   6   9   5     5.06     5.01     0.17 o
   7   9   5     0.05     0.09     0.14 <
   8   9   5     0.48     0.40     0.26 <
  -5  10   5    26.39    25.52     0.93 o
  -4  10   5    15.22    14.99     0.44 o
  -3  10   5     0.06     0.08     0.25 <
  -2  10   5     3.06     2.65     0.33 o
  -1  10   5     0.79     0.55     0.23 <
   0  10   5     8.83     8.40     0.24 o
   1  10   5    44.63    45.98     0.65 o
   2  10   5   173.52   168.31     1.55 o
   3  10   5    82.02    78.85     0.64 o
   4  10   5     3.00     3.20     0.16 o
   5  10   5     0.15     0.35     0.13 <
   6  10   5     0.77     0.69     0.13 o
   7  10   5     0.15     0.18     0.22 <
  -3  11   5     1.90     1.90     0.47 o
  -1  11   5     1.94     2.06     0.34 o
   0  11   5    93.29    93.36     1.46 o
   1  11   5   714.36   717.50     5.02 o
   2  11   5     9.07     8.48     0.27 o
   3  11   5     2.35     2.30     0.20 o
   4  11   5     0.00    -0.01     0.13 <
   5  11   5     0.31     0.36     0.14 <
   6  11   5     1.04     1.01     0.25 o
   7  11   5     0.30     0.11     0.24 <
  -1  12   5    30.65    29.45     0.77 o
   0  12   5   275.63   264.98     3.37 o
   1  12   5     3.81     3.90     0.39 o
   2  12   5     4.30     3.95     0.24 o
   3  12   5     0.19     0.29     0.20 <
   4  12   5     0.23     0.51     0.20 <
   5  12   5     0.71     0.74     0.25 <
  -1  13   5    25.05    24.05     1.06 o
   0  13   5     0.00    -0.05     0.35 <
   1  13   5     9.04     8.37     0.50 o
   2  13   5     0.01    -0.01     0.34 <
   3  13   5     0.56     0.57     0.25 <
  -4 -11   6    33.81    31.76     0.48 o
  -3 -11   6    20.81    20.85     0.48 o
  -2 -11   6    57.55    58.17     0.74 o
  -1 -11   6     1.13     1.03     0.34 o
   0 -11   6     0.21     0.33     0.34 <
   1 -11   6     0.75     0.89     0.33 <
   2 -11   6     1.16     1.22     0.36 o
  -6 -10   6     0.03     0.22     0.23 <
  -5 -10   6    65.26    64.05     0.71 o
  -4 -10   6    77.22    79.54     0.63 o
  -3 -10   6    24.52    24.80     0.35 o
  -2 -10   6     0.49     0.47     0.19 <
  -1 -10   6     0.11    -0.12     0.18 <
   0 -10   6     1.04     0.93     0.23 o
   1 -10   6     0.60     0.55     0.30 <
   2 -10   6     0.19     0.41     0.31 <
   3 -10   6     8.31     9.22     0.68 o
  -7  -9   6     0.18     0.13     0.23 <
  -6  -9   6    92.38    90.39     1.14 o
  -5  -9   6   307.23   307.44     2.13 o
  -4  -9   6     3.27     3.47     0.18 o
  -3  -9   6     2.36     2.06     0.14 o
  -2  -9   6     0.38     0.28     0.11 <
  -1  -9   6     1.75     1.61     0.21 o
   0  -9   6     0.10     0.03     0.16 <
   1  -9   6     3.51     3.53     0.23 o
   2  -9   6   134.25   136.51     1.89 o
   3  -9   6    62.22    57.82     1.52 o
   4  -9   6    35.41    34.81     1.15 o
  -8  -8   6     0.19     0.13     0.29 <
  -7  -8   6    15.29    15.46     0.47 o
  -6  -8   6    15.60    16.46     0.31 o
  -5  -8   6     2.03     1.79     0.18 o
  -4  -8   6    15.51    16.10     0.34 o
  -3  -8   6     1.76     1.68     0.17 o
  -2  -8   6     6.21     6.00     0.16 o
  -1  -8   6     8.28     7.31     0.15 o
   0  -8   6     0.06     0.12     0.13 <
   1  -8   6   380.33   383.46     3.08 o
   2  -8   6     7.91     9.32     0.35 o
   3  -8   6     0.15    -0.08     0.28 <
   4  -8   6     4.92     4.56     0.29 o
   5  -8   6     5.38     4.79     0.37 o
  -8  -7   6   369.80   373.41     3.19 o
  -7  -7   6     9.60    11.06     0.30 o
  -6  -7   6     9.96    10.63     0.29 o
  -5  -7   6     9.80     9.68     0.21 o
  -4  -7   6     2.04     1.57     0.11 o
  -3  -7   6     0.07     0.05     0.09 <
  -2  -7   6     0.16     0.10     0.09 <
   0  -7   6  1121.53  1045.90     5.29 o
   1  -7   6   244.58   245.35     1.65 o
   2  -7   6    11.00    11.25     0.23 o
   3  -7   6    16.51    15.61     0.44 o
   4  -7   6     0.02     0.08     0.28 <
   5  -7   6     0.30     0.15     0.27 <
   6  -7   6     5.71     6.19     0.40 o
  -9  -6   6   448.38   449.92     4.32 o
  -8  -6   6     0.71     0.69     0.25 <
  -7  -6   6     0.39     0.72     0.17 o
  -6  -6   6     0.43     0.50     0.14 o
  -5  -6   6     2.37     2.22     0.13 o
  -4  -6   6     2.98     2.66     0.11 o
  -3  -6   6    90.41    84.57     0.45 o
  -2  -6   6     0.02     0.06     0.07 <
  -1  -6   6  1022.01   939.33     4.12 o
   0  -6   6    90.89    95.81     0.51 o
   1  -6   6    23.76    23.12     0.20 o
   2  -6   6     1.17     1.00     0.08 o
   3  -6   6     1.32     1.21     0.13 o
   4  -6   6     1.22     1.45     0.17 o
   5  -6   6    37.54    38.22     0.76 o
   6  -6   6    30.91    29.73     0.61 o
   7  -6   6    49.53    44.61     0.79 o
   8  -6   6    69.80    67.42     1.97 o
  -9  -5   6     5.55     6.65     0.54 o
  -8  -5   6    12.34    12.02     0.27 o
  -7  -5   6     6.43     6.68     0.18 o
  -6  -5   6     7.13     6.39     0.19 o
  -5  -5   6     0.63     0.51     0.11 o
  -4  -5   6    25.10    24.01     0.23 o
  -3  -5   6   161.05   169.61     0.91 o
  -2  -5   6   276.10   252.93     1.28 o
   0  -5   6    98.36    87.97     0.43 o
   1  -5   6     0.05     0.01     0.07 <
   2  -5   6    49.45    47.40     0.29 o
   3  -5   6     1.10     1.26     0.10 o
   4  -5   6     8.26     8.76     0.20 o
   5  -5   6    17.51    18.23     0.31 o
   6  -5   6   575.47   587.33     6.69 o
   7  -5   6     0.92     1.13     0.26 o
   8  -5   6     0.30     0.88     0.37 <
   9  -5   6     0.12     0.57     0.59 <
 -10  -4   6     0.01     0.12     0.33 <
  -9  -4   6     1.24     1.20     0.24 o
  -8  -4   6     1.90     1.77     0.15 o
  -7  -4   6     0.09     0.18     0.12 <
  -6  -4   6     2.68     2.25     0.13 o
  -5  -4   6     5.86     5.14     0.14 o
  -1  -4   6    44.56    40.62     0.24 o
   1  -4   6    10.73    11.16     0.10 o
   2  -4   6     1.20     1.20     0.05 o
   3  -4   6     6.58     6.32     0.08 o
   4  -4   6   243.47   239.23     1.50 o
   5  -4   6  1406.96  1417.50     8.09 o
   6  -4   6     0.01     0.04     0.19 <
   7  -4   6     1.65     1.27     0.24 o
   8  -4   6     1.73     1.92     0.27 o
   9  -4   6     0.21    -0.06     0.33 <
 -10  -3   6     0.00    -0.22     0.37 <
  -9  -3   6     5.93     6.30     0.23 o
  -8  -3   6     0.02     0.01     0.12 <
  -7  -3   6     1.60     1.82     0.12 o
  -6  -3   6     5.50     4.52     0.15 o
  -3  -3   6    17.93    19.70     0.17 o
  -2  -3   6    11.83    10.99     0.12 o
   0  -3   6     0.92     1.08     0.06 o
   1  -3   6    46.26    46.43     0.23 o
   2  -3   6    15.55    16.25     0.11 o
   3  -3   6  1277.10  1174.53     4.57 o
   5  -3   6     9.63     8.84     0.16 o
   6  -3   6     9.72    10.00     0.23 o
   7  -3   6     1.33     1.05     0.35 o
   8  -3   6     6.60     6.79     0.31 o
   9  -3   6     2.46     2.59     0.35 o
 -10  -2   6     0.03     0.33     0.37 <
  -9  -2   6     0.25     0.28     0.15 <
  -8  -2   6    15.58    16.49     0.25 o
  -7  -2   6     0.44     0.53     0.11 o
  -5  -2   6     0.01     0.06     0.07 <
  -3  -2   6     0.27     0.23     0.05 o
  -1  -2   6     0.01     0.02     0.05 <
   3  -2   6   182.87   170.93     0.69 o
   4  -2   6   111.85   107.11     0.58 o
   5  -2   6     4.12     3.78     0.10 o
   6  -2   6     3.60     3.32     0.12 o
   7  -2   6     1.57     1.66     0.15 o
   8  -2   6     8.52     8.52     0.32 o
   9  -2   6     0.16    -0.18     0.26 <
  10  -2   6   227.12   229.80     3.24 o
 -10  -1   6     3.99     3.59     0.41 o
  -9  -1   6     1.33     1.21     0.16 o
  -8  -1   6     7.71     7.68     0.19 o
  -7  -1   6    62.50    69.65     0.58 o
  -6  -1   6     2.54     2.03     0.09 o
  -4  -1   6     1.50     1.38     0.06 o
  -3  -1   6    64.98    67.70     0.42 o
  -2  -1   6     1.59     1.53     0.08 o
  -1  -1   6     9.90    10.11     0.10 o
   0  -1   6     2.26     2.36     0.06 o
   1  -1   6  4511.77  4783.17    19.68 o
   2  -1   6     1.09     1.00     0.04 o
   4  -1   6     0.68     0.71     0.06 o
   6  -1   6     0.20     0.31     0.08 o
   7  -1   6     3.64     3.15     0.12 o
   8  -1   6    25.29    23.98     0.33 o
   9  -1   6  1110.98  1113.34     7.76 o
  10  -1   6     6.53     6.70     0.43 o
 -10   0   6     2.86     2.80     0.40 o
  -9   0   6   180.52   182.55     1.79 o
  -8   0   6   132.32   138.07     0.93 o
  -7   0   6     5.12     5.07     0.14 o
  -6   0   6     7.23     7.54     0.12 o
  -5   0   6     0.02    -0.03     0.06 <
  -4   0   6     4.05     4.54     0.07 o
  -2   0   6    29.80    29.05     0.18 o
   0   0   6  1067.15  1136.92     5.37 o
   3   0   6     1.12     0.91     0.04 o
   4   0   6     0.00     0.03     0.08 <
   5   0   6     1.18     1.05     0.07 o
   7   0   6     0.05     0.11     0.10 <
   8   0   6   144.74   141.43     0.88 o
   9   0   6     5.04     4.65     0.23 o
  10   0   6    29.13    30.32     0.61 o
 -10   1   6   438.76   446.47     5.57 o
  -9   1   6     1.97     2.17     0.33 o
  -8   1   6     5.67     5.56     0.25 o
  -7   1   6     1.22     1.17     0.11 o
  -6   1   6     0.06     0.13     0.08 <
  -5   1   6    13.59    12.97     0.13 o
  -4   1   6    86.81    87.86     0.51 o
  -2   1   6   721.74   741.88     2.99 o
  -1   1   6   329.26   353.08     1.63 o
   0   1   6     6.59     6.03     0.06 o
   1   1   6    29.07    29.35     0.17 o
   2   1   6    25.33    24.98     0.15 o
   3   1   6    41.77    44.16     0.30 o
   5   1   6    10.72    12.03     0.13 o
   8   1   6     0.15     0.09     0.12 <
   9   1   6    24.57    22.83     0.48 o
  10   1   6     0.02    -0.26     0.34 <
 -10   2   6     0.86     0.51     0.50 <
  -9   2   6    19.05    19.84     0.56 o
  -8   2   6     0.62     0.83     0.23 o
  -7   2   6    18.50    18.13     0.30 o
  -6   2   6     3.97     4.12     0.11 o
  -5   2   6    66.24    62.85     0.32 o
  -3   2   6   647.86   652.14     2.34 o
   0   2   6    30.95    33.57     0.18 o
   3   2   6     4.22     4.03     0.08 o
   4   2   6     0.03     0.02     0.05 <
   7   2   6     2.25     2.26     0.12 o
   8   2   6     3.10     3.50     0.16 o
   9   2   6     1.91     1.88     0.17 o
  10   2   6     2.05     2.34     0.37 o
 -10   3   6     5.11     4.48     0.56 o
  -9   3   6     0.03    -0.01     0.30 <
  -8   3   6     7.15     7.75     0.31 o
  -7   3   6     0.18    -0.06     0.18 <
  -6   3   6     2.09     2.02     0.12 o
  -4   3   6  2690.07  2652.30     8.65 o
  -3   3   6    35.79    33.39     0.16 o
   0   3   6    17.04    18.39     0.11 o
   1   3   6    15.19    15.38     0.12 o
   2   3   6   115.54   129.28     0.74 o
   7   3   6     0.04     0.08     0.10 <
   8   3   6     6.92     6.19     0.19 o
   9   3   6     4.75     5.47     0.23 o
  10   3   6     0.52     0.61     0.34 <
  -9   4   6     2.25     3.16     0.50 o
  -8   4   6    14.43    14.11     0.46 o
  -7   4   6     0.13    -0.06     0.24 <
  -6   4   6   100.81   101.83     0.78 o
  -5   4   6   175.09   180.66     1.04 o
  -4   4   6     1.53     1.57     0.06 o
  -3   4   6    25.45    23.38     0.13 o
  -2   4   6     0.13     0.13     0.04 o
  -1   4   6    28.98    32.16     0.15 o
   0   4   6    32.88    36.41     0.17 o
   1   4   6    77.23    78.87     0.41 o
   2   4   6   198.21   209.79     1.17 o
   4   4   6     8.94     9.19     0.13 o
   6   4   6     7.42     6.80     0.13 o
   7   4   6     6.70     7.32     0.16 o
   8   4   6     0.15    -0.04     0.13 <
   9   4   6     0.34     0.35     0.16 <
  10   4   6    45.08    44.80     0.88 o
  -9   5   6     2.63     2.13     0.49 o
  -8   5   6     8.72     7.83     0.56 o
  -7   5   6    39.22    36.10     0.91 o
  -6   5   6    67.60    65.17     0.77 o
  -5   5   6     0.07     0.08     0.13 <
  -4   5   6     1.73     1.61     0.08 o
  -3   5   6    18.01    19.04     0.12 o
  -2   5   6    31.73    32.82     0.17 o
  -1   5   6     3.94     4.42     0.06 o
   0   5   6     0.78     0.94     0.05 o
   1   5   6     0.58     0.70     0.05 o
   2   5   6  1797.57  2008.39     8.65 o
   3   5   6     1.83     1.97     0.08 o
   5   5   6    13.22    11.54     0.17 o
   6   5   6     7.77     8.01     0.15 o
   7   5   6     0.05     0.10     0.11 <
   8   5   6     5.84     6.13     0.21 o
   9   5   6    36.91    34.88     0.50 o
  10   5   6    15.22    15.64     0.52 o
  -9   6   6    57.08    54.47     1.85 o
  -8   6   6   191.28   198.73     2.86 o
  -7   6   6     8.34     9.46     0.56 o
  -6   6   6     6.25     7.94     0.47 o
  -5   6   6     2.55     2.23     0.19 o
  -4   6   6     0.00     0.06     0.13 <
  -3   6   6     7.52     7.36     0.12 o
  -2   6   6    29.01    31.47     0.19 o
   0   6   6  1124.04  1233.14     4.79 o
   2   6   6    11.54    11.75     0.12 o
   3   6   6     0.53     0.85     0.08 o
   4   6   6     0.00     0.14     0.08 <
   5   6   6     2.64     2.59     0.11 o
   6   6   6     7.95     8.88     0.17 o
   7   6   6     6.92     7.48     0.19 o
   8   6   6   158.57   156.75     1.13 o
   9   6   6     5.96     5.54     0.43 o
  10   6   6     0.18     0.12     0.33 <
  -7   7   6     0.25     1.41     0.60 <
  -6   7   6     1.03     1.01     0.31 o
  -5   7   6     3.16     3.09     0.33 o
  -4   7   6     1.31     1.44     0.18 o
  -3   7   6    12.65    12.66     0.22 o
  -2   7   6    75.29    80.03     0.58 o
  -1   7   6   211.42   218.37     0.95 o
   0   7   6     4.77     5.19     0.09 o
   1   7   6    12.64    13.31     0.12 o
   2   7   6     5.85     5.38     0.11 o
   3   7   6    35.05    37.31     0.29 o
   4   7   6     7.23     6.88     0.13 o
   5   7   6    12.16    12.34     0.19 o
   6   7   6    22.20    22.01     0.28 o
   7   7   6    48.87    45.02     0.44 o
   8   7   6   114.11   113.51     0.89 o
   9   7   6     0.66     0.65     0.25 <
  -6   8   6     1.29     1.37     0.33 o
  -5   8   6     0.01    -0.13     0.29 <
  -4   8   6     0.90     0.89     0.28 o
  -3   8   6   663.86   659.16     5.23 o
  -2   8   6    42.84    48.20     0.53 o
  -1   8   6     5.94     6.43     0.15 o
   0   8   6    31.69    33.86     0.36 o
   1   8   6     2.95     3.18     0.10 o
   2   8   6     5.35     5.53     0.10 o
   3   8   6     0.01    -0.06     0.08 <
   4   8   6     0.01     0.05     0.09 <
   5   8   6    23.67    23.41     0.30 o
   6   8   6   361.66   371.03     2.17 o
   7   8   6     1.80     1.50     0.15 o
   8   8   6    18.03    18.64     0.49 o
   9   8   6     0.04     0.30     0.27 <
  -6   9   6    11.41    12.88     0.72 o
  -5   9   6     2.55     2.05     0.27 o
  -4   9   6   390.43   389.30     3.76 o
  -3   9   6    18.56    21.34     0.48 o
  -2   9   6     3.45     3.43     0.29 o
  -1   9   6     0.69     0.85     0.17 o
   0   9   6     0.09     0.02     0.12 <
   1   9   6     1.36     1.17     0.10 o
   2   9   6    36.31    37.16     0.30 o
   3   9   6     3.10     3.23     0.11 o
   4   9   6    14.97    15.33     0.23 o
   5   9   6   267.02   269.09     1.53 o
   6   9   6     4.14     4.54     0.17 o
   7   9   6     0.01    -0.05     0.15 <
   8   9   6     0.33     0.66     0.27 <
  -5  10   6    58.19    62.20     1.56 o
  -4  10   6   123.51   125.60     1.50 o
  -3  10   6     9.19     9.62     0.63 o
  -2  10   6     2.56     2.19     0.48 o
  -1  10   6     2.22     2.31     0.26 o
   0  10   6     8.11     8.31     0.24 o
   1  10   6    15.65    14.91     0.54 o
   2  10   6    19.38    19.17     0.45 o
   3  10   6   317.88   313.58     1.97 o
   4  10   6    39.28    40.55     0.43 o
   5  10   6     0.23     0.35     0.12 <
   6  10   6     1.76     1.82     0.14 o
   7  10   6     1.83     2.19     0.24 o
  -3  11   6     2.50     2.42     0.49 o
  -2  11   6     0.11     0.18     0.45 <
  -1  11   6     5.08     5.41     0.40 o
   0  11   6     0.48     0.80     0.31 <
   1  11   6   180.51   183.02     1.65 o
   2  11   6   444.16   434.65     3.54 o
   3  11   6    21.11    21.07     0.39 o
   4  11   6     0.00     0.13     0.12 <
   5  11   6     1.39     1.15     0.15 o
   6  11   6     1.46     1.33     0.22 o
  -1  12   6     0.08    -0.07     0.33 <
   0  12   6   206.60   205.49     2.74 o
   1  12   6     0.14     0.34     0.33 <
   2  12   6     5.77     6.05     0.27 o
   3  12   6     3.35     3.06     0.23 o
   4  12   6     0.41     0.45     0.20 <
   5  12   6     0.09     0.30     0.21 <
   0  13   6     0.14    -0.37     0.37 <
   1  13   6     2.08     2.22     0.40 o
   2  13   6     1.81     2.22     0.37 o
   3  13   6     0.05    -0.01     0.23 <
  -4 -11   7    13.49    13.17     0.32 o
  -3 -11   7     0.03     0.12     0.21 <
  -2 -11   7   170.31   172.02     1.62 o
  -1 -11   7    18.36    19.89     0.65 o
   0 -11   7     1.29     0.91     0.34 <
   1 -11   7     0.04     0.08     0.33 <
   2 -11   7     0.03     0.14     0.34 <
  -5 -10   7    14.69    14.72     0.33 o
  -4 -10   7     0.03    -0.01     0.16 <
  -3 -10   7    90.35    90.48     0.87 o
  -2 -10   7    30.15    29.14     0.48 o
  -1 -10   7     5.08     5.01     0.24 o
   0 -10   7     2.27     1.57     0.24 o
   1 -10   7     0.29     0.70     0.30 <
   2 -10   7     0.72     0.17     0.30 <
   3 -10   7     3.97     2.83     0.54 o
   4 -10   7     2.32     2.04     0.55 o
  -7  -9   7     1.84     2.21     0.31 o
  -6  -9   7    11.64    12.42     0.39 o
  -5  -9   7    30.88    30.06     0.41 o
  -4  -9   7   336.99   338.79     2.14 o
  -3  -9   7    39.34    39.27     0.38 o
  -2  -9   7     0.63     0.81     0.11 o
  -1  -9   7     0.59     0.32     0.21 <
   0  -9   7     0.19     0.59     0.25 <
   1  -9   7     0.47     0.60     0.18 o
   2  -9   7     9.87     9.11     0.42 o
   3  -9   7     8.80     8.09     0.62 o
   4  -9   7   451.99   454.12     7.54 o
  -7  -8   7     0.73     0.57     0.28 <
  -6  -8   7     5.24     5.17     0.23 o
  -5  -8   7   399.82   405.63     2.98 o
  -4  -8   7    12.72    13.12     0.31 o
  -3  -8   7     0.04     0.20     0.13 <
  -2  -8   7     0.01    -0.10     0.11 <
  -1  -8   7     6.64     6.14     0.16 o
   0  -8   7     1.75     1.69     0.14 o
   1  -8   7    17.88    17.08     0.36 o
   2  -8   7    23.93    26.01     0.61 o
   3  -8   7     2.32     1.95     0.31 o
   4  -8   7     6.06     6.22     0.41 o
   5  -8   7     9.73     9.24     0.45 o
  -8  -7   7     4.07     3.91     0.36 o
  -7  -7   7     1.26     1.01     0.25 o
  -6  -7   7   512.91   518.63     3.43 o
  -5  -7   7     3.46     3.67     0.22 o
  -4  -7   7     7.24     6.72     0.17 o
  -3  -7   7     0.34     0.43     0.11 o
  -2  -7   7     0.01     0.15     0.09 <
  -1  -7   7     1.83     1.49     0.09 o
   0  -7   7     5.75     5.80     0.12 o
   1  -7   7   111.85   107.64     0.75 o
   4  -7   7     0.01    -0.03     0.25 <
   5  -7   7     0.10     0.36     0.23 <
   6  -7   7     3.38     2.99     0.35 o
   7  -7   7     0.04     0.76     0.51 <
  -9  -6   7    47.53    46.79     0.72 o
  -8  -6   7    96.12   100.36     1.33 o
  -7  -6   7    18.16    16.61     0.35 o
  -6  -6   7     2.76     2.72     0.16 o
  -5  -6   7     0.28     0.35     0.11 o
  -4  -6   7     3.38     3.12     0.12 o
  -3  -6   7    10.33     9.89     0.14 o
  -2  -6   7     0.37     0.50     0.07 o
   0  -6   7   205.09   228.37     1.13 o
   1  -6   7    85.12    75.92     0.52 o
   2  -6   7     1.99     1.85     0.13 o
   3  -6   7     2.79     2.61     0.18 o
   4  -6   7     4.08     3.91     0.27 o
   5  -6   7    13.45    13.47     0.40 o
   6  -6   7     6.34     5.45     0.33 o
   7  -6   7     0.98     0.80     0.37 <
   8  -6   7   156.05   158.81     2.35 o
  -9  -5   7     1.71     1.68     0.46 o
  -8  -5   7    59.92    61.78     0.67 o
  -7  -5   7    15.97    16.03     0.26 o
  -6  -5   7     1.25     1.18     0.14 o
  -5  -5   7     0.66     0.62     0.11 o
  -4  -5   7     0.84     0.93     0.10 o
  -3  -5   7    23.66    24.44     0.21 o
  -2  -5   7    24.17    23.17     0.21 o
  -1  -5   7   421.21   421.94     1.97 o
   1  -5   7     0.11     0.30     0.06 o
   2  -5   7    39.94    38.54     0.33 o
   3  -5   7     1.41     1.42     0.10 o
   4  -5   7     0.43     0.47     0.11 o
   5  -5   7     2.33     1.90     0.24 o
   6  -5   7    21.00    21.00     0.50 o
   7  -5   7     9.77    10.48     0.40 o
   8  -5   7    13.36    13.28     0.59 o
  -9  -4   7     6.27     4.48     0.49 o
  -8  -4   7     2.91     2.55     0.16 o
  -7  -4   7     0.34     0.23     0.12 <
  -6  -4   7     1.63     1.31     0.13 o
  -5  -4   7     7.66     7.34     0.15 o
  -4  -4   7     1.48     1.04     0.08 o
  -3  -4   7   666.15   592.30     2.88 o
  -2  -4   7  1719.51  1579.18     7.89 o
  -1  -4   7   118.82   107.27     0.51 o
   1  -4   7    12.88    11.79     0.12 o
   2  -4   7     0.87     0.88     0.06 o
   3  -4   7     0.80     0.56     0.08 o
   4  -4   7    22.55    23.14     0.33 o
   5  -4   7   432.05   426.03     3.07 o
   6  -4   7     0.49     0.22     0.24 <
   7  -4   7    16.05    15.45     0.45 o
   8  -4   7     6.86     7.04     0.36 o
   9  -4   7     0.26     0.70     0.37 <
 -10  -3   7     0.09     0.51     0.37 <
  -9  -3   7    10.50    10.88     0.25 o
  -8  -3   7     0.12     0.07     0.13 <
  -7  -3   7     2.17     2.05     0.13 o
  -6  -3   7     3.57     3.22     0.14 o
  -5  -3   7     0.18     0.18     0.09 <
  -3  -3   7   103.24   101.06     0.54 o
  -2  -3   7     2.71     2.48     0.07 o
   1  -3   7    22.13    23.10     0.16 o
   2  -3   7    24.07    23.73     0.18 o
   3  -3   7    25.90    24.26     0.22 o
   4  -3   7    76.70    85.36     0.52 o
   5  -3   7   189.08   187.05     1.34 o
   6  -3   7     8.66     8.80     0.25 o
   7  -3   7     6.24     7.20     0.33 o
   8  -3   7     0.72     0.74     0.24 o
   9  -3   7     1.81     1.70     0.35 o
 -10  -2   7     0.74     0.85     0.38 <
  -9  -2   7     0.13     0.26     0.15 <
  -8  -2   7     2.89     3.12     0.16 o
  -7  -2   7     0.28     0.27     0.12 <
  -6  -2   7     0.04     0.05     0.10 <
  -5  -2   7     0.16     0.24     0.07 o
  -3  -2   7     0.09     0.06     0.06 <
  -1  -2   7     1.17     1.15     0.07 o
   0  -2   7    41.27    43.46     0.34 o
   3  -2   7   252.42   230.80     1.07 o
   4  -2   7  1977.01  1915.11     8.99 o
   5  -2   7     0.18     0.25     0.07 o
   6  -2   7    13.97    13.46     0.21 o
   7  -2   7     0.01     0.06     0.17 <
   8  -2   7     6.56     7.78     0.32 o
   9  -2   7     0.36     0.14     0.21 <
  10  -2   7     0.57     0.56     0.47 <
 -10  -1   7     4.26     4.42     0.43 o
  -9  -1   7     0.27     0.25     0.14 <
  -8  -1   7     0.52     0.57     0.13 o
  -7  -1   7     8.64    10.06     0.24 o
  -4  -1   7     1.06     0.70     0.06 o
  -3  -1   7    35.25    37.01     0.27 o
  -2  -1   7     4.41     4.18     0.11 o
  -1  -1   7    46.69    41.65     0.37 o
   0  -1   7     1.85     1.87     0.06 o
   1  -1   7   330.07   327.92     1.45 o
   2  -1   7     0.07     0.19     0.05 o
   3  -1   7   647.42   595.18     2.72 o
   4  -1   7     0.16     0.19     0.05 o
   5  -1   7     0.04     0.17     0.06 <
   6  -1   7     0.42     0.53     0.08 o
   7  -1   7     0.28     0.39     0.10 o
   8  -1   7     2.30     2.51     0.19 o
   9  -1   7    52.11    51.41     0.83 o
  10  -1   7    71.02    72.93     1.15 o
 -10   0   7     0.94     0.87     0.47 <
  -9   0   7     2.83     2.61     0.25 o
  -8   0   7    73.71    77.46     0.58 o
  -6   0   7     9.77    10.45     0.14 o
  -5   0   7     9.04     8.82     0.12 o
  -4   0   7     0.09     0.33     0.05 o
  -1   0   7     0.63     0.63     0.05 o
   1   0   7    24.02    26.80     0.18 o
   3   0   7     7.84     7.18     0.09 o
   4   0   7     8.69     8.45     0.10 o
   5   0   7     3.09     2.84     0.07 o
   6   0   7     0.04     0.08     0.07 <
   7   0   7     0.60     0.69     0.10 o
   8   0   7    43.56    41.22     0.35 o
   9   0   7     0.01     0.00     0.22 <
  10   0   7   138.26   148.87     1.85 o
 -10   1   7     2.20     1.89     0.51 o
  -9   1   7    17.52    17.61     0.54 o
  -8   1   7     4.50     4.18     0.22 o
  -7   1   7     3.82     3.72     0.14 o
  -6   1   7     1.18     0.82     0.09 o
  -5   1   7     7.03     6.33     0.10 o
  -4   1   7    34.45    34.58     0.21 o
  -3   1   7     8.51     7.82     0.11 o
  -2   1   7     0.20     0.16     0.04 o
   0   1   7   957.71  1011.48     4.36 o
   1   1   7    10.10    10.69     0.10 o
   2   1   7    63.31    61.01     0.38 o
   3   1   7    40.76    36.67     0.25 o
   4   1   7     0.00     0.08     0.07 <
   6   1   7     1.08     1.16     0.08 o
   7   1   7   100.79    90.41     0.58 o
   8   1   7   184.86   174.34     1.06 o
   9   1   7    58.22    55.88     0.78 o
  10   1   7     2.31     2.32     0.37 o
 -10   2   7    35.67    39.20     1.10 o
  -9   2   7   173.93   177.27     2.05 o
  -8   2   7     0.14    -0.03     0.21 <
  -7   2   7    17.06    17.24     0.35 o
  -6   2   7     5.08     5.03     0.12 o
  -5   2   7    19.96    18.74     0.15 o
  -4   2   7     1.49     1.02     0.07 o
  -3   2   7     0.47     0.10     0.05 <
  -2   2   7   429.48   475.32     1.94 o
  -1   2   7    86.99    92.52     0.38 o
   0   2   7    64.48    68.54     0.34 o
   1   2   7    27.52    30.98     0.17 o
   3   2   7     0.01     0.01     0.05 <
   4   2   7     0.00     0.02     0.06 <
   5   2   7     7.62     6.72     0.11 o
   7   2   7   115.36   109.31     0.70 o
   8   2   7     3.41     3.69     0.21 o
   9   2   7     1.28     1.41     0.17 o
  10   2   7     4.50     5.03     0.40 o
 -10   3   7    38.54    37.81     1.08 o
  -9   3   7     3.74     4.04     0.36 o
  -8   3   7     7.75     8.78     0.33 o
  -7   3   7     0.09    -0.04     0.21 <
  -6   3   7     0.11     0.02     0.11 <
  -5   3   7     0.53     0.33     0.08 o
  -4   3   7   259.22   257.88     1.08 o
  -2   3   7    54.17    59.17     0.28 o
  -1   3   7    86.82    93.72     0.40 o
   0   3   7    17.66    18.82     0.11 o
   1   3   7     0.63     0.70     0.04 o
   2   3   7    51.09    51.66     0.34 o
   3   3   7    14.87    15.74     0.15 o
   7   3   7     0.17     0.23     0.10 <
   8   3   7     9.50     8.30     0.21 o
   9   3   7     3.33     3.65     0.21 o
  10   3   7     0.20    -0.12     0.34 <
  -9   4   7     3.14     3.08     0.51 o
  -8   4   7     7.80     7.30     0.39 o
  -7   4   7     0.99     1.20     0.27 o
  -6   4   7     2.01     1.77     0.15 o
  -5   4   7   114.39   111.11     0.70 o
  -4   4   7   248.82   221.51     0.90 o
  -3   4   7    32.45    30.61     0.16 o
  -1   4   7    13.30    14.11     0.09 o
   0   4   7    22.14    23.68     0.14 o
   6   4   7    11.75    10.66     0.17 o
   7   4   7     4.80     5.67     0.15 o
   8   4   7     0.01     0.02     0.13 <
   9   4   7     1.66     1.77     0.17 o
  10   4   7     2.90     3.27     0.38 o
  -9   5   7     1.23     0.79     0.46 <
  -8   5   7     4.22     3.43     0.47 o
  -7   5   7     0.24     0.42     0.27 <
  -6   5   7    50.17    49.84     0.87 o
  -5   5   7   327.91   333.66     2.07 o
  -4   5   7     0.03     0.07     0.08 <
  -3   5   7    66.92    68.55     0.30 o
  -2   5   7    20.56    19.91     0.12 o
  -1   5   7     6.52     7.10     0.07 o
   0   5   7     1.23     1.52     0.05 o
   1   5   7     1.59     1.87     0.07 o
   2   5   7   829.59   935.47     3.92 o
   5   5   7    49.24    46.97     0.38 o
   6   5   7     2.97     3.09     0.12 o
   7   5   7     1.53     1.24     0.12 o
   8   5   7     6.31     6.24     0.21 o
   9   5   7     3.57     3.44     0.21 o
  10   5   7     0.05    -0.16     0.31 <
  -8   6   7    11.12    11.74     0.64 o
  -7   6   7    65.61    66.77     1.30 o
  -6   6   7   188.03   206.30     3.60 o
  -5   6   7     1.63     1.41     0.16 o
  -4   6   7     0.97     1.15     0.13 o
  -3   6   7     5.63     5.56     0.10 o
  -2   6   7     1.55     1.69     0.06 o
  -1   6   7     0.19     0.09     0.05 <
   2   6   7   619.51   683.07     2.78 o
   3   6   7     3.23     2.80     0.10 o
   4   6   7     1.97     1.37     0.09 o
   5   6   7     1.24     1.05     0.10 o
   6   6   7     0.48     0.65     0.11 o
   7   6   7     0.47     0.69     0.13 o
   8   6   7     1.48     1.23     0.15 o
   9   6   7     6.84     5.33     0.42 o
  10   6   7   183.69   186.97     2.13 o
  -6   7   7     0.16     0.02     0.30 <
  -5   7   7     1.29     1.51     0.23 o
  -4   7   7     6.47     6.95     0.25 o
  -3   7   7     0.27     0.46     0.11 o
  -2   7   7     5.20     5.87     0.13 o
  -1   7   7    19.39    21.53     0.16 o
   0   7   7     1.03     1.14     0.09 o
   1   7   7    78.37    83.13     0.43 o
   2   7   7    24.08    25.04     0.22 o
   3   7   7    35.20    38.23     0.32 o
   4   7   7     9.86     9.84     0.16 o
   5   7   7     0.75     1.02     0.11 o
   6   7   7     1.91     2.18     0.14 o
   7   7   7     2.17     1.81     0.14 o
   8   7   7   267.70   263.86     1.75 o
   9   7   7     7.05     7.53     0.35 o
  -6   8   7     2.46     2.49     0.36 o
  -5   8   7     0.74     1.33     0.31 o
  -4   8   7     0.42     0.48     0.27 <
  -3   8   7    26.24    25.72     0.46 o
  -1   8   7    26.41    27.99     0.29 o
   0   8   7    97.38   107.05     0.65 o
   1   8   7     1.06     0.99     0.08 o
   2   8   7     1.84     2.20     0.10 o
   3   8   7     3.23     3.19     0.12 o
   4   8   7     0.05     0.13     0.08 <
   5   8   7     0.30     0.28     0.11 <
   6   8   7    54.95    59.20     0.51 o
   7   8   7    73.00    74.82     0.66 o
   8   8   7   102.63   103.50     1.29 o
   9   8   7     8.21     7.30     0.37 o
  -5   9   7     1.55     0.95     0.28 o
  -4   9   7     0.46     0.13     0.24 <
  -3   9   7    34.40    36.86     0.56 o
  -2   9   7    40.56    41.82     0.65 o
  -1   9   7     0.31     0.48     0.17 <
   0   9   7     0.37     0.40     0.13 <
   1   9   7     1.02     0.88     0.09 o
   2   9   7    15.23    15.16     0.18 o
   3   9   7     4.48     4.65     0.13 o
   4   9   7     1.30     1.09     0.11 o
   5   9   7   148.12   147.60     0.93 o
   6   9   7     7.69     6.49     0.17 o
   7   9   7     0.02     0.31     0.16 <
   8   9   7     8.77     8.43     0.38 o
  -5  10   7     0.15    -0.08     0.42 <
  -4  10   7   380.18   380.37     4.55 o
  -3  10   7   248.43   245.19     4.40 o
  -2  10   7     0.18     0.34     0.29 <
  -1  10   7     2.38     2.62     0.23 o
   0  10   7     3.76     4.11     0.19 o
   1  10   7     3.43     4.13     0.27 o
   2  10   7     5.68     5.66     0.20 o
   3  10   7     0.46     0.42     0.13 o
   4  10   7    75.95    76.36     0.53 o
   5  10   7    31.29    31.40     0.33 o
   6  10   7     0.54     0.20     0.13 <
   7  10   7     5.16     4.77     0.27 o
  -3  11   7     1.43     1.14     0.46 <
  -2  11   7     1.24     0.70     0.31 <
  -1  11   7     3.07     3.07     0.37 o
   0  11   7     0.75     0.85     0.32 <
   1  11   7    20.77    21.02     0.47 o
   2  11   7    35.19    35.89     0.53 o
   3  11   7    54.21    54.52     0.58 o
   4  11   7     4.33     4.63     0.17 o
   5  11   7     3.56     3.39     0.16 o
   6  11   7     3.25     3.26     0.24 o
  -1  12   7     0.21    -0.04     0.35 <
   0  12   7    11.89    10.75     0.52 o
   1  12   7    22.09    21.90     0.67 o
   2  12   7   167.62   159.67     1.77 o
   3  12   7    12.74    12.06     0.34 o
   4  12   7     7.58     7.05     0.29 o
   5  12   7     0.02     0.10     0.19 <
  -1  13   7     0.53     0.60     0.52 <
   0  13   7    16.26    16.35     0.64 o
   1  13   7   775.29   745.77     8.47 o
   2  13   7     4.05     3.90     0.43 o
   3  13   7     2.62     2.59     0.29 o
  -3 -11   8     0.31     0.25     0.22 <
  -2 -11   8     3.32     3.74     0.26 o
  -1 -11   8    41.56    43.21     0.74 o
   0 -11   8    73.93    75.29     1.32 o
   1 -11   8     0.18     0.54     0.33 <
  -5 -10   8     8.00     8.32     0.28 o
  -4 -10   8     0.33     0.29     0.18 <
  -3 -10   8     0.17     0.17     0.17 <
  -2 -10   8     1.70     2.08     0.22 o
  -1 -10   8   351.75   355.90     2.95 o
   0 -10   8     6.17     5.75     0.31 o
   1 -10   8     1.95     2.80     0.35 o
   2 -10   8     1.69     1.58     0.34 o
   3 -10   8     2.42     2.88     0.58 o
  -6  -9   8     3.92     4.09     0.29 o
  -5  -9   8     7.00     7.48     0.28 o
  -4  -9   8    12.01    11.95     0.24 o
  -3  -9   8   148.60   153.59     1.08 o
  -2  -9   8    29.74    29.24     0.34 o
  -1  -9   8     0.00     0.12     0.21 <
   0  -9   8     2.37     2.63     0.24 o
   1  -9   8     0.00    -0.26     0.27 <
   2  -9   8     0.89     1.04     0.25 o
   3  -9   8     3.21     3.37     0.38 o
   4  -9   8     9.34     9.16     0.70 o
  -7  -8   8     0.06     0.35     0.28 <
  -6  -8   8     2.48     2.88     0.25 o
  -5  -8   8    75.37    76.57     0.78 o
  -4  -8   8    16.61    15.97     0.31 o
  -3  -8   8     2.51     2.72     0.15 o
  -2  -8   8    10.02    10.18     0.21 o
  -1  -8   8     9.45     9.15     0.21 o
   0  -8   8     6.66     6.85     0.20 o
   1  -8   8     5.08     5.17     0.22 o
   2  -8   8     6.86     6.67     0.39 o
   3  -8   8     1.39     1.11     0.31 o
   4  -8   8     0.64     0.52     0.32 <
   5  -8   8    81.24    83.20     1.40 o
   6  -8   8     0.00     0.15     0.53 <
  -8  -7   8     5.56     5.44     0.39 o
  -7  -7   8     1.46     1.51     0.34 o
  -6  -7   8   345.61   350.88     2.42 o
  -5  -7   8   165.16   165.21     1.54 o
  -4  -7   8    19.24    19.04     0.27 o
  -3  -7   8     7.18     7.50     0.16 o
  -2  -7   8     0.02     0.12     0.09 <
  -1  -7   8     0.02     0.06     0.08 <
   0  -7   8     0.03    -0.08     0.08 <
   1  -7   8     1.09     1.42     0.13 o
   4  -7   8     0.10     0.52     0.29 <
   5  -7   8     3.37     3.49     0.27 o
   6  -7   8     3.25     2.93     0.55 o
   7  -7   8     0.31     0.74     0.53 <
  -8  -6   8     1.17     0.73     0.31 <
  -7  -6   8    36.58    37.49     0.53 o
  -6  -6   8    93.74    91.43     0.81 o
  -5  -6   8     1.51     1.39     0.12 o
  -4  -6   8     1.52     1.71     0.11 o
  -3  -6   8     0.02     0.11     0.08 <
  -2  -6   8     1.61     1.81     0.10 o
  -1  -6   8    37.85    34.08     0.26 o
   0  -6   8     1.23     1.29     0.08 o
   1  -6   8    95.37    88.86     0.56 o
   2  -6   8   125.24   127.21     1.03 o
   3  -6   8     0.95     0.85     0.20 o
   4  -6   8     6.99     6.60     0.33 o
   5  -6   8     6.90     7.09     0.33 o
   6  -6   8     2.51     2.10     0.28 o
   7  -6   8     1.34     1.70     0.41 o
   8  -6   8     0.44     1.25     0.42 <
  -9  -5   8     0.93     1.34     0.34 o
  -8  -5   8   303.29   312.56     2.39 o
  -7  -5   8   195.28   197.09     1.27 o
  -6  -5   8     5.47     5.44     0.18 o
  -5  -5   8     0.97     0.83     0.12 o
  -4  -5   8     2.55     2.17     0.11 o
  -3  -5   8     5.43     5.83     0.12 o
  -2  -5   8     1.21     1.29     0.06 o
  -1  -5   8     0.51     0.51     0.07 o
   2  -5   8    14.74    14.18     0.13 o
   3  -5   8     1.10     1.06     0.10 o
   4  -5   8     1.13     1.21     0.13 o
   5  -5   8     1.28     1.12     0.19 o
   6  -5   8     2.18     2.36     0.27 o
   7  -5   8     0.00    -0.03     0.26 <
   8  -5   8    17.74    16.72     0.66 o
  -9  -4   8   117.11   116.32     1.92 o
  -8  -4   8    32.98    31.48     0.39 o
  -7  -4   8     0.23     0.30     0.14 <
  -6  -4   8     3.54     3.31     0.16 o
  -5  -4   8     3.87     3.71     0.13 o
  -4  -4   8     0.65     0.70     0.09 o
  -3  -4   8    73.56    67.70     0.42 o
  -2  -4   8   263.60   236.76     1.15 o
  -1  -4   8  1190.91  1071.22     4.66 o
   2  -4   8     1.68     1.89     0.06 o
   4  -4   8     8.29     8.34     0.19 o
   5  -4   8    60.14    59.62     0.55 o
   6  -4   8     0.18     0.41     0.24 <
   7  -4   8    29.69    28.50     0.59 o
   8  -4   8    55.89    52.18     0.86 o
   9  -4   8     0.14     0.31     0.40 <
  -9  -3   8    18.09    19.64     0.50 o
  -8  -3   8     0.13     0.04     0.14 <
  -7  -3   8    10.60    10.06     0.22 o
  -6  -3   8     1.87     1.96     0.13 o
  -4  -3   8     5.44     4.72     0.12 o
  -3  -3   8   174.54   161.20     0.86 o
  -2  -3   8    99.05    89.68     0.51 o
   2  -3   8    24.35    23.12     0.16 o
   3  -3   8     0.54     0.50     0.06 o
   4  -3   8     4.87     5.16     0.10 o
   5  -3   8    27.24    24.87     0.33 o
   6  -3   8   298.54   305.58     2.56 o
   7  -3   8    34.14    35.46     0.64 o
   8  -3   8     0.97     1.10     0.25 o
   9  -3   8     1.74     2.15     0.35 o
 -10  -2   8     0.85     0.57     0.38 <
  -9  -2   8     0.15     0.07     0.16 <
  -8  -2   8     2.18     2.10     0.16 o
  -7  -2   8     0.14     0.27     0.13 <
  -6  -2   8     0.12    -0.03     0.10 <
  -5  -2   8     0.28     0.14     0.09 <
  -1  -2   8     2.91     2.64     0.07 o
   0  -2   8    14.98    14.70     0.14 o
   1  -2   8     0.95     1.05     0.06 o
   3  -2   8     4.30     3.95     0.08 o
   4  -2   8  1544.27  1473.51     6.40 o
   5  -2   8   384.20   376.52     1.89 o
   6  -2   8    34.69    32.81     0.30 o
   7  -2   8     1.39     1.16     0.19 o
   8  -2   8     4.90     5.76     0.25 o
   9  -2   8     0.22     0.54     0.25 <
 -10  -1   8     4.14     4.70     0.42 o
  -9  -1   8     2.13     1.94     0.16 o
  -8  -1   8     0.14     0.02     0.13 <
  -7  -1   8     1.48     1.45     0.13 o
  -6  -1   8     1.31     1.15     0.10 o
  -3  -1   8    20.87    22.59     0.21 o
  -2  -1   8     5.50     5.13     0.09 o
   0  -1   8     0.19     0.24     0.07 o
   1  -1   8   120.50   116.70     0.80 o
   2  -1   8     0.06     0.10     0.06 <
   3  -1   8  2182.44  2066.39     8.93 o
   4  -1   8     3.26     2.96     0.06 o
   5  -1   8     6.08     5.46     0.10 o
   6  -1   8     0.59     0.56     0.08 o
   7  -1   8     5.59     6.08     0.18 o
   8  -1   8     0.80     1.00     0.17 o
   9  -1   8    15.17    15.23     0.42 o
  10  -1   8     1.53     1.33     0.36 o
 -10   0   8     0.08     0.15     0.48 <
  -9   0   8     0.25     0.63     0.24 <
  -8   0   8     7.36     7.38     0.17 o
  -6   0   8   191.36   171.67     0.97 o
  -5   0   8    73.80    76.55     0.43 o
  -3   0   8     2.93     2.92     0.06 o
  -1   0   8     0.00     0.05     0.06 <
   0   0   8    67.83    77.37     0.60 o
   1   0   8     0.06     0.18     0.06 <
   3   0   8    82.47    76.94     0.36 o
   4   0   8   116.82   111.73     0.55 o
   5   0   8     5.99     5.40     0.09 o
   6   0   8     6.02     5.29     0.12 o
   7   0   8     0.84     0.87     0.11 o
   8   0   8    11.57    10.57     0.24 o
   9   0   8     5.60     5.85     0.27 o
  10   0   8   410.29   414.45     5.28 o
 -10   1   8     5.56     5.80     0.59 o
  -9   1   8     0.01     0.05     0.27 <
  -8   1   8     0.85     0.71     0.19 o
  -7   1   8   227.74   224.50     1.29 o
  -4   1   8    15.22    14.89     0.13 o
  -3   1   8     5.81     5.56     0.09 o
  -2   1   8    18.27    17.18     0.19 o
  -1   1   8    48.49    53.67     0.36 o
   0   1   8   382.08   380.23     2.06 o
   1   1   8  1144.95  1266.46     7.18 o
   2   1   8   199.04   196.24     1.10 o
   4   1   8     0.76     0.70     0.07 o
   6   1   8     5.94     6.04     0.12 o
   7   1   8     2.91     2.80     0.14 o
   8   1   8    69.11    66.11     0.53 o
   9   1   8  1098.93  1103.26     8.63 o
  10   1   8    34.46    36.02     0.79 o
 -10   2   8     0.37    -0.24     0.50 <
  -9   2   8   320.79   329.91     3.38 o
  -8   2   8     2.66     3.19     0.24 o
  -7   2   8    10.63    10.78     0.26 o
  -6   2   8     8.80     8.89     0.15 o
  -5   2   8     1.85     1.78     0.07 o
  -4   2   8     1.74     1.63     0.07 o
  -2   2   8    18.25    20.66     0.18 o
  -1   2   8     0.62     0.63     0.05 o
   0   2   8   789.70   860.43     4.89 o
   1   2   8    31.89    34.01     0.29 o
   3   2   8    11.04    10.42     0.12 o
   4   2   8     1.53     1.11     0.07 o
   5   2   8    18.02    16.29     0.17 o
   6   2   8     3.07     2.46     0.10 o
   7   2   8    95.55    89.28     0.62 o
   8   2   8   129.51   131.11     1.05 o
   9   2   8     0.63     0.77     0.17 o
  10   2   8    18.46    20.08     0.62 o
  -9   3   8    95.23    96.55     1.33 o
  -8   3   8    11.05    10.51     0.32 o
  -7   3   8     1.43     1.47     0.23 o
  -6   3   8     0.15     0.11     0.12 <
  -5   3   8     2.31     2.13     0.08 o
  -4   3   8    65.74    65.76     0.45 o
  -3   3   8     6.98     7.63     0.10 o
  -1   3   8  1290.91  1372.38     5.49 o
   0   3   8    11.70    11.83     0.10 o
   1   3   8     1.68     1.28     0.06 o
   2   3   8    48.20    45.49     0.23 o
   3   3   8    14.22    13.66     0.14 o
   5   3   8     0.24     0.33     0.07 o
   7   3   8     0.50     0.50     0.12 o
   8   3   8     2.64     2.06     0.16 o
   9   3   8     3.37     3.53     0.20 o
  10   3   8     0.19     0.12     0.34 <
  -9   4   8     9.67    10.58     0.46 o
  -8   4   8     2.75     2.41     0.31 o
  -7   4   8     0.75     0.82     0.30 <
  -6   4   8     0.53     0.56     0.14 o
  -5   4   8    23.81    22.57     0.26 o
  -4   4   8    27.71    25.18     0.21 o
  -3   4   8   846.85   861.53     2.92 o
  -1   4   8     2.01     1.93     0.05 o
   0   4   8     8.91     9.01     0.11 o
   1   4   8     0.02     0.11     0.05 <
   2   4   8     0.70     0.94     0.05 o
   7   4   8    12.95    12.95     0.21 o
   8   4   8     0.67     0.67     0.14 o
   9   4   8     3.16     4.01     0.19 o
  10   4   8     0.86     1.31     0.35 o
  -9   5   8     0.27     0.34     0.45 <
  -8   5   8     0.83     1.22     0.43 <
  -7   5   8     0.51     0.87     0.27 o
  -6   5   8     0.40     0.66     0.21 o
  -5   5   8   125.93   130.81     0.87 o
  -4   5   8   680.11   667.47     3.12 o
  -3   5   8   167.71   166.32     0.68 o
  -2   5   8    34.37    32.71     0.17 o
  -1   5   8     1.62     1.68     0.05 o
   0   5   8     0.04     0.18     0.06 o
   2   5   8    78.42    84.35     0.42 o
   4   5   8     1.05     1.08     0.10 o
   5   5   8   183.03   177.17     1.02 o
   6   5   8     4.43     4.23     0.13 o
   7   5   8     0.57     0.46     0.11 o
   8   5   8     4.73     4.86     0.19 o
   9   5   8     1.08     1.30     0.20 o
  10   5   8     0.05    -0.06     0.42 <
  -8   6   8     7.46     7.41     0.84 o
  -7   6   8     1.06     2.10     0.42 o
  -6   6   8   257.63   258.51     3.33 o
  -5   6   8     1.93     2.40     0.18 o
  -4   6   8     2.28     2.39     0.13 o
  -3   6   8    21.17    21.24     0.19 o
  -2   6   8     0.36     0.36     0.05 o
  -1   6   8     0.07     0.22     0.05 o
   1   6   8    20.55    21.30     0.15 o
   2   6   8   261.17   291.01     1.39 o
   3   6   8   796.81   812.67     4.38 o
   6   6   8     0.00     0.00     0.11 <
   7   6   8     1.46     1.68     0.14 o
   8   6   8     0.77     0.97     0.15 o
   9   6   8     0.65     0.87     0.34 <
  -6   7   8     3.83     3.17     0.31 o
  -5   7   8     1.07     1.12     0.30 o
  -4   7   8    10.54    10.67     0.30 o
  -3   7   8     4.65     5.21     0.17 o
  -2   7   8     1.81     1.83     0.11 o
   0   7   8     0.62     0.64     0.06 o
   1   7   8   129.34   135.08     0.65 o
   2   7   8   374.18   394.46     1.88 o
   3   7   8     7.91     9.00     0.15 o
   4   7   8    15.98    15.92     0.20 o
   5   7   8     1.23     1.04     0.11 o
   6   7   8     0.23     0.37     0.13 <
   7   7   8     0.90     1.11     0.14 o
   8   7   8     5.41     5.06     0.20 o
   9   7   8     3.08     3.29     0.30 o
  -6   8   8     5.96     6.72     0.45 o
  -5   8   8     2.98     3.21     0.36 o
  -4   8   8     0.04     0.01     0.28 <
  -3   8   8     2.41     2.06     0.24 o
  -2   8   8     0.94     0.98     0.13 o
  -1   8   8    28.61    30.98     0.35 o
   0   8   8   676.14   719.60     4.16 o
   1   8   8    37.33    39.73     0.32 o
   2   8   8     0.33     0.45     0.08 o
   3   8   8    13.48    13.57     0.18 o
   4   8   8     0.20     0.42     0.10 o
   5   8   8     1.37     1.06     0.12 o
   6   8   8     7.02     7.79     0.19 o
   7   8   8     3.05     2.98     0.17 o
   8   8   8   110.95   115.14     1.39 o
   9   8   8   174.92   171.83     1.91 o
  -5   9   8     1.78     1.44     0.35 o
  -4   9   8     3.83     4.23     0.36 o
  -3   9   8     1.14     1.28     0.25 o
  -2   9   8     0.59     0.10     0.25 <
  -1   9   8   212.73   219.08     2.10 o
   0   9   8     1.70     1.80     0.15 o
   1   9   8     9.56     9.87     0.14 o
   2   9   8     6.35     6.34     0.13 o
   3   9   8     3.39     3.85     0.13 o
   4   9   8     7.90     7.65     0.17 o
   5   9   8     7.56     7.60     0.18 o
   6   9   8     2.18     1.92     0.13 o
   7   9   8     2.75     3.20     0.19 o
   8   9   8    80.35    77.53     1.08 o
  -5  10   8     1.73     1.72     0.43 o
  -4  10   8     0.63     0.70     0.28 <
  -3  10   8   165.55   167.55     2.32 o
  -2  10   8   139.87   140.54     2.00 o
  -1  10   8     4.72     4.96     0.28 o
   0  10   8     3.79     4.13     0.20 o
   1  10   8     0.35     0.34     0.22 <
   2  10   8     0.03     0.04     0.14 <
   3  10   8     1.62     1.59     0.14 o
   4  10   8     0.17     0.13     0.11 <
   5  10   8    47.69    49.16     0.46 o
   6  10   8   147.24   147.92     1.02 o
   7  10   8     7.96     8.11     0.31 o
  -2  11   8     0.24    -0.08     0.33 <
  -1  11   8     1.93     2.35     0.36 o
   0  11   8     0.45     0.47     0.31 <
   1  11   8     3.73     3.84     0.28 o
   2  11   8    10.90    11.32     0.32 o
   3  11   8     1.22     1.45     0.18 o
   4  11   8    60.57    59.59     0.50 o
   5  11   8    67.38    68.17     0.58 o
   6  11   8     2.56     2.90     0.24 o
  -2  12   8     4.56     4.47     0.64 o
  -1  12   8     0.02     0.25     0.48 <
   0  12   8     2.85     2.12     0.36 o
   1  12   8     6.62     6.75     0.45 o
   2  12   8     3.01     2.98     0.29 o
   3  12   8     5.93     6.28     0.33 o
   4  12   8   124.79   122.03     1.12 o
   5  12   8     0.08    -0.07     0.19 <
   0  13   8     1.61     1.24     0.39 o
   1  13   8   142.01   144.45     2.13 o
   2  13   8     3.47     3.81     0.42 o
   3  13   8    27.91    27.74     0.60 o
  -1 -11   9     4.15     4.03     0.31 o
  -4 -10   9     0.09     0.01     0.21 <
  -3 -10   9     0.43     0.27     0.21 <
  -2 -10   9     0.19    -0.09     0.20 <
  -1 -10   9   219.58   221.53     2.31 o
   0 -10   9   102.57   103.00     1.26 o
   1 -10   9     5.84     6.86     0.43 o
   2 -10   9     7.44     7.82     0.45 o
   3 -10   9     1.41     1.67     0.53 o
  -6  -9   9     2.19     1.91     0.26 o
  -5  -9   9     2.67     3.01     0.34 o
  -4  -9   9     4.12     4.10     0.18 o
  -3  -9   9     0.09     0.03     0.14 <
  -2  -9   9    61.24    59.86     0.72 o
  -1  -9   9    43.62    45.17     0.59 o
   0  -9   9     3.81     3.82     0.26 o
   1  -9   9     0.05    -0.05     0.23 <
   2  -9   9     0.01     0.10     0.24 <
   3  -9   9     1.55     2.09     0.37 o
   4  -9   9     5.89     5.80     0.45 o
  -7  -8   9     0.64     0.66     0.41 <
  -6  -8   9     2.36     3.10     0.48 o
  -5  -8   9    14.73    15.44     0.33 o
  -4  -8   9     0.31     0.41     0.16 <
  -3  -8   9     6.38     6.00     0.18 o
  -2  -8   9   179.46   181.10     1.31 o
  -1  -8   9    12.82    12.47     0.20 o
   0  -8   9    10.13     9.84     0.32 o
   1  -8   9     3.15     2.72     0.23 o
   2  -8   9     1.45     1.73     0.32 o
   3  -8   9     0.24     0.11     0.29 <
   4  -8   9     0.25     0.58     0.32 <
   5  -8   9   289.35   296.61     3.70 o
   6  -8   9    47.80    49.89     1.55 o
  -8  -7   9     2.94     2.77     0.36 o
  -7  -7   9     1.80     1.61     0.35 o
  -6  -7   9    38.81    40.40     0.62 o
  -5  -7   9     7.15     6.92     0.24 o
  -4  -7   9     5.54     5.24     0.19 o
  -3  -7   9    73.77    73.30     0.53 o
  -2  -7   9     0.07     0.12     0.10 <
  -1  -7   9     1.44     1.41     0.10 o
   0  -7   9     1.03     0.81     0.10 o
   1  -7   9     0.12     0.10     0.13 <
   2  -7   9     0.07     0.46     0.22 <
   3  -7   9    47.47    44.31     0.87 o
   4  -7   9    54.91    52.19     0.99 o
   5  -7   9    81.79    80.48     1.33 o
   6  -7   9     7.34     6.94     0.68 o
   7  -7   9     0.61     1.21     0.54 <
  -8  -6   9     2.56     2.39     0.39 o
  -7  -6   9     4.54     5.73     0.27 o
  -6  -6   9    32.49    31.23     0.41 o
  -5  -6   9   382.27   380.62     2.20 o
  -4  -6   9     0.07     0.03     0.10 <
  -3  -6   9    11.11    10.66     0.17 o
  -2  -6   9     6.41     6.91     0.14 o
  -1  -6   9    36.82    34.47     0.28 o
   0  -6   9     0.00    -0.04     0.08 <
   1  -6   9     6.06     5.51     0.11 o
   2  -6   9    70.08    71.73     0.75 o
   3  -6   9     0.30     0.28     0.23 <
   4  -6   9    14.98    14.96     0.72 o
   5  -6   9     4.26     4.26     0.30 o
   6  -6   9     0.38     0.39     0.26 <
   7  -6   9     1.64     2.44     0.43 o
  -9  -5   9     0.67     0.15     0.32 <
  -8  -5   9     3.63     3.74     0.31 o
  -7  -5   9   484.93   485.70     3.54 o
  -6  -5   9   534.27   548.09     3.31 o
  -5  -5   9     1.84     1.64     0.12 o
  -4  -5   9    17.47    15.89     0.21 o
  -3  -5   9     3.22     3.50     0.11 o
  -2  -5   9     0.53     0.52     0.07 o
  -1  -5   9     1.20     1.15     0.08 o
   0  -5   9     9.38     9.77     0.15 o
   2  -5   9   138.81   125.41     0.66 o
   3  -5   9     0.11     0.18     0.14 <
   4  -5   9     9.75    10.23     0.23 o
   5  -5   9     0.38     0.49     0.18 <
   6  -5   9     0.60     1.10     0.26 o
   7  -5   9     0.06     0.08     0.26 <
   8  -5   9     0.18    -0.54     0.39 <
  -9  -4   9     6.21     5.46     0.53 o
  -8  -4   9   527.95   532.82     3.26 o
  -7  -4   9    19.65    18.82     0.30 o
  -6  -4   9    11.68    11.31     0.21 o
  -5  -4   9     0.46     0.81     0.11 o
  -4  -4   9     4.67     4.55     0.13 o
  -3  -4   9     7.94     7.59     0.13 o
  -2  -4   9   108.40    99.64     0.52 o
   2  -4   9     9.56     9.42     0.10 o
   4  -4   9     4.34     4.18     0.16 o
   5  -4   9    18.67    18.28     0.30 o
   6  -4   9     0.61     0.94     0.21 o
   7  -4   9     6.05     5.81     0.33 o
   8  -4   9   113.94   111.04     1.79 o
  -9  -3   9    36.77    37.85     0.82 o
  -8  -3   9     0.00    -0.18     0.15 <
  -7  -3   9    50.59    50.06     0.50 o
  -6  -3   9     0.54     0.40     0.12 o
  -4  -3   9     0.63     0.64     0.08 o
  -3  -3   9    53.76    51.07     0.37 o
  -2  -3   9     7.26     6.98     0.10 o
  -1  -3   9  2260.68  2040.07     9.64 o
   2  -3   9    17.11    16.93     0.13 o
   3  -3   9     2.80     2.95     0.08 o
   4  -3   9     0.22     0.27     0.07 o
   5  -3   9     1.42     1.08     0.13 o
   6  -3   9     2.34     2.18     0.25 o
   7  -3   9   243.51   252.04     2.00 o
   8  -3   9    27.51    29.92     0.56 o
   9  -3   9     3.10     3.81     0.45 o
  -9  -2   9     1.21     0.91     0.25 o
  -8  -2   9     7.68     6.94     0.24 o
  -7  -2   9     0.03     0.10     0.13 <
  -6  -2   9     1.08     0.90     0.10 o
  -5  -2   9     0.00    -0.02     0.09 <
  -3  -2   9     0.03    -0.03     0.07 <
  -1  -2   9     2.68     2.45     0.08 o
   0  -2   9     0.09     0.20     0.06 o
   1  -2   9     0.43     0.40     0.05 o
   2  -2   9     0.09     0.00     0.05 <
   3  -2   9     0.30     0.29     0.06 o
   4  -2   9   117.50   112.68     0.56 o
   5  -2   9    82.40    80.11     0.47 o
   6  -2   9   410.58   415.93     2.75 o
   7  -2   9     6.09     5.04     0.26 o
   8  -2   9     5.11     5.47     0.30 o
   9  -2   9     0.14     0.40     0.31 <
 -10  -1   9     3.59     3.56     0.36 o
  -9  -1   9     3.67     3.94     0.20 o
  -8  -1   9     3.07     2.90     0.15 o
  -7  -1   9     1.84     2.05     0.14 o
  -6  -1   9     3.14     2.75     0.12 o
  -5  -1   9     2.31     2.34     0.10 o
  -3  -1   9   136.52   129.37     0.69 o
  -2  -1   9     3.91     3.56     0.09 o
   0  -1   9     1.03     0.89     0.06 o
   1  -1   9    52.78    52.20     0.28 o
   2  -1   9     0.90     0.86     0.05 o
   3  -1   9    53.47    50.17     0.29 o
   4  -1   9     3.99     3.50     0.07 o
   5  -1   9   358.72   339.00     1.45 o
   6  -1   9     1.22     1.29     0.09 o
   7  -1   9    24.35    26.14     0.32 o
   8  -1   9     0.14     0.47     0.18 <
   9  -1   9    10.79    11.25     0.33 o
 -10   0   9     0.00     0.85     0.48 <
  -9   0   9     0.67     0.63     0.24 <
  -8   0   9     2.21     2.31     0.13 o
  -7   0   9     1.30     1.58     0.13 o
  -6   0   9     0.53     0.42     0.10 o
  -5   0   9    42.75    46.20     0.31 o
  -1   0   9     5.56     5.29     0.08 o
   0   0   9    28.76    31.47     0.23 o
   2   0   9     0.59     0.11     0.05 <
   3   0   9   321.57   289.83     1.26 o
   4   0   9  2371.40  2283.50     8.81 o
   5   0   9     1.89     1.83     0.08 o
   6   0   9    18.51    17.70     0.19 o
   7   0   9     0.15     0.34     0.10 o
   8   0   9     7.39     7.59     0.24 o
   9   0   9     1.32     1.22     0.25 o
  10   0   9     0.06     0.41     0.34 <
 -10   1   9     6.25     5.96     0.58 o
  -9   1   9     0.16    -0.05     0.27 <
  -8   1   9     0.13     0.19     0.19 <
  -7   1   9    34.85    35.25     0.31 o
  -3   1   9     6.19     6.52     0.10 o
  -2   1   9    32.67    30.04     0.21 o
  -1   1   9    23.85    23.74     0.22 o
   0   1   9    60.10    58.78     0.44 o
   1   1   9    32.33    30.49     0.25 o
   2   1   9  1925.20  1882.02     8.48 o
   4   1   9     0.00    -0.05     0.05 <
   5   1   9     1.78     2.24     0.09 o
   6   1   9     8.23     8.65     0.14 o
   7   1   9     0.02     0.15     0.10 <
   8   1   9    12.61    12.43     0.22 o
   9   1   9    31.23    31.91     0.58 o
  10   1   9    56.10    59.44     1.02 o
  -9   2   9     6.02     6.49     0.39 o
  -8   2   9     0.27     0.51     0.22 <
  -6   2   9    23.02    23.83     0.22 o
  -5   2   9     3.36     3.15     0.09 o
  -4   2   9     0.75     0.83     0.07 o
  -1   2   9     0.86     0.78     0.06 o
   0   2   9   122.96   133.13     0.98 o
   1   2   9   130.57   128.51     0.76 o
   3   2   9    76.88    75.42     0.40 o
   4   2   9     6.23     5.65     0.11 o
   5   2   9    26.91    25.18     0.22 o
   6   2   9     0.13     0.11     0.09 <
   7   2   9    15.26    14.51     0.23 o
   8   2   9    46.54    46.36     0.47 o
   9   2   9    44.92    48.56     0.47 o
  10   2   9   102.36   104.10     1.45 o
  -9   3   9   129.87   132.47     2.14 o
  -8   3   9    77.68    74.31     0.82 o
  -7   3   9     2.52     2.59     0.24 o
  -6   3   9     0.00    -0.15     0.12 <
  -5   3   9     3.89     3.78     0.10 o
  -4   3   9    32.98    33.50     0.23 o
  -3   3   9     6.42     6.90     0.11 o
  -2   3   9     1.73     1.79     0.07 o
  -1   3   9  1064.01  1142.40     5.73 o
   0   3   9    49.39    52.48     0.33 o
   1   3   9     8.22     7.54     0.08 o
   2   3   9    89.08    84.39     0.43 o
   3   3   9    14.91    13.12     0.13 o
   5   3   9     0.10    -0.03     0.09 <
   6   3   9     2.04     2.34     0.11 o
   7   3   9    30.55    27.98     0.35 o
   8   3   9   868.26   861.41     5.48 o
   9   3   9     6.44     6.21     0.23 o
  10   3   9     9.63     9.33     0.47 o
  -9   4   9   101.32    99.08     1.77 o
  -8   4   9     0.07     0.42     0.28 <
  -7   4   9     0.76     0.81     0.22 o
  -6   4   9     8.36     8.51     0.23 o
  -5   4   9     9.28     8.52     0.18 o
  -4   4   9    11.73    10.91     0.16 o
  -3   4   9     0.73     0.88     0.08 o
  -1   4   9     0.21     0.41     0.06 o
   0   4   9     0.54     0.74     0.07 o
   2   4   9     2.44     2.15     0.05 o
   3   4   9     0.90     0.70     0.06 o
   4   4   9    14.86    13.55     0.16 o
   5   4   9     8.68     7.82     0.15 o
   6   4   9     0.78     0.35     0.10 o
   7   4   9   316.45   309.90     2.31 o
   8   4   9     1.71     2.10     0.17 o
   9   4   9     5.31     5.50     0.30 o
  10   4   9     0.18     0.10     0.35 <
  -9   5   9     1.17     1.43     0.47 o
  -8   5   9     0.30    -0.06     0.42 <
  -7   5   9     0.01     0.33     0.26 <
  -6   5   9     0.51     0.51     0.21 <
  -5   5   9    11.51    11.71     0.22 o
  -4   5   9    27.19    26.83     0.23 o
  -3   5   9   686.93   663.43     2.83 o
  -2   5   9   163.71   164.68     0.70 o
   0   5   9     0.14     0.10     0.05 <
   1   5   9     0.08     0.06     0.05 <
   2   5   9    49.61    49.66     0.29 o
   3   5   9     0.05     0.03     0.07 <
   5   5   9   570.24   541.60     2.83 o
   6   5   9    41.25    40.04     0.39 o
   7   5   9     0.67     0.51     0.12 o
   8   5   9     4.67     4.35     0.19 o
   9   5   9     0.03    -0.02     0.28 <
  10   5   9     0.17     0.42     0.44 <
  -8   6   9     3.22     2.85     0.70 o
  -7   6   9     2.30     2.03     0.43 o
  -6   6   9    10.48    10.90     0.35 o
  -5   6   9     0.35     0.22     0.17 <
  -3   6   9    73.17    73.40     0.48 o
  -2   6   9     8.79     9.00     0.11 o
  -1   6   9     1.87     2.11     0.08 o
   1   6   9    12.85    12.78     0.13 o
   2   6   9    12.54    14.11     0.15 o
   3   6   9    69.44    68.37     0.46 o
   6   6   9     0.39     0.46     0.11 o
   7   6   9     3.77     4.32     0.19 o
   8   6   9     0.66     0.71     0.14 o
   9   6   9     0.25     0.87     0.30 <
  -7   7   9     0.39     0.68     0.62 <
  -6   7   9     6.40     6.37     0.49 o
  -5   7   9   340.98   339.36     3.35 o
  -4   7   9    13.81    13.58     0.27 o
  -3   7   9    21.25    21.80     0.28 o
  -2   7   9     8.52     8.69     0.17 o
  -1   7   9     4.73     5.30     0.12 o
   0   7   9     0.32     0.35     0.07 o
   1   7   9     3.28     3.06     0.08 o
   2   7   9   138.32   144.94     0.80 o
   3   7   9   382.97   427.40     2.25 o
   4   7   9    21.63    21.98     0.23 o
   5   7   9    13.14    13.06     0.20 o
   6   7   9     1.46     1.64     0.16 o
   7   7   9     0.96     0.81     0.14 o
   8   7   9     3.11     3.06     0.21 o
   9   7   9     0.16     0.06     0.34 <
  -6   8   9    75.64    78.08     1.77 o
  -5   8   9     1.26     0.79     0.26 o
  -4   8   9     0.59     0.37     0.23 <
  -3   8   9     1.28     1.36     0.28 o
  -2   8   9     0.14     0.22     0.11 <
  -1   8   9    16.15    16.72     0.26 o
   0   8   9     0.00     0.13     0.08 <
   1   8   9    18.00    19.75     0.20 o
   2   8   9    55.56    62.59     0.45 o
   3   8   9     2.40     2.68     0.11 o
   4   8   9     4.07     4.76     0.14 o
   5   8   9     0.73     0.59     0.12 o
   6   8   9     4.71     4.89     0.17 o
   7   8   9     1.86     2.06     0.16 o
   8   8   9     0.00    -0.11     0.26 <
  -5   9   9     0.74     0.31     0.32 <
  -4   9   9     7.17     6.79     0.35 o
  -3   9   9     0.09    -0.23     0.21 <
  -2   9   9     1.92     2.10     0.24 o
  -1   9   9     8.61     8.92     0.21 o
   0   9   9     0.22     0.41     0.13 o
   1   9   9    93.93    95.76     0.62 o
   2   9   9     3.56     3.65     0.13 o
   3   9   9     8.85     9.10     0.19 o
   4   9   9    17.40    16.69     0.22 o
   5   9   9     1.97     2.05     0.13 o
   6   9   9     0.57     0.56     0.12 o
   7   9   9     0.51     0.47     0.21 <
   8   9   9   188.87   185.74     2.03 o
  -5  10   9     0.67     0.62     0.42 <
  -4  10   9     0.53     0.64     0.42 <
  -3  10   9     5.49     5.18     0.34 o
  -2  10   9    44.52    43.92     0.75 o
  -1  10   9    87.37    86.39     0.94 o
   0  10   9     9.89     9.94     0.28 o
   1  10   9     4.52     4.61     0.25 o
   2  10   9     0.32     0.33     0.13 <
   3  10   9     3.29     3.02     0.13 o
   4  10   9     0.09     0.12     0.11 <
   5  10   9     2.91     3.36     0.16 o
   6  10   9     3.65     3.79     0.18 o
   7  10   9     6.19     7.32     0.30 o
  -2  11   9     1.04     0.89     0.33 <
  -1  11   9     1.84     2.23     0.29 o
   0  11   9     0.52     0.62     0.24 <
   1  11   9     0.61     0.57     0.19 <
   2  11   9     4.64     4.92     0.25 o
   3  11   9     1.47     1.50     0.21 o
   4  11   9     0.06     0.07     0.13 <
   5  11   9    12.43    13.57     0.26 o
   6  11   9    18.82    17.67     0.37 o
  -2  12   9     1.50     0.91     0.56 <
  -1  12   9     0.82     1.44     0.56 <
   0  12   9     0.38     0.28     0.35 <
   1  12   9     0.06     0.13     0.24 <
   2  12   9     0.00    -0.06     0.24 <
   3  12   9     1.68     1.48     0.23 o
   4  12   9   137.77   137.40     1.39 o
   5  12   9     4.70     4.93     0.28 o
   0  13   9     0.44     0.08     0.39 <
   1  13   9    11.29    11.20     0.56 o
   2  13   9     0.27     0.22     0.26 <
  -4 -10  10     0.08     0.08     0.21 <
  -3 -10  10     0.00     0.01     0.21 <
  -2 -10  10     0.25     0.07     0.20 <
  -1 -10  10    21.32    22.41     0.52 o
   0 -10  10    16.51    16.91     0.45 o
   1 -10  10     4.23     4.01     0.59 o
   2 -10  10    88.77    89.58     2.14 o
  -5  -9  10     0.21     0.22     0.31 <
  -4  -9  10     1.01     1.02     0.25 o
  -3  -9  10     3.88     3.89     0.19 o
  -2  -9  10     3.13     3.13     0.26 o
  -1  -9  10    52.49    52.02     0.65 o
   0  -9  10   313.37   313.51     3.06 o
   1  -9  10     0.02    -0.07     0.24 <
   2  -9  10     0.19     0.23     0.32 <
   3  -9  10     0.42     0.23     0.34 <
   4  -9  10     2.89     2.55     0.39 o
  -6  -8  10     0.48     0.90     0.41 <
  -5  -8  10     6.38     6.77     0.57 o
  -4  -8  10     1.07     1.33     0.17 o
  -3  -8  10     0.23     0.18     0.13 <
  -2  -8  10   129.16   133.03     0.89 o
  -1  -8  10    70.82    72.18     0.59 o
   0  -8  10    14.82    14.23     0.37 o
   1  -8  10     5.86     5.42     0.28 o
   2  -8  10     0.03    -0.25     0.30 <
   3  -8  10     0.39     0.70     0.31 <
   4  -8  10     1.13     1.34     0.35 o
   5  -8  10     2.80     3.21     0.39 o
  -7  -7  10     1.15     0.89     0.35 <
  -6  -7  10     7.38     7.67     0.44 o
  -5  -7  10     0.80     0.77     0.18 o
  -4  -7  10     0.00     0.03     0.14 <
  -3  -7  10   352.04   361.96     2.43 o
  -2  -7  10     8.79     9.41     0.18 o
  -1  -7  10     2.60     2.69     0.12 o
   0  -7  10     2.15     1.89     0.11 o
   1  -7  10     0.67     0.86     0.18 o
   2  -7  10     0.01    -0.05     0.25 <
   3  -7  10    14.96    14.79     0.51 o
   4  -7  10     0.00    -0.15     0.31 <
   5  -7  10   144.72   150.16     2.10 o
   6  -7  10   224.95   231.02     4.37 o
  -8  -6  10     1.88     2.30     0.40 o
  -7  -6  10     0.43     0.23     0.25 <
  -6  -6  10     4.14     4.39     0.20 o
  -5  -6  10    47.46    48.24     0.42 o
  -4  -6  10    65.83    70.12     0.52 o
  -3  -6  10    59.97    59.09     0.48 o
  -2  -6  10    16.14    16.70     0.22 o
  -1  -6  10    31.70    29.27     0.27 o
   0  -6  10     0.41     0.48     0.09 o
   1  -6  10     5.28     5.25     0.12 o
   2  -6  10    14.80    15.08     0.27 o
   3  -6  10     0.02    -0.08     0.34 <
   4  -6  10    78.31    72.01     1.73 o
   5  -6  10    21.51    22.54     0.53 o
   6  -6  10     0.23    -0.14     0.37 <
   7  -6  10     2.48     2.78     0.42 o
  -8  -5  10     5.85     6.01     0.45 o
  -7  -5  10    18.17    19.70     0.38 o
  -6  -5  10   214.53   220.19     1.39 o
  -5  -5  10    35.96    38.79     0.35 o
  -4  -5  10    49.84    49.43     0.41 o
  -3  -5  10     2.93     3.19     0.11 o
  -2  -5  10     1.27     1.19     0.09 o
  -1  -5  10     2.49     2.46     0.10 o
   0  -5  10     0.06     0.05     0.08 <
   3  -5  10   363.28   365.50     2.65 o
   4  -5  10    52.85    54.31     0.64 o
   5  -5  10     0.04     0.15     0.19 <
   6  -5  10     0.83     1.11     0.27 o
   7  -5  10     0.11    -0.15     0.37 <
   8  -5  10     0.11     0.29     0.43 <
  -9  -4  10     3.30     3.27     0.50 o
  -8  -4  10     0.02    -0.35     0.23 <
  -7  -4  10     5.95     6.16     0.23 o
  -6  -4  10   157.65   157.21     1.05 o
  -5  -4  10     0.39     0.31     0.11 <
  -4  -4  10    10.86    10.96     0.18 o
  -3  -4  10     0.14     0.20     0.08 <
  -2  -4  10    61.37    59.18     0.36 o
  -1  -4  10    23.82    21.41     0.17 o
   0  -4  10     0.41     0.62     0.07 o
   4  -4  10     3.09     3.24     0.18 o
   5  -4  10     5.42     5.57     0.21 o
   6  -4  10     0.71     0.60     0.21 <
   7  -4  10     6.35     5.94     0.34 o
   8  -4  10     2.13     2.38     0.42 o
  -9  -3  10     1.93     2.15     0.33 o
  -8  -3  10     0.95     1.08     0.15 o
  -7  -3  10   650.83   656.66     3.69 o
  -6  -3  10     0.05     0.25     0.12 <
  -5  -3  10    22.84    21.49     0.25 o
  -4  -3  10     0.08     0.01     0.08 <
  -3  -3  10    27.78    27.44     0.24 o
  -2  -3  10     0.36     0.40     0.06 o
   2  -3  10     5.17     5.46     0.08 o
   3  -3  10    13.05    13.25     0.15 o
   4  -3  10     1.12     1.35     0.09 o
   5  -3  10     0.43     0.25     0.13 <
   6  -3  10     0.03    -0.31     0.25 <
   7  -3  10     0.03    -0.13     0.24 <
   8  -3  10    27.13    28.69     0.62 o
   9  -3  10    33.40    32.68     0.89 o
  -9  -2  10    81.81    81.32     1.08 o
  -8  -2  10    76.86    72.82     0.71 o
  -7  -2  10     0.00     0.13     0.12 <
  -6  -2  10     5.48     5.01     0.13 o
  -5  -2  10     0.17     0.17     0.09 <
  -4  -2  10     2.24     2.31     0.10 o
  -3  -2  10     1.07     1.00     0.08 o
  -1  -2  10     1.34     1.26     0.08 o
   1  -2  10     0.07     0.06     0.05 <
   3  -2  10     0.00    -0.01     0.06 <
   4  -2  10    27.41    25.74     0.19 o
   5  -2  10    10.54    10.25     0.13 o
   6  -2  10    35.72    34.94     0.50 o
   7  -2  10    24.88    23.45     0.45 o
   8  -2  10    10.20    11.26     0.36 o
   9  -2  10     0.00    -0.02     0.32 <
  -9  -1  10     4.80     5.39     0.30 o
  -8  -1  10    13.79    13.96     0.25 o
  -7  -1  10     7.35     7.30     0.17 o
  -6  -1  10     3.69     3.35     0.13 o
  -5  -1  10     2.32     1.88     0.10 o
  -4  -1  10     8.92     7.99     0.13 o
  -3  -1  10   136.46   125.85     0.71 o
  -2  -1  10    82.61    76.18     0.49 o
   2  -1  10     2.73     2.62     0.07 o
   3  -1  10     2.29     1.97     0.06 o
   4  -1  10     0.15     0.24     0.07 o
   6  -1  10     0.05     0.08     0.08 <
   7  -1  10   118.70   125.33     0.99 o
   8  -1  10     0.04    -0.03     0.18 <
   9  -1  10     7.26     7.84     0.33 o
  -9   0  10     3.66     3.39     0.33 o
  -8   0  10     1.71     1.94     0.14 o
  -7   0  10     0.04     0.14     0.12 <
  -6   0  10     1.12     1.00     0.10 o
  -5   0  10     1.60     1.32     0.09 o
  -1   0  10    42.00    37.67     0.29 o
   0   0  10    12.02    13.57     0.12 o
   1   0  10     4.67     5.04     0.07 o
   2   0  10     0.24     0.10     0.05 <
   3   0  10     2.31     2.23     0.07 o
   4   0  10  1239.70  1184.45     4.76 o
   5   0  10   366.41   359.05     1.73 o
   6   0  10    39.72    37.96     0.30 o
   7   0  10     1.14     0.98     0.11 o
   8   0  10     4.38     4.66     0.22 o
   9   0  10     0.04     0.25     0.30 <
  -9   1  10     0.57     0.31     0.35 <
  -8   1  10     0.33     0.30     0.21 <
  -7   1  10    11.62    11.66     0.19 o
  -2   1  10    29.62    27.18     0.20 o
  -1   1  10    18.22    16.64     0.13 o
   0   1  10     4.75     4.90     0.07 o
   1   1  10     9.31     9.14     0.11 o
   2   1  10     0.86     0.90     0.05 o
   3   1  10  1167.52  1072.12     4.66 o
   4   1  10    55.11    61.00     0.36 o
   5   1  10     0.16     0.09     0.08 <
   6   1  10    10.82    10.90     0.16 o
   7   1  10     1.43     1.76     0.11 o
   8   1  10     4.32     4.49     0.17 o
   9   1  10     8.02     8.08     0.38 o
  10   1  10     0.04     0.46     0.35 <
  -9   2  10     0.98     0.77     0.36 <
  -8   2  10     0.40     0.45     0.22 <
  -7   2  10     1.12     1.63     0.17 o
  -6   2  10   461.23   467.94     2.25 o
  -5   2  10    46.58    44.14     0.28 o
  -4   2  10     0.09     0.27     0.08 o
  -2   2  10     0.02     0.00     0.05 <
  -1   2  10     0.72     0.79     0.05 o
   3   2  10   656.11   644.22     3.11 o
   4   2  10    30.49    29.32     0.23 o
   5   2  10    33.64    32.53     0.30 o
   6   2  10     0.01    -0.04     0.09 <
   7   2  10     6.70     6.78     0.15 o
   8   2  10     7.31     7.09     0.21 o
   9   2  10     5.13     5.38     0.19 o
  10   2  10   156.48   152.74     2.40 o
  -9   3  10     1.30     1.51     0.47 o
  -8   3  10    51.03    50.34     0.65 o
  -7   3  10   245.24   241.14     1.91 o
  -6   3  10     1.28     0.96     0.15 o
  -5   3  10     3.25     3.15     0.10 o
  -4   3  10    24.83    25.00     0.21 o
  -3   3  10     4.12     4.27     0.07 o
  -2   3  10     4.00     3.54     0.06 o
  -1   3  10    76.27    80.44     0.39 o
   0   3  10    33.92    32.34     0.22 o
   2   3  10   289.98   285.49     1.25 o
   4   3  10     0.01     0.05     0.08 <
   5   3  10     0.00    -0.13     0.10 <
   6   3  10     7.38     8.17     0.16 o
   7   3  10     2.88     2.92     0.14 o
   8   3  10   151.02   150.14     1.42 o
   9   3  10   165.63   171.00     1.34 o
  10   3  10   115.54   112.56     1.93 o
  -9   4  10   179.91   183.87     2.71 o
  -8   4  10    94.65    97.47     1.12 o
  -7   4  10     0.64     0.51     0.22 <
  -6   4  10    26.64    25.87     0.49 o
  -5   4  10     6.14     6.36     0.16 o
  -4   4  10    10.86     9.57     0.13 o
  -3   4  10     0.60     0.58     0.06 o
  -2   4  10     3.76     3.88     0.07 o
  -1   4  10     4.70     5.20     0.07 o
   0   4  10   384.58   427.21     1.99 o
   1   4  10     7.03     7.31     0.09 o
   2   4  10    11.03    10.28     0.09 o
   3   4  10     8.28     8.18     0.11 o
   4   4  10    15.38    14.64     0.22 o
   5   4  10    14.13    12.99     0.19 o
   6   4  10     0.04     0.09     0.10 <
   7   4  10   203.61   196.39     1.42 o
   8   4  10    78.48    83.35     0.75 o
   9   4  10     8.18     8.43     0.33 o
  10   4  10     0.92     0.59     0.35 <
  -9   5  10    60.17    61.71     1.34 o
  -8   5  10     4.07     3.96     0.35 o
  -7   5  10     0.76     0.74     0.21 o
  -6   5  10     0.16     0.23     0.20 <
  -5   5  10     1.18     1.16     0.14 o
  -4   5  10     6.02     6.01     0.14 o
  -3   5  10     4.38     4.61     0.12 o
  -2   5  10   478.10   488.11     2.02 o
  -1   5  10   509.85   554.86     2.07 o
   0   5  10     1.86     1.98     0.06 o
   1   5  10     2.66     2.63     0.07 o
   2   5  10    37.63    37.05     0.22 o
   3   5  10     0.81     0.46     0.08 o
   5   5  10     0.23     0.28     0.10 <
   6   5  10    99.44    94.42     0.72 o
   7   5  10   218.51   214.37     1.53 o
   8   5  10     1.43     0.97     0.16 o
   9   5  10     3.51     4.03     0.34 o
  -8   6  10     1.87     1.24     0.69 <
  -7   6  10     5.42     5.74     0.51 o
  -6   6  10     0.77     0.77     0.23 o
  -5   6  10     0.01    -0.29     0.22 <
  -4   6  10     3.88     3.13     0.13 o
  -3   6  10   942.43   949.71     4.85 o
  -2   6  10    30.39    30.92     0.28 o
  -1   6  10     5.24     5.56     0.09 o
   0   6  10    20.20    21.84     0.17 o
   1   6  10    14.00    13.70     0.13 o
   2   6  10     1.97     2.04     0.08 o
   3   6  10    13.51    13.14     0.18 o
   4   6  10    29.35    26.94     0.27 o
   6   6  10     0.68     0.47     0.12 o
   7   6  10    14.17    14.52     0.29 o
   8   6  10     0.01     0.24     0.16 <
   9   6  10     0.20     0.30     0.29 <
  -8   7  10     0.11    -0.57     0.69 <
  -7   7  10     0.04     0.28     0.58 <
  -6   7  10     0.18    -0.01     0.29 <
  -5   7  10    87.67    90.19     1.19 o
  -4   7  10     0.33     0.31     0.21 <
  -3   7  10    55.00    54.34     0.53 o
  -2   7  10    66.53    67.58     0.55 o
  -1   7  10     2.57     2.64     0.09 o
   0   7  10     1.15     1.27     0.08 o
   1   7  10     1.36     1.26     0.07 o
   2   7  10    22.99    23.36     0.20 o
   4   7  10   358.42   342.77     1.86 o
   5   7  10    56.80    56.59     0.46 o
   6   7  10    20.99    20.17     0.34 o
   7   7  10     0.04     0.00     0.14 <
   8   7  10     0.27    -0.18     0.32 <
   9   7  10     0.35     0.44     0.34 <
  -5   8  10    60.29    63.67     0.97 o
  -4   8  10     1.41     1.53     0.27 o
  -3   8  10     7.68     8.11     0.39 o
  -2   8  10     0.01    -0.10     0.13 <
  -1   8  10     6.25     6.50     0.16 o
   0   8  10     0.05     0.12     0.07 <
   1   8  10     1.66     1.77     0.09 o
   3   8  10  1197.21  1183.95     6.01 o
   4   8  10     7.64     8.47     0.18 o
   5   8  10     0.49     0.46     0.12 o
   6   8  10     5.64     5.91     0.18 o
   7   8  10     0.23     0.17     0.14 <
   8   8  10     0.28    -0.09     0.33 <
  -5   9  10     1.97     2.11     0.44 o
  -4   9  10    13.51    13.41     0.45 o
  -3   9  10     0.16     0.15     0.21 <
  -2   9  10     0.28     0.22     0.21 <
  -1   9  10     1.18     1.35     0.16 o
   0   9  10     0.00     0.12     0.12 <
   1   9  10   111.23   115.65     0.76 o
   2   9  10    17.36    18.20     0.24 o
   3   9  10     4.52     5.16     0.18 o
   4   9  10    47.33    45.98     0.42 o
   5   9  10     2.09     2.03     0.14 o
   6   9  10     0.56     0.71     0.14 o
   7   9  10     0.01     0.10     0.24 <
   8   9  10     0.93     1.50     0.37 o
  -4  10  10     0.00    -0.16     0.38 <
  -3  10  10     1.34     1.02     0.27 o
  -2  10  10     5.38     5.31     0.32 o
  -1  10  10    16.61    17.74     0.57 o
   0  10  10    87.47    85.63     0.83 o
   1  10  10    76.75    77.90     0.86 o
   2  10  10     0.49     0.53     0.13 o
   3  10  10     7.10     7.04     0.18 o
   4  10  10     0.63     0.68     0.13 o
   5  10  10     0.34     0.43     0.12 o
   6  10  10     0.51     0.67     0.16 o
   7  10  10     2.44     3.19     0.30 o
  -3  11  10     0.55     0.96     0.52 <
  -2  11  10     4.68     4.97     0.33 o
  -1  11  10   124.05   122.19     1.48 o
   0  11  10     0.51     0.68     0.17 o
   1  11  10     4.11     4.35     0.25 o
   2  11  10     4.66     4.74     0.25 o
   3  11  10     1.82     1.99     0.22 o
   4  11  10     1.28     1.20     0.15 o
   5  11  10     0.40     0.56     0.16 o
   6  11  10     3.13     3.18     0.25 o
  -2  12  10   222.74   207.89     4.11 o
  -1  12  10     1.00     1.58     0.56 <
   0  12  10     0.07     0.38     0.34 <
   1  12  10     0.01    -0.03     0.25 <
   2  12  10     0.95     0.82     0.25 o
   3  12  10     2.44     2.44     0.24 o
   4  12  10     0.93     1.03     0.23 o
   5  12  10     5.74     5.94     0.30 o
   0  13  10     0.89     0.65     0.55 <
   1  13  10     2.42     1.97     0.39 o
   2  13  10     0.02     0.05     0.27 <
  -3 -10  11     0.86     0.85     0.22 o
  -2 -10  11     0.11     0.48     0.21 <
  -1 -10  11     2.60     3.02     0.28 o
   0 -10  11     5.64     5.81     0.63 o
   1 -10  11     0.23     0.62     0.52 <
  -5  -9  11     0.28     0.16     0.25 <
  -4  -9  11     0.17     0.04     0.24 <
  -3  -9  11     6.46     6.44     0.32 o
  -2  -9  11     0.91     0.78     0.23 o
  -1  -9  11     8.97     8.87     0.28 o
   0  -9  11    45.61    45.04     0.62 o
   1  -9  11    10.16     9.38     0.47 o
   2  -9  11     0.12     0.02     0.34 <
   3  -9  11     0.09     0.24     0.34 <
  -6  -8  11     0.25     0.17     0.41 <
  -5  -8  11     5.61     5.77     0.54 o
  -4  -8  11     2.10     2.27     0.19 o
  -3  -8  11     0.56     0.76     0.13 o
  -2  -8  11     4.09     4.69     0.16 o
  -1  -8  11    66.80    66.41     0.68 o
   0  -8  11   238.71   236.91     2.38 o
   1  -8  11    29.87    27.39     0.53 o
   2  -8  11     5.55     5.53     0.40 o
   3  -8  11     0.64     0.48     0.33 <
   4  -8  11     1.85     1.95     0.36 o
   5  -8  11     0.04     0.02     0.34 <
  -7  -7  11     0.11     0.01     0.34 <
  -6  -7  11     0.94     1.24     0.34 o
  -5  -7  11     0.05     0.13     0.18 <
  -4  -7  11     0.86     1.16     0.14 o
  -3  -7  11     1.36     1.59     0.15 o
  -2  -7  11     5.25     5.95     0.17 o
  -1  -7  11     0.73     0.43     0.11 o
   0  -7  11     1.54     1.35     0.11 o
   1  -7  11     0.24     0.21     0.19 <
   2  -7  11     0.15     0.39     0.22 <
   3  -7  11     6.31     5.20     0.38 o
   4  -7  11     0.14     0.64     0.31 <
   5  -7  11     0.72     0.64     0.33 <
   6  -7  11   165.82   170.24     3.46 o
  -8  -6  11     2.85     3.53     0.42 o
  -7  -6  11     0.74     1.01     0.27 o
  -6  -6  11     2.45     2.59     0.17 o
  -5  -6  11     7.25     7.41     0.19 o
  -4  -6  11     1.11     1.14     0.12 o
  -3  -6  11    20.00    20.72     0.27 o
  -2  -6  11   116.28   116.94     0.79 o
  -1  -6  11    18.07    17.06     0.21 o
   0  -6  11     0.23     0.27     0.10 <
   1  -6  11    12.26    12.46     0.17 o
   2  -6  11     6.58     7.02     0.31 o
   3  -6  11     0.99     1.55     0.22 o
   4  -6  11     0.03     0.15     0.21 <
   5  -6  11   157.86   159.60     2.18 o
   6  -6  11    76.49    80.19     1.45 o
   7  -6  11     1.59     2.10     0.43 o
  -8  -5  11     2.33     2.23     0.39 o
  -7  -5  11     1.23     1.35     0.27 o
  -6  -5  11    24.56    26.02     0.34 o
  -5  -5  11    14.24    15.16     0.22 o
  -4  -5  11    38.55    42.01     0.37 o
  -3  -5  11     6.53     6.96     0.15 o
  -2  -5  11     0.00     0.05     0.08 <
  -1  -5  11     3.60     3.73     0.11 o
   0  -5  11     0.59     0.17     0.07 <
   1  -5  11     2.38     2.10     0.08 o
   2  -5  11     5.63     5.00     0.12 o
   3  -5  11    13.70    14.51     0.31 o
   4  -5  11    46.46    49.11     0.61 o
   5  -5  11     0.10     0.29     0.21 <
   6  -5  11     8.32     8.33     0.50 o
   7  -5  11     0.05    -0.55     0.39 <
  -8  -4  11     4.85     4.54     0.43 o
  -7  -4  11     2.16     2.44     0.17 o
  -6  -4  11    56.43    54.98     0.45 o
  -5  -4  11    81.20    80.33     0.53 o
  -4  -4  11    24.79    24.24     0.27 o
  -3  -4  11     7.07     6.85     0.14 o
  -2  -4  11    37.14    35.76     0.27 o
  -1  -4  11    23.60    21.65     0.19 o
   0  -4  11     3.62     3.44     0.09 o
   1  -4  11     0.29     0.10     0.06 <
   3  -4  11     0.36     0.50     0.09 o
   4  -4  11     9.35    10.53     0.28 o
   5  -4  11     0.87     0.85     0.17 o
   6  -4  11     0.96     0.70     0.28 <
   7  -4  11     7.08     7.79     0.38 o
   8  -4  11     0.91     0.67     0.39 <
  -9  -3  11     0.10    -0.24     0.30 <
  -8  -3  11     1.04     1.32     0.27 o
  -7  -3  11   981.66   986.42     5.42 o
  -6  -3  11     7.32     7.49     0.17 o
  -5  -3  11    22.81    22.25     0.25 o
  -4  -3  11     1.14     1.15     0.10 o
  -3  -3  11    12.60    13.27     0.17 o
  -2  -3  11     0.12     0.17     0.07 <
   0  -3  11     2.46     2.41     0.08 o
   2  -3  11    59.12    54.70     0.32 o
   3  -3  11    30.45    30.47     0.24 o
   4  -3  11     7.82     8.32     0.14 o
   5  -3  11     1.21     1.42     0.18 o
   6  -3  11     0.00     0.08     0.17 <
   7  -3  11     0.00     0.62     0.25 <
   8  -3  11     0.00    -0.46     0.37 <
  -9  -2  11     3.98     3.58     0.35 o
  -8  -2  11   536.70   543.68     3.34 o
  -7  -2  11     0.28     0.28     0.14 <
  -6  -2  11    15.81    14.81     0.20 o
  -5  -2  11     0.31     0.33     0.10 o
  -4  -2  11    12.55    12.61     0.16 o
  -3  -2  11     0.81     0.87     0.09 o
  -2  -2  11   195.82   180.22     0.97 o
  -1  -2  11     0.00    -0.03     0.07 <
   1  -2  11     0.12     0.05     0.05 <
   2  -2  11    11.93    11.58     0.12 o
   3  -2  11     0.00    -0.02     0.06 <
   4  -2  11     6.21     6.43     0.12 o
   5  -2  11     3.04     2.83     0.11 o
   6  -2  11    17.05    17.15     0.35 o
   7  -2  11     2.12     2.10     0.26 o
   8  -2  11    21.91    22.80     0.48 o
   9  -2  11     8.28     7.90     0.44 o
  -9  -1  11     1.66     2.42     0.33 o
  -8  -1  11    93.80    97.34     0.76 o
  -7  -1  11    31.93    31.45     0.33 o
  -6  -1  11     1.96     1.95     0.12 o
  -5  -1  11     8.02     7.01     0.13 o
  -4  -1  11     1.95     2.11     0.09 o
  -3  -1  11    49.86    46.85     0.39 o
  -2  -1  11     4.27     4.10     0.10 o
  -1  -1  11  2248.90  2021.06    11.44 o
   2  -1  11     5.42     4.96     0.09 o
   3  -1  11     3.32     3.48     0.07 o
   4  -1  11     0.89     0.91     0.08 o
   5  -1  11     0.17     0.02     0.10 <
   6  -1  11     1.71     1.85     0.11 o
   7  -1  11   428.77   440.91     4.12 o
   8  -1  11     0.16     0.04     0.21 <
   9  -1  11     5.72     5.45     0.39 o
  -9   0  11    22.39    21.50     0.54 o
  -8   0  11     2.89     2.53     0.16 o
  -7   0  11     0.16     0.03     0.12 <
  -6   0  11     1.42     1.35     0.11 o
  -5   0  11     6.36     6.19     0.13 o
  -4   0  11     0.39     0.05     0.08 <
  -2   0  11  2232.76  2022.88     8.73 o
  -1   0  11   172.35   153.77     0.82 o
   1   0  11     9.07     8.45     0.11 o
   2   0  11     0.01     0.10     0.06 <
   3   0  11     1.16     1.07     0.06 o
   4   0  11   104.87    99.96     0.52 o
   5   0  11    66.38    65.18     0.46 o
   6   0  11   426.75   433.43     2.09 o
   7   0  11    19.75    18.71     0.22 o
   8   0  11     4.15     4.70     0.21 o
   9   0  11     0.03     0.07     0.27 <
  -9   1  11     1.16     1.80     0.39 o
  -8   1  11     4.69     4.30     0.31 o
  -7   1  11     6.83     7.47     0.17 o
  -6   1  11     8.53     7.90     0.15 o
  -5   1  11     1.16     1.09     0.09 o
  -3   1  11   208.80   228.71     1.14 o
  -2   1  11    18.18    16.73     0.14 o
   1   1  11     3.71     3.98     0.07 o
   2   1  11    17.01    16.70     0.14 o
   3   1  11    31.81    29.71     0.21 o
   5   1  11   248.37   240.23     1.41 o
   6   1  11    13.34    13.47     0.20 o
   7   1  11    10.92    11.73     0.19 o
   8   1  11     1.02     1.21     0.14 o
   9   1  11     5.83     5.83     0.40 o
  -9   2  11     1.07     0.94     0.36 <
  -8   2  11     0.75     1.10     0.26 o
  -7   2  11     0.02     0.01     0.19 <
  -6   2  11     4.53     4.84     0.14 o
  -5   2  11     0.67     0.89     0.09 o
  -3   2  11     6.09     6.20     0.10 o
  -2   2  11     5.18     5.27     0.08 o
  -1   2  11     8.54     8.23     0.08 o
   2   2  11     1.69     1.75     0.07 o
   3   2  11  1042.02   984.45     4.49 o
   4   2  11   388.80   377.08     1.89 o
   5   2  11     9.76     9.17     0.18 o
   6   2  11     0.87     0.60     0.10 o
   7   2  11     0.93     1.24     0.13 o
   8   2  11     1.59     1.76     0.16 o
   9   2  11     0.79     0.82     0.17 o
  -9   3  11     0.08     0.54     0.37 <
  -8   3  11     5.03     4.50     0.30 o
  -7   3  11    33.83    33.13     0.56 o
  -6   3  11     0.03     0.45     0.15 <
  -5   3  11     0.02     0.07     0.09 <
  -4   3  11    37.78    37.15     0.26 o
  -3   3  11     0.25     0.30     0.05 o
  -1   3  11     9.21     9.90     0.10 o
   0   3  11     5.21     4.56     0.08 o
   1   3  11    32.67    33.62     0.26 o
   2   3  11  2409.65  2343.82    10.55 o
   4   3  11     0.85     0.92     0.08 o
   5   3  11     1.57     1.95     0.10 o
   6   3  11    11.97    12.79     0.18 o
   7   3  11     0.06     0.20     0.11 <
   8   3  11    25.02    25.93     0.37 o
   9   3  11     0.44     0.58     0.18 o
  -9   4  11     6.01     6.88     0.57 o
  -8   4  11    24.11    25.89     0.53 o
  -7   4  11    86.64    84.56     0.87 o
  -6   4  11    71.91    69.85     0.91 o
  -5   4  11     8.11     8.64     0.18 o
  -4   4  11     3.23     2.82     0.09 o
  -3   4  11     0.01     0.21     0.06 o
  -2   4  11     0.39     0.31     0.05 o
  -1   4  11     0.01     0.00     0.05 <
   0   4  11    22.77    24.67     0.18 o
   1   4  11   590.47   599.96     2.55 o
   2   4  11    64.81    60.21     0.31 o
   3   4  11    50.04    51.24     0.35 o
   4   4  11     9.78     9.63     0.16 o
   5   4  11    13.43    12.61     0.19 o
   6   4  11     0.61     0.48     0.10 o
   7   4  11    19.29    18.81     0.30 o
   8   4  11    23.66    25.08     0.34 o
   9   4  11    35.70    35.06     0.89 o
  -8   5  11   370.87   376.79     3.74 o
  -7   5  11     3.49     3.55     0.24 o
  -6   5  11     0.41     0.72     0.18 o
  -5   5  11     0.04     0.18     0.12 <
  -4   5  11     7.61     7.80     0.17 o
  -3   5  11     3.02     3.18     0.08 o
  -2   5  11     8.22     8.37     0.10 o
  -1   5  11   324.89   342.81     1.35 o
   0   5  11   404.26   414.11     1.94 o
   1   5  11    13.56    13.88     0.13 o
   2   5  11    38.90    38.38     0.24 o
   3   5  11     0.64     0.48     0.07 o
   4   5  11     0.00     0.13     0.08 <
   5   5  11     0.85     1.01     0.11 o
   6   5  11     5.91     6.20     0.17 o
   7   5  11   208.37   208.93     1.39 o
   8   5  11   459.95   472.58     3.14 o
   9   5  11    16.15    16.56     0.49 o
  -8   6  11     0.00    -0.43     0.69 <
  -7   6  11     8.35     7.57     0.52 o
  -6   6  11     0.15     0.24     0.22 <
  -5   6  11     0.06     0.10     0.23 <
  -4   6  11     1.96     1.52     0.12 o
  -3   6  11     0.06     0.00     0.10 <
  -2   6  11     2.82     2.81     0.08 o
  -1   6  11    28.03    29.58     0.22 o
   0   6  11     8.32     8.52     0.13 o
   1   6  11    16.74    17.05     0.16 o
   2   6  11     0.61     0.63     0.07 o
   3   6  11     9.76     9.56     0.14 o
   4   6  11    19.78    18.95     0.22 o
   5   6  11     2.24     2.21     0.12 o
   6   6  11    82.75    78.23     0.69 o
   7   6  11   362.71   362.11     2.70 o
   8   6  11     0.03     0.20     0.18 <
   9   6  11     1.56     1.43     0.30 o
  -7   7  11     0.07     0.73     0.60 <
  -6   7  11     0.48     0.66     0.30 <
  -5   7  11     8.75     8.96     0.36 o
  -4   7  11     1.98     1.94     0.21 o
  -3   7  11   116.82   112.60     0.99 o
  -2   7  11   570.30   586.35     3.76 o
  -1   7  11     2.65     2.59     0.10 o
   0   7  11     4.42     4.58     0.11 o
   1   7  11     0.72     0.71     0.07 o
   2   7  11    20.45    20.55     0.19 o
   3   7  11     0.03     0.01     0.08 <
   4   7  11     9.86     9.06     0.17 o
   5   7  11    33.97    34.46     0.44 o
   6   7  11   386.26   385.57     2.84 o
   7   7  11     0.71     0.78     0.17 o
   8   7  11     0.00     0.28     0.32 <
   9   7  11     1.87     1.97     0.32 o
  -6   8  11     3.99     4.40     0.64 o
  -5   8  11    16.35    15.77     0.48 o
  -4   8  11    92.76    97.83     1.25 o
  -3   8  11    45.62    45.57     0.70 o
  -2   8  11     8.55     8.71     0.22 o
  -1   8  11     1.97     1.90     0.13 o
   0   8  11     0.44     0.62     0.08 o
   1   8  11     5.05     5.58     0.11 o
   2   8  11     0.02     0.07     0.08 <
   3   8  11   138.13   138.09     0.76 o
   5   8  11    28.07    27.40     0.37 o
   6   8  11     2.68     2.71     0.17 o
   7   8  11     0.03    -0.25     0.20 <
   8   8  11     0.09     0.11     0.33 <
  -5   9  11    76.58    78.14     2.03 o
  -4   9  11    17.61    17.11     0.50 o
  -3   9  11     1.08     0.96     0.25 o
  -2   9  11     0.65     0.65     0.20 o
  -1   9  11     0.02     0.03     0.15 <
   0   9  11     0.00     0.16     0.12 <
   1   9  11     7.12     7.00     0.15 o
   2   9  11    17.09    17.05     0.23 o
   3   9  11    67.93    73.78     0.61 o
   4   9  11    84.75    84.82     0.75 o
   5   9  11     5.92     5.94     0.19 o
   6   9  11     0.07     0.03     0.15 <
   7   9  11     0.43     0.33     0.31 <
   8   9  11     0.13    -0.06     0.34 <
  -4  10  11     3.09     2.16     0.59 o
  -3  10  11     0.81     0.75     0.26 <
  -2  10  11     0.70     0.85     0.26 o
  -1  10  11     8.44     8.61     0.36 o
   0  10  11     3.41     3.62     0.23 o
   1  10  11    39.24    40.06     0.51 o
   2  10  11   113.05   109.92     0.88 o
   3  10  11     3.81     4.11     0.15 o
   4  10  11    17.86    16.94     0.25 o
   5  10  11     0.40     0.69     0.14 o
   6  10  11     2.43     2.33     0.43 o
   7  10  11     0.49     0.37     0.32 <
  -3  11  11     0.04     0.13     0.36 <
  -2  11  11     1.77     1.98     0.29 o
  -1  11  11     1.24     1.59     0.28 o
   0  11  11     0.14     0.49     0.17 <
   1  11  11    57.39    57.65     0.74 o
   2  11  11     1.35     1.73     0.23 o
   3  11  11     0.52     0.87     0.21 o
   4  11  11     2.70     2.63     0.16 o
   5  11  11     0.38     0.48     0.22 <
   6  11  11     0.06     0.00     0.31 <
  -2  12  11    53.29    53.07     1.64 o
  -1  12  11     0.25    -0.33     0.56 <
   0  12  11     0.00    -0.11     0.54 <
   1  12  11     0.59     0.74     0.22 o
   2  12  11     1.98     1.85     0.21 o
   3  12  11     0.52     0.60     0.23 <
   4  12  11     0.10     0.00     0.23 <
  -4  -9  12     0.66     0.47     0.24 <
  -3  -9  12     8.22     8.47     0.35 o
  -2  -9  12     0.71     0.76     0.24 o
  -1  -9  12     0.95     0.87     0.30 <
   0  -9  12    13.74    14.04     0.41 o
   1  -9  12     0.33    -0.02     0.34 <
   2  -9  12     2.06     1.82     0.37 o
   3  -9  12    27.57    28.04     0.78 o
  -5  -8  12    11.28    12.37     0.71 o
  -4  -8  12     3.65     3.66     0.35 o
  -3  -8  12     0.18     0.21     0.14 <
  -2  -8  12     0.18     0.35     0.12 <
  -1  -8  12     9.95     9.87     0.30 o
   0  -8  12    28.22    27.97     0.54 o
   1  -8  12   373.17   370.69     3.55 o
   2  -8  12    76.06    76.42     1.30 o
   3  -8  12     3.16     2.67     0.39 o
   4  -8  12     2.77     2.91     0.39 o
  -6  -7  12     0.04    -0.13     0.33 <
  -5  -7  12     0.30     0.53     0.32 <
  -4  -7  12     1.97     2.26     0.16 o
  -3  -7  12     0.64     0.92     0.15 o
  -2  -7  12     0.05     0.16     0.13 <
  -1  -7  12     2.10     2.02     0.13 o
   0  -7  12   579.47   583.90     3.25 o
   1  -7  12     1.15     1.24     0.19 o
   2  -7  12     1.53     1.27     0.31 o
   3  -7  12     2.27     2.16     0.33 o
   4  -7  12     0.58     1.14     0.33 o
   5  -7  12     0.53     0.81     0.34 <
  -7  -6  12     5.78     6.45     0.46 o
  -6  -6  12     1.91     1.96     0.21 o
  -5  -6  12     1.27     1.27     0.13 o
  -4  -6  12     1.72     1.78     0.14 o
  -3  -6  12     0.09     0.13     0.12 <
  -2  -6  12   157.08   160.15     1.04 o
  -1  -6  12    13.15    13.68     0.21 o
   0  -6  12     0.10     0.13     0.10 <
   1  -6  12    35.11    34.94     0.35 o
   2  -6  12     3.37     2.69     0.25 o
   3  -6  12     1.02     1.37     0.20 o
   4  -6  12     0.02    -0.15     0.22 <
   5  -6  12     4.63     4.15     0.37 o
   6  -6  12    32.34    34.40     1.24 o
  -8  -5  12     0.30     0.20     0.37 <
  -7  -5  12     0.00    -0.13     0.26 <
  -6  -5  12     3.83     4.15     0.19 o
  -5  -5  12     9.33     9.50     0.21 o
  -4  -5  12     0.69     0.59     0.11 o
  -3  -5  12   162.62   166.25     1.00 o
  -2  -5  12    59.89    59.25     0.48 o
  -1  -5  12     5.98     6.28     0.14 o
   0  -5  12     0.15     0.18     0.08 <
   1  -5  12     1.07     0.92     0.08 o
   2  -5  12     0.77     0.68     0.08 o
   3  -5  12     3.86     4.22     0.24 o
   4  -5  12     1.23     1.17     0.23 o
   5  -5  12     0.01     0.53     0.24 <
   6  -5  12   457.37   466.34     5.55 o
   7  -5  12     0.00    -0.51     0.39 <
  -8  -4  12     9.86    10.11     0.52 o
  -7  -4  12     0.79     0.79     0.17 o
  -6  -4  12     3.13     2.74     0.14 o
  -5  -4  12     7.53     7.39     0.18 o
  -4  -4  12   417.96   429.90     2.32 o
  -3  -4  12    32.32    31.81     0.32 o
  -2  -4  12    17.35    17.55     0.19 o
  -1  -4  12    16.52    15.55     0.17 o
   0  -4  12     9.81     9.15     0.13 o
   1  -4  12     1.39     1.21     0.08 o
   2  -4  12     9.36     8.47     0.13 o
   3  -4  12     0.02     0.29     0.10 o
   4  -4  12   182.99   193.47     1.70 o
   5  -4  12     0.02     0.21     0.17 <
   6  -4  12     0.94     0.83     0.34 <
   7  -4  12     8.04     7.36     0.50 o
   8  -4  12     1.11     1.23     0.41 <
  -8  -3  12     0.35     0.22     0.34 <
  -7  -3  12    37.12    38.46     0.42 o
  -6  -3  12     0.14     0.12     0.11 <
  -5  -3  12   316.47   334.84     1.77 o
  -4  -3  12     2.23     2.01     0.12 o
  -3  -3  12     1.23     1.53     0.10 o
  -2  -3  12     0.23     0.25     0.07 o
  -1  -3  12     2.91     2.57     0.10 o
   0  -3  12     0.02     0.04     0.07 <
   3  -3  12    53.17    50.71     0.38 o
   4  -3  12    33.12    32.88     0.28 o
   5  -3  12    10.91    11.67     0.42 o
   6  -3  12     0.04     0.22     0.23 <
   7  -3  12     0.23     0.30     0.35 <
   8  -3  12     0.02    -0.32     0.39 <
  -9  -2  12     4.02     3.68     0.35 o
  -8  -2  12     2.66     3.53     0.33 o
  -7  -2  12    14.66    14.78     0.27 o
  -6  -2  12   156.84   155.70     0.97 o
  -5  -2  12     0.12     0.16     0.10 <
  -4  -2  12    22.52    22.94     0.24 o
  -3  -2  12     0.08    -0.04     0.08 <
  -2  -2  12   107.71   101.50     0.64 o
  -1  -2  12     0.43     0.49     0.08 o
   0  -2  12     0.14     0.08     0.06 <
   1  -2  12     0.30     0.35     0.06 o
   3  -2  12     0.01     0.01     0.07 <
   4  -2  12     1.55     2.08     0.10 o
   5  -2  12     0.84     0.72     0.12 o
   6  -2  12    12.09    12.54     0.34 o
   7  -2  12     1.79     2.47     0.37 o
   8  -2  12     2.27     2.74     0.41 o
  -9  -1  12     1.16     1.47     0.32 o
  -8  -1  12   242.30   250.66     1.70 o
  -7  -1  12   375.26   371.80     1.96 o
  -6  -1  12     0.76     0.84     0.11 o
  -5  -1  12    12.55    11.70     0.18 o
  -4  -1  12     0.09     0.14     0.09 <
  -3  -1  12    27.38    26.77     0.26 o
  -2  -1  12     0.31     0.34     0.07 o
  -1  -1  12     0.01    -0.02     0.08 <
   2  -1  12     3.97     3.82     0.08 o
   3  -1  12    16.66    17.51     0.15 o
   4  -1  12     0.26     0.23     0.07 o
   5  -1  12     0.09     0.00     0.10 <
   6  -1  12     0.27     0.33     0.12 <
   7  -1  12     0.51     0.68     0.24 <
   8  -1  12     0.17     0.50     0.30 <
   9  -1  12     7.11     5.66     0.39 o
  -9   0  12   467.78   468.27     4.67 o
  -8   0  12    18.60    18.72     0.29 o
  -7   0  12     0.00     0.31     0.12 <
  -6   0  12     2.26     2.18     0.12 o
  -5   0  12     6.64     6.74     0.14 o
  -4   0  12     0.53     0.84     0.09 o
  -3   0  12    93.71    85.48     0.57 o
  -1   0  12  1105.35   988.41     4.73 o
   2   0  12     0.27     0.52     0.05 o
   3   0  12     3.51     2.91     0.08 o
   4   0  12    31.95    31.39     0.25 o
   5   0  12    15.19    15.27     0.21 o
   6   0  12    28.40    27.58     0.28 o
   7   0  12    16.17    14.23     0.22 o
   8   0  12    13.72    14.77     0.47 o
   9   0  12     0.14     0.25     0.31 <
  -9   1  12     5.26     5.14     0.55 o
  -8   1  12    20.65    20.58     0.43 o
  -7   1  12     4.44     4.74     0.15 o
  -6   1  12     8.27     7.78     0.16 o
  -5   1  12     0.13     0.17     0.09 <
  -4   1  12    50.92    46.91     0.32 o
  -3   1  12    79.75    84.51     0.52 o
  -2   1  12   268.08   245.35     1.10 o
   2   1  12    35.92    35.04     0.23 o
   3   1  12     3.09     3.16     0.08 o
   4   1  12     8.88     9.32     0.13 o
   5   1  12     0.23     0.14     0.11 <
   6   1  12   273.37   275.01     1.62 o
   7   1  12    73.00    75.46     0.59 o
   8   1  12     0.75     0.89     0.14 o
   9   1  12     3.93     4.07     0.38 o
  -9   2  12     3.07     2.63     0.39 o
  -8   2  12     0.70     0.41     0.25 <
  -7   2  12     0.00     0.33     0.23 <
  -6   2  12     4.81     5.15     0.13 o
  -5   2  12     5.16     5.12     0.12 o
  -4   2  12   108.08   120.03     0.62 o
  -3   2  12  1765.40  1590.12     6.40 o
  -2   2  12    15.78    15.72     0.13 o
  -1   2  12    41.50    38.29     0.22 o
   1   2  12     6.45     7.20     0.12 o
   2   2  12     4.54     4.12     0.10 o
   3   2  12    19.51    18.88     0.16 o
   4   2  12    90.60    86.31     0.55 o
   5   2  12  1645.05  1644.38     9.38 o
   6   2  12     2.32     2.28     0.12 o
   7   2  12     1.66     1.26     0.13 o
   8   2  12     0.59     0.78     0.14 o
   9   2  12     0.00    -0.11     0.18 <
  -9   3  12     2.12     2.63     0.39 o
  -8   3  12     2.02     2.89     0.29 o
  -7   3  12    15.58    15.74     0.36 o
  -6   3  12     0.75     0.29     0.16 <
  -5   3  12     7.44     6.61     0.14 o
  -4   3  12   383.85   355.52     1.53 o
  -3   3  12     0.54     0.60     0.06 o
  -2   3  12     9.06     8.01     0.09 o
  -1   3  12     0.04     0.00     0.05 <
   0   3  12     0.05     0.13     0.06 <
   1   3  12    28.70    29.33     0.26 o
   2   3  12     0.57     0.70     0.07 o
   4   3  12    98.05    95.33     0.60 o
   5   3  12     0.97     1.08     0.11 o
   6   3  12    27.12    28.84     0.27 o
   7   3  12     0.08     0.01     0.11 <
   8   3  12    11.00    11.94     0.28 o
   9   3  12     0.04     0.47     0.39 <
  -8   4  12     0.34     0.36     0.25 <
  -7   4  12    10.29    10.08     0.31 o
  -6   4  12   251.66   254.90     2.53 o
  -5   4  12    49.01    53.76     0.44 o
  -4   4  12     1.80     2.10     0.09 o
  -2   4  12     7.35     6.99     0.09 o
  -1   4  12     3.15     3.27     0.08 o
   0   4  12     0.04     0.13     0.06 <
   1   4  12    14.61    14.35     0.17 o
   2   4  12   486.31   445.93     2.33 o
   3   4  12   393.16   399.73     2.23 o
   4   4  12     0.80     0.69     0.09 o
   5   4  12    14.36    14.11     0.19 o
   6   4  12     5.77     5.27     0.14 o
   7   4  12     5.30     5.61     0.17 o
   8   4  12     2.01     2.36     0.16 o
   9   4  12     0.00    -0.45     0.53 <
  -8   5  12   151.17   153.14     1.83 o
  -7   5  12    15.13    14.48     0.36 o
  -6   5  12     5.80     5.59     0.25 o
  -5   5  12     0.02     0.13     0.13 <
  -4   5  12    14.70    14.79     0.23 o
  -3   5  12     3.47     3.47     0.10 o
  -2   5  12     0.06     0.01     0.06 <
  -1   5  12    20.35    20.23     0.16 o
   0   5  12    77.37    80.70     0.48 o
   1   5  12   543.25   522.55     2.56 o
   2   5  12    95.83    96.15     0.53 o
   3   5  12     2.80     2.75     0.10 o
   4   5  12     1.36     1.81     0.11 o
   5   5  12     0.36     0.44     0.10 o
   6   5  12     2.31     2.70     0.13 o
   7   5  12    16.49    17.36     0.29 o
   8   5  12    34.69    34.94     0.48 o
   9   5  12    67.50    67.64     1.20 o
  -8   6  12    59.84    63.30     1.94 o
  -7   6  12     8.68     8.51     0.40 o
  -6   6  12     2.44     1.80     0.25 o
  -5   6  12     3.16     3.52     0.28 o
  -4   6  12     1.58     1.16     0.15 o
  -3   6  12     0.88     1.11     0.11 o
  -2   6  12     0.48     0.64     0.07 o
  -1   6  12     3.08     3.25     0.09 o
   1   6  12    22.21    22.79     0.19 o
   2   6  12     7.48     7.72     0.12 o
   3   6  12     4.72     4.89     0.12 o
   4   6  12    13.07    12.50     0.18 o
   5   6  12     0.71     0.61     0.12 o
   6   6  12     1.92     2.09     0.15 o
   7   6  12   143.09   145.03     1.25 o
   8   6  12     6.74     7.12     0.42 o
   9   6  12     2.74     2.32     0.36 o
  -7   7  12     0.92     0.56     0.62 <
  -6   7  12     0.35     0.30     0.31 <
  -5   7  12     4.62     4.61     0.30 o
  -4   7  12     0.39     0.53     0.18 <
  -3   7  12     0.26     0.18     0.16 <
  -2   7  12   817.47   834.33     5.24 o
  -1   7  12     7.73     6.85     0.13 o
   0   7  12     0.72     0.77     0.09 o
   1   7  12     0.01     0.02     0.07 <
   2   7  12    14.02    13.88     0.17 o
   3   7  12     0.88     1.15     0.09 o
   4   7  12     1.90     1.87     0.12 o
   5   7  12     0.00    -0.02     0.12 <
   6   7  12   487.51   491.47     3.54 o
   7   7  12   130.80   139.98     1.22 o
   8   7  12     0.35     0.35     0.33 <
  -6   8  12     1.49     1.87     0.60 o
  -5   8  12     1.55     1.67     0.39 o
  -4   8  12     5.54     6.16     0.29 o
  -3   8  12   424.36   411.17     3.04 o
  -2   8  12    94.73    95.65     0.93 o
  -1   8  12     1.20     1.43     0.14 o
   0   8  12     2.80     3.09     0.10 o
   1   8  12    13.20    13.50     0.16 o
   2   8  12     0.20     0.19     0.08 <
   3   8  12    23.25    22.99     0.25 o
   4   8  12     2.71     2.52     0.13 o
   5   8  12   211.68   208.02     1.51 o
   6   8  12    12.17    11.60     0.27 o
   7   8  12     3.07     3.73     0.38 o
   8   8  12     0.13     0.11     0.32 <
  -5   9  12    13.15    15.14     0.89 o
  -4   9  12    32.04    32.45     0.66 o
  -3   9  12     9.33     9.48     0.38 o
  -2   9  12    25.91    26.49     0.46 o
  -1   9  12     0.17     0.19     0.15 <
   0   9  12     0.47     0.75     0.14 o
   1   9  12     4.29     4.12     0.13 o
   2   9  12     3.85     3.77     0.13 o
   3   9  12     1.31     0.78     0.13 o
   4   9  12   328.98   324.45     2.06 o
   5   9  12    42.12    42.45     0.46 o
   6   9  12    12.29    12.43     0.28 o
   7   9  12     2.01     2.20     0.35 o
  -4  10  12    10.78    10.63     0.82 o
  -3  10  12     0.26     0.31     0.27 <
  -2  10  12     0.02    -0.18     0.25 <
  -1  10  12     5.70     6.25     0.33 o
   0  10  12     4.22     3.97     0.24 o
   1  10  12     0.00     0.11     0.19 <
   2  10  12    72.44    72.68     0.60 o
   3  10  12   380.22   369.20     2.33 o
   4  10  12    63.32    62.24     0.54 o
   5  10  12     0.02    -0.08     0.14 <
   6  10  12     4.96     5.52     0.42 o
   7  10  12     0.55     0.68     0.35 <
  -3  11  12     0.84     0.92     0.38 <
  -2  11  12     0.03    -0.44     0.36 <
  -1  11  12     0.07     0.21     0.25 <
   0  11  12     0.22     0.21     0.18 <
   1  11  12    72.16    74.75     0.79 o
   2  11  12     0.77     0.91     0.19 o
   3  11  12     0.19    -0.03     0.21 <
   4  11  12    16.28    15.57     0.26 o
   5  11  12     2.59     2.98     0.31 o
   6  11  12     0.00    -0.38     0.33 <
  -2  12  12     6.07     7.04     0.76 o
  -1  12  12     0.05    -0.10     0.35 <
   0  12  12     4.18     4.47     0.65 o
   1  12  12     3.08     2.81     0.26 o
   2  12  12     0.11     0.39     0.23 <
   3  12  12     0.00    -0.04     0.23 <
   4  12  12     1.05     0.97     0.24 o
  -3  -9  13     9.53     9.97     0.38 o
  -2  -9  13     2.52     2.36     0.35 o
  -1  -9  13     0.28     0.59     0.30 <
   0  -9  13     4.97     5.09     0.38 o
   1  -9  13     0.65     0.87     0.35 <
   2  -9  13     0.01    -0.16     0.36 <
  -5  -8  13   186.88   184.95     3.54 o
  -4  -8  13     2.31     2.95     0.27 o
  -3  -8  13     0.11     0.47     0.21 <
  -2  -8  13     0.08     0.16     0.14 <
  -1  -8  13     3.13     3.06     0.28 o
   0  -8  13    10.53    10.58     0.36 o
   1  -8  13     1.01     0.99     0.32 o
   2  -8  13    66.96    63.65     1.17 o
   3  -8  13   147.03   144.27     2.08 o
   4  -8  13     0.85     0.82     0.37 <
  -6  -7  13     0.12     0.09     0.35 <
  -5  -7  13     0.47     0.42     0.32 <
  -4  -7  13     1.30     1.10     0.22 o
  -3  -7  13     1.71     2.03     0.15 o
  -2  -7  13     1.36     1.28     0.15 o
  -1  -7  13     0.67     0.61     0.14 o
   0  -7  13    58.44    58.28     0.48 o
   1  -7  13    41.80    39.83     0.65 o
   2  -7  13     7.33     6.90     0.41 o
   3  -7  13     1.58     1.20     0.34 o
   4  -7  13     1.28     1.42     0.35 o
   5  -7  13     2.24     2.11     0.37 o
  -7  -6  13    21.81    23.56     0.72 o
  -6  -6  13     3.26     3.01     0.29 o
  -5  -6  13     1.11     1.12     0.15 o
  -4  -6  13     2.36     2.77     0.16 o
  -3  -6  13     0.05     0.08     0.13 <
  -2  -6  13     9.74    10.35     0.19 o
  -1  -6  13     0.95     0.86     0.13 o
   0  -6  13    14.53    13.80     0.22 o
   1  -6  13   146.44   143.91     0.93 o
   2  -6  13     3.46     3.45     0.27 o
   3  -6  13     0.19     0.40     0.22 <
   4  -6  13     0.10     0.04     0.23 <
   5  -6  13     0.51     0.45     0.31 <
   6  -6  13     2.78     3.09     0.58 o
  -7  -5  13     0.56     0.53     0.36 <
  -6  -5  13     0.18     0.30     0.21 <
  -5  -5  13     5.99     6.28     0.19 o
  -4  -5  13     2.42     2.46     0.14 o
  -3  -5  13     4.58     4.39     0.14 o
  -2  -5  13    37.91    39.53     0.37 o
  -1  -5  13   174.57   180.13     1.11 o
   0  -5  13     0.02     0.09     0.09 <
   1  -5  13     0.61     0.64     0.09 o
   2  -5  13     0.07     0.16     0.09 <
   3  -5  13     2.02     1.99     0.23 o
   4  -5  13     3.60     4.31     0.28 o
   5  -5  13     0.00    -0.18     0.21 <
   6  -5  13   239.52   241.18     3.19 o
   7  -5  13    98.30   102.92     1.74 o
  -8  -4  13    15.96    17.32     0.64 o
  -7  -4  13     0.03    -0.15     0.23 <
  -6  -4  13     0.57     0.46     0.14 o
  -5  -4  13     0.77     0.91     0.13 o
  -4  -4  13     1.39     1.76     0.13 o
  -3  -4  13    11.49    11.60     0.19 o
  -2  -4  13     8.43     9.20     0.15 o
  -1  -4  13     7.07     6.88     0.13 o
   0  -4  13    20.55    19.75     0.20 o
   1  -4  13     5.89     5.92     0.12 o
   2  -4  13     5.47     5.25     0.12 o
   3  -4  13     0.76     1.22     0.11 o
   4  -4  13     0.55     0.46     0.18 <
   5  -4  13    37.60    40.60     0.69 o
   6  -4  13    14.43    13.94     0.58 o
   7  -4  13     6.85     6.79     0.51 o
  -8  -3  13     0.02     0.01     0.35 <
  -7  -3  13     1.76     1.97     0.18 o
  -6  -3  13     0.37     0.24     0.12 <
  -5  -3  13    35.36    36.25     0.36 o
  -4  -3  13     0.25     0.36     0.12 o
  -3  -3  13     8.32     7.38     0.16 o
  -2  -3  13     0.00     0.03     0.08 <
  -1  -3  13     1.17     1.38     0.10 o
   0  -3  13     0.00     0.00     0.07 <
   1  -3  13     7.77     6.99     0.11 o
   2  -3  13     2.00     1.66     0.08 o
   3  -3  13     0.44     0.39     0.10 o
   4  -3  13    30.03    30.99     0.29 o
   5  -3  13   168.30   173.53     1.85 o
   6  -3  13     2.55     2.10     0.31 o
   7  -3  13     1.46     0.27     0.36 <
   8  -3  13     0.00    -0.14     0.39 <
  -8  -2  13     1.08     1.28     0.30 o
  -7  -2  13     0.82     0.77     0.14 o
  -6  -2  13    55.68    54.08     0.47 o
  -5  -2  13    56.30    56.63     0.50 o
  -4  -2  13    42.69    42.72     0.40 o
  -3  -2  13     0.99     0.98     0.10 o
  -2  -2  13    56.43    54.25     0.41 o
  -1  -2  13     1.78     1.67     0.09 o
   0  -2  13     4.87     4.55     0.10 o
   1  -2  13     0.01     0.02     0.07 <
   3  -2  13     0.03     0.07     0.08 <
   5  -2  13     0.06     0.21     0.12 <
   6  -2  13     8.08     7.54     0.36 o
   7  -2  13     1.52     1.98     0.37 o
   8  -2  13     3.25     3.39     0.43 o
  -9  -1  13     0.00     0.07     0.30 <
  -8  -1  13     0.38     0.14     0.29 <
  -7  -1  13   444.43   447.84     2.58 o
  -6  -1  13   452.10   460.37     2.49 o
  -5  -1  13    13.44    12.90     0.20 o
  -4  -1  13     7.40     6.86     0.14 o
  -3  -1  13    14.31    14.82     0.20 o
  -2  -1  13     0.59     0.33     0.09 o
  -1  -1  13     1.20     0.76     0.07 o
   0  -1  13     5.37     4.92     0.10 o
   2  -1  13    52.79    47.47     0.31 o
   3  -1  13    35.87    36.72     0.24 o
   4  -1  13     0.27     0.29     0.09 o
   5  -1  13     1.34     1.31     0.11 o
   6  -1  13     0.03     0.12     0.12 <
   7  -1  13     0.46     0.87     0.26 o
   8  -1  13     0.03     0.62     0.37 <
   9  -1  13     3.53     3.61     0.44 o
  -9   0  13    10.54     9.05     0.50 o
  -8   0  13   109.43   112.84     0.92 o
  -7   0  13    17.58    16.41     0.24 o
  -6   0  13     6.63     6.54     0.16 o
  -5   0  13     3.63     3.72     0.12 o
  -4   0  13     1.27     1.40     0.10 o
  -3   0  13    23.67    22.35     0.24 o
  -2   0  13    43.08    39.09     0.28 o
  -1   0  13     0.89     0.72     0.06 o
   0   0  13     0.73     0.47     0.06 o
   2   0  13     5.01     5.10     0.10 o
   4   0  13    11.86    11.78     0.17 o
   5   0  13     7.36     6.87     0.19 o
   6   0  13    13.06    13.41     0.24 o
   7   0  13     0.01     0.18     0.13 <
   8   0  13    17.39    18.23     0.64 o
   9   0  13     3.01     2.19     0.41 o
  -9   1  13    46.68    45.02     1.16 o
  -8   1  13   140.19   146.66     2.18 o
  -7   1  13     2.99     2.88     0.15 o
  -6   1  13     4.63     4.16     0.14 o
  -5   1  13     0.71     0.67     0.10 o
  -4   1  13    11.46    11.08     0.17 o
  -3   1  13    17.42    17.92     0.18 o
  -2   1  13     8.22     7.76     0.11 o
  -1   1  13   438.73   433.69     1.96 o
   1   1  13     0.48     0.20     0.06 o
   2   1  13    48.55    46.31     0.27 o
   3   1  13     0.30     0.34     0.07 o
   4   1  13     4.75     4.77     0.12 o
   5   1  13     0.01     0.02     0.13 <
   6   1  13     2.63     2.38     0.14 o
   7   1  13   211.47   216.92     1.34 o
   8   1  13    48.11    52.09     0.47 o
   9   1  13     4.42     4.93     0.45 o
  -9   2  13    17.42    16.50     0.74 o
  -8   2  13     0.00     0.30     0.33 <
  -7   2  13     0.01     0.16     0.21 <
  -6   2  13     2.22     2.39     0.15 o
  -5   2  13     4.99     4.99     0.13 o
  -4   2  13    11.07    11.86     0.15 o
  -3   2  13   427.73   387.20     1.64 o
  -1   2  13   171.41   157.13     0.72 o
   0   2  13    17.16    19.53     0.17 o
   1   2  13    11.51    12.01     0.15 o
   2   2  13     1.88     1.76     0.08 o
   3   2  13     0.23     0.33     0.07 o
   4   2  13     9.70     9.51     0.17 o
   5   2  13   195.31   194.12     1.27 o
   7   2  13    33.63    31.68     0.37 o
   8   2  13     3.89     3.83     0.18 o
   9   2  13     0.03    -0.48     0.38 <
  -8   3  13     2.00     1.68     0.34 o
  -7   3  13     8.24     8.13     0.29 o
  -6   3  13     0.91     0.88     0.23 o
  -5   3  13     0.32     0.36     0.10 o
  -4   3  13   480.24   448.01     1.98 o
  -2   3  13     7.52     6.77     0.10 o
  -1   3  13     3.92     3.62     0.08 o
   0   3  13     7.80     8.07     0.12 o
   1   3  13    22.79    22.59     0.25 o
   2   3  13     6.25     5.81     0.11 o
   3   3  13     1.27     1.10     0.09 o
   4   3  13    89.21    91.52     0.63 o
   5   3  13    71.58    70.84     0.58 o
   6   3  13    54.43    56.74     0.44 o
   7   3  13     0.29     0.48     0.12 o
   8   3  13     4.77     5.22     0.19 o
   9   3  13     0.17     0.11     0.39 <
  -8   4  13     0.05    -0.06     0.33 <
  -7   4  13     2.34     2.43     0.23 o
  -6   4  13     2.57     2.43     0.21 o
  -5   4  13   319.85   328.58     2.44 o
  -4   4  13   331.31   329.56     1.55 o
  -3   4  13     9.65    10.29     0.13 o
  -2   4  13    25.96    25.03     0.17 o
  -1   4  13     4.26     4.07     0.09 o
   0   4  13     0.50     0.46     0.07 o
   1   4  13     8.30     7.78     0.14 o
   2   4  13     2.25     2.49     0.09 o
   3   4  13   325.93   317.52     1.71 o
   4   4  13   154.55   160.69     1.01 o
   5   4  13     4.53     4.49     0.14 o
   6   4  13    31.82    31.37     0.31 o
   7   4  13     1.63     1.85     0.14 o
   8   4  13     0.02     0.24     0.16 <
   9   4  13     0.09     0.25     0.53 <
  -8   5  13    16.57    15.77     0.66 o
  -7   5  13     2.69     2.51     0.24 o
  -6   5  13    80.68    82.41     0.77 o
  -5   5  13     9.33     8.86     0.27 o
  -4   5  13    31.95    31.38     0.34 o
  -3   5  13     1.79     2.11     0.09 o
  -2   5  13     0.27     0.25     0.07 o
  -1   5  13     0.94     0.96     0.07 o
   0   5  13    21.78    22.24     0.22 o
   1   5  13    57.10    58.26     0.41 o
   2   5  13   727.58   711.06     3.65 o
   3   5  13    97.56   100.95     0.62 o
   4   5  13     1.94     2.26     0.11 o
   5   5  13     0.18     0.14     0.11 <
   6   5  13     2.89     3.32     0.14 o
   7   5  13     1.68     1.74     0.14 o
   8   5  13     4.06     4.17     0.22 o
   9   5  13     6.18     7.28     0.71 o
  -7   6  13   288.53   288.38     2.96 o
  -6   6  13     5.56     4.75     0.29 o
  -5   6  13    26.18    25.51     0.54 o
  -4   6  13     0.38     0.11     0.16 <
  -3   6  13     5.54     5.63     0.16 o
  -2   6  13     5.23     5.61     0.11 o
  -1   6  13     1.25     1.17     0.08 o
   0   6  13     8.21     8.08     0.14 o
   1   6  13  1232.15  1240.78     5.67 o
   2   6  13    50.38    48.33     0.35 o
   3   6  13     5.06     5.14     0.12 o
   4   6  13     6.95     6.89     0.14 o
   5   6  13     0.10     0.18     0.11 <
   6   6  13     0.70     0.57     0.13 o
   7   6  13     7.65     8.29     0.23 o
   8   6  13     0.86     1.03     0.33 o
   9   6  13     0.22     0.89     0.34 <
  -7   7  13     1.10     1.09     0.45 <
  -6   7  13     0.01     0.46     0.37 <
  -5   7  13     4.11     4.32     0.27 o
  -4   7  13     0.01     0.08     0.19 <
  -3   7  13     1.57     1.32     0.18 o
  -2   7  13    10.11     9.82     0.22 o
  -1   7  13     9.86     9.84     0.14 o
   0   7  13   870.23   889.71     4.55 o
   1   7  13     0.32     0.41     0.08 o
   2   7  13     8.94     9.21     0.15 o
   3   7  13     3.01     2.96     0.12 o
   4   7  13     0.00    -0.07     0.11 <
   5   7  13     0.12     0.01     0.12 <
   6   7  13    11.11    11.30     0.25 o
   7   7  13    89.58    93.13     0.91 o
   8   7  13    12.98    13.35     0.53 o
  -6   8  13     3.01     2.73     0.62 o
  -5   8  13     0.57     0.21     0.36 <
  -4   8  13     2.52     2.69     0.25 o
  -3   8  13     0.02     0.02     0.18 <
  -2   8  13    89.65    90.04     1.04 o
  -1   8  13    50.24    52.36     0.64 o
   0   8  13     4.81     4.87     0.12 o
   1   8  13    30.48    30.93     0.26 o
   2   8  13     0.63     0.53     0.09 o
   3   8  13    10.72    10.15     0.19 o
   4   8  13     2.06     1.84     0.13 o
   5   8  13     0.01     0.14     0.12 <
   6   8  13    98.36    97.75     0.79 o
   7   8  13   199.45   203.29     2.66 o
   8   8  13     0.17     0.36     0.34 <
  -6   9  13     0.01    -0.12     0.58 <
  -5   9  13     1.49     1.63     0.58 <
  -4   9  13     1.31     0.86     0.28 o
  -3   9  13    46.11    46.03     0.78 o
  -2   9  13   302.20   297.42     2.98 o
  -1   9  13     7.92     7.26     0.31 o
   0   9  13     0.65     0.86     0.17 o
   1   9  13     0.62     0.65     0.10 o
   2   9  13     1.13     1.20     0.11 o
   3   9  13     0.76     0.79     0.12 o
   4   9  13     0.88     1.06     0.16 o
   5   9  13   230.55   232.78     1.46 o
   6   9  13   369.19   370.11     2.37 o
   7   9  13     1.18     0.84     0.32 <
  -5  10  13     1.02     1.08     0.62 <
  -4  10  13   244.60   232.83     4.46 o
  -3  10  13     1.09     0.98     0.28 o
  -2  10  13     3.65     3.42     0.31 o
  -1  10  13     7.99     7.29     0.34 o
   0  10  13     4.35     4.36     0.23 o
   1  10  13     0.01    -0.12     0.19 <
   2  10  13     6.17     5.96     0.19 o
   3  10  13    34.77    34.97     0.41 o
   4  10  13   466.00   466.33     2.70 o
   5  10  13     2.07     2.10     0.19 o
   6  10  13     4.46     4.45     0.41 o
  -3  11  13     8.95     8.17     0.54 o
  -2  11  13     0.00     0.07     0.37 <
  -1  11  13     1.33     1.09     0.27 o
   0  11  13     0.00    -0.20     0.22 <
   1  11  13     3.52     3.32     0.22 o
   2  11  13     4.61     3.28     0.25 o
   3  11  13     0.01     0.19     0.22 <
   4  11  13    34.59    33.98     0.44 o
   5  11  13    26.20    25.10     0.60 o
  -2  12  13     1.83     1.40     0.40 o
  -1  12  13     0.18     0.69     0.37 <
   0  12  13     1.67     1.10     0.54 <
   1  12  13     2.34     3.06     0.31 o
   2  12  13   206.76   201.00     1.89 o
   3  12  13     0.16     0.35     0.23 <
   4  12  13    12.00    11.79     0.45 o
  -1  -9  14     9.34     9.12     0.46 o
   0  -9  14     3.55     3.32     0.34 o
  -4  -8  14     1.08     0.77     0.25 o
  -3  -8  14     0.34    -0.22     0.29 <
  -2  -8  14     1.31     1.67     0.26 o
  -1  -8  14     2.82     3.03     0.34 o
   0  -8  14     3.13     3.15     0.27 o
   1  -8  14     2.46     2.47     0.37 o
   2  -8  14     0.06     0.17     0.34 <
   3  -8  14   155.25   151.40     2.17 o
  -5  -7  14     4.83     4.51     0.43 o
  -4  -7  14     0.03     0.39     0.33 <
  -3  -7  14     1.53     1.73     0.16 o
  -2  -7  14     6.45     6.66     0.22 o
  -1  -7  14     0.09     0.12     0.13 <
   0  -7  14    27.18    27.88     0.48 o
   1  -7  14     0.03     0.27     0.23 <
   2  -7  14     0.80     0.71     0.33 <
   3  -7  14     1.27     1.34     0.36 o
   4  -7  14     0.04     0.47     0.36 <
  -6  -6  14    21.74    21.44     0.69 o
  -5  -6  14     7.62     7.63     0.31 o
  -4  -6  14     3.51     3.97     0.18 o
  -3  -6  14     0.30     0.22     0.14 <
  -2  -6  14     1.68     2.02     0.16 o
  -1  -6  14     0.75     0.72     0.14 o
   0  -6  14     2.57     2.73     0.14 o
   1  -6  14   742.40   754.58     4.16 o
   2  -6  14    29.03    26.28     0.66 o
   3  -6  14     4.50     4.86     0.30 o
   4  -6  14     0.13     0.34     0.24 <
   5  -6  14     0.00     0.41     0.32 <
  -7  -5  14     0.25     0.72     0.38 <
  -6  -5  14     0.04     0.13     0.23 <
  -5  -5  14     3.13     3.65     0.16 o
  -4  -5  14     3.04     3.36     0.15 o
  -3  -5  14     2.37     2.52     0.16 o
  -2  -5  14     2.04     2.29     0.16 o
  -1  -5  14    51.85    52.65     0.48 o
   0  -5  14   365.45   367.67     1.80 o
   1  -5  14     6.69     6.92     0.16 o
   2  -5  14     1.68     1.65     0.12 o
   3  -5  14     1.75     1.70     0.23 o
   4  -5  14     5.33     5.40     0.26 o
   5  -5  14     0.01    -0.17     0.28 <
   6  -5  14    18.67    19.25     0.68 o
  -7  -4  14     0.09     0.17     0.30 <
  -6  -4  14     1.73     1.58     0.16 o
  -5  -4  14     0.00    -0.19     0.14 <
  -4  -4  14     1.81     1.81     0.13 o
  -3  -4  14     0.01    -0.01     0.11 <
  -2  -4  14    80.00    80.93     0.64 o
  -1  -4  14    16.72    16.80     0.20 o
   0  -4  14    32.45    31.15     0.27 o
   1  -4  14    17.57    17.59     0.21 o
   2  -4  14     9.68     9.70     0.17 o
   3  -4  14     1.11     1.28     0.11 o
   4  -4  14     0.11     0.06     0.25 <
   5  -4  14     1.66     1.54     0.25 o
   6  -4  14    15.20    15.60     0.62 o
   7  -4  14   150.15   156.98     2.32 o
  -8  -3  14     0.01    -0.07     0.36 <
  -7  -3  14     0.06    -0.01     0.23 <
  -6  -3  14     0.31     0.38     0.13 <
  -5  -3  14    20.74    21.49     0.30 o
  -4  -3  14     0.10     0.04     0.13 <
  -3  -3  14    52.90    53.57     0.46 o
  -2  -3  14     0.75     0.86     0.10 o
  -1  -3  14     3.85     4.25     0.14 o
   0  -3  14     0.00     0.15     0.08 <
   1  -3  14     1.93     1.93     0.09 o
   2  -3  14     0.36     0.37     0.08 o
   3  -3  14     0.92     0.85     0.10 o
   4  -3  14     0.00     0.00     0.10 <
   5  -3  14   176.46   179.84     1.93 o
   6  -3  14   134.82   133.60     1.56 o
   7  -3  14     1.87     1.84     0.42 o
  -8  -2  14     4.51     4.78     0.43 o
  -7  -2  14     0.01     0.28     0.15 <
  -6  -2  14     2.63     2.34     0.14 o
  -5  -2  14     3.29     3.39     0.17 o
  -4  -2  14   438.88   451.61     2.58 o
  -3  -2  14    14.28    14.44     0.19 o
  -2  -2  14    23.75    24.31     0.27 o
  -1  -2  14     3.08     2.97     0.10 o
   0  -2  14    17.67    16.89     0.18 o
   1  -2  14     0.01     0.02     0.07 <
   3  -2  14     0.17     0.04     0.09 <
   4  -2  14   213.16   238.97     1.34 o
   5  -2  14     0.72     0.87     0.13 o
   6  -2  14     3.57     3.32     0.29 o
   7  -2  14     1.63     1.00     0.36 <
   8  -2  14     7.15     7.32     0.51 o
  -8  -1  14     0.89     0.76     0.35 <
  -7  -1  14    19.40    20.19     0.28 o
  -6  -1  14   170.41   171.57     1.12 o
  -5  -1  14    82.25    85.79     0.70 o
  -4  -1  14    39.52    39.66     0.34 o
  -3  -1  14     6.19     6.68     0.15 o
  -2  -1  14     1.57     1.35     0.11 o
  -1  -1  14     0.95     0.90     0.08 o
   0  -1  14     0.17     0.35     0.07 o
   2  -1  14     7.48     6.49     0.11 o
   3  -1  14    50.45    48.16     0.34 o
   4  -1  14    10.84    11.32     0.19 o
   5  -1  14    16.11    15.99     0.24 o
   6  -1  14     0.31     0.28     0.13 <
   7  -1  14     0.98     0.92     0.27 o
   8  -1  14     0.02    -0.03     0.39 <
  -8   0  14     1.85     2.43     0.39 o
  -7   0  14    39.02    39.70     0.38 o
  -6   0  14    98.70    95.94     0.72 o
  -5   0  14     0.41     0.53     0.11 o
  -4   0  14     1.81     2.07     0.12 o
  -3   0  14     1.99     1.89     0.11 o
  -2   0  14    24.25    22.98     0.23 o
  -1   0  14    13.81    12.62     0.15 o
   0   0  14     0.34     0.53     0.06 o
   4   0  14     7.15     7.45     0.14 o
   5   0  14     2.88     2.74     0.16 o
   6   0  14     9.43     9.57     0.20 o
   7   0  14     0.45     0.51     0.13 o
   8   0  14     2.43     2.73     0.41 o
  -8   1  14   324.35   325.08     3.41 o
  -7   1  14     0.63     0.35     0.16 <
  -6   1  14     0.63     0.78     0.13 o
  -5   1  14     3.18     3.31     0.15 o
  -4   1  14     0.45     0.58     0.09 o
  -3   1  14     4.45     4.38     0.12 o
  -2   1  14     0.33     0.33     0.07 o
  -1   1  14     4.14     4.13     0.08 o
   2   1  14    34.26    33.17     0.27 o
   3   1  14     0.44     0.40     0.08 o
   4   1  14     0.17     0.13     0.11 <
   5   1  14     0.66     0.50     0.12 o
   6   1  14     0.02    -0.04     0.12 <
   7   1  14     2.19     2.44     0.14 o
   8   1  14    11.77    13.59     0.25 o
   9   1  14    36.49    35.02     0.89 o
  -8   2  14     5.86     5.49     0.42 o
  -7   2  14     0.00    -0.14     0.22 <
  -6   2  14     0.27     0.23     0.13 <
  -5   2  14     4.02     3.89     0.14 o
  -4   2  14     0.11     0.13     0.09 <
  -3   2  14    76.83    71.46     0.41 o
  -2   2  14     2.43     2.23     0.08 o
  -1   2  14  1067.14   963.85     3.92 o
   0   2  14   160.24   173.46     0.86 o
   1   2  14    23.70    23.09     0.21 o
   2   2  14     0.24     0.24     0.08 <
   3   2  14     1.07     0.92     0.09 o
   4   2  14     8.19     8.02     0.16 o
   5   2  14    39.35    39.85     0.39 o
   6   2  14     1.35     1.31     0.12 o
   7   2  14    24.30    24.57     0.33 o
   8   2  14    90.56    89.28     0.69 o
   9   2  14     0.05    -0.19     0.41 <
  -8   3  14     4.88     5.41     0.34 o
  -7   3  14     2.43     2.57     0.24 o
  -6   3  14     0.11     0.18     0.18 <
  -5   3  14     1.64     1.46     0.11 o
  -4   3  14    47.57    44.68     0.34 o
  -2   3  14    88.56    82.45     0.43 o
  -1   3  14    21.62    19.67     0.17 o
   0   3  14    69.95    66.51     0.48 o
   1   3  14    14.09    13.45     0.18 o
   2   3  14    14.85    13.49     0.18 o
   3   3  14     0.77     0.76     0.08 o
   4   3  14    11.85    12.21     0.19 o
   5   3  14     0.78     0.63     0.12 o
   6   3  14   531.97   538.43     3.23 o
   7   3  14     0.01     0.19     0.12 <
   8   3  14     0.03    -0.02     0.16 <
   9   3  14     0.35     0.35     0.40 <
  -8   4  14     0.03     0.14     0.34 <
  -7   4  14     0.07     0.25     0.20 <
  -6   4  14     1.64     1.61     0.19 o
  -5   4  14     9.46     9.13     0.25 o
  -4   4  14   252.59   253.71     1.23 o
  -3   4  14   406.44   378.55     1.68 o
  -2   4  14    50.18    47.42     0.28 o
  -1   4  14     3.77     3.64     0.09 o
   0   4  14     0.19     0.11     0.08 <
   1   4  14     3.85     4.27     0.14 o
   2   4  14     8.12     7.66     0.13 o
   3   4  14    12.37    11.63     0.16 o
   4   4  14   107.11   108.01     0.70 o
   5   4  14   887.10   903.82     5.28 o
   6   4  14    86.07    85.45     0.63 o
   7   4  14     2.25     2.13     0.14 o
   8   4  14     0.12     0.30     0.19 <
   9   4  14     0.00     0.05     0.41 <
  -8   5  14     4.49     4.29     0.48 o
  -7   5  14     2.30     2.24     0.27 o
  -6   5  14     0.07     0.26     0.18 <
  -5   5  14    91.11    83.73     0.82 o
  -4   5  14   284.14   281.70     1.80 o
  -3   5  14     1.12     1.29     0.10 o
  -2   5  14     0.02     0.05     0.08 <
  -1   5  14     1.96     1.87     0.08 o
   0   5  14    13.64    13.97     0.18 o
   1   5  14    46.62    46.46     0.36 o
   2   5  14     3.43     3.76     0.11 o
   3   5  14   124.81   129.58     0.80 o
   4   5  14    20.42    18.98     0.22 o
   5   5  14     0.44     0.61     0.11 o
   6   5  14    16.05    16.54     0.26 o
   7   5  14     0.02    -0.07     0.13 <
   8   5  14     2.39     2.80     0.35 o
   9   5  14     3.51     4.36     0.64 o
  -7   6  14    19.45    19.68     0.73 o
  -6   6  14    13.37    15.12     0.41 o
  -5   6  14   292.97   291.72     2.53 o
  -4   6  14     0.15     0.34     0.17 <
  -3   6  14     9.70     9.91     0.21 o
  -2   6  14     7.10     7.08     0.14 o
  -1   6  14     2.71     2.54     0.10 o
   0   6  14     6.54     7.01     0.14 o
   1   6  14    26.72    25.99     0.25 o
   2   6  14   136.43   123.18     0.77 o
   3   6  14     3.50     3.80     0.12 o
   4   6  14     0.44     0.56     0.10 o
   5   6  14     1.18     1.11     0.13 o
   6   6  14     5.32     5.04     0.17 o
   7   6  14     0.85     1.08     0.16 o
   8   6  14     0.01     0.39     0.31 <
  -7   7  14   124.25   130.54     2.06 o
  -6   7  14     7.53     6.56     0.51 o
  -5   7  14     1.96     1.51     0.21 o
  -4   7  14     1.22     0.85     0.26 o
  -3   7  14     0.18     0.18     0.19 <
  -2   7  14     0.10    -0.02     0.15 <
  -1   7  14     2.12     2.37     0.10 o
   0   7  14   183.99   189.76     1.04 o
   1   7  14   170.42   167.07     0.98 o
   2   7  14     5.86     5.97     0.14 o
   3   7  14    12.18    11.30     0.20 o
   4   7  14     2.35     2.56     0.13 o
   5   7  14     0.00     0.07     0.12 <
   6   7  14     0.77     0.84     0.13 o
   7   7  14     8.29     8.83     0.45 o
   8   7  14     3.48     3.51     0.37 o
  -6   8  14     9.16     7.72     0.76 o
  -5   8  14     0.16     0.89     0.55 <
  -4   8  14     2.58     2.62     0.31 o
  -3   8  14     1.47     1.35     0.25 o
  -2   8  14     5.82     5.92     0.22 o
  -1   8  14     0.79     1.25     0.18 o
   0   8  14   201.93   203.82     1.16 o
   1   8  14    61.53    61.05     0.52 o
   2   8  14     2.54     2.60     0.13 o
   3   8  14     2.59     2.55     0.13 o
   4   8  14     0.21     0.13     0.12 <
   5   8  14     1.90     1.67     0.13 o
   6   8  14     1.43     1.33     0.17 o
   7   8  14    30.37    32.56     0.78 o
  -5   9  14     1.95     1.95     0.61 o
  -4   9  14     0.00    -0.41     0.53 <
  -3   9  14     2.38     2.21     0.28 o
  -2   9  14   228.72   226.97     2.38 o
  -1   9  14   593.47   595.44     4.76 o
   0   9  14     0.63     0.82     0.21 o
   1   9  14     1.96     1.99     0.15 o
   2   9  14     0.34     0.49     0.12 o
   3   9  14     1.27     1.32     0.13 o
   4   9  14     0.35     0.23     0.16 <
   5   9  14     0.02     0.02     0.14 <
   6   9  14   338.14   344.05     3.41 o
   7   9  14     5.39     4.80     0.34 o
  -4  10  14    13.39    13.13     0.92 o
  -3  10  14    22.94    20.54     0.71 o
  -2  10  14    79.66    76.05     1.08 o
  -1  10  14     0.53     0.36     0.25 <
   0  10  14     4.23     4.29     0.27 o
   1  10  14     0.54     0.57     0.18 o
   2  10  14     0.46     0.49     0.14 o
   3  10  14     3.37     3.53     0.18 o
   4  10  14     3.99     4.22     0.18 o
   5  10  14   117.76   120.06     1.83 o
   6  10  14    16.05    17.12     0.63 o
  -3  11  14    54.18    50.43     1.13 o
  -2  11  14     0.44     0.69     0.39 <
  -1  11  14     2.44     2.91     0.31 o
   0  11  14     0.31     0.50     0.23 <
   1  11  14     1.09     0.87     0.20 o
   2  11  14     0.28     0.17     0.26 <
   3  11  14     0.81     0.52     0.27 <
   4  11  14    13.41    13.01     0.45 o
   5  11  14   238.41   237.29     2.56 o
  -1  12  14     0.46     0.25     0.38 <
   0  12  14     1.72     1.24     0.37 o
   1  12  14     0.09     0.21     0.28 <
   2  12  14    71.92    72.23     0.91 o
   3  12  14     3.63     3.67     0.34 o
  -3  -8  15   105.59   107.52     1.64 o
  -2  -8  15     6.07     5.94     0.41 o
  -1  -8  15     6.73     6.70     0.41 o
   0  -8  15     0.72     0.83     0.30 <
   1  -8  15     2.98     2.77     0.37 o
   2  -8  15     0.61     0.77     0.35 <
  -5  -7  15    31.91    33.26     0.85 o
  -4  -7  15   189.99   190.98     2.57 o
  -3  -7  15     1.34     1.16     0.40 <
  -2  -7  15    22.46    22.08     0.51 o
  -1  -7  15     0.11     0.43     0.14 o
   0  -7  15    16.42    16.37     0.43 o
   1  -7  15     0.20     0.24     0.23 <
   2  -7  15     0.03    -0.12     0.33 <
   3  -7  15     7.80     7.93     0.47 o
   4  -7  15   368.73   364.87     4.43 o
  -6  -6  15    55.21    56.46     1.14 o
  -5  -6  15   201.87   201.95     2.22 o
  -4  -6  15     6.18     6.62     0.31 o
  -3  -6  15     1.78     2.06     0.18 o
  -2  -6  15     0.91     1.28     0.17 o
  -1  -6  15     1.48     1.61     0.15 o
   0  -6  15     1.24     1.28     0.13 o
   1  -6  15     0.49     0.47     0.13 o
   2  -6  15   140.24   140.64     1.97 o
   3  -6  15   402.94   405.88     3.89 o
   4  -6  15     0.14     0.30     0.25 <
   5  -6  15     0.47     0.93     0.54 <
  -6  -5  15     0.02     0.40     0.31 <
  -5  -5  15     0.29     0.57     0.18 o
  -4  -5  15     1.56     1.57     0.16 o
  -3  -5  15     3.72     3.53     0.17 o
  -2  -5  15     0.13     0.15     0.14 <
  -1  -5  15    11.87    12.53     0.21 o
   0  -5  15    21.44    21.69     0.27 o
   1  -5  15   285.67   281.24     1.50 o
   2  -5  15    13.34    12.22     0.21 o
   3  -5  15     7.73     8.16     0.33 o
   4  -5  15     5.82     5.51     0.30 o
   5  -5  15     0.14     0.50     0.27 <
   6  -5  15     4.20     5.12     0.48 o
  -7  -4  15     0.31     0.59     0.32 <
  -6  -4  15    11.46    10.96     0.36 o
  -5  -4  15     0.01    -0.01     0.14 <
  -4  -4  15     0.88     1.19     0.14 o
  -3  -4  15     0.00     0.02     0.12 <
  -2  -4  15    11.62    12.11     0.22 o
  -1  -4  15     0.25     0.40     0.11 o
   0  -4  15   125.84   136.34     0.77 o
   1  -4  15    62.76    63.64     0.48 o
   2  -4  15    44.50    43.71     0.40 o
   3  -4  15     0.32     0.53     0.12 o
   4  -4  15     1.27     1.61     0.25 o
   5  -4  15     0.21     0.48     0.25 <
   6  -4  15     3.24     3.05     0.42 o
  -7  -3  15     0.40     0.64     0.30 <
  -6  -3  15     0.10     0.35     0.15 <
  -5  -3  15    12.53    13.80     0.24 o
  -4  -3  15     0.23     0.27     0.14 <
  -3  -3  15     5.01     5.17     0.19 o
  -2  -3  15     0.00     0.05     0.10 <
  -1  -3  15   524.94   537.80     2.56 o
   0  -3  15     0.01    -0.21     0.08 <
   1  -3  15     1.70     1.85     0.10 o
   2  -3  15     0.03     0.11     0.10 <
   3  -3  15     0.42     0.39     0.11 o
   4  -3  15     0.20     0.52     0.13 o
   5  -3  15     3.40     3.65     0.28 o
   6  -3  15    40.14    37.80     0.92 o
   7  -3  15   597.59   596.34     6.97 o
  -8  -2  15     8.06     8.38     0.51 o
  -7  -2  15     0.77     0.62     0.29 <
  -6  -2  15     0.24     0.08     0.13 <
  -5  -2  15     0.80     0.84     0.14 o
  -4  -2  15     0.16     0.33     0.13 <
  -3  -2  15     8.60     9.21     0.18 o
  -2  -2  15     8.91     9.53     0.19 o
  -1  -2  15     2.84     2.85     0.11 o
   0  -2  15    35.89    33.56     0.28 o
   1  -2  15     0.21     0.30     0.08 o
   3  -2  15     0.24     0.27     0.10 <
   4  -2  15     1.56     1.46     0.12 o
   5  -2  15     0.53     0.57     0.13 o
   6  -2  15     0.03     0.29     0.25 <
   7  -2  15     1.57     1.72     0.40 o
  -8  -1  15     1.01     1.90     0.47 o
  -7  -1  15     2.28     2.37     0.17 o
  -6  -1  15    32.75    33.80     0.36 o
  -5  -1  15     4.83     5.10     0.17 o
  -4  -1  15    32.50    34.55     0.35 o
  -2  -1  15     0.15     0.20     0.10 <
  -1  -1  15     0.67     0.70     0.09 o
   0  -1  15     0.00     0.09     0.08 <
   1  -1  15    10.22     9.28     0.14 o
   2  -1  15     2.15     1.81     0.10 o
   3  -1  15     0.75     0.45     0.08 o
   4  -1  15    33.01    32.95     0.33 o
   5  -1  15   229.26   232.85     1.63 o
   6  -1  15     0.00    -0.09     0.13 <
   7  -1  15     2.48     2.38     0.30 o
   8  -1  15     0.02    -0.43     0.39 <
  -8   0  15     0.08     0.46     0.36 <
  -7   0  15     6.18     6.77     0.19 o
  -6   0  15    29.94    28.98     0.35 o
  -5   0  15   381.22   381.22     2.10 o
  -4   0  15     3.65     4.10     0.15 o
  -3   0  15     4.75     4.68     0.13 o
  -2   0  15    17.52    17.54     0.19 o
  -1   0  15    28.86    26.54     0.23 o
   0   0  15     1.86     1.75     0.08 o
   1   0  15     0.02    -0.04     0.07 <
   3   0  15     0.29     0.24     0.08 <
   4   0  15    14.97    16.04     0.21 o
   5   0  15     1.37     1.67     0.15 o
   6   0  15     7.90     7.48     0.18 o
   7   0  15     1.70     2.08     0.17 o
   8   0  15     2.88     3.28     0.42 o
  -8   1  15     0.41     0.16     0.36 <
  -7   1  15     3.52     3.12     0.19 o
  -6   1  15   744.05   744.46     4.16 o
  -5   1  15     5.19     5.65     0.17 o
  -4   1  15     4.45     3.84     0.13 o
  -3   1  15     3.26     3.23     0.11 o
  -2   1  15     0.80     0.64     0.08 o
  -1   1  15     1.62     1.54     0.08 o
   0   1  15    36.54    33.99     0.25 o
   2   1  15   158.86   141.94     0.77 o
   3   1  15     1.71     1.56     0.10 o
   4   1  15     3.90     4.20     0.14 o
   5   1  15     1.59     1.44     0.14 o
   6   1  15     0.31     0.37     0.12 <
   7   1  15     1.13     1.29     0.14 o
   8   1  15     0.02     0.18     0.19 <
  -8   2  15     8.65     9.08     0.48 o
  -7   2  15     6.37     5.88     0.28 o
  -6   2  15     0.33     0.43     0.14 o
  -5   2  15     3.56     3.58     0.14 o
  -4   2  15     1.81     1.72     0.11 o
  -3   2  15    22.82    21.60     0.22 o
  -2   2  15     4.34     4.09     0.10 o
  -1   2  15     0.28     0.40     0.07 o
   1   2  15   121.85   109.00     0.68 o
   2   2  15     0.38     0.36     0.09 o
   4   2  15     8.85     8.73     0.18 o
   5   2  15    21.73    21.53     0.28 o
   6   2  15     0.43     0.62     0.13 o
   7   2  15     0.67     0.75     0.15 o
   8   2  15    79.19    77.03     0.72 o
  -8   3  15    25.40    25.12     0.56 o
  -7   3  15     0.79     0.91     0.21 o
  -6   3  15     0.04     0.30     0.18 <
  -5   3  15     8.97     8.57     0.18 o
  -4   3  15    10.02     9.35     0.16 o
  -3   3  15     0.24     0.37     0.07 o
  -2   3  15     0.16     0.16     0.07 <
   0   3  15   615.31   573.53     2.82 o
   1   3  15     0.00     0.04     0.08 <
   2   3  15    20.21    18.22     0.22 o
   3   3  15     6.05     6.26     0.14 o
   4   3  15     3.25     3.31     0.13 o
   5   3  15     0.00     0.16     0.12 <
   6   3  15     0.01     0.04     0.12 <
   7   3  15    12.43    12.43     0.26 o
   8   3  15    37.25    38.79     0.73 o
  -8   4  15     1.21     1.04     0.35 <
  -7   4  15     0.24     0.17     0.24 <
  -6   4  15     0.71     0.72     0.19 o
  -5   4  15     0.37     0.45     0.17 <
  -4   4  15    17.36    17.08     0.21 o
  -3   4  15    49.88    45.80     0.32 o
  -2   4  15   508.78   467.88     2.22 o
  -1   4  15     9.33     8.89     0.13 o
   0   4  15     8.97     9.60     0.15 o
   1   4  15     1.99     2.34     0.11 o
   2   4  15     4.43     4.32     0.12 o
   3   4  15     4.64     4.50     0.12 o
   4   4  15     9.00     9.10     0.17 o
   5   4  15    61.12    62.29     0.52 o
   6   4  15   239.64   230.97     1.52 o
   7   4  15     8.14     6.87     0.19 o
   8   4  15     1.64     1.32     0.54 <
  -7   5  15     0.74     0.64     0.31 <
  -6   5  15     1.79     1.73     0.20 o
  -5   5  15     1.74     1.45     0.21 o
  -4   5  15   202.55   200.88     1.59 o
  -2   5  15     0.03    -0.09     0.09 <
  -1   5  15    16.69    16.37     0.18 o
   0   5  15     8.58     8.63     0.14 o
   1   5  15    33.87    33.05     0.34 o
   2   5  15     0.81     0.94     0.10 o
   3   5  15     4.71     4.77     0.13 o
   4   5  15    35.71    34.48     0.33 o
   5   5  15     1.17     0.40     0.12 o
   6   5  15    50.90    52.15     0.50 o
   7   5  15     7.21     7.55     0.21 o
   8   5  15     2.10     2.24     0.34 o
  -7   6  15     2.22     1.21     0.43 <
  -6   6  15     0.03     0.12     0.24 <
  -5   6  15   590.76   594.14     4.79 o
  -4   6  15    59.58    56.68     0.85 o
  -3   6  15    13.85    14.21     0.36 o
  -2   6  15    12.51    12.36     0.19 o
  -1   6  15     0.72     0.63     0.09 o
   0   6  15     1.36     1.24     0.10 o
   1   6  15    10.07     9.78     0.18 o
   2   6  15     0.10     0.14     0.10 <
   3   6  15     5.69     5.79     0.15 o
   4   6  15   494.96   507.17     2.71 o
   5   6  15     2.80     2.90     0.15 o
   6   6  15    26.34    25.74     0.34 o
   7   6  15     0.83     1.11     0.18 o
   8   6  15     0.10     0.24     0.31 <
  -6   7  15    93.64    90.30     1.21 o
  -5   7  15    10.42    10.44     0.34 o
  -4   7  15     8.82     8.80     0.33 o
  -3   7  15     0.16     0.21     0.23 <
  -2   7  15     0.84     1.16     0.21 o
  -1   7  15     1.19     1.38     0.10 o
   0   7  15    49.40    49.46     0.37 o
   1   7  15    13.70    13.43     0.22 o
   2   7  15    22.22    21.90     0.29 o
   3   7  15   137.93   138.42     1.00 o
   4   7  15     1.16     1.44     0.13 o
   5   7  15     0.37     0.62     0.13 o
   6   7  15     0.13     0.44     0.13 o
   7   7  15     1.88     2.32     0.34 o
   8   7  15     2.15     2.68     0.37 o
  -6   8  15    49.55    51.55     1.66 o
  -5   8  15     8.17     6.50     0.70 o
  -4   8  15     2.06     2.35     0.27 o
  -3   8  15     2.90     3.75     0.40 o
  -2   8  15     6.25     6.39     0.31 o
  -1   8  15     3.12     2.91     0.23 o
   0   8  15    57.45    57.41     0.49 o
   1   8  15   704.78   690.09     4.39 o
   2   8  15    12.50    12.68     0.22 o
   3   8  15     0.01    -0.04     0.13 <
   4   8  15     0.07     0.13     0.12 <
   5   8  15     5.73     5.57     0.17 o
   6   8  15     0.48     0.79     0.23 o
   7   8  15     0.51     0.59     0.27 <
  -5   9  15     3.13     3.59     0.69 o
  -4   9  15     0.26     0.43     0.54 <
  -3   9  15     4.84     4.66     0.33 o
  -2   9  15     2.52     2.32     0.28 o
  -1   9  15   291.48   292.23     2.92 o
   0   9  15   339.52   335.56     2.86 o
   1   9  15     9.12     9.28     0.25 o
   2   9  15     1.06     1.12     0.14 o
   3   9  15     4.46     3.90     0.16 o
   4   9  15     0.31     0.45     0.14 o
   5   9  15     1.18     1.37     0.18 o
   6   9  15     7.81     7.98     0.37 o
   7   9  15     0.84     1.39     0.29 o
  -4  10  15     5.18     3.80     0.67 o
  -3  10  15     0.08    -0.21     0.39 <
  -2  10  15   129.90   125.86     1.53 o
  -1  10  15    18.12    17.72     0.49 o
   0  10  15     1.36     1.86     0.25 o
   1  10  15     4.48     4.52     0.28 o
   2  10  15     0.70     0.70     0.14 o
   3  10  15     0.81     0.91     0.16 o
   4  10  15     1.60     1.74     0.18 o
   5  10  15     0.31    -0.16     0.34 <
   6  10  15    25.64    28.25     0.79 o
  -3  11  15    92.56    84.11     1.55 o
  -2  11  15     0.70     0.28     0.40 <
  -1  11  15     2.07     1.77     0.41 o
   0  11  15     3.82     3.55     0.27 o
   1  11  15     0.03     0.13     0.23 <
   2  11  15     1.05     1.21     0.29 o
   3  11  15     0.01     0.18     0.27 <
   4  11  15     3.72     2.74     0.33 o
   0  12  15     3.17     2.91     0.41 o
   1  12  15     0.71     1.06     0.41 <
   2  12  15     3.52     3.36     0.34 o
  -1  -8  16    36.46    36.35     0.83 o
   0  -8  16     0.17     0.47     0.30 <
  -4  -7  16    43.30    46.01     0.98 o
  -3  -7  16    93.66    95.01     2.11 o
  -2  -7  16    91.27    92.12     1.46 o
  -1  -7  16     1.05     1.21     0.25 o
   0  -7  16    10.47    10.56     0.37 o
   1  -7  16     0.02     0.26     0.24 <
   2  -7  16     0.09     0.07     0.33 <
   3  -7  16     0.78     1.15     0.36 o
  -5  -6  16   196.51   203.96     2.25 o
  -4  -6  16   225.68   229.19     2.44 o
  -3  -6  16     3.88     3.82     0.31 o
  -2  -6  16     1.46     1.10     0.18 o
  -1  -6  16     2.75     2.82     0.17 o
   0  -6  16     0.47     0.53     0.13 o
   1  -6  16     4.43     4.19     0.28 o
   2  -6  16     5.28     5.36     0.40 o
   3  -6  16   251.99   246.34     3.13 o
   4  -6  16     8.24     8.45     0.48 o
  -6  -5  16     7.63     7.29     0.50 o
  -5  -5  16     4.69     4.89     0.37 o
  -4  -5  16     0.06     0.33     0.21 <
  -3  -5  16     6.93     6.69     0.23 o
  -2  -5  16     3.36     3.78     0.19 o
  -1  -5  16     4.07     4.94     0.17 o
   0  -5  16    12.41    12.51     0.22 o
   1  -5  16     0.05    -0.01     0.11 <
   2  -5  16     0.38     0.21     0.14 <
   3  -5  16   150.27   151.65     1.68 o
   4  -5  16     2.57     2.63     0.28 o
   5  -5  16     1.53     1.90     0.35 o
  -6  -4  16   117.37   118.57     1.52 o
  -5  -4  16     0.10     0.69     0.21 o
  -4  -4  16     0.57     0.84     0.13 o
  -3  -4  16     0.06     0.05     0.13 <
  -2  -4  16     5.21     5.16     0.19 o
  -1  -4  16     0.00    -0.01     0.11 <
   0  -4  16     2.93     2.81     0.13 o
   1  -4  16   172.41   175.51     1.12 o
   2  -4  16   519.85   520.34     3.15 o
   3  -4  16     1.24     1.06     0.13 o
   4  -4  16     3.48     3.80     0.28 o
   5  -4  16     0.01     0.14     0.25 <
   6  -4  16     1.92     2.09     0.41 o
  -7  -3  16     0.04     0.12     0.36 <
  -6  -3  16     0.03    -0.06     0.24 <
  -5  -3  16     5.42     6.00     0.18 o
  -4  -3  16     0.49     0.66     0.15 o
  -3  -3  16     6.12     6.13     0.20 o
  -2  -3  16     0.02     0.11     0.11 <
  -1  -3  16   109.21   111.82     0.66 o
   0  -3  16     1.26     1.23     0.10 o
   1  -3  16    14.91    15.81     0.19 o
   2  -3  16     0.09     0.06     0.11 <
   3  -3  16     0.02     0.01     0.11 <
   4  -3  16     0.48     0.47     0.13 o
   5  -3  16     0.02     0.08     0.24 <
   6  -3  16     3.09     3.17     0.31 o
   7  -3  16    79.66    78.00     1.44 o
  -7  -2  16     5.45     5.91     0.39 o
  -6  -2  16     0.72     0.50     0.15 o
  -5  -2  16     0.14    -0.06     0.14 <
  -4  -2  16     0.61     0.38     0.14 <
  -3  -2  16     0.03    -0.02     0.11 <
  -2  -2  16    70.05    71.66     0.53 o
  -1  -2  16     9.88    10.85     0.18 o
   0  -2  16    55.77    54.71     0.39 o
   1  -2  16     3.06     3.15     0.11 o
   2  -2  16    10.22     9.15     0.17 o
   3  -2  16     0.52     0.52     0.11 o
   4  -2  16     0.06     0.27     0.12 <
   5  -2  16     0.18     0.30     0.13 <
   6  -2  16    12.32    12.73     0.43 o
   7  -2  16     1.00     1.14     0.43 <
  -8  -1  16     0.30    -0.35     0.47 <
  -7  -1  16     0.50     0.67     0.30 <
  -6  -1  16    10.39    10.92     0.25 o
  -5  -1  16     3.39     3.64     0.18 o
  -4  -1  16     0.82     0.93     0.13 o
  -3  -1  16   136.45   140.19     0.88 o
  -2  -1  16    62.69    63.07     0.43 o
  -1  -1  16     2.96     2.96     0.10 o
   0  -1  16     0.42     0.55     0.09 o
   1  -1  16     3.99     3.73     0.11 o
   2  -1  16     0.65     0.60     0.10 o
   3  -1  16     0.81     0.68     0.10 o
   4  -1  16     0.92     0.71     0.12 o
   5  -1  16   146.99   148.75     1.13 o
   6  -1  16    89.33    89.02     0.72 o
   7  -1  16     2.49     2.32     0.31 o
  -8   0  16     0.18     0.16     0.46 <
  -7   0  16     1.42     1.77     0.24 o
  -6   0  16     2.81     3.01     0.18 o
  -5   0  16    16.16    16.68     0.25 o
  -4   0  16    94.47   100.10     0.72 o
  -3   0  16    64.61    64.05     0.44 o
  -2   0  16    21.39    21.47     0.22 o
  -1   0  16    35.29    32.92     0.28 o
   0   0  16     2.66     2.49     0.09 o
   1   0  16     0.50     0.46     0.08 o
   2   0  16     6.23     5.61     0.12 o
   3   0  16     1.52     2.02     0.11 o
   4   0  16   178.39   185.93     1.17 o
   6   0  16     5.05     5.16     0.18 o
   7   0  16     3.03     2.92     0.17 o
   8   0  16     5.13     6.33     0.50 o
  -8   1  16     0.51     0.80     0.46 <
  -7   1  16     0.14     0.63     0.20 o
  -6   1  16   188.15   188.86     1.17 o
  -5   1  16    96.93    96.27     0.74 o
  -4   1  16    31.26    29.76     0.30 o
  -3   1  16    12.58    12.83     0.18 o
  -2   1  16     1.88     1.68     0.10 o
  -1   1  16     0.03     0.10     0.08 <
   0   1  16     5.89     5.99     0.11 o
   1   1  16     4.81     4.16     0.12 o
   3   1  16   354.12   354.12     1.83 o
   4   1  16    53.26    54.27     0.41 o
   5   1  16     3.83     3.41     0.19 o
   6   1  16     0.56     0.71     0.14 o
   7   1  16     0.34     0.25     0.14 <
   8   1  16     0.02    -0.27     0.29 <
  -8   2  16     0.03    -0.55     0.47 <
  -7   2  16    12.53    12.62     0.41 o
  -6   2  16    22.77    21.82     0.28 o
  -5   2  16     1.16     1.17     0.13 o
  -4   2  16     6.69     6.45     0.17 o
  -3   2  16     6.42     6.39     0.14 o
  -2   2  16     4.31     3.85     0.11 o
   0   2  16     6.07     6.56     0.12 o
   1   2  16    39.77    36.77     0.31 o
   2   2  16   192.06   190.99     1.11 o
   4   2  16    14.19    13.63     0.23 o
   5   2  16    13.20    13.42     0.27 o
   6   2  16     0.10     0.11     0.14 <
   7   2  16     1.84     1.69     0.17 o
   8   2  16     4.09     4.16     0.33 o
  -8   3  16    65.06    64.85     1.05 o
  -7   3  16   161.74   162.87     1.65 o
  -6   3  16     2.30     2.53     0.24 o
  -5   3  16    26.31    24.68     0.29 o
  -4   3  16     3.96     3.83     0.15 o
  -3   3  16     0.69     0.58     0.08 o
  -2   3  16     0.24     0.23     0.08 <
  -1   3  16     2.35     2.12     0.09 o
   0   3  16   766.70   711.96     3.33 o
   1   3  16   265.75   270.75     1.42 o
   2   3  16    19.91    18.81     0.22 o
   3   3  16    26.53    26.00     0.29 o
   4   3  16     0.54     0.67     0.13 o
   5   3  16     1.39     1.15     0.12 o
   6   3  16     0.43     0.35     0.12 <
   7   3  16     0.84     1.11     0.16 o
   8   3  16     2.92     3.13     0.41 o
  -7   4  16     0.04     0.02     0.27 <
  -6   4  16     0.03     0.28     0.19 <
  -5   4  16     0.00     0.10     0.20 <
  -4   4  16     0.22     0.49     0.11 o
  -3   4  16     5.13     4.52     0.12 o
  -2   4  16    25.28    23.05     0.23 o
  -1   4  16   165.39   151.98     0.82 o
   0   4  16   173.68   180.62     1.00 o
   1   4  16    17.72    18.64     0.22 o
   2   4  16     1.97     1.88     0.11 o
   3   4  16     1.35     1.34     0.12 o
   4   4  16     0.68     0.68     0.11 o
   5   4  16    10.58    10.56     0.23 o
   6   4  16     0.96     1.00     0.13 o
   7   4  16    32.33    29.87     0.43 o
   8   4  16   131.07   131.45     2.79 o
  -7   5  16     0.07     0.13     0.31 <
  -6   5  16     5.34     5.15     0.24 o
  -5   5  16     1.28     1.18     0.21 o
  -4   5  16    13.05    13.37     0.36 o
  -2   5  16     0.28     0.32     0.11 <
  -1   5  16    85.42    81.00     0.52 o
   0   5  16    13.79    13.70     0.18 o
   1   5  16    25.02    23.52     0.27 o
   2   5  16     2.08     2.36     0.12 o
   3   5  16     0.13     0.08     0.10 <
   4   5  16     2.65     2.83     0.14 o
   5   5  16     0.38     0.29     0.12 <
   6   5  16   380.39   380.70     2.24 o
   7   5  16    52.75    55.07     1.02 o
   8   5  16     1.81     2.10     0.34 o
  -7   6  16     0.13     0.42     0.40 <
  -6   6  16     0.74     1.10     0.40 <
  -5   6  16     9.40     9.34     0.29 o
  -4   6  16    33.01    32.75     0.49 o
  -3   6  16     2.26     2.87     0.34 o
  -2   6  16    22.47    21.06     0.29 o
  -1   6  16     2.86     3.01     0.12 o
   0   6  16     0.16     0.18     0.10 <
   1   6  16     1.74     1.64     0.11 o
   2   6  16     0.93     0.95     0.13 o
   3   6  16     0.24     0.30     0.12 <
   4   6  16   154.18   154.62     1.03 o
   5   6  16    44.80    46.82     0.45 o
   6   6  16    77.63    79.05     0.60 o
   7   6  16    15.47    14.65     0.53 o
   8   6  16     0.00    -0.41     0.31 <
  -6   7  16     0.29     0.28     0.40 <
  -5   7  16    61.96    59.09     0.79 o
  -4   7  16   104.72   109.06     1.18 o
  -3   7  16     1.51     1.38     0.25 o
  -2   7  16     0.87     1.15     0.29 o
  -1   7  16     1.10     1.12     0.12 o
   0   7  16    21.24    20.94     0.30 o
   1   7  16     9.70     9.74     0.27 o
   2   7  16     2.63     2.69     0.16 o
   3   7  16   174.65   172.46     1.12 o
   4   7  16     2.82     2.05     0.15 o
   5   7  16     0.60     0.52     0.13 o
   6   7  16     2.64     2.13     0.17 o
   7   7  16     0.54     0.47     0.26 <
  -5   8  16   145.68   140.09     3.06 o
  -4   8  16     0.01     0.08     0.28 <
  -3   8  16     3.52     3.09     0.31 o
  -2   8  16     2.05     1.99     0.29 o
  -1   8  16     0.29     0.11     0.23 <
   0   8  16    11.95    11.61     0.19 o
   1   8  16     6.52     6.49     0.23 o
   2   8  16    52.74    53.72     0.56 o
   3   8  16    49.01    48.10     0.48 o
   4   8  16     1.56     1.76     0.16 o
   5   8  16    13.66    13.49     0.25 o
   6   8  16     0.72     0.51     0.25 <
   7   8  16     0.00     0.01     0.26 <
  -5   9  16     3.72     3.85     0.70 o
  -4   9  16     0.73     1.71     0.58 <
  -3   9  16     2.93     2.95     0.41 o
  -2   9  16     1.10     0.81     0.23 o
  -1   9  16    25.25    25.55     0.47 o
   0   9  16    72.14    72.08     0.78 o
   1   9  16     4.56     4.94     0.23 o
   2   9  16     0.08     0.26     0.14 <
   3   9  16     9.22     9.50     0.20 o
   4   9  16     0.74     0.89     0.16 o
   5   9  16     0.32     0.24     0.32 <
   6   9  16     0.93     0.31     0.27 <
  -4  10  16     4.02     3.56     0.66 o
  -3  10  16     0.34     0.97     0.40 <
  -2  10  16     5.94     5.91     0.48 o
  -1  10  16    10.29    10.57     0.41 o
   0  10  16   415.60   405.98     3.43 o
   1  10  16    13.14    12.03     0.38 o
   2  10  16    11.94    12.06     0.28 o
   3  10  16     0.10    -0.05     0.16 <
   4  10  16     2.75     2.75     0.31 o
   5  10  16     3.36     2.86     0.39 o
  -2  11  16    10.78     9.95     0.57 o
  -1  11  16   712.72   670.13     7.73 o
   0  11  16     3.41     3.11     0.41 o
   1  11  16     0.67     0.87     0.30 <
   2  11  16     1.61     1.49     0.30 o
   3  11  16     0.24    -0.09     0.29 <
   4  11  16     5.49     5.57     0.38 o
  -2  -7  17   520.62   531.19     6.12 o
  -1  -7  17     2.29     2.61     0.35 o
   0  -7  17     2.49     1.95     0.32 o
   1  -7  17     0.02     0.52     0.33 <
  -4  -6  17   106.87   108.89     1.40 o
  -3  -6  17   117.18   118.56     2.48 o
  -2  -6  17     2.34     2.07     0.43 o
  -1  -6  17     4.47     4.79     0.29 o
   0  -6  17     0.38     0.46     0.14 o
   1  -6  17     5.81     5.71     0.30 o
   2  -6  17     0.85     0.81     0.34 <
   3  -6  17    20.64    21.62     0.66 o
  -5  -5  17    11.58    12.65     0.48 o
  -4  -5  17    57.79    56.08     1.10 o
  -3  -5  17    10.61    10.39     0.40 o
  -2  -5  17    11.96    12.40     0.25 o
  -1  -5  17     0.54     0.88     0.14 o
   0  -5  17     9.06     9.50     0.20 o
   1  -5  17     1.57     1.45     0.12 o
   2  -5  17     0.00     0.13     0.19 <
   3  -5  17    69.12    70.24     0.98 o
   4  -5  17   265.05   264.84     3.34 o
   5  -5  17     7.87     7.93     0.46 o
  -6  -4  17   192.97   194.52     2.68 o
  -5  -4  17     2.64     2.73     0.27 o
  -4  -4  17     4.20     4.13     0.23 o
  -3  -4  17     0.29     0.23     0.14 <
  -2  -4  17     3.13     3.49     0.19 o
  -1  -4  17     0.07     0.03     0.12 <
   0  -4  17     1.37     1.24     0.13 o
   1  -4  17     0.18     0.17     0.11 <
   2  -4  17   869.79   879.57     4.84 o
   3  -4  17   120.62   121.51     1.06 o
   4  -4  17     6.13     6.60     0.41 o
   5  -4  17     0.31     0.15     0.27 <
  -6  -3  17     0.61     0.99     0.32 o
  -5  -3  17     0.76     1.08     0.21 o
  -4  -3  17     0.63     0.57     0.16 o
  -3  -3  17    10.88    10.57     0.24 o
  -2  -3  17     0.00     0.11     0.11 <
  -1  -3  17    28.11    29.92     0.30 o
   0  -3  17     0.00     0.03     0.10 <
   1  -3  17   475.19   469.46     2.67 o
   2  -3  17     1.80     1.78     0.14 o
   3  -3  17     8.23     9.38     0.21 o
   4  -3  17     0.41     0.28     0.14 <
   5  -3  17     2.84     2.94     0.29 o
   6  -3  17     0.79     0.99     0.29 o
  -7  -2  17    26.20    29.19     0.81 o
  -6  -2  17     5.57     4.48     0.36 o
  -5  -2  17     0.21     0.35     0.16 <
  -4  -2  17     0.31     0.28     0.14 <
  -3  -2  17     0.00    -0.01     0.13 <
  -2  -2  17    12.07    12.08     0.22 o
  -1  -2  17     0.98     1.14     0.11 o
   0  -2  17   134.32   145.28     0.82 o
   1  -2  17    29.01    29.85     0.27 o
   2  -2  17    58.32    57.79     0.46 o
   3  -2  17     1.03     1.11     0.12 o
   4  -2  17     1.83     1.93     0.14 o
   5  -2  17     0.32     0.28     0.14 <
   6  -2  17     2.88     2.94     0.31 o
   7  -2  17     4.16     3.70     0.45 o
  -7  -1  17     0.33     0.35     0.30 <
  -6  -1  17     2.45     2.55     0.23 o
  -5  -1  17     2.28     2.16     0.17 o
  -4  -1  17     3.62     3.70     0.16 o
  -3  -1  17     7.96     7.85     0.18 o
  -2  -1  17    32.67    34.00     0.31 o
  -1  -1  17   258.97   269.29     1.31 o
   0  -1  17     3.13     3.37     0.11 o
   1  -1  17     2.88     2.79     0.11 o
   2  -1  17     0.00    -0.07     0.10 <
   3  -1  17     0.45     0.29     0.12 <
   4  -1  17     3.00     3.05     0.16 o
   5  -1  17     4.12     4.45     0.17 o
   6  -1  17    52.79    52.71     0.54 o
   7  -1  17   644.16   646.92     6.05 o
  -7   0  17     0.11     0.33     0.27 <
  -6   0  17     1.25     1.68     0.19 o
  -5   0  17     3.31     3.20     0.17 o
  -4   0  17     0.16     0.21     0.14 <
  -3   0  17    13.67    14.09     0.23 o
  -2   0  17   146.23   149.32     0.88 o
  -1   0  17    30.71    29.60     0.27 o
   0   0  17     4.04     3.95     0.11 o
   1   0  17     6.61     6.84     0.14 o
   2   0  17     5.69     5.45     0.14 o
   3   0  17     3.37     3.94     0.13 o
   4   0  17     1.29     1.48     0.13 o
   5   0  17    26.30    28.96     0.38 o
   6   0  17     7.43     7.93     0.22 o
   7   0  17     4.24     4.35     0.34 o
  -7   1  17     0.56     0.58     0.34 <
  -6   1  17    35.79    37.31     0.39 o
  -5   1  17     4.56     4.54     0.17 o
  -4   1  17     2.92     2.66     0.13 o
  -3   1  17   133.76   135.49     0.91 o
  -2   1  17     1.09     0.77     0.09 o
  -1   1  17     0.69     0.61     0.09 o
   0   1  17     1.57     1.81     0.09 o
   1   1  17     3.23     3.10     0.12 o
   2   1  17     3.84     3.57     0.13 o
   3   1  17     2.12     2.24     0.11 o
   4   1  17    46.60    48.58     0.39 o
   5   1  17     8.02     9.15     0.24 o
   6   1  17     1.30     1.48     0.15 o
   7   1  17     0.01    -0.25     0.17 <
   8   1  17     0.27     0.37     0.29 <
  -7   2  17     3.38     4.30     0.33 o
  -6   2  17     4.74     4.63     0.18 o
  -5   2  17   484.09   486.54     2.50 o
  -4   2  17    14.23    13.69     0.22 o
  -3   2  17     0.14     0.16     0.10 <
  -2   2  17     1.21     1.04     0.10 o
  -1   2  17    10.93     9.76     0.16 o
   0   2  17     1.04     1.07     0.09 o
   1   2  17     4.03     3.94     0.12 o
   2   2  17    26.33    27.03     0.27 o
   4   2  17    37.37    35.05     0.34 o
   5   2  17    11.66    11.26     0.27 o
   6   2  17     0.44     0.66     0.14 o
   7   2  17     4.13     5.04     0.23 o
   8   2  17     1.50     1.40     0.30 o
  -7   3  17    93.28    92.67     1.11 o
  -6   3  17   169.63   163.66     1.45 o
  -5   3  17    43.47    41.77     0.40 o
  -4   3  17     5.30     5.33     0.16 o
  -3   3  17     0.16     0.25     0.11 <
  -2   3  17     0.08     0.10     0.09 <
  -1   3  17     3.12     2.87     0.11 o
   0   3  17    38.76    37.21     0.29 o
   1   3  17    41.57    39.99     0.33 o
   3   3  17    78.18    77.61     0.59 o
   4   3  17     0.19     0.32     0.14 <
   5   3  17     1.02     1.23     0.18 o
   6   3  17     0.07     0.08     0.14 <
   7   3  17     0.16     0.00     0.34 <
   8   3  17     0.11     0.08     0.24 <
  -7   4  17     1.91     2.14     0.30 o
  -6   4  17     0.10     0.23     0.22 <
  -5   4  17     0.46     0.52     0.20 <
  -4   4  17     1.81     2.15     0.13 o
  -3   4  17     2.23     2.17     0.13 o
  -2   4  17    19.47    18.54     0.25 o
  -1   4  17     1.09     1.25     0.10 o
   0   4  17   111.81   116.90     0.65 o
   1   4  17   477.91   477.79     2.54 o
   2   4  17     0.21     0.31     0.11 <
   3   4  17     0.11     0.15     0.12 <
   4   4  17     0.21     0.08     0.16 <
   5   4  17     8.25     7.88     0.22 o
   6   4  17     0.56     0.64     0.13 o
   7   4  17     1.32     1.50     0.30 o
   8   4  17   103.08   101.83     1.70 o
  -7   5  17     2.27     1.89     0.35 o
  -6   5  17     8.53     8.17     0.35 o
  -5   5  17     3.87     3.64     0.24 o
  -4   5  17     2.32     2.77     0.22 o
  -3   5  17     2.37     2.16     0.14 o
  -2   5  17     2.22     2.01     0.14 o
  -1   5  17   232.23   216.39     1.31 o
   0   5  17    67.84    64.59     0.46 o
   1   5  17     0.58     0.59     0.11 o
   2   5  17     5.64     5.87     0.19 o
   3   5  17     2.30     2.31     0.16 o
   4   5  17     0.09     0.06     0.13 <
   5   5  17     0.00     0.06     0.14 <
   6   5  17     0.70     0.55     0.14 o
   7   5  17     9.93    10.40     0.47 o
   8   5  17     3.77     3.42     0.58 o
  -6   6  17     0.23     0.32     0.57 <
  -5   6  17     0.00     0.09     0.20 <
  -4   6  17     1.65     1.82     0.22 o
  -3   6  17     7.77     8.05     0.36 o
  -2   6  17   445.90   426.27     2.80 o
  -1   6  17    33.02    33.06     0.36 o
   0   6  17     0.39     0.43     0.11 o
   1   6  17     0.00     0.01     0.12 <
   2   6  17     1.46     1.65     0.17 o
   3   6  17     3.21     2.72     0.16 o
   4   6  17    15.22    15.22     0.25 o
   5   6  17     0.27     0.47     0.14 o
   6   6  17   153.53   155.41     1.23 o
   7   6  17   162.29   158.82     1.81 o
  -6   7  17     3.88     3.67     0.68 o
  -5   7  17     0.57     0.41     0.38 <
  -4   7  17    30.76    32.56     0.67 o
  -3   7  17    87.72    83.90     0.97 o
  -2   7  17     2.39     2.21     0.23 o
  -1   7  17     6.98     7.56     0.18 o
   0   7  17     8.57     8.02     0.18 o
   1   7  17     4.13     4.26     0.21 o
   2   7  17     6.12     5.99     0.22 o
   3   7  17     5.45     5.42     0.18 o
   4   7  17     1.34     1.46     0.15 o
   5   7  17    29.83    31.45     0.40 o
   6   7  17    14.40    13.48     0.39 o
   7   7  17     4.18     3.67     0.31 o
  -5   8  17   184.78   179.26     2.52 o
  -4   8  17    52.21    51.61     1.08 o
  -3   8  17     5.61     6.08     0.43 o
  -2   8  17     0.43     0.22     0.27 <
  -1   8  17     0.09    -0.03     0.21 <
   0   8  17     0.69     0.61     0.12 o
   1   8  17     1.17     1.16     0.14 o
   2   8  17     0.02    -0.15     0.14 <
   3   8  17    81.34    79.89     0.69 o
   4   8  17   166.89   169.72     1.22 o
   5   8  17    18.03    18.55     0.34 o
   6   8  17     1.39     1.13     0.27 o
  -4   9  17     0.02    -0.06     0.57 <
  -3   9  17     1.31     1.19     0.31 o
  -2   9  17     0.23    -0.04     0.28 <
  -1   9  17     5.40     5.16     0.34 o
   0   9  17    18.62    17.75     0.49 o
   1   9  17     0.19     0.28     0.16 <
   2   9  17    13.86    13.32     0.26 o
   3   9  17    64.06    67.42     0.57 o
   4   9  17     0.08     0.24     0.17 <
   5   9  17     0.90     0.63     0.35 <
   6   9  17     0.19     0.22     0.35 <
  -3  10  17     0.01    -0.19     0.40 <
  -2  10  17     1.75     1.37     0.40 o
  -1  10  17     2.95     2.51     0.30 o
   0  10  17    40.00    39.73     0.66 o
   1  10  17    39.10    38.08     0.64 o
   2  10  17   110.25   107.01     1.19 o
   3  10  17     0.03     0.17     0.18 <
   4  10  17     2.17     2.40     0.31 o
   5  10  17     3.08     2.94     0.40 o
  -1  11  17   260.87   253.81     3.37 o
   0  11  17     2.24     2.77     0.43 o
   1  11  17     7.90     7.67     0.42 o
   2  11  17     0.02     0.07     0.29 <
   3  11  17     0.45     0.15     0.29 <
  -3  -6  18     5.96     6.03     0.58 o
  -2  -6  18    31.53    33.21     1.09 o
  -1  -6  18    14.98    15.31     0.53 o
   0  -6  18     2.33     2.15     0.26 o
   1  -6  18     5.60     6.03     0.33 o
   2  -6  18     0.11    -0.26     0.33 <
  -4  -5  18    10.02    10.60     0.52 o
  -3  -5  18   729.54   745.53     8.41 o
  -2  -5  18    41.53    43.04     0.90 o
  -1  -5  18     2.80     2.87     0.33 o
   0  -5  18     5.31     5.78     0.18 o
   1  -5  18     4.17     4.48     0.16 o
   2  -5  18     0.09     0.21     0.25 <
   3  -5  18     4.56     5.02     0.32 o
   4  -5  18    21.40    20.13     0.64 o
  -5  -4  18     0.18    -0.08     0.31 <
  -4  -4  18   644.69   654.86     7.48 o
  -3  -4  18     0.36     0.70     0.27 <
  -2  -4  18     1.36     1.35     0.17 o
  -1  -4  18     0.14     0.44     0.13 o
   0  -4  18     0.39     0.27     0.13 <
   1  -4  18     0.14     0.19     0.12 <
   2  -4  18    30.64    32.98     0.38 o
   3  -4  18    56.42    53.82     0.82 o
   4  -4  18    63.21    63.93     1.16 o
   5  -4  18     0.91     1.11     0.34 o
  -6  -3  18     6.31     6.16     0.48 o
  -5  -3  18     3.62     3.26     0.35 o
  -4  -3  18     0.24     0.16     0.18 <
  -3  -3  18    17.85    17.82     0.27 o
  -2  -3  18     0.25     0.36     0.12 o
  -1  -3  18    10.52    11.41     0.22 o
   0  -3  18     0.16     0.22     0.12 <
   1  -3  18     0.99     1.30     0.13 o
   2  -3  18     1.18     1.27     0.14 o
   3  -3  18   375.33   375.14     2.19 o
   4  -3  18     0.26     0.47     0.30 <
   5  -3  18    13.66    13.77     0.53 o
  -6  -2  18    53.96    55.95     0.95 o
  -5  -2  18     4.05     4.47     0.30 o
  -4  -2  18     0.28     0.37     0.15 <
  -3  -2  18     0.04     0.02     0.13 <
  -2  -2  18     5.18     5.50     0.16 o
  -1  -2  18     0.02    -0.06     0.12 <
   0  -2  18     0.91     0.94     0.12 o
   1  -2  18   142.28   147.95     0.88 o
   2  -2  18   686.29   686.10     4.09 o
   3  -2  18     0.00    -0.04     0.13 <
   4  -2  18     4.33     5.08     0.18 o
   5  -2  18     0.06     0.22     0.25 <
   6  -2  18     1.54     2.12     0.30 o
  -7  -1  18     1.69     1.60     0.40 o
  -6  -1  18     0.25     0.28     0.30 <
  -5  -1  18     1.69     2.15     0.18 o
  -4  -1  18     6.49     6.81     0.19 o
  -3  -1  18     2.98     2.97     0.14 o
  -2  -1  18     3.38     3.68     0.15 o
  -1  -1  18    28.81    30.01     0.29 o
   0  -1  18   335.90   334.73     1.76 o
   1  -1  18    13.71    13.97     0.21 o
   2  -1  18     0.28     0.32     0.12 <
   3  -1  18     0.08     0.08     0.12 <
   4  -1  18     4.59     4.95     0.20 o
   5  -1  18     0.17     0.14     0.14 <
   6  -1  18     6.55     6.37     0.36 o
   7  -1  18    65.37    65.54     1.00 o
  -7   0  18     4.65     4.65     0.37 o
  -6   0  18     0.54     1.21     0.42 <
  -5   0  18     0.77     0.87     0.14 o
  -4   0  18     0.03     0.24     0.13 <
  -3   0  18     0.04     0.09     0.12 <
  -2   0  18   103.04   106.58     0.72 o
  -1   0  18     8.22     9.16     0.17 o
   0   0  18     3.48     3.10     0.12 o
   1   0  18    38.39    39.13     0.34 o
   2   0  18     8.14     8.35     0.17 o
   3   0  18     4.81     5.28     0.16 o
   4   0  18     0.02     0.25     0.13 <
   5   0  18     3.83     4.08     0.19 o
   6   0  18    32.96    34.21     0.41 o
   7   0  18   117.49   124.12     1.80 o
  -7   1  18     1.49     1.43     0.45 o
  -6   1  18    14.19    14.96     0.44 o
  -5   1  18     2.34     2.51     0.14 o
  -4   1  18     0.43     0.23     0.13 <
  -3   1  18   279.56   285.86     1.62 o
  -2   1  18    21.72    22.63     0.27 o
  -1   1  18     3.32     3.20     0.13 o
   0   1  18     1.90     2.23     0.11 o
   1   1  18     3.19     2.90     0.12 o
   2   1  18     1.74     1.43     0.11 o
   3   1  18     1.69     1.67     0.12 o
   4   1  18     1.04     1.04     0.14 o
   5   1  18     2.96     2.77     0.18 o
   6   1  18   524.09   535.61     3.26 o
   7   1  18     0.11    -0.01     0.29 <
  -7   2  18     1.00     0.28     0.43 <
  -6   2  18     1.41     1.70     0.17 o
  -5   2  18    13.11    13.01     0.22 o
  -4   2  18     2.01     1.74     0.14 o
  -3   2  18     3.14     3.35     0.13 o
  -2   2  18     3.45     3.44     0.13 o
  -1   2  18    16.26    14.91     0.21 o
   0   2  18     0.86     0.92     0.10 o
   1   2  18     4.07     4.37     0.13 o
   2   2  18    11.08    11.54     0.18 o
   3   2  18     2.30     2.66     0.12 o
   4   2  18    56.07    52.92     0.51 o
   5   2  18    49.06    50.99     0.54 o
   6   2  18     0.85     1.26     0.15 o
   7   2  18     8.65     8.07     0.49 o
  -7   3  18     5.59     6.17     0.42 o
  -6   3  18    33.78    33.49     0.61 o
  -5   3  18   286.91   287.12     1.57 o
  -4   3  18    19.48    19.96     0.28 o
  -3   3  18     3.82     3.90     0.16 o
  -2   3  18     0.00     0.12     0.11 <
  -1   3  18     0.78     0.45     0.12 o
   0   3  18    15.22    14.68     0.19 o
   1   3  18     2.29     2.33     0.11 o
   3   3  18   526.51   527.54     3.00 o
   4   3  18     0.38     0.19     0.17 <
   5   3  18     0.03    -0.06     0.17 <
   6   3  18     0.01     0.10     0.16 <
   7   3  18     0.13     0.25     0.27 <
  -6   4  18     3.62     4.03     0.31 o
  -5   4  18     1.01     1.23     0.22 o
  -4   4  18    12.35    12.62     0.22 o
  -3   4  18     3.41     3.47     0.15 o
  -2   4  18    17.48    16.31     0.24 o
  -1   4  18     0.26     0.39     0.11 o
   0   4  18     5.34     5.01     0.14 o
   1   4  18   136.98   138.60     0.87 o
   2   4  18    31.80    33.77     0.38 o
   3   4  18     2.16     2.46     0.17 o
   4   4  18     5.31     5.15     0.28 o
   5   4  18     9.43     9.37     0.30 o
   6   4  18     1.57     1.72     0.24 o
   7   4  18     0.79     0.23     0.45 <
  -6   5  18     8.68     9.29     0.43 o
  -5   5  18     9.74     8.98     0.36 o
  -4   5  18     4.29     4.76     0.29 o
  -3   5  18     1.99     1.99     0.16 o
  -2   5  18     1.60     1.53     0.13 o
  -1   5  18     0.17     0.16     0.11 <
   0   5  18   115.53   111.62     0.70 o
   1   5  18   353.07   342.98     2.01 o
   2   5  18     3.55     3.90     0.17 o
   3   5  18    14.09    13.29     0.30 o
   4   5  18     0.51     0.89     0.19 o
   5   5  18     0.15     0.48     0.17 <
   6   5  18     0.67     1.00     0.31 o
   7   5  18     0.20     0.32     0.30 <
  -6   6  18     0.01    -0.71     0.57 <
  -5   6  18     0.50     0.81     0.30 <
  -4   6  18     0.02    -0.13     0.28 <
  -3   6  18     5.34     5.57     0.29 o
  -2   6  18     7.98     7.53     0.20 o
  -1   6  18     9.37    10.20     0.19 o
   0   6  18     8.88     9.65     0.20 o
   1   6  18     5.48     5.60     0.19 o
   2   6  18     5.90     5.90     0.20 o
   3   6  18     3.33     3.19     0.20 o
   4   6  18     6.63     5.57     0.23 o
   5   6  18     0.01    -0.02     0.15 <
   6   6  18     0.06     0.29     0.30 <
   7   6  18   230.24   229.08     2.98 o
  -5   7  18     0.41     0.98     0.39 <
  -4   7  18     0.55     0.86     0.37 <
  -3   7  18    16.29    14.88     0.40 o
  -2   7  18    10.94    11.45     0.35 o
  -1   7  18    41.16    39.73     0.37 o
   0   7  18     0.89     0.91     0.12 o
   1   7  18     4.16     3.93     0.18 o
   2   7  18    13.87    13.67     0.30 o
   3   7  18     0.64     0.67     0.16 o
   4   7  18     0.01     0.12     0.15 <
   5   7  18     0.49     0.46     0.17 <
   6   7  18   145.07   138.04     2.03 o
  -5   8  18     2.75     2.62     0.44 o
  -4   8  18    24.38    24.42     0.76 o
  -3   8  18    39.03    36.64     0.87 o
  -2   8  18     0.00    -0.35     0.28 <
  -1   8  18     5.94     6.00     0.29 o
   0   8  18     0.02     0.09     0.13 <
   1   8  18     0.14     0.27     0.13 <
   2   8  18     0.31     0.45     0.16 <
   3   8  18     1.83     1.95     0.19 o
   4   8  18    27.02    27.42     0.41 o
   5   8  18    31.18    31.73     0.68 o
   6   8  18     1.99     2.30     0.37 o
  -4   9  18    10.40     9.59     0.84 o
  -3   9  18     0.07     0.01     0.30 <
  -2   9  18     0.01     0.08     0.29 <
  -1   9  18     0.91     0.38     0.29 <
   0   9  18     6.32     6.49     0.33 o
   1   9  18     0.46     0.55     0.15 o
   2   9  18     0.77     0.79     0.17 o
   3   9  18    57.27    58.60     0.63 o
   4   9  18     7.21     5.88     0.45 o
   5   9  18     2.62     2.59     0.39 o
  -2  10  18     0.15     0.46     0.39 <
  -1  10  18     0.26     0.57     0.29 <
   0  10  18     3.80     3.12     0.29 o
   1  10  18     0.41     0.17     0.26 <
   2  10  18   220.14   213.42     2.37 o
   3  10  18     6.91     7.57     0.41 o
   4  10  18     3.07     2.76     0.33 o
   0  11  18     0.23     0.65     0.40 <
   1  11  18    47.80    45.33     0.86 o
   2  11  18     1.65     1.36     0.33 o
  -1  -6  19    30.40    31.36     0.75 o
   0  -6  19    57.81    57.28     1.04 o
  -3  -5  19    26.81    27.09     0.74 o
  -2  -5  19   127.26   128.85     1.88 o
  -1  -5  19    97.21    97.30     2.08 o
   0  -5  19     0.87     0.93     0.24 o
   1  -5  19     7.92     8.14     0.29 o
   2  -5  19     0.60     0.58     0.26 <
   3  -5  19     1.27     1.41     0.27 o
  -4  -4  19   171.67   176.45     2.45 o
  -3  -4  19     1.27     1.36     0.39 o
  -2  -4  19     0.10     0.00     0.31 <
  -1  -4  19     0.11     0.26     0.25 <
   0  -4  19     0.02     0.10     0.13 <
   1  -4  19     0.38     0.52     0.14 o
   2  -4  19     3.06     3.25     0.22 o
   3  -4  19     4.01     4.45     0.30 o
   4  -4  19    14.77    13.97     0.56 o
  -5  -3  19     9.52    10.38     0.47 o
  -4  -3  19    41.83    41.79     0.74 o
  -3  -3  19    25.90    25.17     0.42 o
  -2  -3  19     2.69     2.78     0.15 o
  -1  -3  19     1.54     2.01     0.15 o
   0  -3  19     0.55     0.66     0.13 o
   1  -3  19     1.24     1.29     0.14 o
   2  -3  19     0.24     0.09     0.13 <
   3  -3  19    88.02    88.30     0.79 o
   4  -3  19     0.86     1.16     0.33 o
   5  -3  19    49.41    51.19     1.03 o
  -6  -2  19    59.46    58.73     1.18 o
  -5  -2  19   200.45   203.29     2.28 o
  -4  -2  19     2.63     2.75     0.26 o
  -3  -2  19     1.29     1.22     0.13 o
  -2  -2  19     2.91     2.71     0.14 o
  -1  -2  19     0.33     0.37     0.12 <
   0  -2  19     0.42     0.35     0.13 <
   1  -2  19     0.02     0.08     0.14 <
   2  -2  19   804.83   822.53     4.86 o
   3  -2  19    97.07    99.85     0.75 o
   4  -2  19     6.29     6.71     0.20 o
   5  -2  19     0.24     0.59     0.32 <
  -6  -1  19     0.30    -0.20     0.37 <
  -5  -1  19     1.28     1.55     0.42 o
  -4  -1  19     6.27     6.41     0.20 o
  -3  -1  19     2.00     1.98     0.14 o
  -2  -1  19     0.00    -0.08     0.11 <
  -1  -1  19     5.90     6.51     0.18 o
   0  -1  19     8.22     8.38     0.19 o
   1  -1  19   321.30   317.77     2.03 o
   2  -1  19     3.24     2.89     0.17 o
   3  -1  19     3.52     3.71     0.17 o
   4  -1  19     7.25     7.14     0.21 o
   5  -1  19     0.79     0.94     0.18 o
   6  -1  19     2.13     1.97     0.34 o
  -6   0  19     0.01     0.63     0.35 <
  -5   0  19     0.85     0.98     0.22 o
  -4   0  19     0.53     0.72     0.13 o
  -3   0  19     0.07     0.07     0.12 <
  -2   0  19    10.80    11.00     0.21 o
  -1   0  19     0.12     0.25     0.12 <
   0   0  19     9.65     9.41     0.19 o
   1   0  19   243.05   246.23     1.62 o
   2   0  19    19.14    18.36     0.27 o
   3   0  19     5.06     5.87     0.18 o
   4   0  19     0.00     0.01     0.14 <
   5   0  19     1.71     1.62     0.17 o
   6   0  19     3.45     3.58     0.31 o
  -6   1  19     6.82     6.89     0.43 o
  -5   1  19     1.79     1.91     0.15 o
  -4   1  19     0.98     1.11     0.14 o
  -3   1  19    11.25    11.96     0.22 o
  -2   1  19     5.21     5.69     0.16 o
   0   1  19     6.48     7.41     0.18 o
   1   1  19     1.58     1.44     0.12 o
   2   1  19     0.35     0.17     0.11 <
   3   1  19     1.31     1.28     0.14 o
   4   1  19     4.00     4.18     0.18 o
   5   1  19     0.06    -0.05     0.16 <
   6   1  19   174.07   173.55     2.39 o
   7   1  19   133.68   138.53     1.67 o
  -6   2  19     1.77     2.20     0.30 o
  -5   2  19     3.67     4.07     0.17 o
  -4   2  19     0.05     0.07     0.13 <
  -3   2  19     4.50     4.32     0.15 o
  -2   2  19   262.07   263.30     1.43 o
  -1   2  19    21.62    19.97     0.27 o
   0   2  19     6.98     7.13     0.19 o
   1   2  19     8.68     8.86     0.17 o
   2   2  19     9.37    10.04     0.19 o
   3   2  19     3.32     3.71     0.15 o
   4   2  19     0.60     0.68     0.13 o
   5   2  19   130.37   131.27     0.99 o
   6   2  19    63.76    64.08     1.19 o
   7   2  19    13.42    12.97     0.46 o
  -6   3  19     6.20     6.85     0.35 o
  -5   3  19     6.08     5.74     0.19 o
  -4   3  19   276.61   276.49     1.69 o
  -3   3  19   126.44   128.05     0.90 o
  -2   3  19     0.74     0.54     0.12 o
  -1   3  19     0.01     0.08     0.12 <
   0   3  19     7.28     7.57     0.18 o
   1   3  19     0.35     0.46     0.11 o
   2   3  19     0.33     0.43     0.11 o
   3   3  19     3.94     3.87     0.17 o
   4   3  19    45.11    43.11     0.50 o
   5   3  19    85.85    87.30     0.80 o
   6   3  19     3.02     2.83     0.31 o
   7   3  19     2.47     2.62     0.32 o
  -6   4  19     1.27     1.35     0.32 o
  -5   4  19   294.52   294.12     2.64 o
  -4   4  19    36.17    37.44     0.38 o
  -3   4  19     8.15     7.99     0.22 o
  -2   4  19    13.11    12.44     0.24 o
  -1   4  19     0.67     0.86     0.13 o
   0   4  19     0.72     0.63     0.11 o
   1   4  19    19.18    19.38     0.23 o
   2   4  19    13.85    14.91     0.25 o
   3   4  19     3.85     3.81     0.19 o
   4   4  19    21.09    20.16     0.41 o
   5   4  19    18.73    18.67     0.40 o
   6   4  19     1.21     0.65     0.48 <
   7   4  19     0.63     1.12     0.39 <
  -6   5  19     7.35     8.30     0.42 o
  -5   5  19    15.33    13.96     0.42 o
  -4   5  19    26.36    26.21     0.53 o
  -3   5  19     0.94     0.63     0.15 o
  -2   5  19     0.00     0.06     0.13 <
  -1   5  19     0.04     0.06     0.13 <
   0   5  19    11.77    10.64     0.20 o
   1   5  19    33.57    30.15     0.33 o
   2   5  19   440.68   448.64     2.77 o
   3   5  19    46.71    45.28     0.56 o
   4   5  19    10.57    10.82     0.32 o
   5   5  19     0.01     0.32     0.23 <
   6   5  19     0.08    -0.55     0.48 <
   7   5  19     0.96     1.11     0.50 <
  -5   6  19     0.18    -0.01     0.31 <
  -4   6  19     0.04     0.11     0.29 <
  -3   6  19     1.88     2.09     0.26 o
  -2   6  19     3.92     3.82     0.17 o
  -1   6  19     0.12     0.26     0.12 <
   0   6  19     0.39     0.53     0.12 o
   1   6  19   551.85   551.24     3.13 o
   2   6  19     3.82     3.39     0.20 o
   3   6  19     2.33     2.37     0.22 o
   4   6  19     3.90     3.14     0.24 o
   5   6  19     0.01     0.13     0.31 <
   6   6  19     0.02    -0.45     0.33 <
  -5   7  19     0.00     0.27     0.40 <
  -4   7  19     0.20     0.26     0.37 <
  -3   7  19     3.11     3.22     0.28 o
  -2   7  19     1.93     1.66     0.25 o
  -1   7  19   135.77   131.30     0.85 o
   0   7  19     9.47     9.35     0.19 o
   1   7  19     0.28     0.58     0.14 o
   2   7  19    34.42    33.97     0.44 o
   3   7  19     0.40     0.54     0.19 <
   4   7  19     0.19     0.17     0.20 <
   5   7  19     0.14     0.47     0.33 <
   6   7  19     0.07    -0.28     0.34 <
  -4   8  19     2.70     3.13     0.44 o
  -3   8  19    14.31    13.95     0.49 o
  -2   8  19    81.99    78.84     1.13 o
  -1   8  19    44.03    42.53     0.65 o
   0   8  19     1.26     1.39     0.16 o
   1   8  19     0.00     0.22     0.14 <
   2   8  19     0.02    -0.12     0.15 <
   3   8  19     0.01    -0.02     0.21 <
   4   8  19     2.71     2.70     0.32 o
   5   8  19     1.82     1.82     0.38 o
  -3   9  19   129.20   126.02     1.60 o
  -2   9  19     0.57     0.30     0.31 <
  -1   9  19     1.31     1.23     0.30 o
   0   9  19     4.02     4.10     0.31 o
   1   9  19     1.87     2.13     0.17 o
   2   9  19     3.40     3.40     0.21 o
   3   9  19     1.35     1.39     0.31 o
   4   9  19     0.11     0.19     0.29 <
   5   9  19    77.23    74.39     1.38 o
  -1  10  19     0.74     0.55     0.31 <
   0  10  19     0.11     0.39     0.30 <
   1  10  19     0.86     0.45     0.27 <
   2  10  19     0.10    -0.04     0.31 <
   3  10  19    15.14    14.53     0.65 o
  -2  -5  20     0.00     0.12     0.39 <
  -1  -5  20   120.93   121.86     2.48 o
   0  -5  20    22.82    23.10     0.52 o
   1  -5  20    13.50    13.93     0.36 o
  -3  -4  20     0.00    -0.04     0.34 <
  -2  -4  20    13.68    14.42     0.56 o
  -1  -4  20     0.14     1.25     0.54 <
   0  -4  20     3.51     3.59     0.30 o
   1  -4  20     0.26     0.35     0.24 <
   2  -4  20     0.03    -0.09     0.25 <
   3  -4  20     0.69     1.17     0.34 o
  -4  -3  20     5.82     6.03     0.47 o
  -3  -3  20   798.74   822.87     9.26 o
  -2  -3  20    20.57    21.20     0.51 o
  -1  -3  20     3.79     3.83     0.27 o
   0  -3  20     1.12     1.45     0.22 o
   1  -3  20     5.74     6.56     0.26 o
   2  -3  20     0.41     0.36     0.17 <
   3  -3  20     6.52     7.01     0.43 o
   4  -3  20     0.33     0.55     0.33 <
  -5  -2  20   142.54   145.34     2.16 o
  -4  -2  20   374.61   381.67     4.70 o
  -3  -2  20     5.11     5.52     0.28 o
  -2  -2  20     2.28     2.61     0.20 o
  -1  -2  20     1.40     1.22     0.14 o
   0  -2  20     0.15     0.41     0.13 o
   1  -2  20     1.71     2.02     0.15 o
   2  -2  20    35.24    38.16     0.38 o
   3  -2  20    31.23    31.71     0.47 o
   4  -2  20    75.53    74.43     1.04 o
   5  -2  20     3.38     3.79     0.40 o
  -5  -1  20    11.57    12.20     0.65 o
  -4  -1  20     2.28     2.57     0.31 o
  -3  -1  20     2.11     2.08     0.17 o
  -2  -1  20     3.87     3.82     0.15 o
  -1  -1  20     1.77     2.04     0.14 o
   0  -1  20    10.46    10.65     0.21 o
   1  -1  20     1.00     1.07     0.14 o
   2  -1  20     0.32     0.41     0.14 <
   3  -1  20   234.16   236.65     1.49 o
   4  -1  20     6.61     5.88     0.25 o
   5  -1  20     5.53     5.55     0.41 o
  -6   0  20     7.62     8.17     0.57 o
  -5   0  20     8.66     9.33     0.47 o
  -4   0  20     2.23     2.53     0.20 o
  -3   0  20     0.35     0.53     0.13 o
  -2   0  20     2.12     2.59     0.15 o
  -1   0  20     0.49     0.29     0.13 <
   0   0  20     3.45     3.34     0.15 o
   1   0  20   644.47   663.60     3.73 o
   2   0  20   121.87   117.76     0.85 o
   3   0  20     0.09     0.00     0.13 <
   4   0  20     0.33     0.24     0.15 <
   5   0  20     0.21     0.64     0.42 <
   6   0  20     0.43     0.76     0.28 <
  -6   1  20     4.67     4.63     0.51 o
  -5   1  20     0.34     0.48     0.24 <
  -4   1  20     1.98     1.98     0.16 o
  -3   1  20     0.51     0.78     0.13 o
  -2   1  20     0.23     0.51     0.12 o
  -1   1  20     3.64     3.42     0.15 o
   0   1  20   671.72   681.97     3.82 o
   1   1  20     2.91     2.69     0.16 o
   2   1  20     0.09     0.07     0.13 <
   3   1  20     0.42     0.60     0.14 o
   4   1  20     7.19     6.83     0.22 o
   5   1  20     0.11    -0.04     0.41 <
   6   1  20    20.19    19.28     0.64 o
  -6   2  20     0.48     0.75     0.33 <
  -5   2  20     2.89     3.25     0.31 o
  -4   2  20     0.14     0.19     0.14 <
  -3   2  20     0.05    -0.09     0.12 <
  -2   2  20    58.39    60.05     0.50 o
  -1   2  20   105.37   106.06     0.78 o
   0   2  20    31.35    31.14     0.33 o
   1   2  20    29.88    29.18     0.32 o
   2   2  20     5.93     6.05     0.17 o
   3   2  20     2.19     2.61     0.15 o
   4   2  20     0.58     0.67     0.14 o
   5   2  20     7.70     6.49     0.29 o
   6   2  20    44.49    46.07     0.99 o
  -6   3  20     3.91     4.21     0.47 o
  -5   3  20     3.12     3.43     0.27 o
  -4   3  20     0.53     0.50     0.14 o
  -3   3  20   118.53   123.88     0.89 o
  -2   3  20    43.18    41.99     0.42 o
  -1   3  20     0.83     1.08     0.14 o
   0   3  20     3.88     3.95     0.14 o
   1   3  20     0.01    -0.07     0.11 <
   2   3  20     0.02    -0.01     0.12 <
   3   3  20     3.68     3.34     0.17 o
   4   3  20     1.37     1.29     0.17 o
   5   3  20   141.64   142.42     1.16 o
   6   3  20   360.94   371.36     3.68 o
  -5   4  20     4.87     5.66     0.34 o
  -4   4  20    37.24    37.31     0.42 o
  -3   4  20    52.92    53.00     0.53 o
  -2   4  20     2.27     2.40     0.16 o
  -1   4  20     1.05     1.40     0.15 o
   0   4  20     0.95     0.97     0.12 o
   1   4  20    11.39    11.32     0.21 o
   2   4  20     7.81     7.78     0.21 o
   3   4  20     0.23     0.35     0.14 <
   4   4  20     2.28     2.38     0.18 o
   5   4  20   184.03   176.77     3.48 o
   6   4  20     0.83     0.58     0.34 <
  -5   5  20    41.05    38.87     0.67 o
  -4   5  20   155.20   151.85     1.55 o
  -3   5  20     0.97     1.15     0.16 o
  -2   5  20     0.51     0.63     0.15 o
  -1   5  20     0.19     0.31     0.14 <
   0   5  20     8.61     8.44     0.20 o
   1   5  20     2.26     1.98     0.14 o
   2   5  20    25.01    26.36     0.38 o
   3   5  20    63.80    61.53     0.69 o
   4   5  20   136.85   137.71     1.38 o
   5   5  20     0.76     0.82     0.50 <
   6   5  20     0.94     1.25     0.51 <
  -5   6  20     0.01     0.18     0.33 <
  -4   6  20     3.67     3.67     0.45 o
  -3   6  20     0.04    -0.05     0.29 <
  -2   6  20     3.18     2.71     0.16 o
  -1   6  20     0.98     1.28     0.13 o
   0   6  20     0.00    -0.12     0.12 <
   1   6  20   142.70   146.29     1.00 o
   2   6  20    40.16    40.17     0.49 o
   3   6  20     0.37     0.83     0.18 o
   4   6  20     0.27     0.26     0.25 <
   5   6  20     0.50     1.44     0.57 <
   6   6  20     0.13     0.28     0.53 <
  -4   7  20     1.43     1.27     0.41 o
  -3   7  20     0.34     0.23     0.24 <
  -2   7  20     1.04     0.94     0.25 o
  -1   7  20     2.00     1.97     0.16 o
   0   7  20     2.03     2.58     0.14 o
   1   7  20    24.53    22.80     0.34 o
   2   7  20    38.12    37.86     0.48 o
   3   7  20     2.25     2.44     0.23 o
   4   7  20     0.18     0.17     0.53 <
   5   7  20     0.80     0.94     0.57 <
  -3   8  20     5.61     6.01     0.40 o
  -2   8  20     0.08     0.52     0.30 <
  -1   8  20    27.44    26.52     0.52 o
   0   8  20    67.88    70.46     0.64 o
   1   8  20     1.04     1.08     0.15 o
   2   8  20     5.45     5.23     0.23 o
   3   8  20     0.28     0.05     0.36 <
   4   8  20     3.09     2.92     0.63 o
   5   8  20     0.35     0.42     0.36 <
  -2   9  20     2.43     1.98     0.34 o
  -1   9  20     5.37     5.71     0.38 o
   0   9  20     0.15     0.28     0.30 <
   1   9  20     1.94     2.14     0.20 o
   2   9  20     4.83     4.57     0.31 o
   3   9  20     0.34     0.22     0.30 <
   4   9  20     0.02     0.15     0.30 <
   0  10  20     0.04     0.42     0.31 <
   1  10  20     0.07    -0.03     0.27 <
   2  10  20     0.09    -0.06     0.28 <
  -2  -4  21     0.08    -0.32     0.40 <
  -1  -4  21     0.01     0.08     0.32 <
   0  -4  21   117.82   115.24     1.70 o
   1  -4  21     0.19     0.49     0.26 <
  -3  -3  21    15.50    16.03     0.64 o
  -2  -3  21    84.76    89.23     1.49 o
  -1  -3  21   138.61   142.58     2.05 o
   0  -3  21     0.49     0.76     0.27 <
   1  -3  21    11.24    12.54     0.42 o
   2  -3  21     0.10     0.29     0.25 <
   3  -3  21     2.14     2.66     0.36 o
  -3  -2  21    97.12   100.89     1.68 o
  -2  -2  21     2.56     2.79     0.25 o
  -1  -2  21     3.27     2.91     0.30 o
   0  -2  21     0.01     0.03     0.20 <
   1  -2  21     2.91     3.24     0.23 o
   2  -2  21     5.84     6.28     0.34 o
   3  -2  21     6.08     6.77     0.35 o
   4  -2  21    16.80    16.90     0.60 o
  -5  -1  21    20.85    21.81     1.14 o
  -4  -1  21   211.25   222.61     3.04 o
  -3  -1  21     1.80     1.59     0.25 o
  -2  -1  21    27.67    27.15     0.47 o
  -1  -1  21     0.27     0.63     0.21 o
   0  -1  21    13.57    14.06     0.24 o
   1  -1  21     0.30     0.47     0.14 o
   2  -1  21     0.74     0.78     0.19 o
   3  -1  21    25.87    27.05     0.58 o
   4  -1  21   235.73   242.90     2.54 o
   5  -1  21    23.54    23.49     0.69 o
  -5   0  21   360.27   369.49     6.60 o
  -4   0  21     4.34     4.64     0.42 o
  -3   0  21     2.23     2.48     0.21 o
  -2   0  21     0.75     0.81     0.14 o
  -1   0  21     1.41     1.73     0.14 o
   0   0  21     3.16     3.19     0.17 o
   1   0  21     1.77     2.46     0.16 o
   2   0  21   113.07   112.08     0.83 o
   3   0  21   524.50   534.84     3.89 o
   4   0  21     0.58     0.75     0.33 <
   5   0  21     0.31     0.66     0.33 <
  -5   1  21     0.15     0.31     0.32 <
  -4   1  21     2.59     3.18     0.34 o
  -3   1  21     0.86     0.71     0.18 o
  -2   1  21     0.53     0.63     0.15 o
  -1   1  21     3.88     3.74     0.16 o
   0   1  21     7.85     7.62     0.21 o
   1   1  21    57.76    56.66     0.52 o
   2   1  21     5.06     5.32     0.18 o
   3   1  21     1.49     1.36     0.15 o
   4   1  21    14.69    13.77     0.75 o
   5   1  21     0.38     0.67     0.44 <
  -5   2  21     3.74     3.99     0.33 o
  -4   2  21     0.99     1.23     0.32 o
  -3   2  21     0.43     0.36     0.15 <
  -2   2  21     3.58     4.28     0.18 o
  -1   2  21    22.56    22.33     0.31 o
   0   2  21   235.70   242.09     1.52 o
   1   2  21   157.15   155.45     1.00 o
   2   2  21     0.17     0.23     0.13 <
   3   2  21     1.10     1.11     0.15 o
   4   2  21     2.23     1.98     0.22 o
   5   2  21     1.50     2.64     0.51 o
   6   2  21     3.33     4.35     0.42 o
  -5   3  21     3.54     3.88     0.33 o
  -4   3  21     0.18     0.52     0.23 <
  -3   3  21     4.05     4.58     0.19 o
  -2   3  21    30.10    30.45     0.39 o
  -1   3  21    77.00    79.44     0.69 o
   0   3  21     4.90     5.03     0.18 o
   1   3  21     0.07     0.04     0.12 <
   2   3  21     0.44     0.28     0.14 <
   3   3  21     3.55     3.39     0.18 o
   4   3  21     0.64     0.46     0.18 <
   5   3  21     5.55     5.64     0.42 o
   6   3  21    76.10    80.03     1.40 o
  -5   4  21     2.45     2.37     0.36 o
  -4   4  21     0.31     0.30     0.21 <
  -3   4  21    42.58    43.96     0.49 o
  -2   4  21    44.73    45.06     0.49 o
  -1   4  21     0.10     0.24     0.15 <
   0   4  21     7.31     7.18     0.18 o
   1   4  21     6.12     6.06     0.18 o
   2   4  21     4.18     4.06     0.18 o
   3   4  21     0.07    -0.01     0.15 <
   4   4  21     0.17     0.48     0.33 <
   5   4  21   192.88   193.32     2.64 o
   6   4  21    46.15    47.57     0.84 o
  -5   5  21     0.00     0.20     0.33 <
  -4   5  21   479.57   482.39     4.05 o
  -3   5  21     0.48     0.57     0.17 o
  -2   5  21     0.02    -0.10     0.16 <
  -1   5  21     1.16     1.08     0.15 o
   0   5  21     6.21     6.20     0.19 o
   1   5  21     3.08     3.00     0.15 o
   2   5  21     5.02     4.95     0.18 o
   3   5  21     0.06    -0.04     0.18 <
   4   5  21   370.60   370.76     6.50 o
   5   5  21    81.19    86.64     2.17 o
  -4   6  21    18.34    17.92     0.56 o
  -3   6  21     6.72     6.49     0.40 o
  -2   6  21     4.18     3.89     0.19 o
  -1   6  21     4.88     5.18     0.19 o
   0   6  21     0.02    -0.10     0.13 <
   1   6  21    20.00    19.91     0.27 o
   2   6  21     0.16     0.38     0.16 <
   3   6  21    19.10    18.62     0.42 o
   4   6  21     0.06     0.29     0.56 <
   5   6  21     7.66     7.92     0.76 o
  -3   7  21     0.06     0.27     0.26 <
  -2   7  21     0.09     0.16     0.25 <
  -1   7  21     1.10     1.30     0.19 o
   0   7  21     0.94     1.03     0.13 o
   1   7  21     0.18     0.40     0.14 <
   2   7  21   471.36   461.68     3.42 o
   3   7  21    11.48    12.00     0.57 o
   4   7  21     9.40     9.37     0.81 o
   5   7  21     2.09     1.46     0.61 <
  -2   8  21     0.20     0.61     0.32 <
  -1   8  21     0.03     0.09     0.25 <
   0   8  21    65.80    67.48     0.63 o
   1   8  21   175.80   171.78     1.54 o
   2   8  21     9.12     9.12     0.37 o
   3   8  21     4.53     3.49     0.44 o
   4   8  21     4.35     4.66     0.71 o
  -1   9  21    43.91    42.69     0.82 o
   0   9  21    11.34    11.45     0.47 o
   1   9  21     1.14     1.41     0.25 o
   2   9  21    13.99    13.92     0.42 o
   3   9  21     2.11     2.48     0.35 o
  -1  -3  22   120.86   123.59     1.86 o
   0  -3  22    13.71    14.83     0.46 o
   1  -3  22    17.57    18.14     0.48 o
  -3  -2  22     1.92     2.60     0.59 o
  -2  -2  22    20.89    23.05     0.58 o
  -1  -2  22    14.51    14.52     0.47 o
   0  -2  22     1.83     2.01     0.25 o
   1  -2  22     4.16     4.63     0.33 o
   2  -2  22     0.45     0.59     0.27 <
   3  -2  22     2.89     3.46     0.32 o
  -4  -1  22    20.76    22.14     1.07 o
  -3  -1  22   153.43   159.43     2.34 o
  -2  -1  22   163.35   163.82     1.89 o
  -1  -1  22     0.00     0.04     0.28 <
   0  -1  22    14.48    14.70     0.46 o
   1  -1  22     0.81     1.02     0.27 o
   2  -1  22     0.62     0.59     0.28 <
   3  -1  22     2.82     3.12     0.27 o
   4  -1  22    13.94    13.48     0.56 o
  -4   0  22     7.90    10.27     0.54 o
  -3   0  22     7.51     7.71     0.40 o
  -2   0  22     2.94     2.93     0.33 o
  -1   0  22     2.96     3.52     0.33 o
   0   0  22     1.55     1.54     0.21 o
   1   0  22     0.82     0.66     0.21 o
   2   0  22     6.40     6.65     0.35 o
   3   0  22   138.11   138.74     1.63 o
   4   0  22     3.22     3.19     0.39 o
  -4   1  22     0.96     0.93     0.37 <
  -3   1  22     4.99     5.68     0.36 o
  -2   1  22     3.61     3.60     0.33 o
  -1   1  22     3.17     3.27     0.21 o
   0   1  22     9.53     9.80     0.28 o
   1   1  22     0.02     0.32     0.18 <
   2   1  22     2.19     2.23     0.20 o
   3   1  22    19.52    21.49     0.66 o
   4   1  22    16.89    16.62     0.83 o
   5   1  22     1.68     1.93     0.49 o
  -4   2  22     3.70     3.94     0.36 o
  -3   2  22     0.43     0.60     0.31 <
  -2   2  22     0.39     0.73     0.21 o
  -1   2  22     7.78     7.86     0.25 o
   0   2  22     7.94     7.48     0.23 o
   1   2  22   314.49   318.04     2.07 o
   2   2  22    67.36    71.00     0.66 o
   3   2  22     0.73     0.19     0.33 <
   4   2  22    10.50     9.80     0.68 o
   5   2  22     0.36     0.66     0.46 <
  -4   3  22     0.65     0.79     0.33 <
  -3   3  22     0.00    -0.35     0.31 <
  -2   3  22     6.79     7.40     0.28 o
  -1   3  22    26.51    26.58     0.34 o
   0   3  22   413.20   416.65     2.45 o
   1   3  22     1.43     1.43     0.16 o
   2   3  22     0.02     0.07     0.17 <
   3   3  22     2.28     2.37     0.36 o
   4   3  22     0.82     1.01     0.34 <
   5   3  22     0.11    -0.05     0.46 <
  -4   4  22     1.10     0.84     0.29 <
  -3   4  22     0.35     0.16     0.30 <
  -2   4  22     0.06     0.04     0.22 <
  -1   4  22   526.74   535.62     3.29 o
   0   4  22    35.79    34.28     0.42 o
   1   4  22     4.11     4.34     0.18 o
   2   4  22     1.41     1.43     0.19 o
   3   4  22     0.45     0.30     0.33 <
   4   4  22     1.69     1.45     0.37 o
   5   4  22     7.37     8.70     0.51 o
  -4   5  22     1.17     1.40     0.35 o
  -3   5  22     8.10     7.69     0.43 o
  -2   5  22   164.66   167.04     1.48 o
  -1   5  22     0.54     0.94     0.21 o
   0   5  22     4.29     4.02     0.19 o
   1   5  22     2.87     2.55     0.19 o
   2   5  22     1.25     0.95     0.17 o
   3   5  22     0.06     0.51     0.34 <
   4   5  22     2.70     1.83     0.39 o
   5   5  22    94.37    97.89     1.64 o
  -3   6  22   104.26   105.82     1.43 o
  -2   6  22     5.64     4.96     0.36 o
  -1   6  22    11.46    11.58     0.33 o
   0   6  22     0.04     0.15     0.16 <
   1   6  22     9.13     8.51     0.23 o
   2   6  22     0.41     0.07     0.24 <
   3   6  22     1.03     1.24     0.37 o
   4   6  22    61.38    62.63     1.85 o
  -2   7  22     0.04    -0.07     0.27 <
  -1   7  22     0.08     0.28     0.25 <
   0   7  22     0.34     0.33     0.21 <
   1   7  22     0.07     0.18     0.23 <
   2   7  22     9.11     9.15     0.36 o
   3   7  22   173.46   176.37     2.53 o
   4   7  22   175.14   176.45     3.72 o
  -1   8  22     0.00     0.06     0.26 <
   0   8  22     3.44     3.51     0.30 o
   1   8  22    37.13    37.78     0.53 o
   2   8  22   209.51   206.02     1.99 o
   3   8  22     7.01     6.91     0.53 o
  -1  -2  23    23.84    24.86     0.70 o
   0  -2  23    83.20    85.43     1.38 o
   1  -2  23     3.51     3.97     0.38 o
  -2  -1  23   440.28   459.84     5.41 o
  -1  -1  23     1.47     1.22     0.30 o
   0  -1  23     6.88     8.20     0.40 o
   1  -1  23     0.65     1.29     0.30 o
   2  -1  23     0.00    -0.01     0.28 <
  -3   0  23   136.32   139.26     2.02 o
  -2   0  23    14.65    15.25     0.51 o
  -1   0  23     9.16     9.36     0.41 o
   0   0  23     0.73     0.35     0.28 <
   1   0  23     3.36     3.75     0.34 o
   2   0  23     2.63     2.90     0.31 o
   3   0  23    21.06    22.30     0.68 o
  -3   1  23    16.92    18.52     0.51 o
  -2   1  23    18.60    18.62     0.54 o
  -1   1  23     1.44     1.39     0.30 o
   0   1  23     9.69    11.03     0.43 o
   1   1  23     0.03    -0.14     0.28 <
   2   1  23     0.66     0.46     0.28 <
   3   1  23     0.00     0.01     0.29 <
   4   1  23   409.95   426.00     7.17 o
  -3   2  23     0.07     0.21     0.38 <
  -2   2  23     0.06     0.25     0.28 <
  -1   2  23     3.48     3.70     0.33 o
   0   2  23     7.84     7.41     0.38 o
   1   2  23     3.56     3.44     0.32 o
   2   2  23    41.16    42.79     0.78 o
   3   2  23   303.41   306.83     3.83 o
   4   2  23    17.71    17.04     0.86 o
  -3   3  23     1.93     1.95     0.35 o
  -2   3  23     4.14     4.53     0.35 o
  -1   3  23    13.99    14.67     0.48 o
   0   3  23     1.55     1.84     0.25 o
   1   3  23     7.27     6.96     0.38 o
   2   3  23     0.55     0.63     0.29 <
   3   3  23     1.39     1.10     0.29 o
   4   3  23     3.68     3.79     0.55 o
  -3   4  23     0.13    -0.13     0.39 <
  -2   4  23     0.49     0.47     0.33 <
  -1   4  23    50.40    50.89     0.86 o
   0   4  23   119.36   121.78     1.52 o
   1   4  23     1.34     1.10     0.29 o
   2   4  23     2.39     2.11     0.28 o
   3   4  23     2.49     2.79     0.33 o
   4   4  23     3.46     3.36     0.41 o
  -3   5  23     0.78     0.74     0.42 <
  -2   5  23    82.80    85.05     1.24 o
  -1   5  23    62.64    63.77     0.98 o
   0   5  23     3.25     3.10     0.33 o
   1   5  23     3.64     3.23     0.32 o
   2   5  23     0.00     0.17     0.25 <
   3   5  23     0.37     0.57     0.36 <
   4   5  23     0.00     0.15     0.36 <
  -2   6  23    78.10    78.88     1.18 o
  -1   6  23    14.20    14.49     0.51 o
   0   6  23     0.34     0.20     0.28 <
   1   6  23     2.73     3.18     0.28 o
   2   6  23     0.08     0.20     0.23 <
   3   6  23     2.12     1.78     0.30 o
  -1   7  23     1.07     0.96     0.40 <
   0   7  23     0.43     0.88     0.27 o
   1   7  23     1.22     1.46     0.26 o
   2   7  23     0.73     0.73     0.27 <
  -1   0  24    64.46    66.14     1.23 o
   0   0  24     0.72     0.59     0.36 <
   1   0  24     6.67     7.66     0.48 o
  -2   1  24   105.04   106.43     1.68 o
  -1   1  24     1.76     2.32     0.39 o
   0   1  24     8.91     9.01     0.49 o
   1   1  24     0.52     0.46     0.35 <
   2   1  24     0.10     0.01     0.34 <
  -2   2  24     1.43     1.86     0.38 o
  -1   2  24     2.11     2.42     0.38 o
   0   2  24     4.81     5.51     0.37 o
   1   2  24     0.45     0.58     0.30 <
   2   2  24     1.99     2.28     0.38 o
   3   2  24    68.11    68.42     1.27 o
  -2   3  24     2.14     2.88     0.65 o
  -1   3  24     7.49     7.99     0.49 o
   0   3  24     1.14     0.85     0.29 <
   1   3  24     0.44     0.50     0.29 <
   2   3  24     7.59     6.96     0.49 o
   3   3  24    16.43    16.55     0.64 o
  -2   4  24     0.01     0.06     0.39 <
  -1   4  24    14.05    14.95     0.58 o
   0   4  24     1.82     1.62     0.31 o
   1   4  24     3.39     4.22     0.35 o
   2   4  24   213.76   214.02     2.88 o
   3   4  24     4.33     4.66     0.43 o
  -1   5  24    14.76    14.48     0.65 o
   0   5  24    92.13    90.52     1.51 o
   1   5  24    13.20    13.76     0.59 o
   2   5  24     0.02    -0.15     0.31 <
   0   6  24     0.52     0.13     0.35 <
   1   6  24     0.03     0.24     0.35 <
   2   6  24     0.55     0.86     0.27 o

loop_
 _twin_refln_datum_id
 _twin_refln_individual_id
 _twin_refln_index_h
 _twin_refln_index_k
 _twin_refln_index_l
 _twin_refln_F_squared_calc
 _twin_refln_F_squared_meas
 _twin_refln_F_squared_sigma
 _twin_refln_include_status
 ? ? ? ? ? ? ? ? ?
