# Supplementary material
Source: MDPI journal article supplement (https://www.mdpi.com/2073-4352/13/7/999)
Supplement: s1 [file s1 › CIF S2.cif]

#=======================================================================
data_global
#=======================================================================

_audit_creation_method                   'Jana2006 Version : 25/10/2015'


# 1. PROCESSING SUMMARY (IUCr Office Use Only)

_journal_date_recd_electronic            ?
_journal_date_to_coeditor                ?
_journal_date_from_coeditor              ?
_journal_date_accepted                   ?
_journal_date_printers_first             ?
_journal_date_printers_final             ?
_journal_date_proofs_out                 ?
_journal_date_proofs_in                  ?
_journal_coeditor_name                   ?
_journal_coeditor_code                   ?
_journal_coeditor_notes
; ?
;
_journal_techeditor_code                 ?
_journal_paper_category                  ?
_journal_techeditor_notes
; ?
;
_journal_coden_ASTM                      ?
_journal_name_full                       'Acta Crystallographica Section C'
_journal_year                            ?
_journal_volume                          ?
_journal_issue                           ?
_journal_page_first                      ?
_journal_page_last                       ?
_journal_suppl_publ_number               ?
_journal_suppl_publ_pages                ?

#=======================================================================

# 2. SUBMISSION DETAILS

_publ_contact_author_name                ?
_publ_contact_author_address
; ?
;
_publ_contact_author_email               ?
_publ_contact_author_fax                 ?
_publ_contact_author_phone               ?

_publ_requested_journal                  'Acta Crystallographica Section C'
_publ_requested_category                 ?

_publ_contact_letter
; ?
;

#=======================================================================

# 3. TITLE AND AUTHOR LIST

_publ_section_title
; ?
;
_publ_section_title_footnote
; ?
;
loop_
 _publ_author_name
 _publ_author_footnote
 _publ_author_address
; ?      # name
;
; ?      # footnote
;
; ?      # address
;

#=======================================================================

# 4. TEXT

_publ_section_synopsis
; ?
;
_publ_section_abstract
; ?
;
_publ_section_comment
; ?
;
_publ_section_introduction
; ?
;
_publ_section_experimental
; ?
;
_publ_section_exptl_prep
; ?
;
_publ_section_exptl_refinement
; ?
;
_publ_section_exptl_solution
; ?
;
_publ_section_discussion
; ?
;
_publ_section_acknowledgements
; ?
;
_publ_section_references
;
Petricek, V., Dusek, M. & Palatinus L. (2014). Z. Kristallogr. 229(5), 345-352.

Palatinus L. & Chapuis G. (2007). J. Appl. Cryst. 40, 786-790.

# enable this reference if Diamond ver. 2 was used for visualization
#Brandenburg, K. (1999). DIAMOND. Version. 2.1c.
#Crystal Impact GbR, Bonn, Germany.

# enable this reference if Diamond ver. 3 was used for visualization
#Brandenburg, K. & Putz, H. (2005). DIAMOND Version 3.
#Crystal Impact GbR, Postfach 1251, D-53002 Bonn, Germany.

# enable this reference if SIR97 was used for solving of the structure
#Altomare, A., Burla, M. C., Camalli, M., Cascarano, G., Giacovazzo, C.,
#Guagliardi, A., Moliterni, A. G. G., Polidori, G., Spagna, R. (1997).
#SIR97. A Package for Crystal Structure Solution by Direct Methods
#and Refinement, Bari, Rome, Italy.

# use this reference if SIR2002 was used for solving of the structure
#Burla, M.C., Camalli, M., Carrozzini, B., Cascarano, G., Giacovazzo, C.,
#Polidori, G., Spagna, R.
#SIR2002: the program, J. Appl. Cryst, (2003). 36, 1103


# use this reference if SIR2011 was used for solving of the structure
#Burla, M.C., Caliandro, R., Camalli, M., Carrozzini, B., Cascarano,
#G.L., Giacovazzo, C., Mallamo. M., Mazzone, A., Polidori, G., Spagna, R.
#SIR2011: a new package for crystal structure determination and refinement,
#J.Appl.Cryst. (2012) 45, 357-361

# enable this reference if bond valences were calculated
#Brown, I. D. (1996). J. Appl. Cryst. 29, 479-480.

# enable this reference if Xshape wase used for crystal shape refinement
#Stoe & Cie (1998). X-SHAPE. Stoe & Cie, Darmstadt, Germany.


# enable this reference if Flack coefficient was refined
#Flack, H. D. (1983). Acta Cryst. A39, 876-881.
;
_publ_section_figure_captions
; ?
;
_publ_section_table_legends
; ?
;

#=======================================================================
data_I
#=======================================================================

# 5. CHEMICAL DATA

_chemical_name_systematic
; ?
;
_chemical_name_common                    ?
_chemical_formula_moiety                 ?
_chemical_formula_structural             ?
_chemical_formula_analytical             ?
_chemical_formula_iupac                  ?
_chemical_formula_sum                    'C22 H12 O2'
_chemical_formula_weight                 308.3
_chemical_melting_point                  ?
_chemical_compound_source                ?
_chemical_absolute_configuration         ?

#=======================================================================

# 6. CRYSTAL DATA

_symmetry_cell_setting                   orthorhombic
_symmetry_space_group_name_H-M           'P 21 21 21'
_symmetry_space_group_name_Hall          'P 2xab;2ybc;2zac'
_symmetry_Int_Tables_number              19

loop_
 _space_group_symop_id
 _space_group_symop_operation_xyz
 1   x,y,z
 2   -x+1/2,-y,z+1/2
 3   -x,y+1/2,-z+1/2
 4   x+1/2,-y+1/2,-z

_cell_length_a                           3.8878(4)
_cell_length_b                           12.40010(10)
_cell_length_c                           28.9907(8)
_cell_angle_alpha                        90
_cell_angle_beta                         90
_cell_angle_gamma                        90
_cell_volume                             1397.62(15)

loop_
 _twin_individual_id
 _twin_individual_mass_fraction_refined
 _twin_individual_twin_matrix_11
 _twin_individual_twin_matrix_12
 _twin_individual_twin_matrix_13
 _twin_individual_twin_matrix_21
 _twin_individual_twin_matrix_22
 _twin_individual_twin_matrix_23
 _twin_individual_twin_matrix_31
 _twin_individual_twin_matrix_32
 _twin_individual_twin_matrix_33
 ? ? ? ? ? ? ? ? ? ? ?

_cell_formula_units_Z                    4

_cell_measurement_reflns_used            10385
_cell_measurement_theta_min              2.14
_cell_measurement_theta_max              35.57
_cell_measurement_temperature            85.03(10)
_cell_special_details
; ?
;

_exptl_crystal_density_diffrn            1.4654
_exptl_crystal_density_meas              ?
_exptl_crystal_density_method            ?
_exptl_crystal_F_000                     640

_exptl_absorpt_coefficient_mu            0.093
_exptl_crystal_description               'plate'
_exptl_crystal_size_max                  0.333
_exptl_crystal_size_mid                  0.064
_exptl_crystal_size_min                  0.031
_exptl_crystal_size_rad                  ?
_exptl_crystal_colour                    'brown'
_exptl_absorpt_correction_type           'multi-scan'
_exptl_absorpt_process_details
;
CrysAlisPro 1.171.41.88a (Rigaku Oxford Diffraction, 2020)
Empirical absorption correction using spherical harmonics,
implemented in SCALE3 ABSPACK scaling algorithm.
;
_exptl_absorpt_correction_T_min          0.844
_exptl_absorpt_correction_T_max          1
loop_
 _exptl_crystal_face_index_h
 _exptl_crystal_face_index_k
 _exptl_crystal_face_index_l
 _exptl_crystal_face_perp_dist
 ? ? ? ?

#=======================================================================

# 7. EXPERIMENTAL DATA

_exptl_special_details                   ?

_diffrn_ambient_temperature              85.03
_diffrn_source                           'Rotating-anode X-ray tube'
_diffrn_source_power                     ?
_diffrn_source_voltage                   ?
_diffrn_source_current                   ?
_diffrn_radiation_type                   'Mo K\a'
_diffrn_radiation_source                 'X-ray tube'
_diffrn_radiation_wavelength             0.71073
_diffrn_radiation_monochromator          'mirror'
_diffrn_measurement_device               'four-circle diffractometer'
_diffrn_measurement_device_type          'XtaLAB Synergy R, DW system, HyPix-Arc 150'
_diffrn_detector                         'Hybrid Pixel Array Detector'
_diffrn_detector_area_resol_mean         10.0000
_diffrn_measurement_method               '\w scans'
_diffrn_measurement_specimen_support     ?

_diffrn_reflns_number                    114915
_diffrn_reflns_theta_min                 1.79
_diffrn_reflns_theta_max                 48.78
_diffrn_reflns_theta_full                41.46
_diffrn_measured_fraction_theta_max      0.93
_diffrn_measured_fraction_theta_full     0.98
_diffrn_reflns_av_R_equivalents          0.1545
_diffrn_reflns_av_unetI/netI             0.2498
_diffrn_reflns_limit_h_min               -6
_diffrn_reflns_limit_h_max               6
_diffrn_reflns_limit_k_min               -26
_diffrn_reflns_limit_k_max               26
_diffrn_reflns_limit_l_min               -61
_diffrn_reflns_limit_l_max               59
_diffrn_reflns_reduction_process         ?

_diffrn_standards_number                 ?
_diffrn_standards_interval_count         ?
_diffrn_standards_interval_time          ?
_diffrn_standards_decay_%                ?
loop_
_diffrn_standard_refln_index_h
_diffrn_standard_refln_index_k
_diffrn_standard_refln_index_l
  ? ? ?

_diffrn_radiation_probe                  X-ray

#=======================================================================

# 8. REFINEMENT DATA

_refine_special_details
; ?
;

_reflns_number_total                     2267
_reflns_number_gt                        1537
_reflns_threshold_expression             'I>3\s(I)'

_refine_ls_structure_factor_coef         F
_refine_ls_R_factor_gt                   0.0549
_refine_ls_wR_factor_gt                  0.0525
_refine_ls_R_factor_all                  0.0887
_refine_ls_wR_factor_ref                 0.0567
_refine_ls_goodness_of_fit_ref           2.15
_refine_ls_goodness_of_fit_gt            2.48
_refine_ls_restrained_S_gt               ?
_refine_ls_restrained_S_all              ?
_refine_ls_number_reflns                 2267
_refine_ls_number_parameters             217
_refine_ls_number_restraints             0
_refine_ls_number_constraints            48
_refine_ls_weighting_scheme              sigma
_refine_ls_weighting_details             'w=1/(\s^2^(F)+0.0001F^2^)'
_refine_ls_hydrogen_treatment            'constr'
_refine_ls_shift/su_max                  0.0445
_refine_ls_shift/su_mean                 0.0087
_refine_diff_density_max                 0.54
_refine_diff_density_min                 -0.21
_refine_ls_extinction_method             'none'
_refine_ls_extinction_coef               ?
_refine_ls_abs_structure_details
;  900 of Friedel pairs used in the refinement
;
_refine_ls_abs_structure_Flack           ?
_refine_ls_abs_structure_Rogers          ?

loop_
 _atom_type_symbol
 _atom_type_scat_dispersion_real
 _atom_type_scat_dispersion_imag
 _atom_type_scat_source
 C    0.0033  0.0016
 'International Tables Vol C tables 4.2.6.8 and 6.1.1.1'
 H    0.0000  0.0000
 'International Tables Vol C tables 4.2.6.8 and 6.1.1.1'
 O    0.0106  0.0060
 'International Tables Vol C tables 4.2.6.8 and 6.1.1.1'

_computing_data_collection
 'CrysAlisPro 1.171.41.88a (Rigaku OD, 2020)'
_computing_cell_refinement
 'CrysAlisPro 1.171.41.88a (Rigaku OD, 2020)'
_computing_data_reduction
 'CrysAlisPro 1.171.41.88a (Rigaku OD, 2020)'
_computing_structure_solution            ?
_computing_structure_refinement          ?
_computing_molecular_graphics            ?
_computing_publication_material          ?

loop_
 _restr_distance_atom_site_label_1
 _restr_distance_site_symmetry_1
 _restr_distance_atom_site_label_2
 _restr_distance_site_symmetry_2
 _restr_distance_target
 _restr_distance_target_weight_param
 ? ? ? ? ? ?

loop_
 _restr_angle_atom_site_label_1
 _restr_angle_site_symmetry_1
 _restr_angle_atom_site_label_2
 _restr_angle_site_symmetry_2
 _restr_angle_atom_site_label_3
 _restr_angle_site_symmetry_3
 _restr_angle_target
 _restr_angle_target_weight_param
 ? ? ? ? ? ? ? ?

loop_
 _restr_torsion_atom_site_label_1
 _restr_torsion_site_symmetry_1
 _restr_torsion_atom_site_label_2
 _restr_torsion_site_symmetry_2
 _restr_torsion_atom_site_label_3
 _restr_torsion_site_symmetry_3
 _restr_torsion_atom_site_label_4
 _restr_torsion_site_symmetry_4
 _restr_torsion_angle_target
 _restr_torsion_weight_param
 ? ? ? ? ? ? ? ? ? ?

loop_
 _restr_equal_distance_atom_site_label_1
 _restr_equal_distance_site_symmetry_1
 _restr_equal_distance_atom_site_label_2
 _restr_equal_distance_site_symmetry_2
 _restr_equal_distance_class_class_id
 _restr_equal_distance_class_target_weight_param
 ? ? ? ? ? ?

loop_
 _restr_equal_angle_atom_site_label_1
 _restr_equal_angle_site_symmetry_1
 _restr_equal_angle_atom_site_label_2
 _restr_equal_angle_site_symmetry_2
 _restr_equal_angle_atom_site_label_3
 _restr_equal_angle_site_symmetry_3
 _restr_equal_angle_class_class_id
 _restr_equal_angle_class_target_weight_param
 ? ? ? ? ? ? ? ?

loop_
 _restr_equal_torsion_atom_site_label_1
 _restr_equal_torsion_site_symmetry_1
 _restr_equal_torsion_atom_site_label_2
 _restr_equal_torsion_site_symmetry_2
 _restr_equal_torsion_atom_site_label_3
 _restr_equal_torsion_site_symmetry_3
 _restr_equal_torsion_atom_site_label_4
 _restr_equal_torsion_site_symmetry_4
 _restr_equal_torsion_class_class_id
 _restr_equal_torsion_class_target_weight_param
 ? ? ? ? ? ? ? ? ? ?


#=======================================================================

# 9. ATOMIC COORDINATES AND DISPLACEMENT PARAMETERS

loop_
 _atom_site_label
 _atom_site_type_symbol
 _atom_site_fract_x
 _atom_site_fract_y
 _atom_site_fract_z
 _atom_site_adp_type
 _atom_site_U_iso_or_equiv
 _atom_site_site_symmetry_multiplicity
 _atom_site_occupancy
 _atom_site_calc_flag
 _atom_site_refinement_flags
 _atom_site_disorder_assembly
 _atom_site_disorder_group
  O1 O 0.3978(7) 0.72232(20) 0.09330(9) Uani 0.0472(9) 4 1 d . . .
  O2 O 0.0878(7) 0.29875(19) 0.07959(9) Uani 0.0445(8) 4 1 d . . .
  C3 C 0.3310(7) 0.6244(2) 0.09070(11) Uani 0.0255(10) 4 1 d . . .
  C4 C -0.0811(7) 0.5715(3) 0.20685(10) Uani 0.0248(9) 4 1 d . . .
  C5 C 0.4177(8) 0.5628(3) 0.04900(11) Uani 0.0261(9) 4 1 d . . .
  C6 C 0.4230(7) 0.3951(3) 0.00459(10) Uani 0.0263(10) 4 1 d . . .
  C7 C 0.5799(8) 0.6160(2) 0.01209(11) Uani 0.0275(10) 4 1 d . . .
  C8 C 0.1596(8) 0.3951(2) 0.08289(10) Uani 0.0269(10) 4 1 d . . .
  C9 C 0.0691(7) 0.4570(2) 0.12434(11) Uani 0.0239(9) 4 1 d . . .
  C10 C 0.3360(7) 0.4525(3) 0.04519(10) Uani 0.0248(9) 4 1 d . . .
  C11 C 0.6615(7) 0.5572(3) -0.02798(11) Uani 0.0316(10) 4 1 d . . .
  C12 C 0.1611(8) 0.5685(2) 0.12831(10) Uani 0.0229(9) 4 1 d . . .
  C13 C -0.0962(8) 0.4041(2) 0.16047(10) Uani 0.0241(9) 4 1 d . . .
  C14 C 0.0873(7) 0.6248(2) 0.16934(10) Uani 0.0210(8) 4 1 d . . .
  C15 C -0.6632(9) 0.4703(4) 0.35683(11) Uani 0.0485(15) 4 1 d . . .
  C16 C 0.5821(8) 0.4493(3) -0.03131(11) Uani 0.0312(10) 4 1 d . . .
  C17 C -0.1752(7) 0.4613(3) 0.20228(10) Uani 0.0238(9) 4 1 d . . .
  C18 C -0.1493(7) 0.6273(3) 0.24781(10) Uani 0.0264(10) 4 1 d . . .
  C19 C -0.3481(7) 0.4094(3) 0.23881(11) Uani 0.0281(10) 4 1 d . . .
  C20 C -0.4150(7) 0.4647(3) 0.28033(11) Uani 0.0319(11) 4 1 d . . .
  C21 C -0.5845(9) 0.4134(4) 0.31759(11) Uani 0.0411(12) 4 1 d . . .
  C22 C -0.3983(8) 0.6322(3) 0.32650(11) Uani 0.0371(11) 4 1 d . . .
  C23 C -0.3185(8) 0.5741(3) 0.28486(11) Uani 0.0332(11) 4 1 d . . .
  C24 C -0.5712(8) 0.5799(3) 0.36128(12) Uani 0.0413(12) 4 1 d . . .
  H1c6 H 0.372344 0.319523 0.001997 Uiso 0.0316 4 1 d . . .
  H1c7 H 0.634218 0.691348 0.014182 Uiso 0.0329 4 1 d . . .
  H1c11 H 0.773675 0.592697 -0.053264 Uiso 0.0379 4 1 d . . .
  H1c13 H -0.157297 0.329448 0.15744 Uiso 0.029 4 1 d . . .
  H1c14 H 0.150479 0.699334 0.172156 Uiso 0.0252 4 1 d . . .
  H1c15 H -0.782474 0.435034 0.381586 Uiso 0.0582 4 1 d . . .
  H1c16 H 0.638076 0.410833 -0.059065 Uiso 0.0374 4 1 d . . .
  H1c18 H -0.081852 0.701442 0.2509 Uiso 0.0317 4 1 d . . .
  H1c19 H -0.420773 0.335874 0.235394 Uiso 0.0337 4 1 d . . .
  H1c21 H -0.644637 0.338503 0.315401 Uiso 0.0494 4 1 d . . .
  H1c22 H -0.331774 0.706379 0.329917 Uiso 0.0445 4 1 d . . .
  H1c24 H -0.630014 0.618317 0.388917 Uiso 0.0495 4 1 d . . .

loop_
 _atom_site_aniso_label
 _atom_site_aniso_type_symbol
 _atom_site_aniso_U_11
 _atom_site_aniso_U_22
 _atom_site_aniso_U_33
 _atom_site_aniso_U_12
 _atom_site_aniso_U_13
 _atom_site_aniso_U_23
 O1 O 0.0530(17) 0.0375(14) 0.0511(16) -0.0014(13) 0.0033(13) -0.0007(11)
 O2 O 0.0565(16) 0.0389(14) 0.0381(14) -0.0021(12) 0.0042(12) 0.0018(11)
 C3 C 0.0149(16) 0.0249(16) 0.0367(18) 0.0073(12) -0.0026(13) 0.0053(14)
 C4 C 0.0117(15) 0.0358(17) 0.0268(17) 0.0021(13) -0.0019(13) 0.0019(13)
 C5 C 0.0148(15) 0.0317(16) 0.0318(17) 0.0035(13) -0.0006(13) 0.0023(13)
 C6 C 0.0094(15) 0.0417(19) 0.0278(16) 0.0077(14) -0.0040(12) -0.0042(14)
 C7 C 0.0230(17) 0.0244(15) 0.0350(18) 0.0024(15) -0.0009(13) 0.0061(14)
 C8 C 0.0272(19) 0.0323(17) 0.0211(16) 0.0023(14) -0.0035(14) 0.0004(14)
 C9 C 0.0117(14) 0.0267(16) 0.0333(17) 0.0024(13) -0.0010(13) -0.0011(13)
 C10 C 0.0152(15) 0.0342(16) 0.0249(16) 0.0090(13) -0.0009(12) 0.0000(13)
 C11 C 0.0206(16) 0.051(2) 0.0233(17) 0.0031(16) 0.0010(14) 0.0065(16)
 C12 C 0.0198(15) 0.0237(15) 0.0252(16) 0.0089(12) -0.0036(13) -0.0002(12)
 C13 C 0.0223(15) 0.0240(14) 0.0261(16) 0.0056(12) -0.0038(14) 0.0070(14)
 C14 C 0.0106(13) 0.0215(14) 0.0310(16) 0.0033(12) -0.0017(13) 0.0006(13)
 C15 C 0.027(2) 0.102(4) 0.0160(17) 0.001(2) -0.0033(15) 0.008(2)
 C16 C 0.0194(15) 0.055(2) 0.0190(16) 0.0148(16) 0.0005(13) -0.0015(15)
 C17 C 0.0167(15) 0.0335(17) 0.0213(16) 0.0066(13) -0.0020(12) 0.0002(13)
 C18 C 0.0110(14) 0.0385(19) 0.0297(17) -0.0003(13) -0.0077(13) -0.0013(14)
 C19 C 0.0155(15) 0.0408(19) 0.0280(16) 0.0035(14) -0.0085(13) 0.0033(14)
 C20 C 0.0104(15) 0.062(2) 0.0234(16) 0.0098(17) -0.0021(13) 0.0039(16)
 C21 C 0.0209(18) 0.067(2) 0.035(2) 0.0041(18) -0.0112(15) 0.0102(18)
 C22 C 0.0217(16) 0.058(2) 0.0313(19) 0.0103(17) -0.0064(15) -0.0087(17)
 C23 C 0.0213(18) 0.059(2) 0.0197(16) 0.0027(16) -0.0041(13) 0.0008(16)
 C24 C 0.0172(17) 0.081(3) 0.0259(17) 0.0043(18) 0.0004(14) -0.0018(19)

loop_
 _jana_atom_site_ADP_C_label
 _jana_atom_site_ADP_C_type_symbol
 _jana_atom_site_ADP_C_111
 _jana_atom_site_ADP_C_112
 _jana_atom_site_ADP_C_113
 _jana_atom_site_ADP_C_122
 _jana_atom_site_ADP_C_123
 _jana_atom_site_ADP_C_133
 _jana_atom_site_ADP_C_222
 _jana_atom_site_ADP_C_223
 _jana_atom_site_ADP_C_233
 _jana_atom_site_ADP_C_333
 ? ? ? ? ? ? ? ? ? ? ? ?

loop_
 _jana_atom_site_ADP_D_label
 _jana_atom_site_ADP_D_type_symbol
 _jana_atom_site_ADP_D_1111
 _jana_atom_site_ADP_D_1112
 _jana_atom_site_ADP_D_1113
 _jana_atom_site_ADP_D_1122
 _jana_atom_site_ADP_D_1123
 _jana_atom_site_ADP_D_1133
 _jana_atom_site_ADP_D_1222
 _jana_atom_site_ADP_D_1223
 _jana_atom_site_ADP_D_1233
 _jana_atom_site_ADP_D_1333
 _jana_atom_site_ADP_D_2222
 _jana_atom_site_ADP_D_2223
 _jana_atom_site_ADP_D_2233
 _jana_atom_site_ADP_D_2333
 _jana_atom_site_ADP_D_3333
 ? ? ? ? ? ? ? ? ? ? ? ? ? ? ? ? ?

loop_
 _jana_atom_site_ADP_E_label
 _jana_atom_site_ADP_E_type_symbol
 _jana_atom_site_ADP_E_11111
 _jana_atom_site_ADP_E_11112
 _jana_atom_site_ADP_E_11113
 _jana_atom_site_ADP_E_11122
 _jana_atom_site_ADP_E_11123
 _jana_atom_site_ADP_E_11133
 _jana_atom_site_ADP_E_11222
 _jana_atom_site_ADP_E_11223
 _jana_atom_site_ADP_E_11233
 _jana_atom_site_ADP_E_11333
 _jana_atom_site_ADP_E_12222
 _jana_atom_site_ADP_E_12223
 _jana_atom_site_ADP_E_12233
 _jana_atom_site_ADP_E_12333
 _jana_atom_site_ADP_E_13333
 _jana_atom_site_ADP_E_22222
 _jana_atom_site_ADP_E_22223
 _jana_atom_site_ADP_E_22233
 _jana_atom_site_ADP_E_22333
 _jana_atom_site_ADP_E_23333
 _jana_atom_site_ADP_E_33333
 ? ? ? ? ? ? ? ? ? ? ? ? ? ? ? ? ? ? ? ? ? ? ?

loop_
 _jana_atom_site_ADP_F_label
 _jana_atom_site_ADP_F_type_symbol
 _jana_atom_site_ADP_F_111111
 _jana_atom_site_ADP_F_111112
 _jana_atom_site_ADP_F_111113
 _jana_atom_site_ADP_F_111122
 _jana_atom_site_ADP_F_111123
 _jana_atom_site_ADP_F_111133
 _jana_atom_site_ADP_F_111222
 _jana_atom_site_ADP_F_111223
 _jana_atom_site_ADP_F_111233
 _jana_atom_site_ADP_F_111333
 _jana_atom_site_ADP_F_112222
 _jana_atom_site_ADP_F_112223
 _jana_atom_site_ADP_F_112233
 _jana_atom_site_ADP_F_112333
 _jana_atom_site_ADP_F_113333
 _jana_atom_site_ADP_F_122222
 _jana_atom_site_ADP_F_122223
 _jana_atom_site_ADP_F_122233
 _jana_atom_site_ADP_F_122333
 _jana_atom_site_ADP_F_123333
 _jana_atom_site_ADP_F_133333
 _jana_atom_site_ADP_F_222222
 _jana_atom_site_ADP_F_222223
 _jana_atom_site_ADP_F_222233
 _jana_atom_site_ADP_F_222333
 _jana_atom_site_ADP_F_223333
 _jana_atom_site_ADP_F_233333
 _jana_atom_site_ADP_F_333333
 ? ? ? ? ? ? ? ? ? ? ? ? ? ? ? ? ? ? ? ? ? ? ? ? ? ? ? ? ? ?


#=======================================================================

# 10. MOLECULAR GEOMETRY


loop_
 _geom_bond_atom_site_label_1
 _geom_bond_atom_site_label_2
 _geom_bond_site_symmetry_1
 _geom_bond_site_symmetry_2
 _geom_bond_distance
 _geom_bond_publ_flag
  O1 C3 . . 1.244(4) ?
  O2 C8 . . 1.231(4) ?
  C3 C5 . . 1.469(4) ?
  C3 C12 . . 1.451(4) ?
  C4 C14 . . 1.431(4) ?
  C4 C17 . . 1.422(5) ?
  C4 C18 . . 1.400(4) ?
  C5 C7 . . 1.406(4) ?
  C5 C10 . . 1.409(5) ?
  C6 C10 . . 1.417(4) ?
  C6 C16 . . 1.385(4) ?
  C6 H1c6 . . 0.96 ?
  C7 C11 . . 1.408(4) ?
  C7 H1c7 . . 0.96 ?
  C8 C9 . . 1.469(4) ?
  C8 C10 . . 1.473(4) ?
  C9 C12 . . 1.432(4) ?
  C9 C13 . . 1.393(4) ?
  C11 C16 . . 1.377(5) ?
  C11 H1c11 . . 0.96 ?
  C12 C14 . . 1.409(4) ?
  C13 C17 . . 1.437(4) ?
  C13 H1c13 . . 0.96 ?
  C14 H1c14 . . 0.96 ?
  C15 C21 . . 1.373(5) ?
  C15 C24 . . 1.411(6) ?
  C15 H1c15 . . 0.96 ?
  C16 H1c16 . . 0.96 ?
  C17 C19 . . 1.410(4) ?
  C18 C23 . . 1.422(5) ?
  C18 H1c18 . . 0.96 ?
  C19 C20 . . 1.410(5) ?
  C19 H1c19 . . 0.96 ?
  C20 C21 . . 1.416(5) ?
  C20 C23 . . 1.413(5) ?
  C21 H1c21 . . 0.96 ?
  C22 C23 . . 1.440(5) ?
  C22 C24 . . 1.375(5) ?
  C22 H1c22 . . 0.96 ?
  C24 H1c24 . . 0.96 ?

loop_
 _geom_angle_atom_site_label_1
 _geom_angle_atom_site_label_2
 _geom_angle_atom_site_label_3
 _geom_angle_site_symmetry_1
 _geom_angle_site_symmetry_2
 _geom_angle_site_symmetry_3
 _geom_angle
 _geom_angle_publ_flag
  O1 C3 C5 . . . 120.6(3) ?
  O1 C3 C12 . . . 121.0(3) ?
  C5 C3 C12 . . . 118.3(3) ?
  C14 C4 C17 . . . 119.4(3) ?
  C14 C4 C18 . . . 120.2(3) ?
  C17 C4 C18 . . . 120.4(3) ?
  C3 C5 C7 . . . 119.0(3) ?
  C3 C5 C10 . . . 121.2(3) ?
  C7 C5 C10 . . . 119.8(3) ?
  C10 C6 C16 . . . 119.2(3) ?
  C10 C6 H1c6 . . . 120.42 ?
  C16 C6 H1c6 . . . 120.42 ?
  C5 C7 C11 . . . 119.1(3) ?
  C5 C7 H1c7 . . . 120.47 ?
  C11 C7 H1c7 . . . 120.46 ?
  O2 C8 C9 . . . 121.1(3) ?
  O2 C8 C10 . . . 121.1(3) ?
  C9 C8 C10 . . . 117.8(3) ?
  C8 C9 C12 . . . 120.7(3) ?
  C8 C9 C13 . . . 118.6(3) ?
  C12 C9 C13 . . . 120.6(3) ?
  C5 C10 C6 . . . 120.0(3) ?
  C5 C10 C8 . . . 121.0(3) ?
  C6 C10 C8 . . . 119.0(3) ?
  C7 C11 C16 . . . 120.7(3) ?
  C7 C11 H1c11 . . . 119.64 ?
  C16 C11 H1c11 . . . 119.63 ?
  C3 C12 C9 . . . 121.0(3) ?
  C3 C12 C14 . . . 119.4(3) ?
  C9 C12 C14 . . . 119.7(3) ?
  C9 C13 C17 . . . 120.0(3) ?
  C9 C13 H1c13 . . . 119.99 ?
  C17 C13 H1c13 . . . 119.99 ?
  C4 C14 C12 . . . 120.4(3) ?
  C4 C14 H1c14 . . . 119.79 ?
  C12 C14 H1c14 . . . 119.79 ?
  C21 C15 C24 . . . 120.9(3) ?
  C21 C15 H1c15 . . . 119.53 ?
  C24 C15 H1c15 . . . 119.53 ?
  C6 C16 C11 . . . 121.3(3) ?
  C6 C16 H1c16 . . . 119.36 ?
  C11 C16 H1c16 . . . 119.36 ?
  C4 C17 C13 . . . 119.9(3) ?
  C4 C17 C19 . . . 119.4(3) ?
  C13 C17 C19 . . . 120.7(3) ?
  C4 C18 C23 . . . 119.9(3) ?
  C4 C18 H1c18 . . . 120.03 ?
  C23 C18 H1c18 . . . 120.03 ?
  C17 C19 C20 . . . 120.5(3) ?
  C17 C19 H1c19 . . . 119.73 ?
  C20 C19 H1c19 . . . 119.73 ?
  C19 C20 C21 . . . 121.2(3) ?
  C19 C20 C23 . . . 119.8(3) ?
  C21 C20 C23 . . . 118.9(3) ?
  C15 C21 C20 . . . 120.3(4) ?
  C15 C21 H1c21 . . . 119.84 ?
  C20 C21 H1c21 . . . 119.84 ?
  C23 C22 C24 . . . 118.9(3) ?
  C23 C22 H1c22 . . . 120.55 ?
  C24 C22 H1c22 . . . 120.54 ?
  C18 C23 C20 . . . 119.9(3) ?
  C18 C23 C22 . . . 120.0(3) ?
  C20 C23 C22 . . . 120.1(3) ?
  C15 C24 C22 . . . 120.8(3) ?
  C15 C24 H1c24 . . . 119.61 ?
  C22 C24 H1c24 . . . 119.61 ?

loop_
 _geom_torsion_atom_site_label_1
 _geom_torsion_atom_site_label_2
 _geom_torsion_atom_site_label_3
 _geom_torsion_atom_site_label_4
 _geom_torsion_site_symmetry_1
 _geom_torsion_site_symmetry_2
 _geom_torsion_site_symmetry_3
 _geom_torsion_site_symmetry_4
 _geom_torsion
 _geom_torsion_publ_flag
 ? ? ? ? ? ? ? ? ? ?

loop_
 _geom_hbond_atom_site_label_D
 _geom_hbond_atom_site_label_H
 _geom_hbond_atom_site_label_A
 _geom_hbond_site_symmetry_D
 _geom_hbond_site_symmetry_H
 _geom_hbond_site_symmetry_A
 _geom_hbond_distance_DH
 _geom_hbond_distance_HA
 _geom_hbond_distance_DA
 _geom_hbond_angle_DHA
 _geom_hbond_publ_flag
  C13 H1c13 O2 . . .   0.96   2.48   2.778(4)   97.83 ?
  C14 H1c14 O1 . . .   0.96   2.50   2.789(4)   97.50 ?


#=======================================================================

# 11. STRUCTURE-FACTOR LIST

loop_
 _refln_index_h
 _refln_index_k
 _refln_index_l
 _refln_F_squared_calc
 _refln_F_squared_meas
 _refln_F_squared_sigma
 _refln_observed_status
   4   0   0  3305.78  3490.76   195.71 o
   1   1   0     1.36     4.44     1.33 o
   3   1   0    23.45    21.08     2.66 o
   4   1   0     0.25     6.88     6.88 <
   0   2   0 26416.90 24256.20   768.85 o
   2   2   0    17.43     8.65     1.78 o
   3   2   0    12.48    19.97     2.44 o
   4   2   0   321.70   309.98    12.65 o
   2   3   0   559.91   521.44     7.10 o
   3   3   0    32.34    20.86     2.44 o
   4   3   0    59.60    59.24     7.54 o
   0   4   0  7006.95  6208.01   161.09 o
   2   4   0    18.97    19.53     2.22 o
   3   4   0    14.50    10.65     2.44 o
   4   4   0   184.23   190.60     8.88 o
   3   5   0    27.81    19.08     2.88 o
   4   5   0  1991.72  2145.22    51.70 o
   0   6   0  8282.43  9612.24   264.71 o
   3   6   0    13.77    19.53     3.11 o
   2   7   0    10.03     7.10     2.66 <
   3   7   0   144.02   145.12     4.22 o
   4   7   0  1526.91  1503.96    44.82 o
   2   8   0     2.91     2.00     2.66 <
   3   8   0    13.89    12.65     4.22 <
   1   9   0    84.41    88.98     3.33 o
   2   9   0    21.36    11.54     2.88 o
   3   9   0     0.95     8.65     4.44 <
   0  10   0     3.71    20.41     4.44 o
   2  10   0    19.51    19.75     3.11 o
   3  10   0    15.02    19.97     4.66 o
   2  11   0     1.00     3.99     3.33 <
   3  11   0    14.26    29.95     5.10 o
   0  12   0   681.16   787.48    25.96 o
   2  12   0     4.40     7.32     3.99 <
   1  13   0     4.77     7.54     4.22 <
   2  13   0    18.60    32.17     4.66 o
   0  14   0     7.54    14.20     6.66 <
   1  14   0     3.35    10.65     4.66 <
   3   0   1     6.84     4.66     2.66 <
   0   1   1     3.15     1.11     0.67 <
   2   1   1   121.24   130.03     2.44 o
  -2   1   1   121.19   130.25     2.66 o
   3   1   1     2.28     0.22     2.44 <
  -3   1   1     2.28     4.88     2.66 <
   4   1   1     1.75    -3.99     7.32 <
  -4   1   1     1.75     6.21     7.99 <
   2   2   1   184.11   185.94     2.88 o
  -2   2   1   184.05   185.50     3.11 o
   3   2   1    17.22    23.08     2.44 o
  -3   2   1    17.20    21.75     2.44 o
   4   2   1    19.42     7.77     7.10 <
  -4   2   1    19.41    39.94     7.32 o
   0   3   1   136.98   122.71     3.11 o
   2   3   1    94.67    96.08     2.22 o
  -2   3   1    94.74    93.64     2.22 o
   3   3   1     2.33     5.55     2.44 <
  -3   3   1     2.34     1.55     2.44 <
   4   3   1     1.73    13.31     6.66 <
  -4   3   1     1.72    14.87     7.10 <
   2   4   1    14.16    12.87     2.00 o
  -2   4   1    14.20    14.20     2.00 o
   3   4   1     7.69     6.88     2.44 <
  -3   4   1     7.69    12.65     2.44 o
   4   4   1    34.74    48.37     7.54 o
  -4   4   1    34.76    47.26     6.88 o
   0   5   1     0.70     3.11     2.00 <
   1   5   1   125.17   121.60     2.44 o
  -1   5   1   125.19   126.70     3.11 o
   2   5   1    18.21    18.42     2.22 o
  -2   5   1    18.20    19.53     2.22 o
   3   5   1    15.62    10.21     2.66 o
  -3   5   1    15.59    11.32     2.66 o
   0   6   1  1475.82  1689.24    32.17 o
   1   6   1    12.92     0.44     1.78 <
  -1   6   1    12.94     0.22     2.22 <
   2   6   1     0.15     3.11     2.22 <
  -2   6   1     0.16     1.78     2.22 <
   3   6   1    18.35    13.31     3.33 o
  -3   6   1    18.37    31.73     3.33 o
   4   6   1    76.91   113.83     7.77 o
  -4   6   1    76.86   108.73     7.77 o
   0   7   1   191.02   205.91     5.10 o
   1   7   1     9.13     2.44     2.22 <
  -1   7   1     9.15     0.22     2.88 <
   2   7   1    35.02    24.41     2.44 o
  -2   7   1    35.05    20.64     3.11 o
   3   7   1    19.23    21.75     3.55 o
  -3   7   1    19.25    19.97     3.55 o
   4   7   1   392.68   460.20    17.75 o
  -4   7   1   392.52   411.60    17.31 o
   1   8   1    11.58     5.77     2.66 <
  -1   8   1    11.62     2.66     2.44 <
  -2   8   1    63.22    48.15     3.11 o
   3   8   1     4.75     3.99     4.22 <
  -3   8   1     4.75     4.44     3.99 <
   0   9   1    68.97    78.11     3.33 o
   1   9   1     1.07     5.99     2.66 <
  -1   9   1     1.08     5.33     2.88 <
   2   9   1     7.68     6.21     2.66 <
  -2   9   1     7.65     3.77     2.88 <
   3   9   1    17.91    18.42     4.44 o
  -3   9   1    17.95    26.85     4.44 o
   0  10   1     6.16    17.97     2.88 o
   1  10   1     4.29    10.87     2.88 o
  -1  10   1     4.28    11.09     3.11 o
   2  10   1    10.89     9.32     2.88 o
  -2  10   1    10.88    11.54     3.11 o
   3  10   1    16.66    30.62     5.10 o
  -3  10   1    16.69    30.62     4.66 o
   0  11   1    82.63    84.54     3.99 o
   1  11   1    82.83    79.66     4.22 o
  -1  11   1    82.90    71.89     3.77 o
   2  11   1     1.93     3.77     3.55 <
  -2  11   1     1.93     5.10     3.33 <
   3  11   1    87.78    96.30     5.55 o
  -3  11   1    87.73   112.50     5.55 o
   1  12   1    92.18    94.97     4.44 o
  -1  12   1    92.26    93.86     4.44 o
   2  12   1     5.02    10.43     4.22 <
  -2  12   1     5.02     2.66     4.22 <
   0  13   1   124.41   107.39     5.33 o
   1  13   1     5.98     8.43     4.44 <
  -1  13   1     5.92     9.54     4.22 <
   2  13   1     4.98    16.42     4.88 o
  -2  13   1     4.99    13.31     4.88 <
   1  14   1     8.74     9.99     5.10 <
  -1  14   1     8.72    14.20     5.10 <
   1   0   2  4442.35  4149.99    48.37 o
   2   0   2   101.75   100.74     2.44 o
   3   0   2   306.72   308.20     5.77 o
   4   0   2    30.44    21.97     9.32 <
   0   1   2  3557.14  3188.55    64.13 o
   1   1   2  5568.69  5551.89    69.23 o
  -1   1   2  5563.95  5570.97    67.01 o
   2   1   2    18.50    17.97     1.78 o
  -2   1   2    18.52    18.19     1.78 o
   3   1   2   169.83   167.53     3.55 o
  -3   1   2   169.95   169.52     3.77 o
   4   1   2    54.02    65.24     8.21 o
  -4   1   2    54.12    61.46     9.10 o
   1   2   2  2541.28  2471.40    34.61 o
  -1   2   2  2543.14  2474.06    33.28 o
   2   2   2   277.06   249.85     3.33 o
  -2   2   2   277.18   252.73     3.77 o
   3   2   2   157.49   163.09     3.11 o
  -3   2   2   157.02   168.41     3.77 o
   4   2   2    23.92     9.32     6.21 <
  -4   2   2    23.99    23.74     7.10 o
   0   3   2  1972.36  1840.57    37.06 o
   3   3   2     6.69     4.22     2.44 <
  -3   3   2     6.69     7.10     2.44 <
   4   3   2    28.84    30.18     6.21 o
  -4   3   2    28.84    42.60     7.10 o
   1   4   2    97.73   110.28     2.44 o
  -1   4   2    97.96   103.40     2.66 o
   3   4   2   124.22   119.15     3.11 o
  -3   4   2   124.19   123.59     3.11 o
   4   4   2    52.22    45.04     6.66 o
  -4   4   2    52.35    37.94     6.21 o
   0   5   2     9.60    15.98     2.22 o
   1   5   2   775.85   723.14    11.32 o
  -1   5   2   776.53   720.70    13.31 o
   3   5   2    63.48    67.45     2.88 o
  -3   5   2    63.65    69.01     2.88 o
   4   5   2    19.63    24.19     7.32 o
  -4   5   2    19.60    24.85     7.32 o
   0   6   2    14.01    -3.99     2.22 <
   3   6   2   301.69   299.11     6.21 o
  -3   6   2   301.72   299.77     6.66 o
   4   6   2   265.32   269.60     9.76 o
  -4   6   2   265.27   272.70     9.10 o
   0   7   2   724.28   824.98    17.53 o
   2   7   2    29.91    20.19     2.66 o
  -2   7   2    29.87    20.19     2.88 o
   3   7   2   101.62   102.07     3.99 o
  -3   7   2   101.50   110.94     3.99 o
  -4   7   2    28.55    46.15     8.65 o
   0   8   2    44.66    42.16     2.88 o
   1   8   2   118.98   132.02     3.77 o
  -1   8   2   118.90   128.25     4.22 o
   2   8   2    41.06    29.51     2.66 o
  -2   8   2    41.04    23.96     2.88 o
   3   8   2    84.54    88.76     5.33 o
  -3   8   2    84.64   104.51     5.10 o
   0   9   2   183.43   174.18     4.44 o
   1   9   2    15.92    16.42     2.88 o
  -1   9   2    15.98    21.08     3.11 o
   2   9   2     1.84     2.88     2.66 <
  -2   9   2     1.82     7.10     2.66 <
   3   9   2    35.94    34.17     4.44 o
  -3   9   2    35.86    30.18     4.44 o
   0  10   2     1.69     2.66     2.88 <
   1  10   2    25.61    27.29     2.88 o
  -1  10   2    25.53    33.06     3.11 o
   2  10   2    60.11    58.36     3.33 o
  -2  10   2    60.12    59.91     3.55 o
   3  10   2   115.97   114.94     6.21 o
  -3  10   2   116.04   122.48     5.10 o
   0  11   2   117.75   101.62     3.77 o
   1  11   2   133.99   132.47     4.44 o
  -1  11   2   134.00   123.59     4.44 o
   2  11   2     4.58     2.22     3.33 <
  -2  11   2     4.62     5.77     3.33 <
   3  11   2   158.99   172.85     7.10 o
  -3  11   2   159.06   182.84     6.66 o
   1  12   2   143.31   121.82     4.44 o
  -1  12   2   143.28   124.04     4.66 o
   2  12   2     6.85    10.87     4.22 <
  -2  12   2     6.85     4.66     3.99 <
   0  13   2    84.77    74.11     4.66 o
   2  13   2     7.99    23.74     5.33 o
  -2  13   2     8.00     4.22     4.88 <
   0  14   2    19.02    26.85     4.88 o
   1  14   2    45.54    40.38     5.33 o
  -1  14   2    45.60    45.04     5.33 o
   1   0   3    54.74    54.58     1.55 o
   2   0   3     4.26     2.44     1.78 <
   3   0   3     4.35     7.10     2.66 <
   4   0   3    32.71    26.18     9.10 <
   0   1   3     3.17     5.33     1.55 o
   1   1   3 26872.50 28752.40   373.00 o
  -1   1   3 26873.10 28816.50   357.91 o
   2   1   3   390.59   426.47     5.33 o
  -2   1   3   390.51   421.81     5.55 o
   4   1   3     3.00     7.10     7.99 <
  -4   1   3     2.99    10.43     8.43 <
   0   2   3     9.19     1.55     1.78 <
  -1   2   3  6440.76  7463.68    99.85 o
   2   2   3    87.43    91.42     2.22 o
  -2   2   3    87.56    87.20     2.22 o
   3   2   3   305.83   327.29     5.10 o
  -3   2   3   305.72   328.40     5.55 o
   4   2   3     5.35     6.88     5.99 <
  -4   2   3     5.34     8.65     6.66 <
   0   3   3    69.43    82.76     2.44 o
   1   3   3    19.99    13.54     1.55 o
  -1   3   3    19.92    13.76     1.78 o
   2   3   3   220.53   200.37     3.55 o
  -2   3   3   220.59   196.82     3.33 o
   3   3   3    91.53    77.00     3.11 o
  -3   3   3    91.58    77.22     2.88 o
   4   3   3     2.52     3.77     5.99 <
  -4   3   3     2.51     8.88     7.10 <
   1   4   3   584.20   537.64     7.99 o
  -1   4   3   583.87   531.42     9.76 o
   2   4   3   142.36   157.10     3.11 o
  -2   4   3   142.33   149.11     3.11 o
   3   4   3   205.91   224.33     3.99 o
  -3   4   3   205.82   225.00     3.99 o
   4   4   3    25.85    28.62     6.43 o
  -4   4   3    25.86    27.07     5.77 o
   1   5   3  2758.79  2815.99    43.71 o
  -1   5   3  2757.68  2746.32    51.70 o
   2   5   3    13.62     6.43     2.00 o
  -2   5   3    13.61     4.22     2.44 <
   3   5   3     7.68    13.98     2.66 o
  -3   5   3     7.64    17.31     2.88 o
   4   5   3    12.36    24.19     6.21 o
  -4   5   3    12.38    26.40     6.21 o
   0   6   3     0.32    -0.44     2.44 <
   1   6   3    22.82    22.85     2.00 o
  -1   6   3    22.77    25.07     2.44 o
   2   6   3    12.69    15.98     2.44 o
  -2   6   3    12.68    14.87     2.44 o
   3   6   3  1202.54  1246.35    20.19 o
  -3   6   3  1202.65  1252.12    19.08 o
   4   6   3    25.47    31.06     7.54 o
  -4   6   3    25.46    13.09     7.99 <
   0   7   3    22.20     4.88     3.11 <
   2   7   3    52.81    54.81     2.88 o
  -2   7   3    52.82    47.48     3.33 o
   4   7   3    10.34    22.85     8.43 <
  -4   7   3    10.34    14.64     8.43 <
   0   8   3    15.74     1.33     2.66 <
   1   8   3   239.32   271.59     5.77 o
  -1   8   3   239.41   251.62     6.21 o
   2   8   3     6.48     1.78     2.66 <
  -2   8   3     6.48     5.10     2.66 <
   3   8   3   276.54   327.51     8.65 o
  -3   8   3   276.57   327.95     8.21 o
   1   9   3    13.58     8.43     2.66 o
  -1   9   3    13.52    16.20     2.88 o
   2   9   3    10.11    20.41     2.88 o
   3   9   3   109.11   110.50     4.88 o
  -3   9   3   109.29   102.96     5.10 o
   0  10   3    11.22     6.88     2.66 <
  -1  10   3    57.96    40.16     3.55 o
   3  10   3   236.39   218.78     7.77 o
  -3  10   3   236.41   232.32     7.10 o
   0  11   3     0.49     4.66     3.11 <
   1  11   3   135.64   130.25     4.22 o
  -1  11   3   135.72   138.90     4.66 o
   2  11   3    31.46    27.51     3.77 o
  -2  11   3    31.48    30.18     3.33 o
   3  11   3   131.90   161.09     6.43 o
  -3  11   3   131.82   166.42     6.88 o
   0  12   3    58.60    48.59     3.77 o
   2  12   3    11.26    -0.67     3.99 <
  -2  12   3    11.26     7.99     3.99 <
   0  13   3    13.78    15.09     4.22 o
   1  13   3   157.68   148.00     5.77 o
  -1  13   3   157.68   145.56     5.99 o
   2  13   3    21.12    14.20     5.10 <
  -2  13   3    21.13    21.30     5.10 o
   0  14   3    34.41    22.85     4.66 o
   1  14   3    36.04    48.59     5.10 o
  -1  14   3    36.07    46.15     5.33 o
   1   0   4  9557.16  9299.15   114.05 o
   2   0   4     7.10     2.88     2.00 <
   3   0   4   592.94   598.66     9.10 o
   4   0   4    22.51    18.19     9.76 <
   1   1   4 14647.40 14655.80   198.59 o
  -1   1   4 14654.20 14554.10   185.72 o
   3   1   4   591.02   622.40     9.99 o
  -3   1   4   590.89   625.73     8.88 o
   4   1   4    38.51    57.25     7.32 o
  -4   1   4    38.47    47.71     8.21 o
   1   2   4  4705.62  4907.52    71.23 o
  -1   2   4  4702.52  4941.47    68.34 o
   2   2   4   124.47   120.26     2.66 o
  -2   2   4   124.37   119.60     2.44 o
   3   2   4    62.72    67.23     2.66 o
  -3   2   4    62.95    74.33     2.66 o
   4   2   4    34.07    23.08     5.99 o
  -4   2   4    33.98    12.87     7.77 <
   3   3   4    16.68    13.54     2.88 o
  -3   3   4    16.73    12.43     2.66 o
   4   3   4     7.74    11.54     6.21 <
  -4   3   4     7.71    15.53     6.43 <
   1   4   4   162.00   155.99     3.11 o
  -1   4   4   162.49   155.32     3.33 o
   2   4   4   202.01   211.46     3.99 o
  -2   4   4   202.14   201.92     3.99 o
   3   4   4   224.27   238.31     3.99 o
  -3   4   4   224.56   243.63     4.44 o
   4   4   4    10.55    17.31     6.21 <
  -4   4   4    10.53    18.64     5.99 o
   2   5   4   120.37   125.59     3.11 o
  -2   5   4   120.49   118.71     3.33 o
   3   5   4   234.36   230.76     4.22 o
  -3   5   4   234.01   233.21     4.44 o
   4   5   4    13.32    11.54     6.43 <
  -4   5   4    13.26     5.77     6.21 <
   1   6   4   626.62   554.72     9.32 o
  -1   6   4   627.35   552.28    11.54 o
   2   6   4    44.59    59.24     2.88 o
  -2   6   4    44.64    57.47     2.88 o
   3   6   4   761.76   784.60    12.65 o
  -3   6   4   761.56   778.83    13.31 o
   4   6   4    39.26    46.15     6.88 o
  -4   6   4    39.29    31.73     7.10 o
   1   7   4   486.74   570.03    11.32 o
  -1   7   4   486.33   563.38    14.64 o
   2   7   4    29.42    34.84     2.66 o
  -2   7   4    29.38    32.17     3.11 o
  -3   7   4   311.46   368.78     7.99 o
   4   7   4    34.92    24.41     8.43 <
  -4   7   4    35.02    39.94     7.77 o
   0   8   4     6.19     6.43     2.88 <
   1   8   4   322.57   372.11     7.32 o
  -1   8   4   322.26   372.11     8.21 o
   2   8   4    75.45    83.43     3.11 o
  -2   8   4    75.30    79.66     3.33 o
   3   8   4   405.61   428.25    10.21 o
  -3   8   4   405.67   414.71     9.76 o
   1   9   4    37.06    36.39     2.66 o
  -1   9   4    37.13    40.83     3.11 o
   2   9   4     4.38     6.88     2.88 <
  -2   9   4     4.39    14.87     3.11 o
   3   9   4    33.05    35.50     3.99 o
  -3   9   4    32.99    37.50     4.44 o
   0  10   4    15.78    18.19     2.66 o
   1  10   4    32.41    33.06     2.88 o
  -1  10   4    32.50    32.84     3.77 o
   2  10   4   151.59   141.57     3.99 o
  -2  10   4   151.73   149.33     4.66 o
   3  10   4   134.29   130.47     5.77 o
  -3  10   4   134.09   141.57     5.77 o
   0  11   4    25.11    15.98     2.88 o
   1  11   4    73.54    88.09     3.77 o
  -1  11   4    73.34    79.66     4.44 o
   3  11   4   124.13   140.46     5.99 o
  -3  11   4   124.13   151.33     6.21 o
   0  12   4     0.54     6.43     3.77 <
   1  12   4    42.27    45.71     3.55 o
  -1  12   4    42.15    42.38     3.77 o
   2  12   4    22.05    17.75     3.99 o
  -2  12   4    22.01    26.18     3.77 o
   0  13   4     4.74    -2.44     3.99 <
   1  13   4   176.60   195.04     6.66 o
  -1  13   4   176.70   175.74     6.21 o
   2  13   4     0.55     8.88     4.88 <
  -2  13   4     0.56     8.88     5.10 <
   0  14   4    21.96    26.18     4.66 o
   1  14   4    24.94    25.07     4.88 o
  -1  14   4    24.98    22.41     5.10 o
   2   0   5   819.84   884.67    11.09 o
   4   0   5    10.56     5.33     7.99 <
   0   1   5    26.27     2.00     1.78 <
   2   1   5   393.74   386.75     5.33 o
  -2   1   5   393.84   388.97     5.33 o
   3   1   5    92.68    93.19     3.11 o
  -3   1   5    92.64    96.97     3.11 o
   4   1   5     1.59    -3.77     6.88 <
  -4   1   5     1.60    -7.54     7.77 <
   3   2   5     5.53     6.21     2.66 <
  -3   2   5     5.54     1.78     2.44 <
   4   2   5     4.86    -4.66     5.99 <
  -4   2   5     4.86    12.43     7.10 <
   2   3   5   597.60   634.16     9.54 o
  -2   3   5   597.37   630.39     8.65 o
   3   3   5    23.32    21.52     2.44 o
  -3   3   5    23.29    17.97     2.66 o
   4   3   5    12.36     6.21     5.55 <
  -4   3   5    12.36     6.21     6.21 <
   1   4   5    41.74    34.84     2.22 o
  -1   4   5    41.74    34.61     2.00 o
   2   4   5   385.03   402.73     6.66 o
  -2   4   5   384.69   402.29     6.21 o
   3   4   5    10.86    13.54     2.44 o
  -3   4   5    10.86    11.76     2.66 o
   4   4   5     4.16     2.44     6.21 <
  -4   4   5     4.15     7.32     5.99 <
   2   5   5   142.11   146.89     3.33 o
  -2   5   5   142.28   146.45     3.55 o
   3   5   5    66.05    55.25     2.88 o
  -3   5   5    66.03    62.13     2.88 o
   4   5   5     2.09     7.32     6.21 <
  -4   5   5     2.09     0.44     6.43 <
   0   6   5     0.74    -1.33     2.22 <
   1   6   5   108.46   108.95     3.11 o
  -1   6   5   108.42   103.62     3.33 o
   2   6   5   145.95   149.77     3.77 o
  -2   6   5   146.20   146.89     3.99 o
   3   6   5   107.39   103.84     3.77 o
  -3   6   5   107.39    95.63     4.44 o
   4   6   5     4.23     2.00     7.54 <
  -4   6   5     4.25     8.43     7.10 <
   1   7   5    89.26    96.52     3.11 o
  -1   7   5    89.22    89.87     3.77 o
   2   7   5    54.35    52.14     2.88 o
  -2   7   5    54.30    49.26     3.55 o
   3   7   5   133.53   137.79     4.66 o
  -3   7   5   133.53   136.91     4.44 o
   4   7   5     3.47    11.32    10.21 <
  -4   7   5     3.45     9.76     7.77 <
   0   8   5    25.38    32.40     3.11 o
   1   8   5     6.16    13.76     2.44 o
  -1   8   5     6.21     9.76     2.66 o
   2   8   5   276.14   276.03     5.55 o
  -2   8   5   276.30   284.46     5.55 o
   3   8   5    95.07   109.39     4.88 o
  -3   8   5    94.97   104.51     5.10 o
   1   9   5    27.76    35.50     2.66 o
  -1   9   5    27.83    35.28     3.11 o
   3   9   5    16.27    17.75     3.77 o
  -3   9   5    16.26    15.31     4.22 o
   0  10   5     4.12    -1.33     2.66 <
   1  10   5    26.08    19.30     2.66 o
  -1  10   5    26.06    20.86     3.33 o
   3  10   5     2.79    13.09     4.44 <
  -3  10   5     2.77    14.42     4.88 <
   0  11   5    25.24     8.21     2.88 <
   1  11   5    52.39    49.92     3.33 o
  -1  11   5    52.42    57.47     4.22 o
   2  11   5   641.56   664.78    11.76 o
  -2  11   5   641.43   671.66    11.32 o
   3  11   5    81.95    95.86     5.10 o
  -3  11   5    81.96    88.76     5.55 o
   0  12   5     0.94     3.99     4.22 <
   1  12   5    43.55    36.61     3.55 o
  -1  12   5    43.63    32.62     4.22 o
   2  12   5    27.01    44.16     4.22 o
  -2  12   5    27.04    46.15     3.99 o
   0  13   5     0.94     7.77     4.22 <
   1  13   5    94.06   120.71     5.10 o
  -1  13   5    94.10   106.29     5.33 o
   2  13   5    32.65    29.51     5.10 o
  -2  13   5    32.69    40.83     5.10 o
   0  14   5     5.05     8.65     4.66 <
   1  14   5    17.72    17.31     4.88 o
  -1  14   5    17.66    15.09     4.88 o
   1   0   6   788.88   828.53    11.09 o
   2   0   6   632.09   611.30     7.77 o
   3   0   6    36.28    35.50     2.66 o
   4   0   6     3.46    10.43     8.43 <
   0   1   6    15.30    10.43     2.22 o
   1   1   6     9.29     8.43     1.78 o
  -1   1   6     9.26     9.76     1.78 o
   2   1   6  6906.66  7994.66   104.95 o
   3   1   6    64.97    59.91     2.66 o
  -3   1   6    64.85    62.13     2.88 o
   4   1   6    37.28    24.41     6.88 o
  -4   1   6    37.27    21.30     7.54 <
   3   2   6    62.00    69.45     2.66 o
  -3   2   6    62.04    61.69     2.66 o
   4   2   6    23.44    29.95     6.66 o
  -4   2   6    23.45    19.97     7.10 <
   0   3   6     1.92     2.66     2.44 <
   2   3   6  2424.07  2604.98    36.17 o
  -2   3   6  2424.61  2573.91    34.61 o
   3   3   6   130.65   122.48     3.11 o
  -3   3   6   131.02   127.36     3.33 o
   4   3   6     1.75     0.89     5.33 <
  -4   3   6     1.75    -3.99     5.55 <
   2   4   6  1288.98  1394.13    20.41 o
  -2   4   6  1288.90  1386.36    19.75 o
   3   4   6    17.89    11.09     2.66 o
  -3   4   6    17.85    13.31     2.66 o
   4   4   6    13.57    18.42     5.99 o
  -4   4   6    13.57     6.21     5.55 <
   0   5   6     3.85     3.99     2.44 <
   2   5   6   346.66   345.48     6.21 o
  -2   5   6   346.24   329.28     5.55 o
   4   5   6     6.38    12.43     5.77 <
  -4   5   6     6.39     4.66     6.21 <
   2   6   6   415.24   440.45     7.54 o
  -2   6   6   415.36   431.80     7.54 o
   3   6   6     3.39     5.33     3.33 <
  -3   6   6     3.41     7.99     3.55 <
   4   6   6     1.58     8.88     7.10 <
  -4   6   6     1.58     7.99     6.88 <
   0   7   6    40.17    29.95     2.88 o
   2   7   6   819.91   840.96    14.64 o
  -2   7   6   819.95   817.66    15.31 o
   3   7   6    39.78    35.72     3.55 o
  -3   7   6    39.71    32.40     3.33 o
   4   7   6    26.12    28.18     8.65 o
  -4   7   6    26.10     5.33     7.77 <
   0   8   6    22.69     5.99     2.88 <
   1   8   6   191.39   188.61     3.99 o
  -1   8   6   191.07   188.16     4.66 o
   2   8   6   759.31   806.57    13.76 o
  -2   8   6   759.58   773.95    12.87 o
   3   8   6     7.34     8.43     3.55 <
  -3   8   6     7.35    15.75     4.22 o
   0   9   6     8.04    14.20     3.11 o
   3   9   6     3.79     8.65     3.77 <
  -3   9   6     3.84     9.54     4.22 <
   0  10   6    20.88     8.21     3.11 <
   1  10   6    46.64    43.49     2.66 o
  -1  10   6    46.73    41.49     3.33 o
   2  10   6   760.62   761.52    13.76 o
  -2  10   6   760.22   765.74    13.54 o
   3  10   6    22.66    33.28     4.44 o
  -3  10   6    22.63    25.74     4.88 o
   0  11   6    14.84    14.87     3.11 o
   1  11   6    28.20    19.97     3.11 o
  -1  11   6    28.18    20.64     3.33 o
   2  11   6   507.80   539.63     9.76 o
  -2  11   6   507.98   519.22     9.76 o
   3  11   6     5.08    14.64     4.66 o
  -3  11   6     5.07    21.08     5.10 o
   0  12   6    24.45    40.61     3.99 o
   1  12   6     5.19    14.20     3.55 o
  -1  12   6     5.19    11.09     3.99 <
   2  12   6    90.27    87.87     4.66 o
  -2  12   6    90.37    83.43     4.44 o
   0  13   6     8.47    10.21     4.66 <
   1  13   6    20.13    36.39     4.44 o
  -1  13   6    20.12    40.61     4.44 o
   2  13   6    68.25    79.44     5.33 o
  -2  13   6    68.05    84.54     5.10 o
   0  14   6    34.08    29.73     4.66 o
   1  14   6    15.77     3.11     4.88 <
  -1  14   6    15.77     7.10     4.66 <
   1   0   7    14.52    12.87     1.78 o
   2   0   7  2541.57  2658.23    32.84 o
   3   0   7     4.85     9.99     2.44 o
   4   0   7     0.23     2.00     6.43 <
   0   1   7     6.20     1.11     2.22 <
   2   1   7  1975.81  2174.96    28.62 o
  -2   1   7  1976.11  2208.91    27.96 o
   3   1   7    35.26    31.51     2.44 o
  -3   1   7    35.24    30.84     2.44 o
   4   1   7     4.66     9.32     6.66 <
  -4   1   7     4.66     6.21     6.66 <
   0   2   7     1.68    -0.89     2.44 <
   1   2   7    83.72    76.11     2.44 o
  -1   2   7    83.52    78.55     2.44 o
   2   2   7  2448.71  2636.71    34.61 o
  -2   2   7  2448.60  2672.21    34.17 o
   3   2   7     8.08    -1.33     2.44 <
  -3   2   7     8.06     3.77     2.44 <
   4   2   7     2.50    11.32     6.43 <
  -4   2   7     2.50    -2.00     7.10 <
   0   3   7    31.77    24.85     2.66 o
   1   3   7   111.65   115.60     2.88 o
  -1   3   7   111.45   107.84     2.66 o
   2   3   7  3521.34  3649.41    49.04 o
  -2   3   7  3521.22  3652.74    50.81 o
   3   3   7    10.81    21.75     2.22 o
  -3   3   7    10.78    19.97     2.66 o
   4   3   7     3.38     3.99     5.77 <
  -4   3   7     3.38    12.65     6.21 <
   0   4   7    13.21    18.86     2.66 o
   1   4   7   151.86   161.54     4.22 o
  -1   4   7   151.83   162.42     3.33 o
   2   4   7   571.40   582.24     9.10 o
  -2   4   7   571.37   573.58     8.43 o
   3   4   7    17.70    20.19     2.66 o
  -3   4   7    17.75    19.75     2.66 o
   4   4   7     1.78     2.22     5.77 <
  -4   4   7     1.78    14.20     5.99 <
   0   5   7     3.13     2.44     2.44 <
   2   5   7  1019.72  1146.94    18.19 o
  -2   5   7  1019.55  1128.97    16.20 o
   3   5   7    17.65    16.86     3.11 o
  -3   5   7    17.68    18.64     2.88 o
   4   5   7     0.60     3.33     5.99 <
  -4   5   7     0.60     0.44     5.77 <
   1   6   7    70.33    62.13     2.88 o
  -1   6   7    70.40    65.46     2.88 o
   2   6   7   109.37   119.60     3.55 o
  -2   6   7   109.43   112.28     3.55 o
   3   6   7    56.49    50.59     3.55 o
  -3   6   7    56.49    51.26     3.55 o
   4   6   7     8.07    10.87     6.66 <
  -4   6   7     8.07    10.43     6.88 <
   1   7   7    25.87     4.88     2.44 <
  -1   7   7    25.90     9.99     2.66 o
   2   7   7  1304.76  1304.93    22.19 o
  -2   7   7  1304.48  1278.08    21.75 o
   3   7   7     4.15     0.89     3.55 <
  -3   7   7     4.17     5.55     3.55 <
   4   7   7     4.81    17.09     7.77 <
  -4   7   7     4.83    -8.21     7.99 <
   1   8   7    12.62     4.66     2.44 <
  -1   8   7    12.61    13.09     2.66 o
   2   8   7   254.26   261.83     5.33 o
  -2   8   7   254.01   262.94     5.33 o
   3   8   7    18.19    16.20     3.77 o
  -3   8   7    18.20     9.99     4.22 <
   0   9   7    16.61     4.44     3.11 <
   1   9   7    26.32    20.19     2.66 o
  -1   9   7    26.32    28.18     3.33 o
   2   9   7   741.45   774.84    12.87 o
  -2   9   7   741.83   763.52    14.42 o
   3   9   7     3.54     3.11     3.77 <
  -3   9   7     3.53     8.88     4.22 <
   0  10   7     1.75     1.11     2.88 <
   1  10   7    14.17    23.30     2.66 o
  -1  10   7    14.14    11.54     3.33 o
   2  10   7   549.78   565.82    10.21 o
  -2  10   7   550.00   568.04    11.32 o
   3  10   7     8.75    18.42     4.44 o
  -3  10   7     8.77    11.09     4.66 <
   0  11   7    33.95    28.40     3.33 o
   1  11   7    42.07    43.49     3.33 o
  -1  11   7    42.01    48.37     3.55 o
   2  11   7   131.20   159.98     4.88 o
  -2  11   7   131.12   146.23     5.10 o
   0  12   7    20.62    19.30     3.99 o
   1  12   7    10.69     4.22     3.55 <
  -1  12   7    10.73     7.32     4.44 <
   2  12   7   106.50   104.29     4.88 o
  -2  12   7   106.50    90.31     4.66 o
   0  13   7     4.08     5.77     4.44 <
   1  13   7    38.36    40.16     4.44 o
  -1  13   7    38.35    40.61     4.66 o
  -2  13   7     2.98    19.75     4.88 o
   0  14   7    21.38    13.09     4.88 <
   1  14   7     1.57     0.67     4.88 <
  -1  14   7     1.55     4.88     4.88 <
   2   0   8     0.09     2.22     2.22 <
   3   0   8     6.74     7.32     2.44 <
   4   0   8     0.63     6.43     6.66 <
   3   1   8    76.52    62.79     2.66 o
  -3   1   8    76.47    65.46     2.66 o
   4   1   8    26.91    27.51     6.43 o
  -4   1   8    26.94    22.63     6.88 o
   0   2   8   351.85   319.30     6.66 o
   2   2   8  2170.47  2312.53    31.29 o
  -2   2   8  2170.92  2322.29    30.62 o
   3   2   8   543.71   527.87     7.77 o
  -3   2   8   542.86   522.10     7.54 o
   4   2   8     9.14     3.11     6.43 <
  -4   2   8     9.13    -2.00     6.88 <
   1   3   8  1397.28  1444.94    22.19 o
  -1   3   8  1396.21  1418.32    23.08 o
   3   3   8   103.38   103.84     2.88 o
  -3   3   8   103.51   109.39     3.11 o
   4   3   8     5.14     9.99     6.21 <
  -4   3   8     5.16     0.22     6.21 <
   0   4   8   119.26   100.74     3.55 o
   1   4   8   244.54   244.97     5.10 o
  -1   4   8   244.99   242.08     4.44 o
   3   4   8   243.84   253.84     4.66 o
  -3   4   8   244.15   252.29     4.44 o
   4   4   8     5.94    -1.33     5.77 <
  -4   4   8     5.98     8.43     6.43 <
   1   5   8    64.97    50.59     2.88 o
  -1   5   8    65.07    51.03     2.66 o
   2   5   8    81.21    80.10     2.88 o
  -2   5   8    81.27    81.66     2.66 o
   3   5   8     4.63    13.31     2.66 o
  -3   5   8     4.60     8.88     2.88 o
   4   5   8     2.15     8.21     6.43 <
  -4   5   8     2.17     5.99     5.99 <
   0   6   8    24.56    11.09     2.66 o
   1   6   8     5.63     3.11     2.88 <
  -1   6   8     5.58     3.99     2.66 <
   3   6   8     7.53    14.87     3.33 o
  -3   6   8     7.54     7.77     3.33 <
   4   6   8    20.34    26.18     6.43 o
  -4   6   8    20.31     9.99     7.10 <
   1   7   8    24.65     1.55     2.66 <
  -1   7   8    24.59    -0.44     2.66 <
   2   7   8   116.59   123.81     3.99 o
  -2   7   8   116.73   121.37     4.22 o
   3   7   8     4.68     1.78     3.55 <
  -3   7   8     4.70     2.44     3.99 <
   2   8   8   765.26   804.35    13.31 o
  -2   8   8   765.14   797.25    12.65 o
   3   8   8     6.78    16.42     3.99 o
  -3   8   8     6.80    12.65     3.99 o
   0   9   8    47.71    32.62     3.33 o
   1   9   8   282.77   306.65     6.43 o
  -1   9   8   283.07   325.29     7.77 o
   2   9   8   207.15   190.60     4.44 o
  -2   9   8   206.91   190.16     5.33 o
   3   9   8    82.13    84.10     4.66 o
  -3   9   8    82.08    87.42     4.66 o
   0  10   8     2.66     4.88     3.55 <
   1  10   8   316.95   303.10     6.21 o
  -1  10   8   317.01   301.10     7.10 o
   2  10   8    16.50    24.63     3.77 o
  -2  10   8    16.50    22.85     4.22 o
   3  10   8    82.96    85.87     5.10 o
  -3  10   8    82.99    80.10     5.10 o
   0  11   8    57.80    57.03     3.99 o
   1  11   8   189.24   196.15     5.33 o
  -1  11   8   189.25   191.71     5.77 o
   2  11   8     8.75    13.54     3.99 o
  -2  11   8     8.74    17.75     3.99 o
   0  12   8     6.06    17.09     3.99 o
   1  12   8     4.07    10.87     3.77 <
  -1  12   8     4.10    15.75     4.44 o
   2  12   8    31.65    43.71     4.88 o
  -2  12   8    31.61    40.83     4.44 o
   0  13   8     1.60     5.99     4.44 <
   1  13   8    61.85    42.60     4.44 o
  -1  13   8    61.79    44.38     4.88 o
   2  13   8    44.29    50.15     5.10 o
  -2  13   8    44.35    43.71     4.88 o
   0  14   8    10.10    21.08     4.88 o
   1  14   8     3.53    -4.22     5.10 <
  -1  14   8     3.53     6.66     5.10 <
   1   0   9     6.15     2.22     2.00 <
   3   0   9     9.94    15.09     2.66 o
   4   0   9    17.99     1.55     6.66 <
   1   1   9    20.17    20.86     2.44 o
  -1   1   9    20.16    20.86     2.22 o
   2   1   9   261.92   255.17     4.44 o
  -2   1   9   262.10   248.07     4.22 o
   3   1   9    48.02    44.16     2.66 o
  -3   1   9    48.04    46.37     2.66 o
   4   1   9     8.42    15.98     6.88 <
  -4   1   9     8.43    -1.78     6.88 <
   2   2   9   128.62   129.58     2.88 o
  -2   2   9   128.40   129.36     3.11 o
   3   2   9  1838.54  1805.29    24.41 o
  -3   2   9  1838.89  1775.33    22.63 o
   4   2   9     0.12     8.88     6.66 <
  -4   2   9     0.12    -1.33     5.99 <
   1   3   9  3741.88  4192.37    64.57 o
  -1   3   9  3741.78  4148.22    77.66 o
   2   3   9     5.47     3.99     2.00 <
  -2   3   9     5.45     2.66     2.22 <
   3   3   9   204.03   215.01     4.22 o
  -3   3   9   204.07   208.58     3.77 o
   4   3   9     4.56     2.88     6.21 <
  -4   3   9     4.54     5.55     5.77 <
   0   4   9    34.88     4.22     2.88 <
   1   4   9    41.60    49.26     2.44 o
  -1   4   9    41.43    48.59     2.44 o
   2   4   9    60.95    61.46     2.44 o
  -2   4   9    61.08    55.92     2.66 o
   3   4   9  1034.44  1079.71    14.20 o
  -3   4   9  1034.11  1051.98    12.43 o
   4   4   9     1.61     8.65     5.77 <
  -4   4   9     1.62     0.22     5.99 <
   1   5   9   414.28   399.62     8.43 o
  -1   5   9   414.41   402.06     7.10 o
   2   5   9    10.17    13.98     2.44 o
  -2   5   9    10.16    15.75     2.66 o
   3   5   9     4.52     6.21     2.66 <
  -3   5   9     4.50     0.00     3.11 <
   4   5   9     2.32     0.22     6.21 <
  -4   5   9     2.33     1.11     6.21 <
   0   6   9    10.53    23.52     3.77 o
   2   6   9    18.60    20.64     2.88 o
  -2   6   9    18.57    17.75     3.33 o
   3   6   9    51.62    52.59     3.33 o
  -3   6   9    51.62    53.70     3.55 o
   4   6   9     9.02     2.22     7.32 <
  -4   6   9     9.02     7.77     6.43 <
   2   7   9     5.62     0.00     3.11 <
  -2   7   9     5.63    -2.00     3.33 <
   3   7   9    55.59    44.60     3.77 o
  -3   7   9    55.47    39.50     4.22 o
   0   8   9    21.04    14.20     2.88 o
   1   8   9    19.88    15.98     2.88 o
  -1   8   9    19.87    15.53     2.66 o
   2   8   9    40.81    50.81     3.11 o
  -2   8   9    40.81    52.14     3.33 o
   3   8   9    26.84    20.86     3.99 o
  -3   8   9    26.91    17.09     4.22 o
   0   9   9    15.01    16.42     3.11 o
   1   9   9  1975.63  1959.50    33.73 o
  -1   9   9  1975.66  1985.69    35.06 o
   2   9   9     9.04     8.43     3.11 <
  -2   9   9     9.02     8.43     3.55 <
   3   9   9   265.61   250.07     6.43 o
  -3   9   9   265.69   260.72     6.66 o
   0  10   9    18.02     9.99     3.77 <
   1  10   9   197.67   185.50     4.66 o
  -1  10   9   197.42   189.49     5.10 o
   2  10   9    17.27     7.10     3.55 <
  -2  10   9    17.27    13.54     3.99 o
   3  10   9    19.99    21.52     4.88 o
  -3  10   9    20.02    27.29     4.88 o
   0  11   9    11.99    22.41     3.77 o
   1  11   9   224.31   211.68     5.55 o
  -1  11   9   224.25   215.23     5.99 o
   2  11   9     1.10     5.10     3.99 <
  -2  11   9     1.08     3.77     4.22 <
   0  12   9    51.63    33.95     3.99 o
   1  12   9    41.62    36.17     3.99 o
  -1  12   9    41.69    40.61     4.66 o
   2  12   9     8.31    11.98     4.66 <
  -2  12   9     8.34    10.65     4.66 <
   0  13   9     4.78    11.54     4.22 <
   1  13   9    38.06    35.95     4.44 o
  -1  13   9    38.04    32.62     5.10 o
   0  14   9    21.06    19.08     4.88 o
   1  14   9     9.08    11.76     5.10 <
  -1  14   9     9.08    14.87     5.10 <
   0   0  10    33.55    49.26     4.88 o
   1   0  10    99.14    95.86     2.66 o
   2   0  10    31.45    30.84     2.22 o
   3   0  10     7.38    11.76     2.66 o
   4   0  10    34.83    15.09     6.21 <
   2   1  10    35.49    33.51     2.44 o
  -2   1  10    35.23    25.96     2.22 o
   3   1  10   205.00   199.04     3.99 o
  -3   1  10   205.10   199.48     3.99 o
   4   1  10    11.72     2.88     6.21 <
  -4   1  10    11.69    11.32     5.77 <
   1   2  10  1489.83  1678.81    25.07 o
  -1   2  10  1490.16  1686.14    25.96 o
   2   2  10   418.05   386.09     5.99 o
  -2   2  10   417.83   388.75     6.21 o
   3   2  10  1275.91  1260.33    17.09 o
  -3   2  10  1276.67  1247.90    16.42 o
   4   2  10    75.87    73.89     6.43 o
  -4   2  10    75.89    75.00     6.66 o
   0   3  10    16.05     7.32     2.66 <
   3   3  10   706.18   753.76    11.09 o
  -3   3  10   705.74   734.23     9.54 o
   4   3  10    74.47    42.82     6.43 o
  -4   3  10    74.58    45.04     6.21 o
   0   4  10    16.08    -3.77     2.66 <
   1   4  10   841.29   767.51    12.87 o
  -1   4  10   840.37   771.51    13.54 o
   3   4  10   615.34   630.39     9.99 o
  -3   4  10   615.18   618.41     8.43 o
   4   4  10    24.25     9.76     5.77 <
  -4   4  10    24.17    15.09     6.21 <
   0   5  10   320.07   306.65     6.66 o
   2   5  10    97.18    93.42     3.11 o
  -2   5  10    97.23    85.65     3.33 o
   3   5  10   140.87   132.91     3.99 o
  -3   5  10   141.12   131.80     3.99 o
   4   5  10    22.78    13.09     5.77 <
  -4   5  10    22.75    24.63     6.66 o
   0   6  10     1.17     8.21     3.99 <
   1   6  10   107.24    86.09     3.99 o
  -1   6  10   106.94    88.53     3.33 o
   2   6  10     9.99     2.44     2.88 <
  -2   6  10    10.01     0.89     3.11 <
   3   6  10    12.73    19.53     3.11 o
  -3   6  10    12.75    10.87     3.55 o
   4   6  10    34.10    31.29     7.10 o
  -4   6  10    34.16    33.73     6.88 o
   0   7  10   141.40   140.01     4.22 o
   1   7  10   226.62   195.71     5.10 o
  -1   7  10   226.43   202.81     4.22 o
   2   7  10    40.65    37.94     3.11 o
  -2   7  10    40.73    35.28     3.33 o
   3   7  10    41.40    20.64     3.77 o
  -3   7  10    41.55    29.29     4.22 o
   0   8  10   114.21   123.15     3.77 o
   1   8  10   561.26   606.87    11.54 o
  -1   8  10   561.82   589.34    10.21 o
   2   8  10    23.27    17.75     2.88 o
  -2   8  10    23.32    23.96     3.33 o
  -3   8  10   142.29   114.27     4.66 o
   0   9  10   104.34   114.50     4.22 o
   1   9  10  1442.28  1455.15    26.63 o
  -1   9  10  1442.25  1384.81    23.30 o
   2   9  10    13.16    12.43     3.11 o
  -2   9  10    13.15    19.97     3.55 o
   3   9  10   162.15   163.75     5.55 o
  -3   9  10   162.01   165.75     5.55 o
   0  10  10    93.86    75.00     4.22 o
   1  10  10   595.74   562.71    10.65 o
  -1  10  10   595.72   557.16    10.65 o
   2  10  10    46.84    36.17     3.77 o
  -2  10  10    46.84    37.72     3.99 o
   3  10  10   100.87   115.60     5.33 o
  -3  10  10   100.80   113.61     5.77 o
   0  11  10     1.15    10.65     3.77 <
   1  11  10    72.88    78.77     3.99 o
  -1  11  10    72.94    84.10     4.88 o
   2  11  10     4.33    14.64     3.99 o
  -2  11  10     4.34    10.65     4.22 <
   0  12  10    23.57    19.08     4.22 o
   1  12  10    41.56    52.81     4.44 o
  -1  12  10    41.48    47.93     4.66 o
   2  12  10     1.58     6.21     4.44 <
  -2  12  10     1.57     7.54     4.88 <
   0  13  10    27.82    19.97     4.44 o
   1  13  10    19.12    22.63     4.44 o
  -1  13  10    19.10    28.18     4.88 o
   0  14  10     7.02    15.98     5.10 o
   1   0  11    43.87    50.15     2.44 o
   3   0  11    19.99    11.54     2.66 o
   4   0  11    23.48    17.97     6.21 <
   1   1  11    31.05    30.84     2.22 o
  -1   1  11    31.14    28.85     2.44 o
   2   1  11    34.38    31.29     2.44 o
  -2   1  11    34.36    32.17     2.44 o
   3   1  11    73.43    67.23     2.88 o
  -3   1  11    73.47    67.23     2.88 o
   4   1  11     1.22     2.22     5.77 <
  -4   1  11     1.22     2.22     5.77 <
   0   2  11   326.18   284.91     6.21 o
   1   2  11  1240.41  1383.48    21.30 o
  -1   2  11  1240.37  1390.36    21.08 o
   2   2  11     6.40     1.11     2.22 <
  -2   2  11     6.39     1.11     2.44 <
   3   2  11   155.32   163.75     3.77 o
  -3   2  11   155.32   170.41     3.77 o
   4   2  11     3.77    11.09     5.55 <
  -4   2  11     3.76    14.42     5.77 <
   0   3  11    17.44     3.11     3.11 <
   1   3  11   169.50   178.40     3.99 o
  -1   3  11   169.40   168.41     4.44 o
   2   3  11    12.58     8.88     2.22 o
  -2   3  11    12.62     9.32     2.44 o
   3   3  11   612.07   612.41     9.10 o
  -3   3  11   612.14   609.75     8.43 o
   4   3  11    73.78    96.52     7.99 o
  -4   3  11    73.73    78.33     6.88 o
   0   4  11    17.40    21.08     2.66 o
   1   4  11   559.14   513.90     9.10 o
  -1   4  11   559.01   514.12     9.32 o
   2   4  11     6.83     1.55     2.66 <
  -2   4  11     6.82     0.44     2.44 <
   3   4  11   135.32   118.49     3.55 o
  -3   4  11   135.30   119.82     3.55 o
   4   4  11    25.99    22.19     6.66 o
  -4   4  11    25.95    26.18     6.43 o
   0   5  11    14.06     3.33     3.33 <
   1   5  11    13.78    11.32     3.11 o
  -1   5  11    13.78    10.87     3.11 o
   2   5  11    29.97    16.86     2.44 o
  -2   5  11    29.91    16.64     2.88 o
   3   5  11    72.06    76.77     3.55 o
  -3   5  11    72.02    75.44     3.55 o
   4   5  11    15.23    15.31     6.43 <
  -4   5  11    15.25     3.55     7.10 <
   0   6  11    21.49    19.53     4.22 o
   1   6  11    27.22    16.42     3.33 o
  -1   6  11    27.20    15.98     3.11 o
   2   6  11    32.04    18.64     2.88 o
  -2   6  11    31.97    21.52     3.11 o
   3   6  11     8.74     4.88     3.33 <
  -3   6  11     8.75     4.44     3.77 <
   4   6  11    16.58    18.42     7.32 <
  -4   6  11    16.60    10.43     6.66 <
   2   7  11    44.28    42.16     3.11 o
  -2   7  11    44.31    43.49     3.33 o
   3   7  11    50.90    41.72     4.22 o
  -3   7  11    50.83    40.16     4.44 o
   1   8  11   530.25   517.22    10.43 o
  -1   8  11   530.30   514.12     9.10 o
   2   8  11    22.55    21.97     2.88 o
  -2   8  11    22.58    22.19     3.55 o
   3   8  11    98.91    73.89     4.22 o
  -3   8  11    98.81    75.00     4.44 o
   0   9  11    27.17     5.33     3.33 <
   1   9  11   140.41   146.67     4.44 o
  -1   9  11   140.15   147.11     4.66 o
   2   9  11     4.48     4.44     3.11 <
  -2   9  11     4.46     0.89     3.55 <
   3   9  11    11.58     2.22     4.44 <
  -3   9  11    11.62    12.43     4.66 <
   1  10  11   538.40   503.47     9.76 o
  -1  10  11   538.34   498.58     9.32 o
   2  10  11     7.41    -0.67     3.77 <
  -2  10  11     7.42     2.88     3.77 <
   3  10  11    47.93    64.13     4.88 o
  -3  10  11    48.01    59.02     5.55 o
   0  11  11     3.71     1.11     4.22 <
   1  11  11    19.24    20.41     3.55 o
  -1  11  11    19.30    17.75     3.99 o
   2  11  11     8.01     5.33     3.77 <
  -2  11  11     8.02     7.54     4.22 <
   0  12  11    13.36    31.95     4.44 o
   1  12  11    43.61    67.01     4.44 o
  -1  12  11    43.62    63.90     4.88 o
   2  12  11     3.33     9.54     4.22 <
  -2  12  11     3.32     2.44     4.88 <
   0  13  11     9.22    10.65     4.66 <
   1  13  11    23.46    21.30     4.44 o
  -1  13  11    23.58    23.08     4.88 o
   0  14  11    77.23    60.58     5.55 o
   0   0  12   645.19   769.73    22.19 o
   1   0  12   288.78   307.32     5.10 o
   3   0  12    23.39    12.87     2.44 o
   4   0  12    87.08    89.87     6.66 o
   0   1  12     4.84     2.22     2.88 <
   3   1  12    12.89     9.10     2.66 o
  -3   1  12    12.84    12.20     2.66 o
   4   1  12   615.28   526.99    14.87 o
  -4   1  12   615.26   522.33    14.20 o
   0   2  12 10133.00 11441.90   197.48 o
   1   2  12    61.68    55.92     2.66 o
  -1   2  12    61.69    56.80     2.66 o
   2   2  12    27.22    19.30     2.22 o
  -2   2  12    27.27    15.53     2.44 o
   3   2  12    22.27    25.96     2.66 o
  -3   2  12    22.25    25.74     2.88 o
   4   2  12   158.42   191.93     7.99 o
  -4   2  12   158.40   163.09     7.54 o
   1   3  12    79.63    73.45     2.88 o
  -1   3  12    79.40    69.90     3.33 o
   3   3  12    25.57    24.19     2.88 o
  -3   3  12    25.66    25.52     2.88 o
   4   3  12  2381.64  2443.89    56.14 o
  -4   3  12  2381.45  2351.80    51.92 o
   0   4  12  4535.22  4741.33    83.87 o
   2   4  12     3.07     6.88     2.44 <
  -2   4  12     3.08     1.78     2.66 <
   3   4  12     7.46     0.22     2.88 <
  -3   4  12     7.45     2.22     3.11 <
   0   5  12   170.88   137.13     5.10 o
   2   5  12    24.71    11.76     2.66 o
  -2   5  12    24.73    19.30     3.11 o
   3   5  12    49.94    49.70     3.33 o
  -3   5  12    50.00    44.16     3.55 o
   4   5  12   378.61   332.61    11.09 o
  -4   5  12   378.72   357.02    11.09 o
   2   6  12     8.58     4.22     2.88 <
  -2   6  12     8.55     2.00     3.11 <
   3   6  12     6.61     2.44     3.77 <
  -3   6  12     6.63    11.09     3.77 <
   0   7  12    97.68    97.19     3.99 o
   1   7  12   115.00   103.84     3.99 o
  -1   7  12   115.23    99.85     3.55 o
   2   7  12    17.60    15.98     2.88 o
  -2   7  12    17.60    11.54     3.11 o
   3   7  12    24.57    26.40     3.77 o
  -3   7  12    24.45    29.95     4.22 o
   0   8  12  2970.99  2879.23    54.81 o
   2   8  12     9.13     7.99     2.88 <
  -2   8  12     9.09     8.65     3.55 <
   3   8  12    10.24     8.43     3.99 <
  -3   8  12    10.23     1.78     4.22 <
   0   9  12   181.31   180.84     5.10 o
   1   9  12    95.09    93.19     3.77 o
  -1   9  12    94.97    90.53     4.44 o
   2   9  12     7.34     2.22     3.33 <
  -2   9  12     7.38     1.78     3.77 <
   3   9  12    21.83    13.76     4.44 o
  -3   9  12    21.86    23.74     4.66 o
   0  10  12  1838.46  1845.90    34.84 o
   1  10  12     2.08     4.66     3.55 <
  -1  10  12     2.09     4.22     3.77 <
   2  10  12    22.51    16.86     3.77 o
  -2  10  12    22.60    18.42     3.77 o
   3  10  12     2.14    10.65     4.66 <
  -3  10  12     2.14     4.44     5.77 <
   0  11  12    46.65    47.04     4.44 o
   1  11  12     1.20     0.89     3.55 <
  -1  11  12     1.21     7.32     4.44 <
   2  11  12     2.95     9.54     3.77 <
  -2  11  12     2.94     4.44     4.44 <
   0  12  12    46.66    32.17     4.44 o
   1  12  12     1.33     8.65     4.44 <
  -1  12  12     1.34     5.99     4.88 <
   2  12  12    19.50    20.64     4.44 o
  -2  12  12    19.46     7.54     4.88 <
   0  13  12    27.31    27.96     5.10 o
   1  13  12    21.47    12.87     4.88 <
  -1  13  12    21.45    15.31     5.10 o
   1   0  13     1.98     2.44     2.44 <
   2   0  13     2.08     0.67     2.66 <
   3   0  13    17.87    27.74     2.66 o
   0   1  13  1119.23  1239.03    20.64 o
   1   1  13   119.71   116.05     3.33 o
  -1   1  13   119.50   120.04     3.33 o
   2   1  13    19.20    10.21     2.44 o
  -2   1  13    19.24    10.87     2.44 o
   3   1  13    75.18    75.22     2.88 o
  -3   1  13    75.31    77.22     3.11 o
   4   1  13    51.61    55.25     6.43 o
  -4   1  13    51.57    41.49     5.99 o
   0   2  13    36.64    45.04     3.11 o
   2   2  13    26.35    17.53     2.22 o
  -2   2  13    26.33    17.75     2.44 o
   4   2  13   151.58   175.07     7.54 o
  -4   2  13   151.61   160.87     7.77 o
   0   3  13   321.98   342.60     7.54 o
   2   3  13     4.85    10.21     2.44 o
  -2   3  13     4.87     7.54     2.66 <
   3   3  13   221.28   218.56     5.10 o
  -3   3  13   221.18   219.23     4.66 o
   4   3  13   197.78   171.74     8.43 o
  -4   3  13   197.76   165.09     8.43 o
   0   4  13  1635.61  1786.87    36.39 o
   1   4  13    55.47    55.69     3.11 o
  -1   4  13    55.68    57.69     4.22 o
   2   4  13    12.11     9.76     2.66 o
  -2   4  13    12.11     7.77     3.11 <
   3   4  13    19.57    21.52     2.88 o
  -3   4  13    19.56    14.42     3.55 o
   4   4  13   109.18   111.39     8.43 o
  -4   4  13   109.14    92.75     7.54 o
   0   5  13    53.38    62.57     3.77 o
   1   5  13   247.93   225.66     5.77 o
  -1   5  13   248.04   228.99     6.43 o
   2   5  13    17.06     6.21     3.11 <
  -2   5  13    17.05     2.88     3.33 <
   3   5  13     0.69     0.22     3.11 <
  -3   5  13     0.70    -0.89     3.55 <
   4   5  13   292.30   266.27    11.98 o
  -4   5  13   292.29   260.50     9.76 o
   0   6  13    47.69    30.18     3.33 o
   1   6  13    16.16     5.33     3.33 <
  -1   6  13    16.12     7.10     2.88 <
   2   6  13    13.40    12.65     3.11 o
  -2   6  13    13.41    16.42     3.11 o
   3   6  13     7.52     8.43     3.55 <
  -3   6  13     7.52     4.66     3.77 <
   0   7  13   682.84   662.78    14.42 o
   1   7  13    61.47    44.60     3.55 o
  -1   7  13    61.43    54.58     3.11 o
   2   7  13    53.48    44.60     3.11 o
  -2   7  13    53.55    49.26     3.33 o
   3   7  13     0.90     7.77     3.55 <
  -3   7  13     0.91    14.20     3.99 o
   0   8  13   828.56   856.71    16.20 o
   1   8  13    36.90    17.53     3.33 o
  -1   8  13    36.88    22.41     3.33 o
   2   8  13     4.79     0.44     2.88 <
  -2   8  13     4.80     0.00     3.33 <
   3   8  13    12.06     8.88     4.22 <
  -3   8  13    12.06    11.76     4.44 <
   0   9  13  1514.61  1673.93    29.29 o
   1   9  13    31.17    28.18     3.55 o
  -1   9  13    31.18    30.62     3.33 o
   2   9  13    10.92     8.65     3.55 <
  -2   9  13    10.84     7.32     3.77 <
   3   9  13     1.63     1.78     4.66 <
  -3   9  13     1.63    -0.44     4.88 <
   0  10  13  2417.41  2622.51    43.71 o
   1  10  13     4.24     9.54     3.33 <
  -1  10  13     4.24     1.55     3.77 <
   2  10  13    15.98    11.76     3.55 o
  -2  10  13    15.95     8.65     3.99 <
   0  11  13    23.79    17.75     4.22 o
   1  11  13     6.70    13.09     3.99 o
  -1  11  13     6.69    11.09     4.22 <
   2  11  13    11.70    14.20     3.99 o
  -2  11  13    11.70    13.31     4.44 <
   0  12  13    11.39    10.43     4.66 <
   1  12  13     8.80     7.54     4.44 <
  -1  12  13     8.82     8.88     4.66 <
   2  12  13     3.46     9.76     4.66 <
  -2  12  13     3.47     9.54     4.88 <
   0  13  13    66.15    73.67     5.55 o
   1  13  13     3.76    11.54     4.88 <
  -1  13  13     3.76     2.88     5.33 <
   2   0  14     6.13     9.10     2.66 o
   3   0  14    19.59    16.20     2.66 o
   4   0  14    40.47    39.94     6.21 o
   2   1  14    11.07     6.43     2.44 <
  -2   1  14    11.08     9.32     2.44 o
   3   1  14    40.75    33.06     2.66 o
  -3   1  14    40.75    31.06     3.11 o
   4   1  14    46.31    49.70     6.43 o
  -4   1  14    46.28    41.72     6.66 o
   1   2  14   425.49   375.21     6.66 o
  -1   2  14   425.89   384.53     6.66 o
   3   2  14   168.08   175.29     4.22 o
  -3   2  14   167.77   174.40     4.22 o
   4   2  14   824.21   770.62    20.19 o
  -4   2  14   824.26   768.40    19.53 o
   0   3  14  5335.24  6207.35   124.48 o
   2   3  14    15.01     3.11     2.66 <
  -2   3  14    15.00     6.88     2.88 <
   3   3  14    52.95    53.03     3.11 o
  -3   3  14    53.04    48.59     3.77 o
   4   3  14   286.08   275.14    10.21 o
  -4   3  14   286.22   250.07    10.21 o
   0   4  14   184.69   148.44     6.88 o
   1   4  14     7.76     5.99     3.33 <
  -1   4  14     7.75    10.21     4.44 <
   2   4  14    40.35    26.18     2.88 o
  -2   4  14    40.47    27.51     3.33 o
   3   4  14    23.04    12.65     2.88 o
  -3   4  14    23.13    13.76     3.55 o
   4   4  14   823.07   741.33    23.52 o
  -4   4  14   823.16   731.57    19.75 o
   0   5  14   391.80   343.93     9.10 o
   1   5  14    14.58    17.09     2.88 o
  -1   5  14    14.62    15.98     3.55 o
   2   5  14     0.95    -2.22     3.33 <
  -2   5  14     0.95     3.99     3.33 <
   3   5  14     2.40     3.99     3.33 <
  -3   5  14     2.40     4.22     3.55 <
   0   6  14    20.70     3.55     3.11 <
   3   6  14    18.97     8.43     3.55 <
  -3   6  14    18.99    12.43     3.99 o
   0   7  14   137.22   117.60     4.44 o
   1   7  14    73.01    72.11     3.77 o
  -1   7  14    73.03    63.90     3.55 o
   2   7  14    19.28    12.87     3.11 o
  -2   7  14    19.27     5.33     3.55 <
   3   7  14    16.95    14.64     3.77 o
  -3   7  14    16.93    13.76     3.99 o
   0   8  14    88.00    94.75     4.44 o
   1   8  14   160.57   188.61     5.10 o
  -1   8  14   160.48   173.29     4.66 o
   2   8  14    17.60    20.86     3.11 o
  -2   8  14    17.58    18.19     3.55 o
   3   8  14    20.98    29.29     4.22 o
  -3   8  14    21.01    25.74     4.66 o
   0   9  14  2469.13  2360.68    40.83 o
   1   9  14   108.41   103.62     4.22 o
  -1   9  14   108.51   102.29     3.99 o
   2   9  14    16.80    13.76     3.55 o
  -2   9  14    16.82     9.76     3.99 <
   3   9  14     0.31     1.78     4.44 <
  -3   9  14     0.31     3.77     4.66 <
   0  10  14   208.27   235.42     6.66 o
   1  10  14     4.16     5.77     3.33 <
  -1  10  14     4.14    -0.44     4.22 <
   2  10  14    12.66    15.31     3.55 o
  -2  10  14    12.70    14.20     4.44 o
   0  11  14   241.41   248.96     6.88 o
   1  11  14    17.64    18.64     4.22 o
  -1  11  14    17.62    16.42     4.44 o
   2  11  14     3.49    -1.33     3.99 <
  -2  11  14     3.48     2.00     4.88 <
   0  12  14    51.31    54.36     5.10 o
   1  12  14    97.59    80.55     4.88 o
  -1  12  14    97.52    77.00     5.33 o
   2  12  14    14.24    13.54     4.88 <
  -2  12  14    14.23    19.30     5.33 o
   0  13  14    19.90    19.75     5.10 o
   1  13  14     2.32     8.65     5.10 <
  -1  13  14     2.29    -3.33     5.33 <
   1   0  15     0.63     3.11     2.88 <
   2   0  15    54.10    45.93     2.88 o
   3   0  15     3.03    -4.66     2.88 <
   4   0  15     1.18    -0.67     5.99 <
   1   1  15   526.14   523.44     9.76 o
  -1   1  15   526.29   548.51     9.32 o
   2   1  15    37.88    25.52     2.88 o
  -2   1  15    37.93    30.18     2.88 o
   3   1  15   367.75   356.35     5.99 o
  -3   1  15   367.56   360.35     6.66 o
   4   1  15     1.54     5.99     6.43 <
  -4   1  15     1.56     9.76     6.66 <
   0   2  15    71.64    53.70     3.55 o
   1   2  15   524.28   560.71    10.21 o
  -1   2  15   524.04   560.49    10.21 o
   3   2  15   951.12   937.92    15.75 o
  -3   2  15   951.04   950.13    14.64 o
   4   2  15    28.25    24.63     6.21 o
  -4   2  15    28.31    23.52     7.32 o
   0   3  15   199.14   169.97     6.43 o
   1   3  15   535.01   609.53    13.54 o
  -1   3  15   535.09   629.28    13.54 o
   2   3  15    16.61     8.43     2.66 o
  -2   3  15    16.63    12.20     3.55 o
   3   3  15    96.59   111.17     3.99 o
  -3   3  15    96.63   107.62     4.44 o
   4   3  15    23.09    30.84     7.54 o
  -4   3  15    23.14    34.61     7.32 o
   0   4  15   201.98   206.80     7.10 o
   1   4  15   145.97   173.96     5.10 o
  -1   4  15   145.94   170.19     6.43 o
   2   4  15    14.48     2.44     2.88 <
  -2   4  15    14.46     6.88     3.33 <
   3   4  15   217.74   184.17     4.66 o
  -3   4  15   217.74   189.05     5.10 o
   4   4  15    31.08    28.40     7.99 o
  -4   4  15    31.07    19.97     7.54 <
   0   5  15     0.18     4.22     3.55 <
   1   5  15   232.11   223.89     5.55 o
  -1   5  15   231.90   215.01     5.10 o
   2   5  15     0.73     7.10     3.33 <
  -2   5  15     0.72     9.99     3.11 o
   3   5  15    26.04    31.29     3.55 o
  -3   5  15    25.99    24.41     3.77 o
   0   6  15     0.11     2.00     3.11 <
   1   6  15   384.93   345.92     7.54 o
  -1   6  15   384.78   343.04     7.10 o
   2   6  15     9.28    13.76     3.11 o
  -2   6  15     9.25    14.64     3.33 o
   3   6  15     6.93     3.99     3.55 <
  -3   6  15     6.88     5.77     3.77 <
   0   7  15     5.47    -0.22     3.33 <
   1   7  15   632.53   555.17    10.43 o
  -1   7  15   632.02   558.27    11.98 o
   2   7  15     7.17     4.88     2.88 <
  -2   7  15     7.16     3.77     3.77 <
   3   7  15    65.10    49.04     3.99 o
  -3   7  15    65.22    49.04     4.66 o
   0   8  15    25.00     9.32     3.77 <
   1   8  15   492.08   537.86    11.54 o
  -1   8  15   492.21   515.01     9.76 o
   2   8  15    12.90    14.64     3.33 o
  -2   8  15    12.90    11.32     3.55 o
   3   8  15   102.97   105.18     4.66 o
  -3   8  15   103.05   101.62     5.10 o
   0   9  15   143.81   136.02     5.10 o
   1   9  15   535.40   558.94    11.54 o
  -1   9  15   535.99   517.67    10.21 o
   2   9  15     6.09    10.65     3.77 <
  -2   9  15     6.07     5.10     4.44 <
   3   9  15    50.66    55.92     4.66 o
  -3   9  15    50.57    62.57     4.88 o
   0  10  15    22.24    29.73     4.44 o
   1  10  15    47.86    42.82     3.77 o
  -1  10  15    47.92    45.49     4.22 o
   2  10  15     4.40     7.54     3.55 <
  -2  10  15     4.39     4.22     4.44 <
   1  11  15    62.02    69.01     4.66 o
  -1  11  15    61.93    63.46     4.66 o
   2  11  15     2.88     0.67     3.99 <
  -2  11  15     2.87     5.10     5.10 <
   0  12  15    29.62    35.50     5.10 o
   1  12  15    85.39    76.33     5.10 o
  -1  12  15    85.41    82.99     5.77 o
   0  13  15    40.42    30.62     5.33 o
   1  13  15    29.29    34.17     5.33 o
  -1  13  15    29.26    36.17     5.55 o
   2   0  16    38.43    26.85     3.11 o
   3   0  16   206.93   197.04     4.66 o
   4   0  16    13.37    10.65     6.66 <
   0   1  16     9.32    13.09     4.44 <
   1   1  16   782.05   829.42    15.98 o
  -1   1  16   781.37   834.30    15.98 o
   3   1  16   575.93   580.02    10.65 o
  -3   1  16   576.01   589.56     9.99 o
   4   1  16    31.46    26.18     6.66 o
  -4   1  16    31.49    26.85     7.10 o
   0   2  16     0.27     2.66     3.77 <
   1   2  16   804.46   750.21    14.87 o
  -1   2  16   804.11   770.18    15.53 o
   2   2  16    29.63    18.64     3.11 o
  -2   2  16    29.74     9.54     3.55 <
   3   2  16   604.64   647.47    11.76 o
  -3   2  16   605.08   650.14    10.21 o
   4   2  16    62.92    81.88     7.32 o
  -4   2  16    62.83    67.01     7.77 o
   0   3  16   688.23   611.75    17.31 o
   1   3  16   603.67   584.01    11.98 o
  -1   3  16   603.98   589.78    12.87 o
   2   3  16    18.24     5.10     3.11 <
  -2   3  16    18.22    17.09     3.99 o
   3   3  16   344.05   317.74     6.66 o
  -3   3  16   343.85   307.98     6.88 o
   4   3  16    77.07    79.44     7.99 o
  -4   3  16    76.99    70.34     7.77 o
   0   4  16   342.70   284.24     7.54 o
   2   4  16    60.53    55.03     3.33 o
  -2   4  16    60.65    58.13     3.55 o
   3   4  16   215.23   189.94     5.10 o
  -3   4  16   215.07   197.48     5.33 o
   0   5  16    19.87    -0.89     3.55 <
   1   5  16   419.46   399.18     7.77 o
  -1   5  16   419.91   385.42     7.54 o
   2   5  16    10.83    11.54     3.11 o
  -2   5  16    10.85     3.77     2.88 <
   3   5  16    91.11    89.87     3.77 o
  -3   5  16    91.20    90.75     4.22 o
   0   6  16    10.67    -1.78     3.33 <
   1   6  16   313.01   282.91     6.43 o
  -1   6  16   313.18   291.34     6.43 o
   2   6  16    76.77    78.11     3.77 o
  -2   6  16    76.67    81.88     3.77 o
   3   6  16    30.43    29.73     3.55 o
  -3   6  16    30.48    29.07     3.77 o
   0   7  16     6.12     7.99     3.33 <
   1   7  16   312.86   347.92     7.54 o
  -1   7  16   313.05   347.70     7.99 o
   2   7  16    10.09    17.31     3.33 o
  -2   7  16    10.08    17.09     3.55 o
   3   7  16    70.10    53.92     3.99 o
  -3   7  16    70.06    50.15     4.44 o
   0   8  16     6.71    14.87     3.99 o
   1   8  16   568.44   603.09    11.98 o
  -1   8  16   568.80   584.46    11.09 o
   2   8  16     1.01     1.33     3.33 <
  -2   8  16     1.00    -3.55     3.55 <
   3   8  16    45.25    57.25     4.22 o
  -3   8  16    45.18    56.36     5.10 o
   0   9  16   147.47   122.04     4.88 o
   1   9  16   503.23   532.53    11.32 o
  -1   9  16   502.64   506.57     9.32 o
   2   9  16     0.42     4.22     3.55 <
  -2   9  16     0.42     4.44     4.22 <
   3   9  16    83.07    97.63     5.10 o
  -3   9  16    83.15    85.87     5.55 o
   0  10  16     3.13     6.43     3.77 <
   1  10  16   233.58   239.86     6.21 o
  -1  10  16   233.23   227.66     6.21 o
   2  10  16     5.70    14.87     3.77 o
  -2  10  16     5.71    13.76     4.66 <
   0  11  16     0.74    10.65     4.44 <
   1  11  16   389.55   375.21     8.65 o
  -1  11  16   389.69   401.84     9.76 o
   2  11  16     9.50    10.21     3.99 <
  -2  11  16     9.50     7.54     5.10 <
   0  12  16    18.70    26.40     5.10 o
   1  12  16    83.35    88.76     5.33 o
  -1  12  16    83.44    73.22     5.55 o
   0  13  16    45.21    35.06     5.99 o
   1   0  17   237.46   220.56     6.66 o
   4   0  17    17.39     8.88     6.66 <
   0   1  17    30.51    14.64     4.44 o
   1   1  17   333.79   381.43     8.88 o
  -1   1  17   333.69   382.98     8.65 o
   2   1  17    20.93    18.42     3.55 o
  -2   1  17    20.93    15.75     3.55 o
   3   1  17   304.85   326.18     6.88 o
  -3   1  17   305.01   350.36     7.54 o
   4   1  17     4.89     3.11     6.66 <
  -4   1  17     4.91     4.44     7.10 <
   0   2  17    68.57    51.92     3.77 o
   1   2  17    89.64    98.07     4.66 o
  -1   2  17    89.98   100.74     4.66 o
   2   2  17     7.68    10.43     3.11 o
  -2   2  17     7.68    13.54     3.55 o
   3   2  17   168.34   176.62     5.33 o
  -3   2  17   168.28   183.50     5.33 o
   4   2  17     1.45    -0.89     6.66 <
  -4   2  17     1.45     2.88     7.32 <
   0   3  17    25.10     6.21     4.22 <
   1   3  17    17.42    17.09     3.33 o
  -1   3  17    17.49    27.29     3.77 o
   2   3  17     4.61     8.43     3.11 <
  -2   3  17     4.57     8.65     3.55 <
   3   3  17   264.45   231.43     5.99 o
  -3   3  17   264.27   249.18     6.43 o
   1   4  17   509.93   479.06     9.32 o
  -1   4  17   509.88   476.17     9.10 o
   2   4  17    10.69    12.87     2.88 o
  -2   4  17    10.63    15.09     3.33 o
   3   4  17    43.93    36.61     3.55 o
  -3   4  17    43.93    39.50     3.77 o
   0   5  17     0.54     8.21     3.33 <
   1   5  17   295.03   274.03     5.99 o
  -1   5  17   295.08   263.60     5.77 o
   2   5  17     6.58     2.66     3.11 <
  -2   5  17     6.51     7.99     3.11 <
   3   5  17    19.18    23.30     3.33 o
  -3   5  17    19.20    25.07     3.77 o
   1   6  17    79.26    58.13     3.55 o
  -1   6  17    79.24    56.80     3.99 o
   2   6  17    68.27    64.35     3.55 o
  -2   6  17    68.32    65.46     3.33 o
   3   6  17    73.82    70.34     3.99 o
  -3   6  17    73.81    79.21     4.44 o
   0   7  17    10.29     2.22     3.77 <
   1   7  17   185.35   185.06     5.33 o
  -1   7  17   185.31   180.17     5.77 o
   3   7  17    22.96    22.41     3.99 o
  -3   7  17    22.95    22.63     4.22 o
   0   8  17    44.81    45.27     3.99 o
   1   8  17   314.40   317.74     7.10 o
  -1   8  17   314.11   314.64     7.32 o
   2   8  17     3.97     2.66     3.55 <
  -2   8  17     4.01     6.66     3.77 <
   3   8  17    22.74    27.07     4.22 o
  -3   8  17    22.76    27.74     5.10 o
   0   9  17    54.96    45.93     4.22 o
   1   9  17    37.93    37.94     3.99 o
  -1   9  17    37.88    37.28     3.55 o
   2   9  17    10.35    15.75     3.77 o
  -2   9  17    10.32    17.31     4.22 o
   0  10  17     2.49     8.21     4.22 <
   1  10  17   328.04   310.42     7.54 o
  -1  10  17   328.45   286.90     7.10 o
   2  10  17     0.47     1.11     3.77 <
  -2  10  17     0.47    -2.66     4.66 <
   0  11  17     0.34    -2.44     4.88 <
   1  11  17   430.38   431.80     9.54 o
  -1  11  17   430.45   434.24    10.87 o
   2  11  17     1.40     6.66     4.22 <
  -2  11  17     1.39     2.88     5.33 <
   0  12  17     2.40    -4.22     5.10 <
   1  12  17    70.36    77.22     5.33 o
  -1  12  17    70.21    66.12     5.55 o
   1   0  18    57.91    31.73     4.44 o
   2   0  18   126.38   118.49     4.44 o
   3   0  18     0.87    -7.10     3.77 <
   0   1  18     9.78     0.67     4.66 <
   1   1  18    97.24   105.84     4.66 o
  -1   1  18    97.25   104.51     4.22 o
   2   1  18   843.38   885.78    16.20 o
  -2   1  18   843.42   921.73    14.87 o
   3   1  18    67.36    79.44     3.99 o
  -3   1  18    67.28    79.88     4.44 o
   0   2  18     0.08     0.00     3.33 <
   1   2  18    55.35    37.28     3.55 o
  -1   2  18    55.36    36.61     3.77 o
   2   2  18    64.49    58.13     3.11 o
  -2   2  18    64.47    63.46     3.55 o
   3   2  18     5.15     9.99     3.99 <
  -3   2  18     5.15    -2.00     3.77 <
   0   3  18     4.06     7.77     3.11 <
   1   3  18    41.87    40.61     3.11 o
  -1   3  18    41.79    33.95     3.11 o
   3   3  18    64.29    50.37     3.99 o
  -3   3  18    64.47    46.15     3.99 o
   0   4  18   132.80   121.82     4.66 o
   1   4  18    85.51    91.64     3.33 o
  -1   4  18    85.77    88.09     3.77 o
   2   4  18    57.91    55.25     3.11 o
  -2   4  18    57.89    60.13     3.55 o
   3   4  18    11.47     6.43     3.77 <
  -3   4  18    11.50     9.99     3.77 <
   0   5  18     8.37     9.54     3.33 <
   1   5  18    10.34    15.98     3.33 o
  -1   5  18    10.26     9.32     3.33 <
   2   5  18   310.31   285.79     5.77 o
  -2   5  18   310.37   288.23     5.33 o
   3   5  18    39.09    26.40     3.55 o
  -3   5  18    39.11    31.51     4.22 o
   0   6  18     2.45     2.44     3.99 <
   1   6  18    51.52    44.16     3.55 o
  -1   6  18    51.35    37.94     3.99 o
   2   6  18    16.07    11.54     3.33 o
  -2   6  18    16.09    13.98     3.33 o
   3   6  18    11.93     5.10     3.77 <
  -3   6  18    11.89    12.87     4.44 <
   0   7  18     9.78     9.54     3.99 <
   1   7  18    46.40    33.51     3.77 o
  -1   7  18    46.47    25.74     3.99 o
   2   7  18   653.13   626.84    11.98 o
  -2   7  18   653.20   635.27    11.09 o
   3   7  18    11.48    11.32     3.77 <
  -3   7  18    11.43    17.31     4.44 o
   0   8  18    59.56    58.58     4.66 o
   1   8  18    21.57    21.75     3.99 o
  -1   8  18    21.51    23.74     3.99 o
   2   8  18   137.44   125.81     4.66 o
  -2   8  18   137.48   118.93     4.88 o
   3   8  18     2.53     5.77     3.99 <
  -3   8  18     2.54     6.88     5.10 <
   0   9  18     2.21     4.88     4.22 <
   1   9  18   118.38   100.96     4.66 o
  -1   9  18   118.33    97.19     4.88 o
   2   9  18    24.49    28.40     3.99 o
  -2   9  18    24.47    18.86     4.44 o
   0  10  18     0.04     2.88     4.44 <
   1  10  18    66.80    62.79     4.88 o
  -1  10  18    66.84    65.01     4.88 o
   2  10  18     4.57    -2.44     3.99 <
  -2  10  18     4.58     2.22     4.88 <
   0  11  18    23.57    26.18     4.88 o
   1  11  18    77.88    72.34     5.10 o
  -1  11  18    77.89    69.23     5.55 o
   2  11  18   181.32   162.42     5.99 o
  -2  11  18   181.12   157.99     7.10 o
   0  12  18    23.29    27.74     5.33 o
   1  12  18    26.83    37.72     5.10 o
  -1  12  18    26.84    21.52     5.55 o
   1   0  19     0.46    -1.55     3.33 <
   2   0  19  4191.18  4419.14    67.45 o
   3   0  19     0.11     6.21     4.44 <
   1   1  19    72.12    66.12     3.77 o
  -1   1  19    72.11    58.58     3.55 o
   2   1  19  1885.55  1961.50    32.17 o
  -2   1  19  1884.96  2020.74    28.62 o
   3   1  19    52.21    38.16     3.77 o
  -3   1  19    52.11    38.61     4.22 o
   0   2  19     1.83     0.67     3.11 <
   1   2  19    23.79    13.98     3.33 o
  -1   2  19    23.80    11.54     3.11 o
   2   2  19   952.07   944.58    14.64 o
  -2   2  19   952.26   957.01    14.64 o
   3   2  19     7.94    12.20     3.99 o
  -3   2  19     7.95    12.65     3.77 o
   2   3  19    87.74    74.11     3.33 o
  -2   3  19    87.70    82.54     3.77 o
   3   3  19     9.55     6.88     3.77 <
  -3   3  19     9.60     1.11     3.77 <
   0   4  19     3.02    -2.00     3.99 <
   1   4  19   105.63   108.50     3.55 o
  -1   4  19   105.50   105.62     3.99 o
  -2   4  19   296.75   264.05     5.99 o
   3   4  19    58.64    54.81     3.99 o
  -3   4  19    58.69    58.80     3.99 o
   0   5  19     0.04     3.77     3.55 <
   1   5  19     6.46     7.54     3.33 <
  -1   5  19     6.41     4.44     3.55 <
   2   5  19   249.19   249.18     5.10 o
  -2   5  19   249.37   250.74     5.10 o
   3   5  19     7.15     4.44     3.55 <
  -3   5  19     7.18     9.10     4.44 <
   0   6  19    56.00    37.94     3.99 o
   1   6  19    23.81    15.53     3.55 o
  -1   6  19    23.79    18.86     3.77 o
   2   6  19  1205.96  1143.39    18.86 o
  -2   6  19  1205.79  1109.00    16.64 o
   3   6  19     5.00     6.66     3.77 <
  -3   6  19     5.02     6.66     4.66 <
   0   7  19    23.89    22.85     4.44 o
   1   7  19    41.63    28.40     3.77 o
  -1   7  19    41.73    30.18     4.22 o
   2   7  19   179.89   198.15     5.55 o
  -2   7  19   179.65   201.25     5.33 o
   3   7  19    43.85    37.50     3.99 o
  -3   7  19    43.82    45.71     4.66 o
   0   8  19    42.66    25.96     3.99 o
   1   8  19    15.94    15.31     4.22 o
  -1   8  19    15.99    13.76     3.99 o
   2   8  19   484.76   497.92     9.32 o
  -2   8  19   484.94   481.94     9.10 o
   0   9  19     2.73     2.66     4.22 <
   1   9  19    10.21    16.20     4.22 o
  -1   9  19    10.20    23.08     4.88 o
   2   9  19     4.92     1.78     3.77 <
  -2   9  19     4.90     7.99     4.44 <
   0  10  19     2.13    -1.33     4.44 <
   1  10  19    10.16     4.66     4.66 <
  -1  10  19    10.15     9.10     4.66 <
   2  10  19    48.14    35.06     4.44 o
  -2  10  19    48.28    25.96     5.33 o
   0  11  19    11.48    14.20     4.66 o
   1  11  19     1.35     5.10     4.44 <
  -1  11  19     1.35     3.33     5.10 <
   0  12  19    23.15    19.53     5.33 o
   1  12  19     3.47    13.76     5.10 <
  -1  12  19     3.48     5.33     5.55 <
   0   0  20    36.34    24.41     4.66 o
   1   0  20    56.59    47.48     3.55 o
   2   0  20    35.22    37.94     3.55 o
   3   0  20     1.90     3.77     3.99 <
   0   1  20    71.99    72.34     3.99 o
   1   1  20    89.86    79.88     3.99 o
  -1   1  20    89.92    75.66     3.55 o
   2   1  20   366.55   365.67     7.10 o
  -2   1  20   366.62   361.46     6.43 o
   3   1  20    15.37    22.63     3.77 o
  -3   1  20    15.33    22.85     3.77 o
   0   2  20     0.07     6.21     3.33 <
   1   2  20    78.49    60.35     3.77 o
  -1   2  20    78.60    65.46     3.55 o
   2   2  20   569.19   610.86    10.43 o
  -2   2  20   569.34   611.08     9.76 o
   3   2  20    45.66    51.26     4.22 o
  -3   2  20    45.52    47.48     4.22 o
   0   3  20    80.73    64.79     3.77 o
   1   3  20    83.04    88.09     3.77 o
  -1   3  20    82.87    90.75     3.99 o
   2   3  20    61.52    55.69     3.33 o
  -2   3  20    61.56    57.47     3.55 o
   3   3  20    16.13     9.54     3.77 <
  -3   3  20    16.15    17.75     4.22 o
   0   4  20     1.67    -2.00     3.55 <
   1   4  20    25.93    15.98     3.11 o
  -1   4  20    26.00    19.97     3.55 o
   2   4  20    33.78    45.27     3.11 o
  -2   4  20    33.68    47.71     3.77 o
   3   4  20    20.22    19.97     3.99 o
  -3   4  20    20.24    12.43     4.44 <
   0   5  20   103.37    93.64     3.99 o
   1   5  20    23.03     3.33     3.55 <
  -1   5  20    23.08     5.33     3.77 <
   3   5  20    19.95    10.65     3.77 <
  -3   5  20    19.97     7.32     4.66 <
   0   6  20     4.93    -0.67     3.99 <
   1   6  20    14.99    19.30     3.55 o
  -1   6  20    14.96    19.53     3.55 o
   2   6  20   291.51   278.69     6.21 o
  -2   6  20   291.84   288.01     5.99 o
   3   6  20    14.80    23.96     3.99 o
  -3   6  20    14.80    24.63     4.66 o
   0   7  20    14.91    10.43     4.22 <
   1   7  20     1.59    -2.00     3.99 <
  -1   7  20     1.59     4.22     3.99 <
   2   7  20   267.96   261.16     6.43 o
  -2   7  20   267.74   252.73     5.99 o
   3   7  20    15.47    23.30     4.22 o
  -3   7  20    15.46    24.63     4.66 o
   0   8  20    49.67    29.95     4.66 o
   1   8  20     0.23     0.22     4.22 <
  -1   8  20     0.23     2.44     4.44 <
   2   8  20   105.87   104.73     4.66 o
  -2   8  20   105.73   104.29     4.88 o
   0   9  20     5.38     8.21     4.66 <
   1   9  20    21.11    25.74     4.66 o
  -1   9  20    21.16    32.62     5.10 o
   2   9  20    36.80    32.17     4.44 o
  -2   9  20    36.78    32.40     4.66 o
   0  10  20     1.51     3.77     4.88 <
   1  10  20     3.23    -1.78     4.88 <
  -1  10  20     3.23     5.99     4.66 <
   2  10  20   238.77   222.78     6.21 o
  -2  10  20   238.58   220.56     6.66 o
   0  11  20    10.45    12.87     5.10 <
   1  11  20    17.89    17.31     4.88 o
  -1  11  20    17.85    19.97     4.88 o
   0  12  20     2.85     4.22     5.77 <
   1   0  21     0.54     2.22     3.55 <
   2   0  21    63.08    71.67     3.99 o
   3   0  21    24.89    15.75     3.99 o
   1   1  21   533.55   568.04    11.09 o
  -1   1  21   533.80   558.05     9.54 o
   2   1  21   290.80   289.34     5.99 o
  -2   1  21   291.07   299.55     5.77 o
   3   1  21    62.21    55.69     4.22 o
  -3   1  21    62.09    61.91     4.66 o
   0   2  21    36.34    20.64     3.55 o
   1   2  21    13.57    12.43     3.55 o
  -1   2  21    13.62    10.43     3.55 <
   2   2  21    51.03    50.37     3.55 o
  -2   2  21    51.01    50.81     3.55 o
   3   2  21    15.98     7.10     3.99 <
  -3   2  21    15.98     6.66     4.44 <
   1   3  21    76.03    78.55     3.55 o
  -1   3  21    76.07    85.21     4.44 o
   2   3  21    34.69    40.16     3.33 o
  -2   3  21    34.72    36.39     3.55 o
   3   3  21    34.14    33.73     3.99 o
  -3   3  21    34.10    29.73     4.44 o
   0   4  21    17.81     0.89     3.77 <
   1   4  21     6.37     8.21     3.55 <
  -1   4  21     6.40     6.66     3.77 <
   2   4  21    13.54    16.86     3.11 o
  -2   4  21    13.62    14.64     3.77 o
   3   4  21     9.07     7.10     3.99 <
  -3   4  21     9.05    10.65     4.22 <
   0   5  21     3.54     3.55     4.22 <
   1   5  21    54.22    36.61     3.77 o
  -1   5  21    54.10    34.61     3.99 o
   2   5  21    59.60    45.04     3.55 o
  -2   5  21    59.48    44.82     3.55 o
   3   5  21    86.61    71.67     4.44 o
  -3   5  21    86.59    80.32     4.88 o
   0   6  21     4.19    -1.33     3.77 <
   1   6  21    63.04    55.25     4.22 o
  -1   6  21    63.10    57.03     3.77 o
   2   6  21    72.31    73.22     3.99 o
  -2   6  21    72.22    73.45     3.99 o
   3   6  21   325.43   309.76     7.32 o
  -3   6  21   325.28   297.33     7.77 o
   0   7  21     1.44     5.55     3.99 <
   1   7  21   101.60    97.85     5.10 o
  -1   7  21   101.70    97.41     4.66 o
   2   7  21    31.07    30.40     4.44 o
  -2   7  21    31.12    25.74     3.99 o
   3   7  21    31.74    35.50     4.44 o
  -3   7  21    31.77    25.30     4.88 o
   0   8  21    13.32    11.32     4.22 <
   1   8  21     8.63     5.55     3.99 <
  -1   8  21     8.56     0.22     4.88 <
   2   8  21     6.23     1.55     4.22 <
  -2   8  21     6.22     3.55     4.22 <
   0   9  21     4.41     3.33     4.88 <
   1   9  21    22.02    27.51     5.10 o
  -1   9  21    21.98    29.95     5.33 o
   2   9  21     8.79    13.09     4.44 <
  -2   9  21     8.78    13.76     4.88 <
   0  10  21     1.05    -0.44     4.88 <
   1  10  21    14.77    20.64     5.10 o
  -1  10  21    14.80    10.87     4.88 <
   2  10  21    90.79   100.52     5.10 o
  -2  10  21    90.78   100.96     5.77 o
   0  11  21     7.29     5.77     5.10 <
   1  11  21    24.61    41.27     4.88 o
  -1  11  21    24.62    30.84     4.88 o
   0   0  22   416.08   434.24    12.20 o
   1   0  22  1965.57  2093.75    32.84 o
   2   0  22    13.93    21.52     3.77 o
   3   0  22   481.75   449.55     9.32 o
   0   1  22    97.00   101.85     4.22 o
   1   1  22  1432.24  1526.82    27.29 o
  -1   1  22  1433.07  1468.91    23.08 o
   2   1  22    11.15    11.32     3.99 <
  -2   1  22    11.11    11.32     3.33 o
   3   1  22   358.10   323.51     7.54 o
  -3   1  22   358.04   329.06     8.21 o
   0   2  22     0.16     6.66     3.55 <
   2   2  22    27.92    35.50     3.33 o
  -2   2  22    27.88    34.61     3.55 o
   3   2  22    42.32    34.61     4.44 o
  -3   2  22    42.35    38.61     4.66 o
   0   3  22    12.58     1.11     3.55 <
   1   3  22    10.04     5.55     3.33 <
  -1   3  22    10.00    10.87     3.99 <
   2   3  22     6.59     6.88     3.33 <
  -2   3  22     6.58     2.66     3.55 <
   3   3  22    25.63    41.27     4.44 o
  -3   3  22    25.66    31.95     4.44 o
   0   4  22     0.11     5.77     4.22 <
   1   4  22    94.22    79.88     3.99 o
  -1   4  22    94.12    71.23     4.22 o
   2   4  22    24.92    15.75     3.33 o
  -2   4  22    24.91    13.98     3.77 o
   3   4  22   183.96   198.15     5.99 o
  -3   4  22   184.02   189.71     5.77 o
   0   5  22    83.32    98.30     4.66 o
   2   5  22    16.70    10.65     3.55 o
  -2   5  22    16.70     4.44     3.77 <
   3   5  22   287.08   267.15     6.88 o
  -3   5  22   286.97   284.68     6.88 o
   0   6  22    33.91    32.84     4.44 o
   1   6  22    75.46    70.12     4.44 o
  -1   6  22    75.58    64.79     3.99 o
   2   6  22    21.16    26.85     3.77 o
  -2   6  22    21.19    30.84     3.77 o
   3   6  22   279.25   278.25     7.10 o
  -3   6  22   279.39   282.46     7.77 o
   0   7  22     1.76     7.77     3.77 <
   1   7  22   193.65   208.35     6.21 o
  -1   7  22   193.58   203.03     5.77 o
   2   7  22     9.65    16.20     4.66 o
  -2   7  22     9.66    12.43     3.99 o
   0   8  22     1.00    11.32     4.44 <
   1   8  22    25.42    27.96     4.66 o
  -1   8  22    25.40    25.96     4.88 o
   2   8  22    24.60    25.74     4.44 o
  -2   8  22    24.58    20.41     4.66 o
   0   9  22     4.74    13.98     4.66 o
   1   9  22    14.38    11.54     4.88 <
  -1   9  22    14.45     5.55     5.10 <
   2   9  22     6.63    11.09     4.66 <
  -2   9  22     6.64     5.33     4.88 <
   0  10  22     2.21    -0.22     4.88 <
   1  10  22     0.46    -4.22     5.10 <
  -1  10  22     0.48     6.21     5.10 <
   0  11  22    12.47    11.54     5.55 <
   1  11  22    37.33    56.36     5.55 o
  -1  11  22    37.27    60.13     5.55 o
   1   0  23  3880.78  4109.83    62.57 o
   2   0  23   197.13   186.83     5.33 o
   3   0  23   362.60   356.80     7.99 o
   0   1  23     1.25     9.32     3.55 <
   1   1  23   208.25   209.68     5.99 o
  -1   1  23   207.89   212.79     5.33 o
   2   1  23     6.59     4.22     3.99 <
  -2   1  23     6.59    15.98     3.55 o
   3   1  23    39.28    30.84     4.44 o
  -3   1  23    39.46    31.29     4.88 o
   0   2  23    13.57     6.43     3.77 <
   1   2  23   332.69   329.06     6.88 o
  -1   2  23   332.60   321.96     6.21 o
   2   2  23    45.69    44.16     3.77 o
  -2   2  23    45.63    41.72     3.99 o
   3   2  23    63.07    68.12     4.66 o
  -3   2  23    63.05    65.68     4.88 o
   0   3  23     3.26    11.54     3.99 <
   1   3  23    21.55    16.86     3.55 o
  -1   3  23    21.54    20.41     3.99 o
   2   3  23    19.06    14.64     3.55 o
  -2   3  23    19.10    15.75     3.77 o
   3   3  23     5.15     6.66     4.44 <
  -3   3  23     5.19     3.11     4.88 <
   0   4  23    50.28    33.73     4.66 o
   1   4  23    97.79    91.20     3.99 o
  -1   4  23    97.72    92.97     4.44 o
   2   4  23     8.98     9.99     3.55 <
  -2   4  23     8.97    14.20     4.22 o
   3   4  23    48.12    42.60     4.44 o
  -3   4  23    48.14    42.60     4.66 o
   0   5  23    13.94    13.31     4.22 o
   1   5  23    25.17    22.85     3.99 o
  -1   5  23    25.20    11.76     4.22 <
   2   5  23    29.12    29.29     3.77 o
  -2   5  23    28.98    23.74     4.22 o
   3   5  23   325.93   331.50     7.77 o
  -3   5  23   325.86   334.61     7.54 o
   0   6  23    56.61    44.82     4.44 o
   1   6  23   337.48   325.29     7.54 o
  -1   6  23   337.50   298.22     6.43 o
   2   6  23    12.20    10.21     3.99 <
  -2   6  23    12.23     6.21     3.77 <
   0   7  23     3.83     7.10     4.22 <
   1   7  23    14.67     6.21     4.44 <
  -1   7  23    14.67    10.21     4.44 <
   2   7  23    24.56    28.62     4.66 o
  -2   7  23    24.65    21.97     4.44 o
   0   8  23    43.77    30.62     4.88 o
   1   8  23    44.60    45.93     4.88 o
  -1   8  23    44.61    35.72     4.88 o
   2   8  23     4.57     3.33     4.66 <
  -2   8  23     4.54     7.77     4.88 <
   0   9  23     0.19    -0.22     5.10 <
   1   9  23    11.71    12.43     5.33 <
  -1   9  23    11.70    12.20     5.10 <
   2   9  23    18.92    24.63     4.66 o
  -2   9  23    18.93    28.40     5.33 o
   0  10  23     9.76     4.44     5.55 <
   1  10  23     4.81    10.87     5.10 <
  -1  10  23     4.76    -3.11     5.10 <
   0  11  23     1.92     2.00     5.55 <
   0   0  24  2023.26  2334.72    58.13 o
   2   0  24     3.20     0.89     4.22 <
   3   0  24    42.14    29.73     4.44 o
   0   1  24    61.47    67.68     4.22 o
   1   1  24    11.70    16.86     4.22 o
  -1   1  24    11.68    11.98     3.77 o
   2   1  24    17.69    24.85     3.99 o
  -2   1  24    17.64    30.40     3.77 o
   3   1  24     8.71    10.43     4.44 <
  -3   1  24     8.71    10.87     4.88 <
   0   2  24    65.14    54.14     4.44 o
   1   2  24    18.55    11.09     3.77 <
  -1   2  24    18.60     8.88     3.33 <
   2   2  24     3.45     6.43     3.77 <
  -2   2  24     3.43     2.00     3.77 <
   3   2  24     1.77     8.88     4.66 <
  -3   2  24     1.76     6.43     4.66 <
   0   3  24     9.55     7.99     4.22 <
   1   3  24    26.37    21.97     3.55 o
  -1   3  24    26.36    13.54     3.77 o
   2   3  24     2.96    -2.00     3.55 <
  -2   3  24     2.96    -2.00     4.44 <
   3   3  24     0.90     7.99     4.66 <
  -3   3  24     0.91    -2.44     4.88 <
   1   4  24    61.56    45.93     3.77 o
  -1   4  24    61.75    43.93     4.22 o
   2   4  24    10.44     7.54     3.77 <
  -2   4  24    10.43     9.10     4.22 <
   3   4  24     5.88     5.33     4.44 <
  -3   4  24     5.87     2.22     4.66 <
   0   5  24     2.32     3.99     3.99 <
   1   5  24     9.83     0.00     4.22 <
  -1   5  24     9.88     7.10     4.44 <
   2   5  24     1.79     2.22     3.77 <
  -2   5  24     1.79     9.10     4.44 <
   0   6  24   163.19   145.12     5.33 o
   1   6  24   109.82    99.18     4.88 o
  -1   6  24   109.74    96.97     4.66 o
   2   6  24     6.06    13.54     4.22 o
  -2   6  24     6.07    11.54     4.44 <
   0   7  24     0.03     3.99     4.44 <
   1   7  24    25.26    25.30     4.88 o
  -1   7  24    25.21    25.74     4.44 o
   2   7  24     2.19    -2.22     4.66 <
  -2   7  24     2.20    -0.44     4.66 <
   0   8  24     8.32    10.43     4.88 <
   1   8  24     4.01     3.33     4.88 <
  -1   8  24     3.98     7.54     4.66 <
   2   8  24     3.46     6.21     4.88 <
  -2   8  24     3.48    -2.00     4.88 <
   0   9  24     0.15     2.00     5.10 <
   1   9  24     4.11    10.21     5.55 <
  -1   9  24     4.12     7.54     5.33 <
   0  10  24     0.05    11.32     5.55 <
   1  10  24     2.21    -0.44     5.33 <
  -1  10  24     2.21    -2.22     5.99 <
   1   0  25    87.53    66.57     4.44 o
   2   0  25    11.29    11.76     4.22 <
   3   0  25     0.97    -0.22     4.66 <
   0   1  25   429.20   478.61     9.32 o
   1   1  25    45.97    50.81     4.88 o
  -1   1  25    46.04    48.59     3.99 o
   2   1  25    59.79    47.26     4.44 o
  -2   1  25    59.92    47.48     4.22 o
   3   1  25     3.55    10.87     4.66 <
  -3   1  25     3.53    10.65     4.88 <
   1   2  25    28.91    30.18     3.77 o
  -1   2  25    29.01    23.52     3.55 o
   2   2  25    88.14    88.31     4.66 o
  -2   2  25    88.11    84.76     4.44 o
   3   2  25     1.83     7.32     4.66 <
  -3   2  25     1.81     1.55     4.88 <
   0   3  25   268.32   257.17     7.10 o
   1   3  25   107.89    96.52     4.22 o
  -1   3  25   107.96   108.28     4.44 o
   2   3  25    12.67    13.09     3.99 o
  -2   3  25    12.65    17.09     4.66 o
   3   3  25    16.53    12.43     4.88 <
  -3   3  25    16.56    17.09     5.10 o
   0   4  25    32.48    10.65     4.66 <
   1   4  25    17.62     5.99     3.77 <
  -1   4  25    17.65     0.22     4.44 <
   2   4  25    15.27     9.99     3.77 <
  -2   4  25    15.30    22.19     4.44 o
   0   5  25   234.42   222.33     6.43 o
   1   5  25    39.22    33.28     4.22 o
  -1   5  25    39.27    40.83     4.88 o
   2   5  25     8.88    12.65     4.22 <
  -2   5  25     8.87     9.76     4.66 <
   0   6  25    86.67    76.55     4.66 o
   1   6  25     9.25     3.77     4.44 <
  -1   6  25     9.19     1.33     4.22 <
   2   6  25    19.44    21.30     4.22 o
  -2   6  25    19.47    29.73     4.66 o
   0   7  25    23.93    34.39     5.10 o
   1   7  25     7.65    -7.10     4.66 <
  -1   7  25     7.58     2.88     4.44 <
   2   7  25     1.12    -2.66     4.44 <
  -2   7  25     1.13    -8.21     4.88 <
   0   8  25   102.87   127.81     5.77 o
   1   8  25     2.82    11.09     5.10 <
  -1   8  25     2.83     6.88     4.88 <
   2   8  25     3.12     8.88     4.66 <
  -2   8  25     3.10     7.54     5.10 <
   0   9  25     0.34     0.00     5.55 <
   1   9  25    13.33    13.09     5.55 <
  -1   9  25    13.34    12.43     5.55 <
   0  10  25     4.37    -2.66     5.77 <
   1   0  26    13.58    24.85     4.44 o
   2   0  26     1.83    11.09     4.44 <
   3   0  26     6.01    12.20     4.66 <
   0   1  26  5478.96  5993.45    92.31 o
   1   1  26    45.19    38.39     4.88 o
  -1   1  26    45.08    45.04     4.44 o
   2   1  26     6.81     6.66     4.44 <
  -2   1  26     6.81     2.66     4.22 <
   3   1  26     6.37    11.09     4.88 <
  -3   1  26     6.37     8.88     5.10 <
   0   2  26    20.16    11.76     4.66 <
   1   2  26    12.42    15.53     4.22 o
  -1   2  26    12.38    12.65     3.55 o
   2   2  26     3.09     8.88     4.22 <
  -2   2  26     3.08     1.33     4.66 <
   3   2  26     3.03    12.87     4.88 <
  -3   2  26     3.02     7.32     5.10 <
   0   3  26    95.26    83.65     4.88 o
   1   3  26    23.50    15.98     3.99 o
  -1   3  26    23.47    15.31     3.99 o
   2   3  26     3.42     6.88     4.44 <
  -2   3  26     3.43     7.54     4.88 <
   0   4  26    78.72    57.25     4.66 o
   1   4  26    13.46     9.99     3.99 <
  -1   4  26    13.50     9.10     4.44 <
   2   4  26    16.56    23.74     4.22 o
  -2   4  26    16.56    26.63     4.88 o
   0   5  26   523.64   517.00    10.87 o
   1   5  26    14.54    12.65     4.22 <
  -1   5  26    14.54    17.09     4.88 o
   2   5  26    10.97    11.32     4.22 <
  -2   5  26    10.93    18.64     4.88 o
   0   6  26    24.84    28.40     4.66 o
   1   6  26     0.70    -1.55     4.44 <
  -1   6  26     0.70     5.99     4.66 <
   2   6  26     2.56    10.43     4.44 <
  -2   6  26     2.56     7.32     4.88 <
   0   7  26   494.45   513.90    11.54 o
   1   7  26     4.66    -2.66     4.88 <
  -1   7  26     4.66     8.65     4.66 <
   2   7  26     8.19    14.64     4.66 o
  -2   7  26     8.21     9.76     4.88 <
   0   8  26    23.42    42.16     5.33 o
   1   8  26     7.22    15.09     5.55 <
  -1   8  26     7.23     7.10     4.88 <
   0   9  26    25.48    29.95     5.55 o
   1   9  26     1.75    -2.88     5.77 <
  -1   9  26     1.75    -3.77     5.77 <
   1   0  27     6.58     1.11     4.66 <
   2   0  27    38.17    33.73     4.44 o
   0   1  27   171.73   192.60     6.21 o
   1   1  27    18.57    20.19     4.88 o
  -1   1  27    18.51    23.08     4.44 o
   2   1  27    52.54    51.92     4.66 o
  -2   1  27    52.61    56.14     4.88 o
   0   2  27   734.90   787.04    14.42 o
   1   2  27   125.51   124.92     5.33 o
  -1   2  27   125.32   130.91     5.10 o
   2   2  27     7.82    20.19     4.66 o
  -2   2  27     7.78     3.55     4.88 <
   0   3  27     0.63     1.33     4.88 <
   1   3  27    28.84    36.39     4.66 o
  -1   3  27    28.77    34.17     4.88 o
   2   3  27     1.07     4.22     4.44 <
  -2   3  27     1.05     4.44     4.88 <
   0   4  27    50.36    40.38     4.88 o
   1   4  27    21.12    11.32     4.44 <
  -1   4  27    21.19    11.54     4.66 <
   2   4  27    14.81     2.22     4.66 <
  -2   4  27    14.85    13.31     4.88 <
   0   5  27    40.77    40.16     4.88 o
   1   5  27    50.97    54.14     4.22 o
  -1   5  27    50.94    50.59     5.10 o
   2   5  27     0.89     7.99     4.88 <
  -2   5  27     0.87     8.21     5.10 <
   0   6  27    13.80     5.55     4.66 <
   1   6  27     2.50    -3.33     4.66 <
  -1   6  27     2.48     9.99     4.66 <
   2   6  27     5.88    11.54     4.44 <
  -2   6  27     5.86    16.86     5.10 o
   0   7  27    96.50    93.86     5.77 o
   1   7  27     4.70     5.99     5.10 <
  -1   7  27     4.74    13.09     4.88 <
   0   8  27    56.92    66.79     5.77 o
   1   8  27    11.10    13.09     5.55 <
  -1   8  27    11.13    17.09     5.10 o
   0   9  27    15.29     7.77     5.77 <
   0   0  28    19.02     6.21     6.21 <
   1   0  28    85.79    61.02     5.55 o
   2   0  28     4.73    14.20     4.88 <
   0   1  28    19.40    13.31     4.66 <
   1   1  28   237.75   289.79     8.21 o
  -1   1  28   237.76   280.25     7.32 o
   2   1  28    13.20    27.51     4.88 o
  -2   1  28    13.21    17.31     5.10 o
   0   2  28    40.49    32.62     4.88 o
   1   2  28   249.79   285.57     8.21 o
  -1   2  28   249.71   286.02     7.54 o
   2   2  28    10.08    21.30     4.66 o
  -2   2  28    10.08    10.21     5.10 <
   0   3  28    10.80     6.66     4.88 <
   1   3  28   296.64   317.97     8.21 o
  -1   3  28   296.76   319.74     7.99 o
   2   3  28     2.72    12.20     4.66 <
  -2   3  28     2.74     4.44     5.77 <
   0   4  28     2.06     2.88     5.10 <
   1   4  28   105.78   103.62     5.33 o
  -1   4  28   105.77   104.29     5.33 o
   2   4  28    12.56    17.97     4.88 o
  -2   4  28    12.59    17.53     5.33 o
   0   5  28     0.83    -3.33     5.10 <
   1   5  28    12.42    11.76     4.44 <
  -1   5  28    12.43    18.64     5.33 o
   2   5  28     0.81    11.09     4.88 <
  -2   5  28     0.80     8.88     5.10 <
   0   6  28    14.76     6.21     4.66 <
   1   6  28    19.74    22.63     5.10 o
  -1   6  28    19.78    26.85     4.66 o
   2   6  28    14.61    22.85     5.10 o
  -2   6  28    14.58    18.19     5.33 o
   0   7  28     6.63     1.78     5.77 <
   1   7  28    39.00    36.17     5.33 o
  -1   7  28    38.93    31.73     5.10 o
   0   8  28     1.11     2.44     5.55 <
   1   8  28    20.41    25.96     5.77 o
  -1   8  28    20.38    17.97     5.55 o
   1   0  29   461.17   512.12    12.20 o
   2   0  29    22.60    32.62     5.10 o
   0   1  29    23.37    28.18     4.88 o
   1   1  29   381.31   426.03    10.87 o
  -1   1  29   381.38   432.02    10.21 o
   2   1  29     3.69    11.98     4.66 <
  -2   1  29     3.68    15.53     5.33 <
   0   2  29     8.99    10.21     5.33 <
   1   2  29   534.08   594.89    13.76 o
  -1   2  29   534.17   588.01    12.65 o
   2   2  29    50.87    35.06     5.10 o
  -2   2  29    50.83    29.95     5.33 o
   0   3  29    67.99    94.30     5.99 o
   1   3  29   506.30   548.07    11.98 o
  -1   3  29   506.29   537.64    11.09 o
   2   3  29    18.96    16.64     4.88 o
  -2   3  29    19.04    18.64     6.21 <
   0   4  29    14.56    16.64     5.33 o
   1   4  29    14.09    14.20     4.88 <
  -1   4  29    14.03    14.20     4.88 <
   2   4  29    20.14    22.19     4.88 o
  -2   4  29    20.19    25.74     5.77 o
   0   5  29    12.43     9.10     5.33 <
   1   5  29    63.42    56.14     5.10 o
  -1   5  29    63.43    52.37     5.55 o
   2   5  29    21.37    10.43     4.88 <
  -2   5  29    21.33    25.07     5.33 o
   0   6  29    47.19    24.63     5.33 o
   1   6  29    91.96   103.40     5.55 o
  -1   6  29    91.98    86.09     5.33 o
   0   7  29     1.79     5.33     5.77 <
   1   7  29    33.43    29.95     5.55 o
  -1   7  29    33.44    43.27     5.10 o
   0   8  29     1.89     5.33     5.77 <
   0   0  30    29.59    36.83     7.54 o
   1   0  30   220.12   221.45     7.32 o
   2   0  30     8.82    13.09     5.55 <
   0   1  30     7.93    13.54     5.33 <
   1   1  30   164.48   197.04     7.99 o
  -1   1  30   164.52   199.92     7.32 o
   2   1  30    38.88    43.05     5.10 o
  -2   1  30    38.88    45.93     5.55 o
   0   2  30     1.79     3.33     5.33 <
   1   2  30   153.76   173.07     7.10 o
  -1   2  30   153.86   164.20     6.66 o
   2   2  30    13.61    13.76     5.10 <
  -2   2  30    13.61    22.63     5.77 o
   0   3  30     0.37    -4.66     5.55 <
   1   3  30   239.32   228.32     7.32 o
  -1   3  30   239.24   250.07     7.54 o
   2   3  30    27.61    25.07     5.10 o
  -2   3  30    27.64    18.42     6.43 <
   0   4  30     7.16    11.09     5.55 <
   1   4  30     8.36     6.21     4.88 <
  -1   4  30     8.32     6.66     5.10 <
   2   4  30    40.21    34.61     5.55 o
  -2   4  30    40.21    37.28     5.77 o
   0   5  30     4.31    14.87     5.55 <
   1   5  30     6.99     9.32     5.10 <
  -1   5  30     7.00    17.09     5.55 o
   0   6  30     0.35    -1.33     5.33 <
   1   6  30    34.46    24.63     5.33 o
  -1   6  30    34.40    32.84     5.55 o
   0   7  30    11.36    17.09     5.99 <
   1   0  31    11.90    18.64     5.55 o
   2   0  31     0.94     4.44     5.99 <
   0   1  31    24.23    19.30     5.55 o
   1   1  31    23.29     5.55     6.21 <
  -1   1  31    23.24    12.43     5.77 <
   2   1  31    45.71    26.40     5.77 o
  -2   1  31    45.75    29.29     6.21 o
   0   2  31     5.85    15.31     5.99 <
   1   2  31    24.05    29.29     5.77 o
  -1   2  31    24.09    29.07     5.99 o
   2   2  31   202.62   220.56     7.32 o
  -2   2  31   202.33   227.44     9.10 o
   0   3  31    32.32    42.38     5.55 o
   1   3  31    34.81    38.16     5.55 o
  -1   3  31    34.87    43.71     6.21 o
   0   4  31    10.50    20.64     5.77 o
   1   4  31    35.13    31.95     5.10 o
  -1   4  31    35.05    42.82     5.77 o
   0   5  31     2.55    11.76     5.77 <
   1   5  31     5.38    15.75     5.10 o
  -1   5  31     5.36     6.66     5.77 <
   0   6  31     9.88     6.88     5.55 <
   0   0  32     4.54     6.43     7.99 <
   1   0  32     2.21     3.99     6.21 <
   0   1  32    53.47    50.81     5.99 o
   1   1  32    72.16    50.15     6.66 o
  -1   1  32    72.12    63.68     6.43 o
   0   2  32     0.56     3.33     5.99 <
   1   2  32    53.32    63.24     6.21 o
  -1   2  32    53.35    59.69     6.66 o
   0   3  32     6.34     3.33     5.77 <
   1   3  32    19.92    27.29     5.55 o
  -1   3  32    19.93    18.42     6.43 <
   0   4  32     2.78     2.00     5.99 <
   1   4  32    11.07    18.64     5.55 o
  -1   4  32    11.08    21.52     5.99 o
   0   5  32    10.64    28.18     5.77 o
   1   0  33     3.02     6.43     6.66 <
   0   1  33    15.10     9.76     5.99 <
   1   1  33     9.59     7.32     6.88 <
  -1   1  33     9.63     9.32     5.77 <
   0   2  33     7.13     5.33     5.77 <
   1   2  33    33.24    43.05     5.99 o
  -1   2  33    33.17    49.70     6.66 o
   0   3  33     4.51     9.10     5.77 <
   1   3  33    15.42    28.85     5.77 o
  -1   3  33    15.42    31.95     6.66 o
   0   4  33     1.10    -5.77     5.99 <
   0   0  34    40.96    38.83     8.88 o
   0   1  34     6.90    23.30     6.21 o
   0   2  34    11.59    -4.22     5.99 <
   0   3  34     0.12     9.32     5.99 <

loop_
 _twin_refln_datum_id
 _twin_refln_individual_id
 _twin_refln_index_h
 _twin_refln_index_k
 _twin_refln_index_l
 _twin_refln_F_squared_calc
 _twin_refln_F_squared_meas
 _twin_refln_F_squared_sigma
 _twin_refln_include_status
 ? ? ? ? ? ? ? ? ?
